# Supplementary material for: Are socioeconomic disparities in tobacco consumption increasing in India? A repeated cross-sectional multilevel analysis
Source: PubMed Central journal article supplement — BMJ Open. 2012 Sep 28;2(5):e001348. doi: 10.1136/bmjopen-2012-001348 (PMC3488713; doi:10.1136/bmjopen-2012-001348), 2012-09-28
Supplement: bmjopen-2012-001348.draft_revisions.pdf [file bmjopen-2012-001348.draft_revisions.pdf]

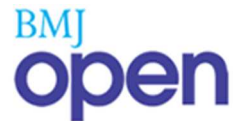

**Socioeconomic patterns in tobacco consumption over time  
in India: Examining trends from NFHS 2 and 3 in light of the  
Cigarette Epidemic Model**

|                                 |                                                                                                                                                                                                                                                                                                                                                                                                                                                                                                                                                                                                        |
|---------------------------------|--------------------------------------------------------------------------------------------------------------------------------------------------------------------------------------------------------------------------------------------------------------------------------------------------------------------------------------------------------------------------------------------------------------------------------------------------------------------------------------------------------------------------------------------------------------------------------------------------------|
| Journal:                        | <i>BMJ Open</i>                                                                                                                                                                                                                                                                                                                                                                                                                                                                                                                                                                                        |
| Manuscript ID:                  | bmjopen-2012-001348                                                                                                                                                                                                                                                                                                                                                                                                                                                                                                                                                                                    |
| Article Type:                   | Research                                                                                                                                                                                                                                                                                                                                                                                                                                                                                                                                                                                               |
| Date Submitted by the Author:   | 19-Apr-2012                                                                                                                                                                                                                                                                                                                                                                                                                                                                                                                                                                                            |
| Complete List of Authors:       | Bhan, Nandita; Harvard School of Public Health, Society, Human Development and Health<br>Srivastava, Swati; Public Health Foundation of India,<br>Agrawal, Sutapa; South Asia Network for Chronic Diseases (SANCD),<br>Subramanyam, Malavika; School of Public Health, University of Michigan,<br>Center for Integrative Approaches to Health Disparities<br>Millett, Christopher; Imperial College, Primary Care and Social Medicine<br>Selvaraj, Sakthivel; Public Health Foundation of India,<br>Subramanian, S V; Harvard School of Public Health, Department of<br>Society, Human Development and |
| <b>Primary Subject Heading</b>: | Smoking and tobacco                                                                                                                                                                                                                                                                                                                                                                                                                                                                                                                                                                                    |
| Secondary Subject Heading:      | Global health, Epidemiology                                                                                                                                                                                                                                                                                                                                                                                                                                                                                                                                                                            |
| Keywords:                       | PUBLIC HEALTH, PREVENTIVE MEDICINE, SOCIAL MEDICINE, Epidemiology<br>< THORACIC MEDICINE                                                                                                                                                                                                                                                                                                                                                                                                                                                                                                               |
|                                 |                                                                                                                                                                                                                                                                                                                                                                                                                                                                                                                                                                                                        |

SCHOLARONE™  
Manuscripts

1  
2  
3  
4  
5  
6 **Socioeconomic patterns in tobacco consumption over time in India:**  
7  
8 **Examining trends from NFHS 2 and 3 in light of the Cigarette Epidemic**  
9  
10 **Model**  
11  
12  
13  
14

15  
16 **Corresponding Author:**

17 SV Subramanian  
18 Professor of Population Health and Geography Department of Society, Human  
19 Development and Health, Harvard School of Public Health  
20 7<sup>th</sup> Floor, Kresge Building, 677 Huntington Ave, Boston MA 02115, USA  
21 Phone: +1 617 432 6299  
22 Fax: +1 617 432 3123  
23 Email: [sysubram@hsph.harvard.edu](mailto:sysubram@hsph.harvard.edu)  
24  
25  
26  
27  
28

29 **Authors:**

30 Nandita Bhan<sup>1</sup>  
31 Swati Srivastava<sup>2</sup>  
32 Sutapa Agrawal<sup>3</sup>  
33 Malavika Subramanyam<sup>4</sup>  
34 Christopher Millett<sup>5</sup>  
35 Sakthivel Selvaraj<sup>2</sup>  
36 SV Subramanian<sup>1</sup>  
37  
38

39 <sup>1</sup> Department of Society, Human Development and Health, Harvard School of Public Health, Harvard  
40 University, Boston, USA

41 <sup>2</sup> Public Health Foundation of India (PHFI), New Delhi, India

42 <sup>3</sup> South Asia Network for Chronic Diseases (SANCD), New Delhi, India

43 <sup>4</sup> Center for Integrative Approaches to Health Disparities, School of Public Health, University of Michigan,  
44 Michigan, USA

45 <sup>5</sup> School of Public Health, Imperial College London, London, UK  
46  
47  
48  
49

50 **Word Count: 1375 words**  
51  
52  
53  
54  
55  
56  
57  
58  
59  
60

**ABSTRACT: (250 words)**

**Objectives:** India bears a significant portion of the global tobacco burden with high prevalence of tobacco among men (47%) and women (14%). Smoking, chewing and dual use (smoking and chewing) in India show socioeconomic and spatial gradients among both men and women.

**Design:** Cross-sectional Surveys, NFHS -2 and 3, India

**Setting & participants:** 131,464 men and 130,886 women (NFHS-2) and 69,755 men and 124,142 women (NFHS -3) in India

**Outcomes & methods:** Survey-weighted age-standardized prevalence and relative percentage change over time in smoking, chewing tobacco and Dual Use of tobacco. Multi-level models with state, local area and individual as analytical levels were used to estimate probability of smoking and chewing, and significance of the trend.

**Findings:** a) increases in tobacco consumption among men with sharper inequalities in smoking compared to chewing; higher risks for the less educated, poorer, rural and lower caste populations, b) greater change in risk and percentage increases among high educated, urban, richer groups, previously unreported, c) low and declining smoking risks and unclear patterns in chewing among women, d) significant increases in smoking and chewing prevalence among younger men, and in chewing prevalence among younger women.

**Conclusions:** Our results add qualitatively to the propositions of the *Cigarette Epidemic Model* showing significant diversions in the patterns in India compared to developed countries – from gender and socioeconomic perspectives. Given the twin burden of smoking and chewing and their unique challenges, we recommend separate analyses by tobacco type to understand the unique drivers of smoking and chewing in India.

## Article Summary

### Article Focus

- India bears a significant burden of tobacco consumption, with high prevalence of smoking and chewing among men & women, and previous studies have established a unique social and spatial gradient in consumption.
- No studies have provided estimates and inferences on changing trends in tobacco consumption over time, either through prevalence or relative risks.
- This study estimates socioeconomic trends and identifies the changing dynamics of tobacco consumption in light of the *Cigarette Epidemic Model*.

### Key Messages

- Sharper and rising inequalities for smoking compared to chewing among men, versus low and declining risks for women.
- Higher risks of smoking and chewing among men for the less educated, poorer, rural and lower caste populations, but greater increases in risks among the high educated, urban, richer groups, previously unreported.
- significant increases in smoking and chewing prevalence among younger men, and in chewing prevalence among younger women.

### Strengths & limitations

- First systematic examination of socioeconomic trends in tobacco consumption in India and linking it to a previously developed model to understand tobacco consumption transition.
- Estimates for relative risk, age-standardised prevalence and percentage change over time, highlighting vulnerable groups.
- Limitations include inability to differentiate between type of cigarette and estimate the volume of consumption.

## INTRODUCTION

Global estimates indicate that one in ten adult deaths can be attributed to tobacco consumption, leading to approximately 5 million global deaths per year[1]. Of these, 2.4 million deaths occur in developing countries. India bears a significant portion of this global tobacco burden[2-3]. Consumption of both smoked and smoke-less (chewed and inhaled) forms of tobacco is highly prevalent among men (47%) and women (14%)[4]. However, previous studies have indicated that tobacco use, like other Non-Communicable Disease risk factors, is unequally distributed across different social determinants in India – education, caste and wealth – among both men and women[1,4,5,6], indicating a distinct “economic and spatial distribution” in tobacco use[5]. No studies have yet systematically examined trends and changes in the prevalence of tobacco consumption in India by socioeconomic factors over time.

This research paper provides estimates and inferences on the changing gradient of tobacco consumption in India, analysing prevalence patterns from the National Family Health Surveys[7-8]. We discuss our findings in light of the Cigarette Epidemic Model[9-10] and examine what populations show higher and lower prevalence of tobacco consumption over time.

## METHODS

Data from the National Family Health Surveys in 1998-9 and 2005-6 (NFHS 2 & 3) was analysed and survey-weighted age-standardized prevalence estimates together with percentage change were estimated. Analysis was restricted to men and women in the age group 15-49 years for comparability. NFHS data covers 99% of India’s population and is representative of all states. Details on sample design and survey implementation are provided in the basic survey reports[7-8]. Dependent variables in the analyses included **smoking** (cigarettes, *bidis* and pipes/cigar), **chewing tobacco** (*paan masala*, *gutkha* or other chewed forms of tobacco) and **dual use** (consuming both smoked and smoke-less

forms) of tobacco. Independent variables in the analysis include age categories, marital status and education level at the individual level, and household wealth, area of residence, religion and caste/tribe status at the household level (*Variable definitions are provided Table 1*). Multi-level models with state, local area and individual as analytical levels were used to estimate the log odds and probability of smoking and chewing by education and wealth among men and women. Tests for trend including joint tests for significance of time trends and significance of random effects were estimated. Model estimates were maximum likelihood-based using the Iterative Generalized Least-Squares (IGLS) algorithm and controlled for age, marital status and religion.

## RESULTS

Data used in this analysis covers 131,464 men and 130,886 women residing in 92,486 households in NFHS-2 and 69,755 men and 124,142 women residing in 109,041 households in NFHS-3, with an overall response rate of 96% for NFHS-2 and 98% for NFHS-3 (Table 1). Change in prevalence of smoking, chewing and dual use of tobacco over survey rounds by education, wealth and caste is shown in table 1, and figures 1-3 show the percentage change in and probability of smoking and chewing by wealth and education among men and women. Additional results on the multilevel models and tests of significance for trends are presented in web tables 1-2, while web table 3 presents the prevalence of smoking and chewing by age, residence, religion and marital status.

Among men, the prevalence of smoking, chewing and dual use of tobacco are seen to unanimously increase across all socioeconomic groups. While the relative prevalence of tobacco use is higher among socioeconomically disadvantaged groups – less educated, lower wealth, living in rural areas or lower caste; higher proportional increase in prevalence over time is seen among social groups with higher SES. E.g. change in smoking prevalence among men in the richest quintile is 63% while that in the poorest quintile is 13%; similarly smoking prevalence among those with post graduate level of education increases by 98% and those with no education increases by 13%. Sharper

1  
2  
3 inequalities with greater inter-group differences are seen in smoking compared to  
4 chewing. Prevalence of chewing among men in the richest quintile and with post graduate  
5 education increased by 49%, while that for the poorest increased by 35% and for the  
6 illiterate increased by 37%. Prevalence trends among women were less clear with overall  
7 rates staying significantly low compared to men; women in most social groups showed a  
8 declining trend for smoking and only scheduled caste women and those with college  
9 education showed small increases in smoking and chewing. All prevalence estimates  
10 were age standardized. Adjusted probability estimates for smoking and chewing were  
11 calculated from multi-level models (figure 3) and probability trends are seen to resonate  
12 with prevalence estimates. Tests for trend over time for smoking among men are  
13 significant for wealth, education and residence, while for chewing are significant for  
14 wealth only (web table 1). Tests for trend over time for smoking among women are  
15 significant for wealth and residence, while for chewing significant trend is seen for  
16 wealth, education and residence (web table 2). Random effects estimates are seen to be  
17 significant at both local area and state level, with higher variation at local area level.  
18  
19  
20  
21  
22  
23  
24  
25  
26  
27  
28  
29  
30  
31  
32  
33  
34  
35  
36

## 37 DISCUSSION

38  
39  
40 In 1994, Lopez et al.[9] proposed the Cigarette Epidemic Model that discussed the  
41 transition of smoking prevalence, consumption amount and mortality in developed  
42 countries in four stages. In stage I, male prevalence is comparatively low (<15%) and  
43 female smoking due to sociocultural factors does not exceed 5%; in stage II, male  
44 prevalence rises to 50-80% and female smoking increases at a lagged pace behind men.  
45 In stage III, prevalence of smoking among men and women stabilizes at 40% and 35%  
46 respectively, and younger populations are seen to smoke more than older populations. In  
47 Stage IV, prevalence of smoking gradually declines among both men and women, but the  
48 effects of previous stages are seen in high mortality attributable to smoking. In 2011,  
49 Thun et al.[10] proposed a modification to this model relevant for developing countries  
50  
51  
52  
53  
54  
55  
56  
57  
58  
59  
60

1  
2  
3 where smoking patterns among men and women distinctly differ from patterns noted in  
4 developed countries.  
5

6  
7 Our results show that India is somewhere between stages II and III of the Cigarette  
8 Epidemic model for the smoking rates seen for men, but distinctly differs in the  
9 prevalence rates seen for women. We note several distinctions in the Indian scenario  
10 from the propositions of this model. **First**, the burden of tobacco consumption in India  
11 follows two separate trajectories for smoking and chewing, and even within smoking,  
12 differences may be seen in the consumption of cigarettes and *bidis* that are combined in  
13 most analyses. **Second**, a unique socioeconomic and spatial gradient (not reported in the  
14 model) is seen in India by the diverse axes – wealth, education and caste – and  
15 prevalence results indicates a dichotomy in the understanding of this gradient. We find  
16 higher prevalence rates among socioeconomically disadvantaged groups (lower caste,  
17 wealth and education levels) but higher relative percentage increases among the  
18 socioeconomically advantaged groups (higher caste, wealth and education levels). No  
19 other study has reported this finding. We also recommend that analyses by type and  
20 amount of tobacco consumed be examined systematically to understand the direction of  
21 these trends. **Third**, despite women’s empowerment in India, large-scale increases in  
22 women’s smoking are yet to be seen, as seen in the developed countries[11]. Aggregate  
23 estimates show that women are far behind men in prevalence rates; and smoking and  
24 chewing rates among women, barring a few groups are seen to be declining. **Finally**, a  
25 missing component in understanding the burden of tobacco in India needs to come from  
26 cause-specific or cancer mortality studies[12]. Currently, only ecological analyses of  
27 these are possible due to lack of surveillance data in India[13], and hence a systematic  
28 examination of mortality attributable to tobacco consumption will assist in understanding  
29 where India is vis-a-vis this model.  
30  
31  
32  
33  
34  
35  
36  
37  
38  
39  
40  
41  
42  
43  
44  
45  
46  
47  
48

49 This study is the first systematic examination of trends in socioeconomic distributions of  
50 tobacco consumption in India. Data from this analysis is representative and generalizable  
51 to the Indian population. However, the limitations of this study include that data is cross-  
52 sectional and categories of tobacco consumed are not available for NFHS -2. Despite  
53 these, we believe that India is experiencing a unique economic and social transition that  
54  
55  
56  
57  
58  
59  
60



1  
2  
3 is likely to manifest in a number of health inequalities including tobacco consumption. In  
4 order to ensure policy effectiveness over time, there is a need to systematically monitor  
5 and examine the social inequities in tobacco consumption over time and channel  
6 interventions to the social groups that are most vulnerable to these inequalities.  
7  
8  
9  
10  
11  
12  
13  
14  
15  
16  
17  
18  
19  
20  
21  
22  
23  
24  
25  
26  
27  
28  
29  
30  
31  
32  
33  
34  
35  
36  
37  
38  
39  
40  
41  
42  
43  
44  
45  
46  
47  
48  
49  
50  
51  
52  
53  
54  
55  
56  
57  
58  
59  
60

For peer review only

Table 1: Frequency and prevalence of tobacco smoking, chewing and dual use (smoking and chewing) in the National Family Health Surveys 1998-99 and 2005-6

|                            | Sample Population        |                          | MEN                  |                       |     |                       |                      |     |                      |                      |                    | FEMALE               |        |                      |                       |        |                      |                       |        |     |
|----------------------------|--------------------------|--------------------------|----------------------|-----------------------|-----|-----------------------|----------------------|-----|----------------------|----------------------|--------------------|----------------------|--------|----------------------|-----------------------|--------|----------------------|-----------------------|--------|-----|
|                            |                          |                          | SMOKE                |                       |     | CHEW                  |                      |     | DUAL                 |                      |                    | SMOKE                |        |                      | CHEW                  |        |                      | DUAL                  |        |     |
|                            |                          |                          | 1998-9               | 2005-6                | % Δ | 1998-9                | 2005-6               | % Δ | 1998-9               | 2005-6               | % Δ                | 1998-9               | 2005-6 | % Δ                  | 1998-9                | 2005-6 | % Δ                  | 1998-9                | 2005-6 | % Δ |
| <b>Caste/ tribe status</b> |                          |                          |                      |                       |     |                       |                      |     |                      |                      |                    |                      |        |                      |                       |        |                      |                       |        |     |
| <i>General</i>             | (M) 50,939<br>(F) 50,526 | (M) 21,850<br>(F) 41,844 | 22.2<br>(21.4, 22.9) | 28.8<br>(27.7, 29.9)  | 30  | 22.2<br>(21.4, 23.02) | 33.2<br>(31.8, 34.5) | 50  | 7.4<br>(6.9, 7.8)    | 10.8<br>(10.0, 11.5) | 1.0<br>(0.9, 1.1)  | 0.8<br>(0.55, 1.0)   | -20    | 6.6 (6.1, 7.1)       | 7.24<br>(6.6, 7.85)   | 10     | 0.24<br>(0.17, 0.3)  | 0.2<br>(0.11, 0.27)   |        |     |
| <i>SC</i>                  | (M) 21,491<br>(F) 21,045 | (M) 11,953<br>(F) 20,566 | 31.5<br>(30.5, 32.5) | 39.3<br>(37.8, 40.9)  | 25  | 27.8<br>(26.6, 29.1)  | 40.5<br>(38.8, 42.1) | 46  | 12.1<br>(11.4, 12.8) | 15.8<br>(14.7, 16.9) | 2.3<br>(1.9, 2.8)  | 2.4<br>(2.05, 2.8)   | 4      | 10.9<br>(10.1, 11.8) | 12.1<br>(11.2, 12.9)  | 11     | 0.5<br>(0.4, 0.7)    | 0.4<br>(0.3, 0.6)     |        |     |
| <i>ST</i>                  | (M) 16,187<br>(F) 16,520 | (M) 8,453<br>(F) 16,518  | 30.6<br>(28.8, 32.3) | 36.6<br>(34.1, 39.1)  | 20  | 38.6<br>(36.9, 40.4)  | 52.6<br>(49.9, 55.3) | 36  | 14.5<br>(13.3, 15.6) | 18.6<br>(16.7, 20.4) | 3.0<br>(2.5, 3.6)  | 2.7<br>(2.04, 3.4)   | -10    | 18.5<br>(17.0, 20.1) | 25.08<br>(22.8, 27.4) | 36     | 1.0<br>(0.7, 1.2)    | 0.9<br>(0.6, 1.3)     |        |     |
| <i>OBC</i>                 | (M) 36,381<br>(F) 36,290 | (M) 25,144<br>(F) 29,561 | 24.7<br>(23.9, 25.5) | 31.2<br>(30.2, 32.2)  | 26  | 25.4<br>(24.5, 26.3)  | 36.2<br>(35.0, 37.5) | 43  | 9.9<br>(9.4, 10.5)   | 13.1<br>(12.3, 13.8) | 1.5<br>(1.3, 1.7)  | 1.4<br>(1.2, 1.7)    | -7     | 7.3<br>(6.8, 7.7)    | 7.08<br>(6.6, 7.6)    | -3     | 0.3<br>(0.26, 0.4)   | 0.14<br>(0.09, 0.21)  |        |     |
| <i>No caste</i>            | (M) 6,466<br>(F) 6,505   | (M) 2,355<br>(F) 5,653   | 31.8<br>(29.4, 34.3) | 37.9<br>(34.2, 41.6)  | 19  | 23.3<br>(20.9, 25.6)  | 35.5<br>(31.6, 39.3) | 52  | 10.7<br>(9.3, 12.1)  | 13.0<br>(10.9, 15.2) | 1.4<br>(0.8, 1.9)  | 0.9<br>(0.36, 1.48)  | -36    | 10.3<br>(9.1, 11.6)  | 12.8<br>(10.8, 14.8)  | 24     | 0.4<br>(0.2, 0.6)    | 0.31<br>(0.03, 0.59)  |        |     |
| <b>Education Level</b>     |                          |                          |                      |                       |     |                       |                      |     |                      |                      |                    |                      |        |                      |                       |        |                      |                       |        |     |
| <i>Post graduate</i>       | (M) 3,432<br>(F) 1,963   | (M) 2,920<br>(F) 3,526   | 7.6<br>(6.5, 8.7)    | 15.05<br>(13.0, 17.1) | 98  | 12.4<br>(10.8, 14.1)  | 18.5<br>(16.0, 21.1) | 49  | 1.7<br>(1.2, 2.2)    | 4.04<br>(3.0, 5.1)   | 0.2 (-0.2, 0.6)    | 0.02 (-0.007, 0.05)  | -90    | 1.2<br>(0.45, 1.9)   | 0.33<br>(0.14, 0.5)   | -73    | 0.2 (-0.17, 0.5)     | 0.004 (-0.002, 0.012) |        |     |
| <i>College</i>             | (M) 11,340<br>(F) 6,586  | (M) 7,811<br>(F) 9,424   | 11.1<br>(10.2, 11.9) | 20.7<br>(19.2, 22.1)  | 86  | 14.9<br>(13.9, 15.8)  | 23.9<br>(22.3, 25.6) | 60  | 3.5<br>(3.1, 3.9)    | 6.7<br>(5.8, 7.6)    | 0.1 (-0.01, 0.2)   | 0.11<br>(0.03, 0.19) | 10     | 1.3<br>(0.9, 1.6)    | 1.8<br>(1.4, 2.2)     | 39     | 0.05 (-0.04, 0.14)   | 0.04 (-0.017, 0.1)    |        |     |
| <i>High school</i>         | (M) 69,996<br>(F) 46,629 | (M) 26,100<br>(F) 34,338 | 21.2<br>(20.7, 21.8) | 24.7<br>(23.8, 25.5)  | 17  | 23.3<br>(22.7, 23.9)  | 33.1<br>(32.0, 34.1) | 42  | 7.8<br>(7.5, 8.2)    | 9.9<br>(9.3, 10.6)   | 0.2<br>(0.17, 0.3) | 0.07<br>(0.04, 0.1)  | -65    | 4.2 (3.9, 4.6)       | 3.4<br>(3.04, 3.7)    | -19    | 0.1<br>(0.06, 0.13)  | 0.04 (0.02, 0.06)     |        |     |
| <i>Primary school</i>      | (M) 21,730<br>(F) 20,604 | (M) 12,622<br>(F) 19,451 | 32.7<br>(31.7, 33.6) | 35.6<br>(34.3, 36.9)  | 1   | 30.2<br>(29.2, 31.2)  | 41.9<br>(40.5, 43.4) | 39  | 12.1<br>(11.4, 12.7) | 14.8<br>(13.8, 15.7) | 0.7<br>(0.5, 0.8)  | 0.2<br>(0.13, 0.3)   | -71    | 9.0<br>(8.4, 9.6)    | 7.4<br>(6.8, 8.02)    | -18    | 0.18<br>(0.13, 0.24) | 0.07<br>(0.03, 0.11)  |        |     |
| <i>Illiterate</i>          | (M) 24,966               | (M) 20,302               | 38.9                 | 43.9                  | 13  | 34.4                  | 47.1                 | 37  | 15.9                 | 18.9                 | 2.6                | 2.3                  | -12    | 11.9                 | 13.3                  | 12     | 0.6                  | 0.42                  |        |     |

|                         |                                  |                                 |                          |                         |    |                         |                              |    |                         |                             |                         |                         |     |                          |                          |     |                         |                           |
|-------------------------|----------------------------------|---------------------------------|--------------------------|-------------------------|----|-------------------------|------------------------------|----|-------------------------|-----------------------------|-------------------------|-------------------------|-----|--------------------------|--------------------------|-----|-------------------------|---------------------------|
|                         | (F) 55,104                       | (F) 57,403                      | (37.9,,<br>39.9)         | (42.8,<br>45.2)         |    | (33.2,35<br>.5)         | (45.7,<br>48.5)              |    | (15.1,<br>16.6)         | (17.<br>9,19<br>.9)         | (2.4,,2.<br>9)          | (2.02,2<br>.6)          |     | (11.4,<br>12.6)          | (12.6,<br>13.0)          |     | (0.53,0<br>.72)         | (0.33,0<br>.51)           |
| <b>Wealth Quintiles</b> |                                  |                                 |                          |                         |    |                         |                              |    |                         |                             |                         |                         |     |                          |                          |     |                         |                           |
| <i>Richest</i>          | (M) 26,291<br>(F) 26,177         | (M) 13,706<br>(F) 24,837        | 11.9<br>(11.2,<br>12.5)  | 19.9<br>(18.8,<br>21.1) | 63 | 13.7<br>(12.8,14<br>.6) | 20.4<br>(19.0,<br>21.8)      | 49 | 3.3<br>(2.97,<br>3.6)   | 5.8<br>(5.1,<br>6.4)        | 0.2<br>(0.1,0.<br>3)    | 0.14<br>(0.08,0<br>.2)  | -30 | 2.2<br>(1.9,2.5<br>)     | 2.02<br>(1.7,2.<br>3)    | -8  | 0.05<br>(0.01,0<br>.07) | 0.042<br>(0.009,<br>0.07) |
| <i>Richer</i>           | (M) 26,293<br>(F) 26,177         | (M) 13,946<br>(F) 24,837        | 19.3<br>(18.5,<br>20.04) | 25.8<br>(24.6,<br>27.1) | 37 | 19.0<br>(18.1,19<br>.9) | 30.2<br>(28.7,<br>31.7)      | 59 | 5.6<br>(5.2,6<br>.02)   | 9.3<br>(8.4,<br>10.2<br>)   | 0.46<br>(0.37,0<br>.54) | 0.37<br>(0.27,0<br>.47) | -20 | 5.4<br>(4.9,5.9<br>)     | 4.9<br>(4.4,5.<br>4)     | -9  | 0.1<br>(0.07,0<br>.18)  | 0.06<br>(0.02,0<br>.09)   |
| <i>Middle</i>           | (M) 26,294<br>(F) 26,174         | (M) 14,075<br>(F) 24,826        | 25.6<br>(24.7,2<br>6.4)  | 31.4<br>(30.1,<br>32.7) | 25 | 22.9<br>(22.0,23<br>.9) | 34.9<br>(33.4,<br>36.3)      | 52 | 7.6<br>(7.2,8<br>.1)    | 11.5<br>(10.<br>6,12<br>.3) | 1.1<br>(0.9,1.<br>3)    | 0.7<br>(0.6,0.<br>9)    | -36 | 7.8<br>(7.2,8.3<br>)     | 6.9<br>(6.4,7.<br>4)     | -11 | 0.23<br>(0.16,0<br>.3)  | 0.07<br>(0.04,0<br>.11)   |
| <i>Poorer</i>           | (M) 26,293<br>(F) 26,179         | (M) 14,007<br>(F) 24,814        | 30.6<br>(29.7,3<br>1.5)  | 36.5<br>(35.2,<br>37.8) | 21 | 28.9<br>(28.0,29<br>.9) | 39.5<br>(38.0<br>3,40.<br>9) | 37 | 11.6<br>(10.9,<br>12.2) | 14.5<br>(13.<br>6,15<br>.5) | 1.7<br>(1.5,1.<br>9)    | 1.7<br>(1.4,1.<br>9)    | 0   | 10.9,<br>(10.3,11<br>.6) | 10.5<br>(9.8,12<br>.2)   | -4  | 0.4<br>(0.3,0.<br>5)    | 0.24<br>(0.17,0<br>.31)   |
| <i>Poorest</i>          | (M) 26,293<br>(F) 26,179         | (M) 14,021<br>(F) 24,828        | 35.5<br>(34.4,,<br>36.5) | 40.6,<br>39.3,<br>41.9) | 13 | 36.8<br>(35.7,37<br>.9) | 49.7<br>(48.2,<br>51.2)      | 35 | 16.7<br>(15.9,<br>17.5) | 19.4<br>(18.<br>4,20<br>.5) | 3.5<br>(3.1,3.<br>9)    | 3.2<br>(2.8,3.<br>7)    | -9  | 14.1<br>(13.3,15<br>.0)  | 17.1<br>(16.03,<br>18.1) | 21  | 0.9<br>(0.7,1.<br>0)    | 0.7<br>(0.52,0<br>.86)    |
| <i>Total</i>            | (M)<br>131,464<br>(F)<br>130,886 | (M)<br>69,755<br>(F)<br>124,142 |                          |                         |    |                         |                              |    |                         |                             |                         |                         |     |                          |                          |     |                         |                           |

<sup>1</sup>Large city: urban population ≥1 million; Small city: 100000-1 million; Town: ≤100000 million

<sup>2</sup>Scheduled castes and scheduled tribes are identified by the Government of India as socially and economically backward and needing protection from social injustice and exploitation. Other backward class is a diverse collection of intermediate castes that were considered low in the traditional caste hierarchy but are clearly above scheduled castes. General is thus a default residual group that enjoys higher status in the caste hierarchy.

<sup>3</sup>Others include Sikh, Buddhist, Jain, Jewish, Zoroastrian and Others

<sup>4</sup>Post graduate:15 or more years of education; college: 13-15 years of education; high school: 8-12 years of education; secondary: 5-8 years of education; primary: 0-5 years of education; illiterate: 0 years of education

\*Percentage change (% Δ) numbers have been rounded to the nearest integer.

1  
2  
3  
4  
5  
6  
7  
8  
9  
10  
11  
12  
13  
14  
15  
16  
17  
18  
19  
20  
21  
22  
23  
24  
25  
26  
27  
28  
29  
30  
31  
32  
33  
34  
35  
36  
37  
38  
39  
40  
41  
42  
43  
44  
45  
46  
47  
48  
49

**Web Tables:**

**Table 1: Pooled Regression Models showing Odds Ratios (95% CIs) for Smoking and Chewing among men and interactions for wealth, education, residence and caste over time.**

| Covariates                             | Smoking             |                                  |                                     |                                              |                                 | Chewing             |                                  |                                     |                                              |                                 |
|----------------------------------------|---------------------|----------------------------------|-------------------------------------|----------------------------------------------|---------------------------------|---------------------|----------------------------------|-------------------------------------|----------------------------------------------|---------------------------------|
|                                        | Model 1: Full Model | Model 2: Interaction with Wealth | Model 3: Interaction with Education | Model 4: Interaction with Living Environment | Model 5: Interaction with Caste | Model 1: Full Model | Model 2: Interaction with Wealth | Model 3: Interaction with Education | Model 4: Interaction with Living Environment | Model 5: Interaction with Caste |
| <b>Wealth Quintiles (Richest)</b>      | 1.00                | 1.00                             | 1.00                                | 1.00                                         | 1.00                            | 1.00                | 1.00                             | 1.00                                | 1.00                                         | 1.00                            |
| Richer                                 | 1.37<br>(1.32,1.43) | 1.51<br>(1.44,1.59)              | 1.37<br>(1.31,1.42)                 | 1.36<br>(1.3,1.41)                           | 1.37<br>(1.31,1.42)             | 1.43<br>(1.38,1.48) | 1.33<br>(1.27,1.4)               | 1.42<br>(1.36,1.47)                 | 1.42<br>(1.36,1.47)                          | 1.41<br>(1.36,1.47)             |
| Middle                                 | 1.71<br>(1.64,1.78) | 1.99<br>(1.89,2.1)               | 1.71<br>(1.64,1.78)                 | 1.68<br>(1.61,1.75)                          | 1.7<br>(1.63,1.77)              | 1.75<br>(1.68,1.82) | 1.63<br>(1.55,1.72)              | 1.73<br>(1.66,1.8)                  | 1.72<br>(1.65,1.8)                           | 1.72<br>(1.65,1.79)             |
| Poorer                                 | 2.06<br>(1.97,2.16) | 2.51<br>(2.37,2.65)              | 2.05<br>(1.93,2.14)                 | 2.02<br>(1.93,2.11)                          | 2.04<br>(1.95,2.14)             | 1.92<br>(1.84,2.01) | 1.77<br>(1.67,1.87)              | 1.89<br>(1.8,1.97)                  | 1.86<br>(1.78,1.95)                          | 1.87<br>(1.79,1.96)             |
| Poorest                                | 2.33<br>(2.22,2.46) | 2.88<br>(2.72,3.06)              | 2.31<br>(2.19,2.43)                 | 2.29<br>(2.18,2.41)                          | 2.3<br>(2.19,2.42)              | 2.1<br>(1.99,2.2)   | 1.93<br>(1.82,2.05)              | 2.03<br>(1.92,2.13)                 | 2.03<br>(1.932.13)                           | 2.02<br>(1.93,2.12)             |
| <b>Education (Post graduate)</b>       | 1.00                | 1.00                             | 1.00                                | 1.00                                         | 1.00                            | 1.00                | 1.00                             | 1.00                                | 1.00                                         | 1.00                            |
| College                                | 1.38<br>(1.28,1.49) | 1.41<br>(1.31,1.53)              | 1.34<br>(1.19,1.5)                  | 1.4 (1.29,1.51)                              | 1.4<br>(1.3,1.51)               | 1.26<br>(1.17,1.36) | 1.28<br>(1.19,1.39)              | 1.14<br>(1.02,1.27)                 | 1.29<br>(1.19,1.39)                          | 1.29<br>(1.2,1.39)              |
| High School                            | 1.81<br>(1.69,1.95) | 1.91<br>(1.78,2.05)              | 2.16<br>(1.95,2.4)                  | 1.87<br>(1.74,2.01)                          | 1.87<br>(1.74,2.01)             | 1.53<br>(1.43,1.65) | 1.64<br>(1.53,1.76)              | 1.46<br>(1.33,1.61)                 | 1.65<br>(1.54,1.77)                          | 1.66<br>(1.54,1.78)             |
| Primary                                | 2.73<br>(2.54,2.94) | 2.81<br>(2.61,3.04)              | 3.4<br>(3.05,3.78)                  | 2.77<br>(2.57,2.99)                          | 2.77<br>(2.57,2.99)             | 1.98<br>(1.84,2.13) | 2.04<br>(1.9,2.2)                | 1.84<br>(1.66,2.04)                 | 2.05<br>(1.9,2.21)                           | 2.06<br>(1.91,2.21)             |
| No education                           | 3.18<br>(2.96,3.43) | 3.27<br>(3.03,3.53)              | 4.07<br>(3.66,4.53)                 | 3.19<br>(2.96,4.34)                          | 3.18<br>(2.95,3.42)             | 2.09<br>(1.94,2.26) | 2.06<br>(1.91,2.22)              | 1.93<br>(1.74,2.14)                 | 2.07<br>(1.92,2.23)                          | 2.08<br>(1.93,2.24)             |
| <b>Living Environment (Large city)</b> | 1.00                | 1.00                             | 1.00                                | 1.00                                         | 1.00                            | 1.00                | 1.00                             | 1.00                                | 1.00                                         | 1.00                            |
| Small City                             | 0.77<br>(0.72,0.82) | 0.81<br>(0.76,0.87)              | 0.8<br>(0.74,0.85)                  | 0.82 (0.75,0.9)                              | 0.79<br>(0.74,0.84)             | 0.96<br>(0.89,1.02) | 1.02<br>(0.96,1.09)              | 1.02<br>(0.96,1.09)                 | 1.06<br>(0.97,1.16)                          | 1.03<br>(0.97,1.1)              |
| Town                                   | 0.78                | 0.83(0.79,0                      | 0.81(0.77,0                         | 0.88                                         | 0.81                            | 0.92                | 1.01                             | 1.01                                | 1.06                                         | 1.01                            |

|                            |                     |                     |                     |                     |                     |                     |                     |                      |                      |                     |
|----------------------------|---------------------|---------------------|---------------------|---------------------|---------------------|---------------------|---------------------|----------------------|----------------------|---------------------|
|                            | (0.74,0.82)         | .88                 | .85                 | (0.82,0.95)         | (0.77,0.85)         | (0.87,0.97)         | (0.95,1.06)         | (0.95,1.06)          | (0.98,1.15)          | (0.96,1.07)         |
| Village                    | 0.68<br>(0.65,0.71) | 0.75<br>(0.71,0.78) | 0.73<br>(0.7,0.77)  | 0.87<br>(0.82,0.92) | 0.73<br>(0.7,0.76)  | 0.76<br>(0.73,0.79) | 0.92<br>(0.88,0.96) | 0.92<br>(0.88,0.96)  | 0.93<br>(0.88,0.99)  | 0.93<br>(0.88,0.97) |
| <b>Caste/Tribe (Other)</b> | 1.00                | 1.00                | 1.00                | 1.00                | 1.00                | 1.00                | 1.00                | 1.00                 | 1.00                 | 1.00                |
| SC                         | 1.16<br>(1.12,1.2)  | 1.15<br>(1.11,1.19) | 1.15<br>(1.11,1.18) | 1.15<br>(1.11,1.19) | 1.16<br>(1.11,1.21) | 1.12<br>(1.08,1.15) | 1.1<br>(1.06,1.13)  | 1.1<br>(1.06,1.13)   | 1.1<br>(1.06,1.13)   | 1.1<br>(1.06,1.14)  |
| ST                         | 1.14<br>(1.09,1.2)  | 1.13 (1.08, 1.2)    | 1.14<br>(1.08,1.18) | 1.14 (1.09,1.2)     | 1.15<br>(1.09,1.21) | 3.02<br>(2.88,3.15) | 1.1<br>(1.06,1.15)  | 1.1<br>(1.05,1.15)   | 1.1<br>(1.05,1.15)   | 1.17<br>(1.11,1.24) |
| OBC                        | 1.00<br>(0.98,1.04) | 0.99<br>(0.97,1.02) | 0.99<br>(0.96,1.02) | 0.99<br>(0.97,1.02) | 1.03<br>(0.99,1.07) | 1.05<br>(1.02,1.08) | 1.01<br>(0.97,1.03) | 1.002<br>(0.97,1.03) | 1.003<br>(0.97,1.03) | 1.04<br>(0.99,1.07) |
| No Caste or missing        | 1.06<br>(1.01,1.13) | 1.07<br>(1.01,1.13) | 1.07<br>(1.01,1.13) | 1.08<br>(1.02,1.14) | 1.05<br>(0.98,1.13) | 0.97<br>(0.92,1.03) | 1.02<br>(0.96,1.08) | 1.01<br>(0.96,1.08)  | 1.02<br>(0.96,1.08)  | 0.97<br>(0.9,1.04)  |
| <b>Survey Year (Yr)</b>    |                     | 1.74<br>(1.7,1.88)  | 1.67<br>(1.46,1.91) | 1.49 (1.4,1.58)     | 1.24<br>(1.19,1.3)  |                     | 1.47<br>(1.38,1.56) | 1.34<br>(1.17,1.54)  | 1.69<br>(1.58,1.8)   | 1.72<br>(1.65,1.79) |
| Yr *Richer                 |                     | 0.78<br>(0.73,0.84) |                     |                     |                     |                     | 1.15<br>(1.07,1.24) |                      |                      |                     |
| Yr*Middle                  |                     | 0.68<br>(0.63,0.73) |                     |                     |                     |                     | 1.13<br>(1.05,1.22) |                      |                      |                     |
| Yr *Poorer                 |                     | 0.60<br>(0.56,0.65) |                     |                     |                     |                     | 1.15<br>(1.07,1.24) |                      |                      |                     |
| Yr *Poorest                |                     | 0.58<br>(0.53,0.62) |                     |                     |                     |                     | 1.11 (1.03, 1.2)    |                      |                      |                     |
| Yr *College                |                     |                     | 1.13<br>(0.97,1.32) |                     |                     |                     |                     | 1.27<br>(1.1,1.48)   |                      |                     |
| Yr * High School           |                     |                     | 0.78<br>(0.68,0.89) |                     |                     |                     |                     | 1.28<br>(1.11,1.47)  |                      |                     |
| Yr * Primary               |                     |                     | 0.66<br>(0.57,0.77) |                     |                     |                     |                     | 1.02<br>(0.88,,1.18) |                      |                     |
| Yr * No education          |                     |                     | 0.61<br>(0.53,0.70) |                     |                     |                     |                     | 1.01<br>(0.87,1.17)  |                      |                     |
| Yr *Small City             |                     |                     |                     | 0.99<br>(0.87,1.12) |                     |                     |                     |                      | 0.94<br>(0.82,1.06)  |                     |
| Yr * Town                  |                     |                     |                     | 0.89<br>(0.81,0.98) |                     |                     |                     |                      | 0.9<br>(0.82,0.99)   |                     |
| Yr * Village               |                     |                     |                     | 0.73<br>(0.68,0.79) |                     |                     |                     |                      | 0.98<br>(0.91,1.05)  |                     |
| Yr *SC                     |                     |                     |                     |                     | 0.99<br>(0.92,1.05) |                     |                     |                      |                      | 0.99<br>(0.93,1.06) |
| Yr *ST                     |                     |                     |                     |                     | 0.97<br>(0.9,1.05)  |                     |                     |                      |                      | 0.84<br>(0.78,0.91) |

1  
2  
3  
4  
5  
6  
7  
8  
9  
10  
11  
12  
13  
14  
15  
16  
17  
18  
19  
20  
21  
22  
23  
24  
25  
26  
27  
28  
29  
30  
31  
32  
33  
34  
35  
36  
37  
38  
39  
40  
41  
42  
43  
44  
45  
46  
47  
48  
49

|                                              |  |                     |                    |                    |                     |  |                     |                     |                     |                     |
|----------------------------------------------|--|---------------------|--------------------|--------------------|---------------------|--|---------------------|---------------------|---------------------|---------------------|
| Yr*OBC                                       |  |                     |                    |                    | 0.92<br>(0.87,0.97) |  |                     |                     |                     | 0.92<br>(0.87,0.97) |
| Yr*No Caste                                  |  |                     |                    |                    | 1.07<br>(0.94,1.21) |  |                     |                     |                     | 1.15<br>(1.02,1.29) |
| <b>Fixed Part of the Model</b>               |  |                     |                    |                    |                     |  |                     |                     |                     |                     |
| Joint Chi Test for Interaction (p-value)     |  | 174.31<br>(p<0.001) | 13.31<br>(p=0.009) | 13.44<br>(p=0.003) | 0.318<br>(p=0.98)   |  | 15.63<br>(p=0.003)  | 8.52<br>(p=0.074)   | 2.6<br>(p=0.46)     | 1.387<br>(p=0.85)   |
| <b>Random Part of the Model</b>              |  |                     |                    |                    |                     |  |                     |                     |                     |                     |
| Chi square for Level 3: State (p-value)      |  | 12.82<br>(p=0.003)  | 12.82<br>(p=0.003) | 12.82<br>(p=0.003) | 12.82<br>(p=0.003)  |  | 12.89<br>(p=0.0003) | 12.89<br>(p=0.0003) | 12.89<br>(p=0.0003) | 12.89<br>(p=0.0003) |
| Chi square for Level 2: Local Area (p-value) |  | 650.41<br>(p<0.001) | 655.7<br>(p<0.001) | 654.2<br>(p<0.001) | 660.7<br>(p<0.001)  |  | 801.6<br>(p<0.001)  | 802.4<br>(p<0.001)  | 802.4<br>(p<0.001)  | 801.7<br>(p<0.001)  |

\*Models are controlled for age (centered at 29 years), marital status and religion

**Table 2: Pooled Regression Models showing Odds Ratios (95% CIs) for Smoking and Chewing among women and interactions for wealth, education, residence and caste over time.**

| Covariates                             | Smoking                |                                        |                                              |                                                       |                                       | Chewing                |                                        |                                              |                                                       |                                       |
|----------------------------------------|------------------------|----------------------------------------|----------------------------------------------|-------------------------------------------------------|---------------------------------------|------------------------|----------------------------------------|----------------------------------------------|-------------------------------------------------------|---------------------------------------|
|                                        | Model 1:<br>Full Model | Model 2:<br>Interaction<br>with Wealth | Model 3:<br>Interaction<br>with<br>Education | Model 4:<br>Interaction with<br>Living<br>Environment | Model 5:<br>Interaction<br>with Caste | Model 1:<br>Full Model | Model 2:<br>Interaction<br>with Wealth | Model 3:<br>Interaction<br>with<br>Education | Model 4:<br>Interaction with<br>Living<br>Environment | Model 5:<br>Interaction<br>with Caste |
| <b>Wealth Quintiles (Richest)</b>      | 1.00                   | 1.00                                   | 1.00                                         | 1.00                                                  | 1.00                                  | 1.00                   | 1.00                                   | 1.00                                         | 1.00                                                  | 1.00                                  |
| Richer                                 | 1.48<br>(1.28,1.71)    | 1.82<br>(1.49,2.22)                    | 1.48<br>(1.28,1.71)                          | 1.48 (1.28,1.71)                                      | 1.49<br>(1.29,1.72)                   | 1.48<br>(1.41,1.56)    | 1.41<br>(1.32,1.51)                    | 1.48<br>(1.4,1.55)                           | 1.51 (1.43,1.59)                                      | 1.48<br>(1.41,1.56)                   |
| Middle                                 | 1.9<br>(1.64,2.19)     | 2.63<br>(2.17,3.19)                    | 1.87<br>(1.62,2.16)                          | 1.88 (1.62,2.18)                                      | 1.9 (1.64,2.19)                       | 1.75<br>(1.66,1.85)    | 1.58 (1.47,1.7)                        | 1.75<br>(1.65,1.84)                          | 1.81 (1.72,1.92)                                      | 1.76<br>(1.66,1.85)                   |
| Poorer                                 | 2.75<br>(2.37,3.19)    | 3.72<br>(3.07,5.52)                    | 2.8<br>(2.41,3.25)                           | 2.81 (2.42,3.26)                                      | 2.85<br>(2.45,3.30)                   | 2.14<br>(2.02,2.27)    | 1.86<br>(1.72,2.002)                   | 2.13<br>(2.01,2.25)                          | 2.2 (2.07,2.32)                                       | 2.14<br>(2.02,2.27)                   |
| Poorest                                | 3.95<br>(3.39,4.6)     | 4.83<br>(3.97,5.88)                    | 4.03<br>(3.46,4.69)                          | 4.05 (3.47,4.72)                                      | 4.08 (3.5,4.75)                       | 2.67<br>(2.5,2.84)     | 2.14<br>(1.99,2.32)                    | 2.65<br>(2.49,2.82)                          | 2.7 (2.54,2.88)                                       | 2.7 (2.5,2.84)                        |
| <b>Education (Post graduate)</b>       | 1.00                   | 1.00                                   | 1.00                                         | 1.00                                                  | 1.00                                  | 1.00                   | 1.00                                   | 1.00                                         | 1.00                                                  | 1.00                                  |
| College                                | 1.59<br>(0.91,2.8)     | 1.61<br>(0.92,2.82)                    | 0.98<br>(0.37,2.58)                          | 1.58 (0.9,2.78)                                       | 1.57 (0.9,2.75)                       | 1.84<br>(1.55,2.19)    | 1.83<br>(1.54,2.17)                    | 1.1<br>(0.85,1.42)                           | 1.82 (1.53,2.17)                                      | 1.84<br>(1.55,2.19)                   |
| High School                            | 1.78<br>(1.06,2.99)    | 1.67<br>(1.01,,2.82)                   | 1.95<br>(0.83,4.56)                          | 1.62 (0.96,2.72)                                      | 1.61 (0.99,2.7)                       | 2.19<br>(1.86,2.57)    | 2.13<br>(1.82,2.51)                    | 1.47<br>(1.17,1.85)                          | 2.15 (1.82,2.54)                                      | 2.21<br>(1.88,2.6)                    |
| Primary                                | 2.78<br>(1.66,4.68)    | 2.62<br>(1.56,4.41)                    | 3.32<br>(1.42,7.76)                          | 2.54 (1.51,4.29)                                      | 2.52 (1.5,4.24)                       | 2.87<br>(2.44,3.4)     | 2.83 (2.4,3.33)                        | 2.03<br>(1.61,2.56)                          | 2.86 (2.42,3.37)                                      | 2.89<br>(2.45,3.41)                   |
| No education                           | 4.78<br>(2.84,8.04)    | 4.91<br>(2.93,8.23)                    | 6.89<br>(2.53,13.73)                         | 4.72 (2.81,7.93)                                      | 4.66<br>(2.77,7.81)                   | 3.85<br>(3.27,4.53)    | 3.75<br>(3.19,4.42)                    | 2.58<br>(2.04,3.24)                          | 3.8 (3.22,4.48)                                       | 3.85<br>(3.27,4.53)                   |
| <b>Living Environment (Large city)</b> | 1.00                   | 1.00                                   | 1.00                                         | 1.00                                                  | 1.00                                  | 1.00                   | 1.00                                   | 1.00                                         | 1.00                                                  | 1.00                                  |
| Small City                             | 0.91<br>(0.75,1.09)    | 0.98 (0.82,<br>1.17)                   | 1.01<br>(0.84,1.21)                          | 0.78 (0.58,1.04)                                      | 1.004<br>(0.84,1.2)                   | 1.23<br>(1.13,1.32)    | 1.25<br>(1.15,1.35)                    | 1.22<br>(1.13,1.32)                          | 0.97 (0.86,1.1)                                       | 1.2<br>(1.11,1.29)                    |
| Town                                   | 1.19<br>(1.03,1.37)    | 1.2 (1.04,1.38)                        | 1.22<br>(1.05,1.4)                           | 1.31 (1.06,1.62)                                      | 1.23 (1.1,1.41)                       | 1.36<br>(1.27,1.45)    | 1.37<br>(1.29,1.47)                    | 1.36<br>(1.27,1.45)                          | 0.95 (0.86,1.04)                                      | 1.34<br>(1.25,1.43)                   |
| Village                                | 1.4<br>(1.24,1.59)     | 1.28<br>(1.13,1.46)                    | 1.31<br>(1.16,1.49)                          | 1.37 (1.14,1.66)                                      | 1.32<br>(1.16,1.49)                   | 1.07<br>(1.01,1.14)    | 1.09<br>(1.02,1.16)                    | 1.08<br>(1.02,1.15)                          | 0.69 (0.64,0.75)                                      | 1.07<br>(1.005,1.13)                  |
| <b>Caste/Tribe</b>                     | 1.00                   | 1.00                                   | 1.00                                         | 1.00                                                  | 1.00                                  | 1.00                   | 1.00                                   | 1.00                                         | 1.00                                                  | 1.00                                  |

1  
2  
3  
4  
5  
6  
7  
8  
9  
10  
11  
12  
13  
14  
15  
16  
17  
18  
19  
20  
21  
22  
23  
24  
25  
26  
27  
28  
29  
30  
31  
32  
33  
34  
35  
36  
37  
38  
39  
40  
41  
42  
43  
44  
45  
46  
47  
48  
49

|                                 |                     |                      |                     |                     |                     |                     |                     |                     |                       |                     |
|---------------------------------|---------------------|----------------------|---------------------|---------------------|---------------------|---------------------|---------------------|---------------------|-----------------------|---------------------|
| (Other)                         |                     |                      |                     |                     |                     |                     |                     |                     |                       |                     |
| SC                              | 1.5<br>(1.39,1.62)  | 1.55<br>(1.43,1.67)  | 1.54<br>(1.43,1.67) | 1.54 (1.43,1.67)    | 1.4 (1.27,1.55)     | 1.28<br>(1.23,1.33) | 1.28<br>(1.23,1.36) | 1.28<br>(1.23,1.33) | 1.29 (1.24,1.34)      | 1.28<br>(1.22,1.35) |
| ST                              | 2.04<br>(1.86,2.24) | 2.11 (1.92,<br>2.3)  | 2.11<br>(1.93,2.31) | 2.11 (1.93,2.31)    | 1.99<br>(1.79,2.23) | 1.53<br>(1.46,1.6)  | 1.53<br>(1.46,1.61) | 1.53<br>(1.46,1.61) | 1.52 (1.45,1.6)       | 1.48<br>(1.39,1.58) |
| OBC                             | 1.11<br>(1.03,1.2)  | 1.17<br>(1.08,1.26)  | 1.16<br>(1.08,1.26) | 1.16 (1.08,1.25)    | 1.13<br>(1.03,1.24) | 1.03<br>(0.99,1.07) | 1.03<br>(0.99,1.07) | 1.03<br>(0.99,1.07) | 1.03 (0.99,1.07)      | 1.06<br>(1.02,1.12) |
| No Caste or missing             | 0.7<br>(0.6,0.81)   | 0.74<br>(0.64,0.86)  | 0.72<br>(0.62,0.85) | 0.73 (0.62,0.85)    | 1.01 (0.85,1.2)     | 1.02<br>(0.95,1.09) | 1.02<br>(0.96,1.09) | 1.02<br>(0.95,1.09) | 1.01 (0.95,1.08)      | 0.92<br>(0.85,1.01) |
| <b>Survey Year (Yr)</b>         |                     | 1.004<br>(0.98,1.03) | 0.89<br>(0.31,2.56) | 0.67 (0.55,0.83)    | 0.57<br>(0.51,0.63) |                     | 0.81<br>(0.75,0.87) | 0.54<br>(0.4,0.74)  | 0.52 (0.47,0.56)      | 1.02<br>(0.97,1.07) |
| Yr*Richer                       |                     | 0.66 (0.5,0.87)      |                     |                     |                     |                     | 1.09<br>(0.99,1.21) |                     |                       |                     |
| Yr*Middle                       |                     | 0.47<br>(0.36,0.61)  |                     |                     |                     |                     | 1.21 (1.1,1.34)     |                     |                       |                     |
| Yr *Poorer                      |                     | 0.56<br>(0.44,0.72)  |                     |                     |                     |                     | 1.3 (1.18,1.43)     |                     |                       |                     |
| Yr *Poorest                     |                     | 0.71<br>(0.56,0.91)  |                     |                     |                     |                     | 1.5 (1.37,1.64)     |                     |                       |                     |
| Yr *College                     |                     |                      | 1.98<br>(0.6,6.52)  |                     |                     |                     |                     | 2.26<br>(1.6,3.21)  |                       |                     |
| Yr * High School                |                     |                      | 0.77<br>(0.26,2.22) |                     |                     |                     |                     | 1.94<br>(1.41,2.67) |                       |                     |
| Yr * Primary                    |                     |                      | 0.61<br>(0.21,1.75) |                     |                     |                     |                     | 1.74<br>(1.27,2.4)  |                       |                     |
| Yr * No education               |                     |                      | 0.7 (0.24,2.0)      |                     |                     |                     |                     | 1.94<br>(1.41,2.66) |                       |                     |
| Yr*Small City                   |                     |                      |                     | 1.44 (0.99,2.07)    |                     |                     |                     |                     | 1.61 (1.38,1.88)      |                     |
| Yr * Town                       |                     |                      |                     | 0.89 (0.68,1.16)    |                     |                     |                     |                     | 1.94 (1.72,2.19)      |                     |
| Yr * Village                    |                     |                      |                     | 0.92 (0.74,1.15)    |                     |                     |                     |                     | 2.26 (2.06,2.48)      |                     |
| Yr *SC                          |                     |                      |                     |                     | 1.29<br>(1.11,1.51) |                     |                     |                     |                       | 0.99<br>(0.93,1.07) |
| Yr *ST                          |                     |                      |                     |                     | 1.16<br>(0.99,1.36) |                     |                     |                     |                       | 1.07<br>(0.98,1.16) |
| Yr*OBC                          |                     |                      |                     |                     | 1.1 (0.96,1.27)     |                     |                     |                     |                       | 0.95<br>(0.89,1.01) |
| Yr*No Caste                     |                     |                      |                     |                     | 0.45<br>(0.32,0.63) |                     |                     |                     |                       | 1.22<br>(1.07,1.38) |
| <b>Fixed Part of the Model</b>  |                     |                      |                     |                     |                     |                     |                     |                     |                       |                     |
| Overall Chi for Interaction (p- |                     | 19.128<br>(p<0.001)  | 0.041<br>(p=0.99)   | 50.195<br>(p<0.001) | 0.992 (p=0.91)      |                     | 31.96<br>(p<0.0001) | 17.42<br>(p=0.001)  | 157.008<br>(p<0.0001) | 2.665<br>(p=0.615)  |



|                                              |  |                  |                 |                 |                 |  |                   |                  |                   |                   |
|----------------------------------------------|--|------------------|-----------------|-----------------|-----------------|--|-------------------|------------------|-------------------|-------------------|
| value)                                       |  |                  |                 |                 |                 |  |                   |                  |                   |                   |
| <b>Random Part of the Model</b>              |  |                  |                 |                 |                 |  |                   |                  |                   |                   |
| Chi square for Level 3: State (p-value)      |  | 12.91 (p=0.011)  | 12.91 (p=0.011) | 12.91 (p=0.004) | 12.91 (p=0.011) |  | 12.94 (p=0.011)   | 12.94 (p=0.011)  | 12.94 (p=0.004)   | 12.94 (p=0.011)   |
| Chi square for Level 2: Local Area (p-value) |  | 260.98 (p<0.001) | 266.3 (p<0.001) | 264.9 (p<0.001) | 263.5 (p<0.001) |  | 844.91 (p<0.0001) | 839.3 (p<0.0001) | 824.92 (p<0.0001) | 837.64 (p<0.0001) |

\*Models are controlled for age (centered at 29 years), marital status and religion

For peer review only

1  
2  
3  
4  
5  
6  
7  
8  
9  
10  
11  
12  
13  
14  
15  
16  
17  
18  
19  
20  
21  
22  
23  
24  
25  
26  
27  
28  
29  
30  
31  
32  
33  
34  
35  
36  
37  
38  
39  
40  
41  
42  
43  
44  
45  
46  
47  
48  
49

Table 3: Frequency and prevalence of tobacco smoking, chewing and dual use (smoking and chewing) in the National Family Health Surveys 1998-99 and 2005-6

|                          | Sample Population        |                          | MEN                     |                         |         |                         |                              |         | FEMALE                  |                              |                         |                         |     |                         |                         |     |                          |                         |
|--------------------------|--------------------------|--------------------------|-------------------------|-------------------------|---------|-------------------------|------------------------------|---------|-------------------------|------------------------------|-------------------------|-------------------------|-----|-------------------------|-------------------------|-----|--------------------------|-------------------------|
|                          | 1998-9                   | 2005-6                   | SMOKE                   |                         |         | CHEW                    |                              |         | DUAL                    |                              | SMOKE                   |                         |     | CHEW                    |                         |     | DUAL                     |                         |
|                          | 1998-9                   | 2005-6                   | 1998-9                  | 2005-6                  | % Δ     | 1998-9                  | 2005-6                       | % Δ     | 1998-9                  | 2005-6                       | 1998-9                  | 2005-6                  | % Δ | 1998-9                  | 2005-6                  | % Δ | 1998-9                   | 2005-6                  |
| <b>Area of residence</b> |                          |                          |                         |                         |         |                         |                              |         |                         |                              |                         |                         |     |                         |                         |     |                          |                         |
| <i>Large city</i>        | (M) 17,640<br>(F) 16,081 | (M) 19,092<br>(F) 26,272 | 17.7<br>(16.6,<br>18.9) | 27.2<br>(25.7,<br>28.8) | 54      | 19.1<br>(17.4,21<br>.1) | 30.3<br>(28.2,<br>32.5)      | 59      | 6.05<br>(5.4,6<br>.8)   | 10.2<br>(9.2,<br>11.3)       | 0.3(0.2<br>, 0.4)       | 0.4<br>(0.3,0.<br>6)    | 33  | 5.8<br>(4.9,6.9<br>)    | 4.9<br>(4.1,5.<br>9)    | -16 | 0.09<br>(0.06,0<br>.14)  | 0.055<br>(0.03,0<br>.1) |
| <i>Small city</i>        | (M) 8,957<br>(F) 8,573   | (M) 4,723<br>(F) 9,318   | 18.3<br>(16.4,2<br>0.2) | 28.8<br>(26.5,<br>31.2) | 57      | 19.4<br>(17.1,<br>22.0) | 34.2<br>(31.1,<br>37.4)      | 76      | 5.8<br>(4.95,<br>6.8)   | 10.9<br>(9.6,<br>12.5)       | 0.3<br>(0.2,0.<br>5)    | 0.5<br>(0.35,0<br>.7)   | 67  | 5.9<br>(4.8,7.1<br>)    | 6.6<br>(5.5,8.<br>1)    | 12  | 0.06<br>(0.03,0<br>.14)  | 0.09<br>(0.04,0<br>.2)  |
| <i>Town</i>              | (M) 18,837<br>(F) 18,803 | (M) 12,078<br>(F) 21,256 | 19.9<br>(18.6,2<br>1.2) | 30.3<br>(28.4,<br>32.2) | 52      | 20.6<br>(18.7,22<br>.5) | 31.1<br>(28.6,<br>33.7)      | 51      | 6.3<br>(5.6,7<br>.1)    | 10.5<br>(9.4,<br>11.7)       | 0.6<br>(0.5,0.<br>8)    | 0.6<br>(0.4,0.<br>8)    | 0   | 6.7<br>(5.8,7.8<br>)    | 7.2<br>(6.1,8.<br>4)    | 8   | 0.2<br>(0.15,0<br>.3)    | 0.1<br>(0.07,0<br>.2)   |
| <i>Village</i>           | (M) 86,030<br>(F) 87,429 | (M) 33,862<br>(F) 67,296 | 28.9<br>(28.2,2<br>9.6) | 35.2<br>(34.2,<br>36.2) | 22      | 28.2<br>(27.4,28<br>.9) | 40.9<br>(39.8,<br>41.9)      | 45      | 11.4<br>(10.9,<br>11.8) | 15.0<br>(14.<br>3,15<br>.7)  | 2.04<br>(1.85,2<br>.24) | 1.98<br>(1.75,2<br>.24) | -3  | 9.8<br>(9.3,10.<br>3)   | 11.3<br>(10.6,1<br>1.9) | 15  | 0.5<br>(0.43,0<br>.6)    | 0.4<br>(0.3,0.<br>5)    |
| <b>Age-groups</b>        |                          |                          |                         |                         |         |                         |                              |         |                         |                              |                         |                         |     |                         |                         |     |                          |                         |
| <i>15-24</i>             | (M) 50,266<br>(F) 52,299 | (M) 25,511<br>(F) 46,688 | 8.6<br>(8.2,<br>9.1)    | 19.2<br>(18.4,<br>20.1) | 12<br>3 | 14.3<br>(13.7,<br>14.9) | 30.3<br>(29.2<br>7,31.<br>4) | 11<br>2 | 3.5<br>(3.3,3<br>.8)    | 9.45<br>(8.9,<br>10.1)       | 0.4<br>(0.31,0<br>.45)  | 0.3<br>(0.21,0<br>.36)  | -25 | 3.1<br>(2.8,3.3<br>)    | 4.4<br>(3.99,4<br>.7)   | 42  | 0.098<br>(0.07,0<br>.14) | 0.08<br>(0.05,0<br>.13) |
| <i>25-34</i>             | (M) 38,650<br>(F) 40,764 | (M) 20,794<br>(F) 38,441 | 29.1<br>(28.3,<br>29.9) | 36.3<br>(35.2,<br>37.4) | 25      | 29.9<br>(29.1,<br>30.7) | 43.1<br>(41.9,<br>44.3)      | 44      | 11.5<br>(10.9,<br>12.0) | 16.0<br>(15.<br>2,16<br>.8)  | 1.4<br>(1.26,1<br>.62)  | 1.3<br>(1.1,1.<br>56)   | -7  | 9.0<br>(8.5,9.5<br>)    | 10.1<br>(9.45,1<br>0.7) | 12  | 0.33<br>(0.27,0<br>.4)   | 0.23<br>(0.2,0.<br>3)   |
| <i>35-49</i>             | (M) 42,548<br>(F) 37,823 | (M) 23,450<br>(F) 39,013 | 43.4<br>(42.5,<br>44.2) | 44.1<br>(42.9,<br>45.2) | 1.6     | 35.3<br>(34.4,<br>36.2) | 40.2<br>(39.0<br>2,41.<br>3) | 14      | 15.7<br>(15.1,<br>16.3) | 15.2<br>(14.<br>4,16<br>.01) | 3.4<br>(3.1,3.<br>8)    | 3.2<br>(2.84,3<br>.57)  | -6  | 16.5<br>(15.8,17<br>.3) | 15.7<br>(14.9,1<br>6.4) | -5  | 0.9<br>(0.76,1<br>.02)   | 0.6<br>(0.5,0.<br>7)    |
| <b>Marital Status</b>    |                          |                          |                         |                         |         |                         |                              |         |                         |                              |                         |                         |     |                         |                         |     |                          |                         |
| <i>Currently married</i> | (M) 77,233<br>(F) 95,398 | (M) 40,529<br>(F) 87,754 | 36.9<br>(36.2,3<br>7.6) | 40.6<br>(39.7,<br>41.5) | 10      | 33.7<br>(32.9,<br>34.4) | 42.9<br>(41.9,<br>43.9)      | 27      | 13.9<br>(13.5,<br>14.4) | 15.9<br>(15.<br>3,16<br>.6)  | 1.8<br>(1.6,<br>1.94)   | 1.8<br>(1.6,2.<br>02)   | 0   | 9.8<br>(9.3,10.<br>3)   | 10.9<br>(10.4,1<br>1.5) | 11  | 0.43<br>(0.37,0<br>.5)   | 0.3<br>(0.26,0<br>.4)   |

|                                          |                                  |                                 |                         |                          |         |                          |                              |         |                         |                             |                       |                         |     |                         |                          |     |                         |                         |
|------------------------------------------|----------------------------------|---------------------------------|-------------------------|--------------------------|---------|--------------------------|------------------------------|---------|-------------------------|-----------------------------|-----------------------|-------------------------|-----|-------------------------|--------------------------|-----|-------------------------|-------------------------|
| <i>Single</i>                            | (M) 52,443<br>(F) 29,623         | (M) 28,377<br>(F) 30,606        | 7.6<br>(7.3,<br>8.04)   | 18.9<br>(18.2,<br>19.7)  | 14<br>9 | 12.5<br>(11.9,12<br>.9)  | 27.4<br>(26.4,<br>28.4)      | 11<br>9 | 2.9<br>(2.7,3<br>.2)    | 8.6<br>(8.1,<br>9.2)        | 0.3<br>(0.22,0<br>.4) | 0.09<br>(0.06,0<br>.14) | -70 | 1.9<br>(1.8,2.2<br>)    | 2.8<br>(2.5,3.<br>2)     | 47  | 0.12<br>(0.08,0<br>.18) | 0.03<br>(0.01,0<br>.06) |
| <i>Widow<br/>d</i>                       | (M) 1,070<br>(F) 4,038           | (M) 415<br>(F) 3,909            | 48.7<br>(45.1,5<br>2.3) | 50.1<br>(43.9,<br>56.3)  | 2.8     | 41.6<br>(38.0,45<br>.3)  | 59.5<br>(53.2,<br>65.6)      | 43      | 19.5<br>(16.8,<br>22.5) | 23.7<br>(18.<br>7,29<br>.6) | 4.7<br>(3.86,<br>5.6) | 3.5<br>(2.78,4<br>.3)   | -26 | 21.3<br>(19.7,22<br>.9) | 18.5<br>(16.9,2<br>0.2)  | -13 | 1.4<br>(1.05,1<br>.89)  | 0.9<br>(0.6,1.<br>4)    |
| <i>Divorce<br/>d/<br/>separat<br/>ed</i> | (M) 718<br>(F) 1,827             | (M) 434<br>(F) 1,873            | 41.7<br>(37.2,4<br>6.4) | 46.6<br>(39.9,<br>53.3)  | 12      | 33.4<br>(29.01,<br>38.1) | 55.9<br>(49.0<br>3,62.<br>7) | 67      | 15.7<br>(12.5,<br>19.5) | 25.2<br>(19.<br>7,31<br>.6) | 2.5<br>(1.8,3.<br>6)  | 1.6<br>(1.01,2<br>.6)   | -36 | 18.1<br>(15.9,20<br>.6) | 18.6<br>(16.4,<br>21.01) | 3   | 0.31<br>(0.13,0<br>.75) | 0.6<br>(0.3,1.<br>2)    |
| <b>Religion</b>                          |                                  |                                 |                         |                          |         |                          |                              |         |                         |                             |                       |                         |     |                         |                          |     |                         |                         |
| <i>Hindu</i>                             | (M) 100,339<br>(F) 99,430        | (M) 51,174<br>(F) 89,888        | 26.1<br>(25.5,2<br>6.7) | 33.01<br>(32.2,<br>33.8) | 27      | 26.6<br>(26.0,<br>27.3)  | 38.2<br>(37.3,<br>39.1)      | 44      | 10.2<br>(9.8,1<br>0.5)  | 13.7<br>(13.<br>2,14<br>.3) | 1.5<br>(1.4,1.<br>7)  | 1.5<br>(1.35,1<br>.7)   | 0   | 8.8<br>(8.3,9.2<br>)    | 9.6<br>(9.1,10<br>.2)    | 9   | 0.37<br>(0.31,0<br>.43) | 0.25<br>(0.2,0.<br>3)   |
| <i>Muslim</i>                            | (M) 16,278<br>(F) 16,215         | (M) 9,145<br>(F) 16,731         | 28.3<br>(26.7,2<br>9.9) | 36.2<br>(34.3,<br>38.2)  | 28      | 23.4<br>(21.7,25<br>.1)  | 37.4<br>(35.0<br>2,39.<br>8) | 60      | 9.5<br>(8.7,1<br>0.5)   | 13.1<br>(11.<br>9,14<br>.5) | 1.9<br>(1.6,2.<br>3)  | 1.73<br>(1.25,2<br>.4)  | -9  | 9.1<br>(8.3,9.9<br>)    | 9.9<br>(8.9,10<br>.9)    | 9   | 0.5<br>(0.37,0<br>.7)   | 0.4<br>(0.3,0.<br>7)    |
| <i>Christia<br/>n</i>                    | (M) 8,055<br>(F) 8,547           | (M) 6,250<br>(F) 10,974         | 28.2<br>(25.9,3<br>0.5) | 33.1<br>(29.9,<br>36.4)  | 17      | 17.5<br>(15.1,<br>20.1)  | 29.1<br>(25.0<br>1,33.<br>5) | 66      | 8.2<br>(6.9,9<br>.6)    | 12.7<br>(10.<br>4,15<br>.5) | 2.4<br>(1.7,3.<br>3)  | 1.3<br>(0.98,1<br>.62)  | -46 | 9.9<br>(8.4,11.<br>6)   | 10.7<br>(9.1,12<br>.5)   | 8   | 0.98<br>(0.72,1<br>.33) | 0.6<br>(0.5,0.<br>7)    |
| <i>Others</i>                            | (M) 6,792<br>(F) 6,694           | (M) 3,186<br>(F) 6,549          | 11.1<br>(9.5,12<br>.8)  | 16.2<br>(14.2,<br>18.4)  | 46      | 19.3<br>(17.1,21<br>.7)  | 26.0<br>(23.1,<br>29.2)      | 35      | 4.4<br>(3.4,5<br>.6)    | 6.5<br>(5.2,<br>8.0)        | 0.6<br>(0.4,<br>0.9)  | 0.4<br>(0.2,0.<br>65)   | -33 | 7.5<br>(5.8,9.6<br>)    | 7.6<br>(6.2,9.<br>4)     | 1   | 0.27<br>(0.13,0<br>.55) | 0.2<br>(0.1,0.<br>6)    |
| <i>Total</i>                             | (M)<br>131,464<br>(F)<br>130,886 | (M)<br>69,755<br>(F)<br>124,142 |                         |                          |         |                          |                              |         |                         |                             |                       |                         |     |                         |                          |     |                         |                         |

<sup>1</sup>Large city: urban population ≥1 million; Small city: 100000-1 million; Town: ≤100000 million

<sup>2</sup>Scheduled castes and scheduled tribes are identified by the Government of India as socially and economically backward and needing protection from social injustice and exploitation. Other backward class is a diverse collection of intermediate castes that were considered low in the traditional caste hierarchy but are clearly above scheduled castes. General is thus a default residual group that enjoys higher status in the caste hierarchy.

<sup>3</sup>Others include Sikh, Buddhist, Jain, Jewish, Zoroastrian and Others

<sup>4</sup>Post graduate:15 or more years of education; college: 13-15 years of education; high school: 8-12 years of education; secondary: 5-8 years of education; primary: 0-5 years of education; illiterate: 0 years of education

\*Percentage change (% Δ) numbers have been rounded to the nearest integer. Estimates are not age-standardized

**ACKNOWLEDGEMENTS**

We acknowledge the support of Macro International Inc (Washington, DC) for providing access to the surveys.

**Competing Interests:** None

**Financial Disclosures:** None.

**Funding/Support:** None. NB is supported by the Presidential Scholarship at Harvard University. CM conducted this work during a Study Abroad Fellowship funded by the Leverhulme Trust. CM is also funded by the Higher Education Funding Council for England and the National Institute for Health Research.

For peer review only

**References Cited:**

1. Reddy KS, Prabhakaran D, Jeemon P, Thankappan KR, Joshi P, Chaturvedi V, Ramakrishnan L & Ahmed F. "Educational status and cardiovascular risk profile in Indians." PNAS 104.41 (2007): 16263-16268.
2. Murray CJL, & Lopez, AD. "Global mortality, disability and the contribution of risk factors: Global Burden of Disease Study." The Lancet 349 (1997a): 1436-42.
3. Murray CJL, & Lopez AD. "Alternative projections of mortality and disability by cause 1990-2020: Global Burden of Disease Study." The Lancet 349 (1997b): 1498-1504.
4. Rani M, Bonu S, Jha P, Nguyen S, Jamjoum L. "Tobacco use in India: prevalence and predictors of smoking and chewing in a national cross sectional household survey." Tobacco Control 12.4 (2003): e4.
5. Subramanian SV, Nandy S, Kelly M, Gordon D & Smith GD. "Patterns and distribution of tobacco consumption in India: cross sectional multilevel evidence from the 1998-9 National Family Health Survey." BMJ 328.7443 (2004): 801-6.
6. John RM, Rao RK, Rao MG, Moore J, Deshpande RS, Sengupta J, Selvaraj S, Chaloupka FJ, Jha P. The economics of tobacco and tobacco taxation in India. Paris: International Union against Tuberculosis and Lung Disease, 2010.
7. IIPS, & ORC Macro. National Family Health Survey (NFHS-2), 1998-99. Data. Mumbai, India: IIPS, 2000.
8. IIPS, & ORC Macro. National Family Health Survey (NFHS-3), 2005-06: India: Vol I. Data. Mumbai, India: IIPS, 2007.
9. Lopez AD, Collishaw NE, Piha T. "A descriptive model of the cigarette epidemic in developed countries." Tobacco Control 3 (1994): 242-247.
10. Thun M, Peto R, Boreham J, Lopez AD. "Stages of the cigarette epidemic on entering its second century." Tobacco Control 21 (2011): 96-101.
11. Fernandez E, Garcia M, Schiaffino A, Borrás JM, Nebotm & Segura A. "Smoking initiation and cessation by gender and educational level in Catalonia, Spain." (2002).
12. Dikshit R, Gupta PC, Ramasundarahettige C, et al. (2012). Cancer mortality in India: a nationally representative survey. The Lancet, Mar 28. Epub
13. Ebrahim S, . "Surveillance and Monitoring for Chronic Diseases: A Vital Investment." The National Medical Journal of India. Editorial 22.3 (2011): 129-132.

Figure 1: Percentage change in smoking among men and women by education level and wealth quintiles

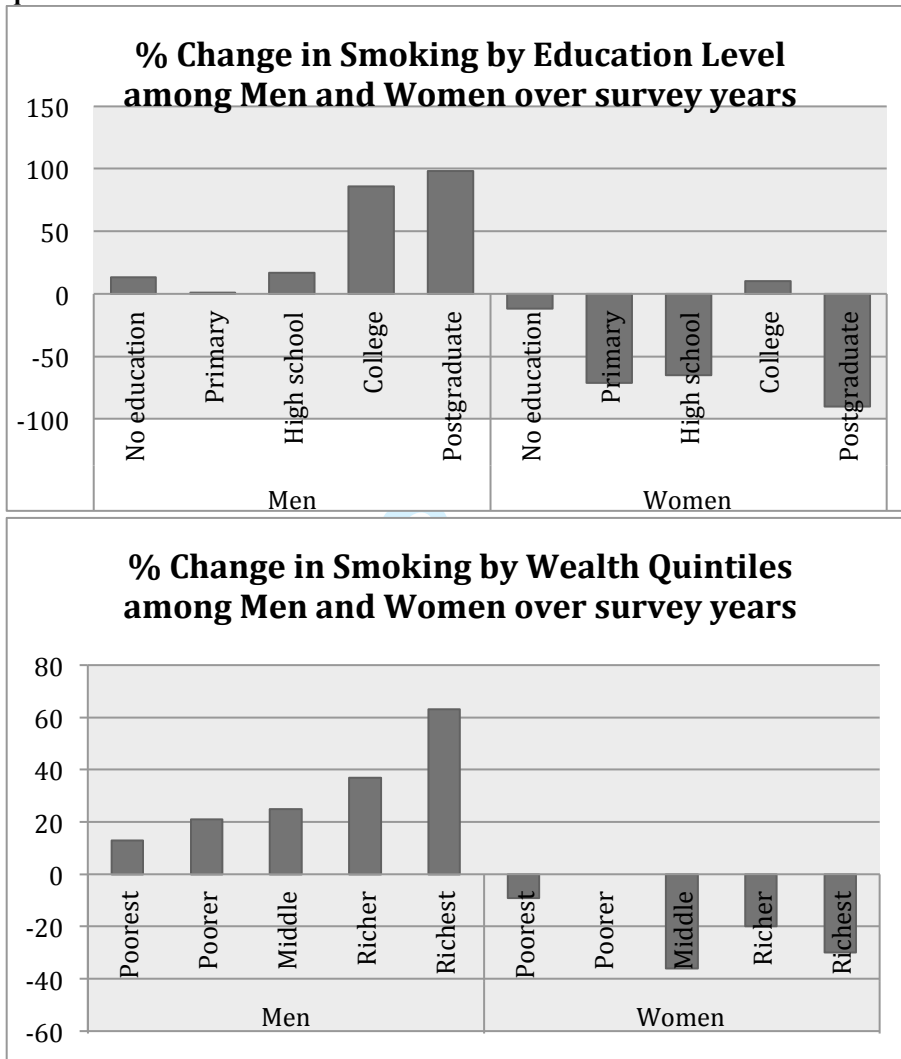

Figure 2: Percentage change in chewing among men and women by education level and wealth quintiles

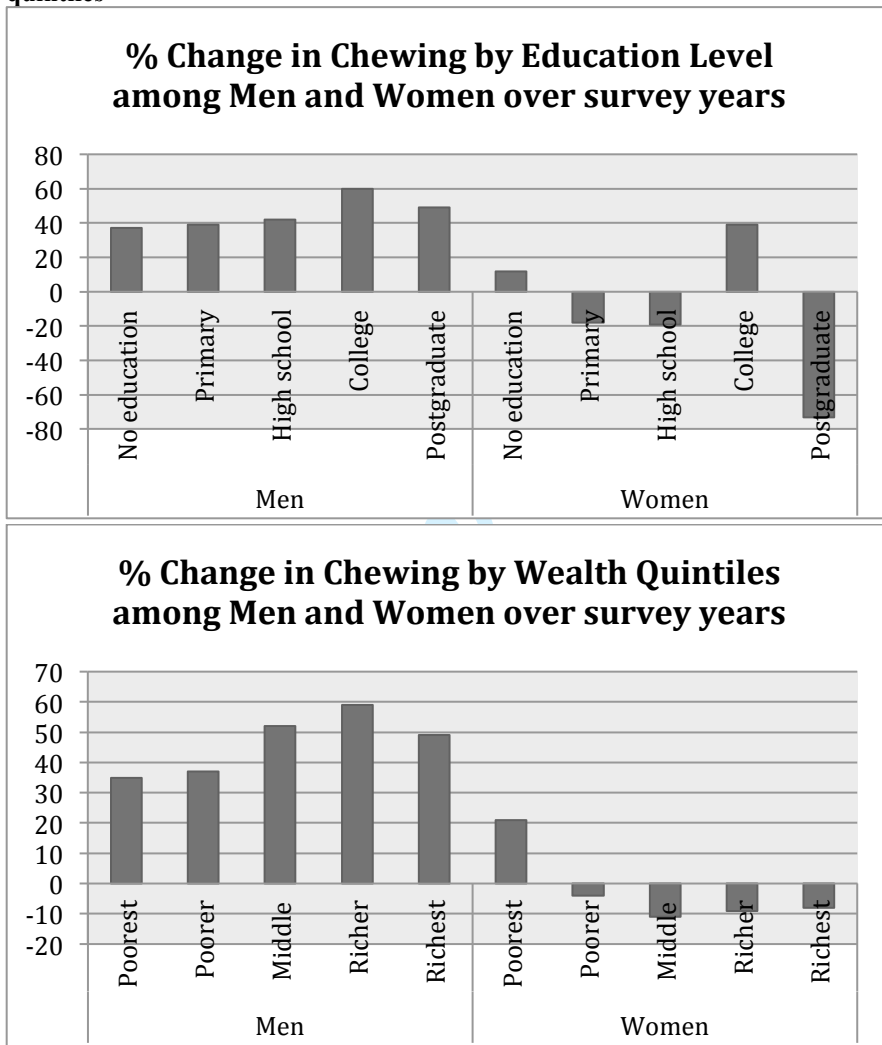

1  
2  
3  
4  
5  
6  
7  
8  
9  
10  
11  
12  
13  
14  
15  
16  
17  
18  
19  
20  
21  
22  
23  
24  
25  
26  
27  
28  
29  
30  
31  
32  
33  
34  
35  
36  
37  
38  
39  
40  
41  
42  
43  
44  
45  
46  
47  
48  
49

Figure 3: Probability of smoking and chewing among men and women by education and wealth

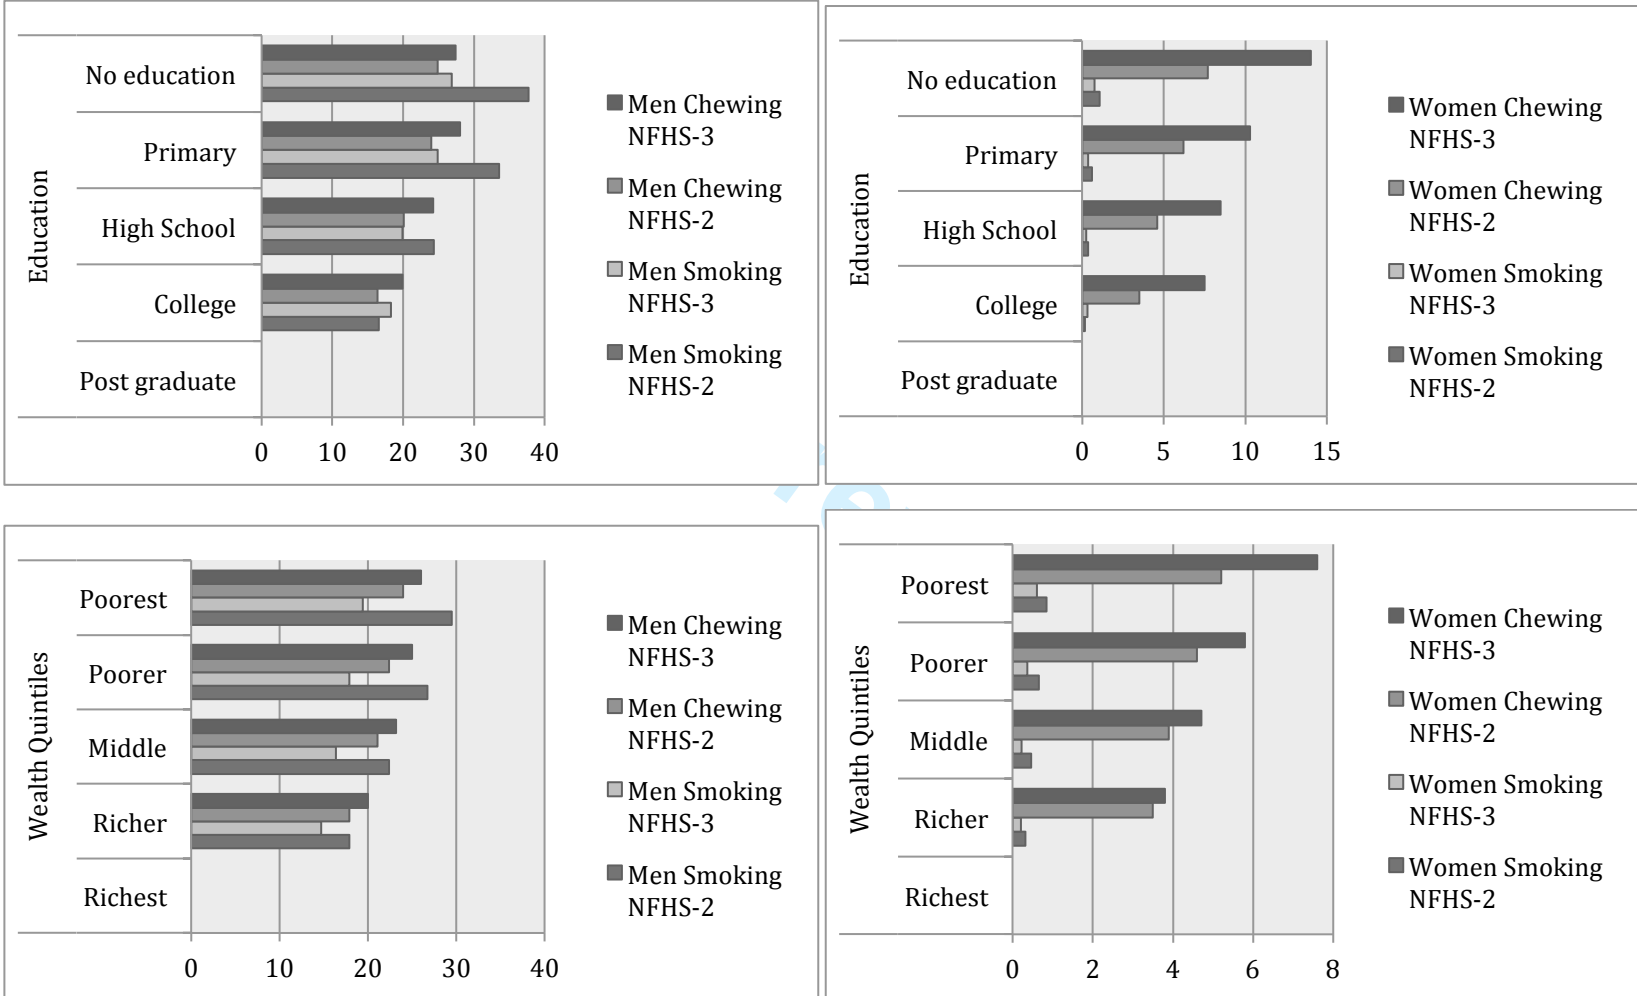



1  
2  
3  
4  
5  
6  
7  
8  
9  
10  
11  
12  
13  
14  
15  
16  
17  
18  
19  
20  
21  
22  
23  
24  
25  
26  
27  
28  
29  
30  
31  
32  
33  
34  
35  
36  
37  
38  
39  
40  
41  
42  
43  
44  
45  
46  
47  
48  
49

For peer review only



**Are socioeconomic disparities in tobacco consumption increasing in India? A repeated cross-sectional multilevel analysis**

|                                 |                                                                                                                                                                                                                                                                                                                                                                                                                                                                                                                                                                                                        |
|---------------------------------|--------------------------------------------------------------------------------------------------------------------------------------------------------------------------------------------------------------------------------------------------------------------------------------------------------------------------------------------------------------------------------------------------------------------------------------------------------------------------------------------------------------------------------------------------------------------------------------------------------|
| Journal:                        | <i>BMJ Open</i>                                                                                                                                                                                                                                                                                                                                                                                                                                                                                                                                                                                        |
| Manuscript ID:                  | bmjopen-2012-001348.R1                                                                                                                                                                                                                                                                                                                                                                                                                                                                                                                                                                                 |
| Article Type:                   | Research                                                                                                                                                                                                                                                                                                                                                                                                                                                                                                                                                                                               |
| Date Submitted by the Author:   | 27-Jul-2012                                                                                                                                                                                                                                                                                                                                                                                                                                                                                                                                                                                            |
| Complete List of Authors:       | Bhan, Nandita; Harvard School of Public Health, Society, Human Development and Health<br>Srivastava, Swati; Public Health Foundation of India,<br>Agrawal, Sutapa; South Asia Network for Chronic Diseases (SANCD),<br>Subramanyam, Malavika; School of Public Health, University of Michigan,<br>Center for Integrative Approaches to Health Disparities<br>Millett, Christopher; Imperial College, Primary Care and Social Medicine<br>Selvaraj, Sakthivel; Public Health Foundation of India,<br>Subramanian, S V; Harvard School of Public Health, Department of<br>Society, Human Development and |
| <b>Primary Subject Heading</b>: | Smoking and tobacco                                                                                                                                                                                                                                                                                                                                                                                                                                                                                                                                                                                    |
| Secondary Subject Heading:      | Global health, Epidemiology, Public health                                                                                                                                                                                                                                                                                                                                                                                                                                                                                                                                                             |
| Keywords:                       | PUBLIC HEALTH, PREVENTIVE MEDICINE, SOCIAL MEDICINE, Epidemiology < THORACIC MEDICINE                                                                                                                                                                                                                                                                                                                                                                                                                                                                                                                  |
|                                 |                                                                                                                                                                                                                                                                                                                                                                                                                                                                                                                                                                                                        |

SCHOLARONE™  
Manuscripts

1  
2  
3  
4  
5  
6  
7  
8  
9  
10  
11  
12  
13  
14  
15  
16  
17  
18  
19  
20  
21  
22  
23  
24  
25  
26  
27  
28  
29  
30  
31  
32  
33  
34  
35  
36  
37  
38  
39  
40  
41  
42  
43  
44  
45  
46  
47  
48  
49  
50  
51  
52  
53  
54  
55  
56  
57  
58  
59  
60

Figure 1: Percentage change in smoking among men and women by education level and wealth quintiles

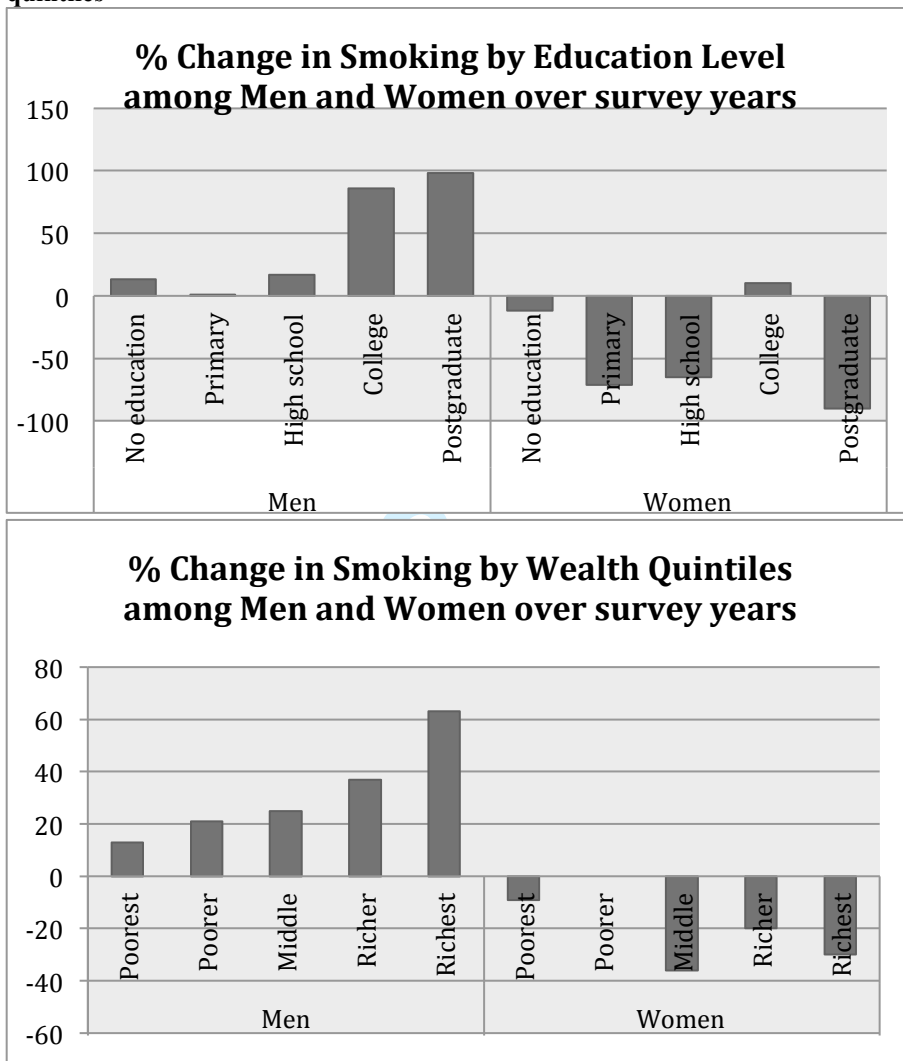

Figure 2: Percentage change in chewing among men and women by education level and wealth quintiles

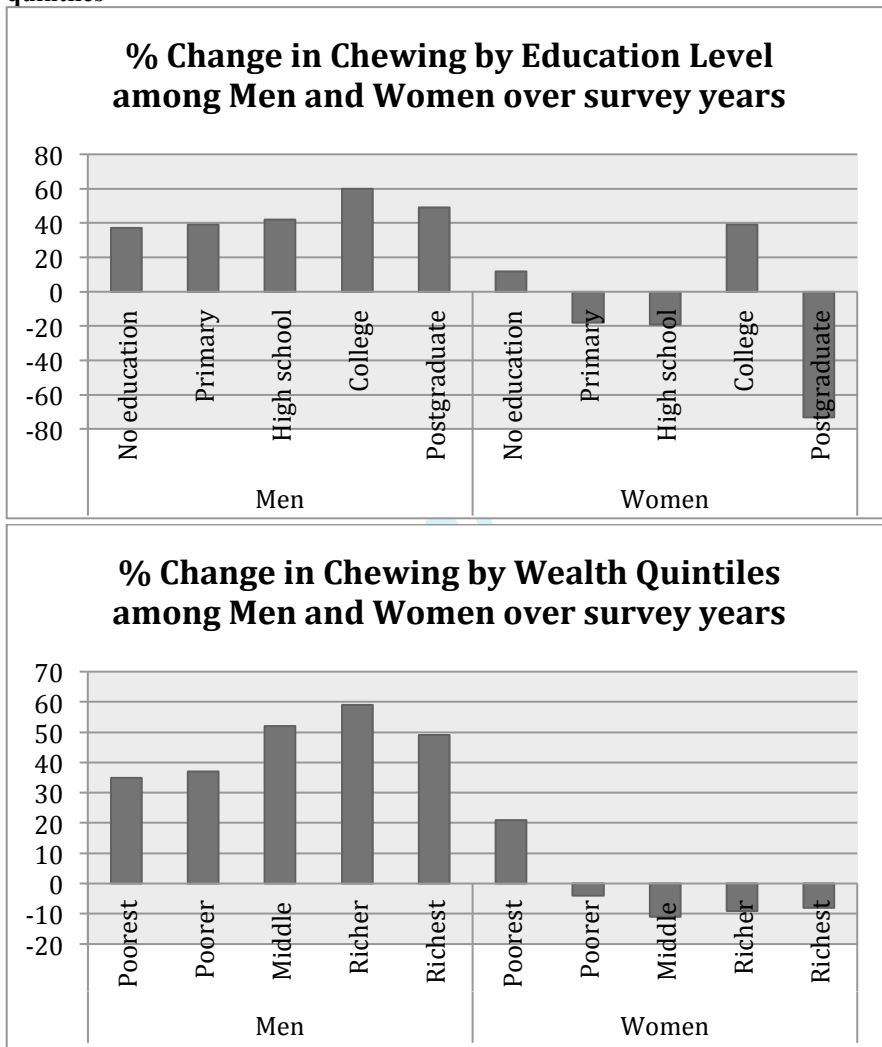

1  
2  
3  
4  
5  
6  
7  
8  
9  
10  
11  
12  
13  
14  
15  
16  
17  
18  
19  
20  
21  
22  
23  
24  
25  
26  
27  
28  
29  
30  
31  
32  
33  
34  
35  
36  
37  
38  
39  
40  
41  
42  
43  
44  
45  
46  
47  
48  
49

Figure 3: Probability of smoking and chewing among men and women by education and wealth



1  
2  
3  
4  
5  
6  
7  
8  
9  
10  
11  
12  
13  
14  
15  
16  
17  
18  
19  
20  
21  
22  
23  
24  
25  
26  
27  
28  
29  
30  
31  
32  
33  
34  
35  
36  
37  
38  
39  
40  
41  
42  
43  
44  
45  
46  
47  
48  
49

For peer review only

1  
2  
3  
4  
5  
6 *Are socioeconomic disparities in tobacco consumption increasing*  
7 *in India? A repeated cross-sectional multilevel analysis*  
8  
9

10  
11  
12 **Corresponding Author:**  
13

14 SV Subramanian

15 Professor of Population Health and Geography Department of Society, Human  
16 Development and Health, Harvard School of Public Health

17 7<sup>th</sup> Floor, Kresge Building, 677 Huntington Ave, Boston MA 02115, USA

18 Phone: +1 617 432 6299

19 Fax: +1 617 432 3123

20 Email: [svsubram@hsph.harvard.edu](mailto:svsubram@hsph.harvard.edu)  
21  
22  
23  
24

25 **Authors:**

26 Nandita Bhan<sup>1</sup>

27 Swati Srivastava<sup>2</sup>

28 Sutapa Agrawal<sup>3</sup>

29 Malavika Subramanyam<sup>4</sup>

30 Christopher Millett<sup>5</sup>

31 Sakthivel Selvaraj<sup>2</sup>

32 SV Subramanian<sup>1</sup>  
33  
34  
35

36 <sup>1</sup> Department of Society, Human Development and Health, Harvard School of Public Health, Harvard  
37 University, Boston, USA

38 <sup>2</sup> Public Health Foundation of India (PHFI), New Delhi, India

39 <sup>3</sup> South Asia Network for Chronic Diseases (SANCD), New Delhi, India

40 <sup>4</sup> Center for Integrative Approaches to Health Disparities, School of Public Health, University of Michigan,  
41 Michigan, USA

42 <sup>5</sup> School of Public Health, Imperial College London, London, UK  
43  
44  
45  
46

47 **Word Count: 2873 words**  
48  
49  
50  
51  
52  
53  
54  
55  
56  
57  
58  
59  
60

**ABSTRACT: (298 words)**

**Objectives:** India bears a significant portion of the global tobacco burden with high prevalence of tobacco use among men and women. This study examines the socioeconomic patterning of tobacco use and identifies the changing gender and socioeconomic dynamics in light of the *Cigarette Epidemic Model*.

**Design:** Population-based cross-sectional surveys, NFHS -2 and 3, India

**Setting & participants:** 131,464 men and 130,886 women (NFHS-2) and 69,755 men and 124,142 women (NFHS -3) – ages 15-49 years.

**Outcomes & methods:** Outcomes include **smoking** (cigarettes, *bidis* and pipes/cigar), **chewing tobacco** (*paan masala*, *gutkha* or other chewed forms of tobacco) and **dual use** examined by education, wealth, living environment and caste/tribe. Standardized prevalence and percentage change were estimated. Pooled multilevel models estimate the effect of socioeconomic covariates on the log odds of tobacco use by gender, estimating fixed and random parameters.

**Findings:** Among men (2005-6), SES gradients in smoking (Illiterate: 44% vs. Postgraduates: 15%) and chewing (Illiterate: 47% vs. Postgraduate: 19%) were observed. Similar gradients observed by education, living environment and caste. Chewed tobacco prevalence among women showed inverse SES gradients comparing the illiterate (7.4%) vs. postgraduate (0.33%), and poorest (17%) vs. richest (2%) quintiles. However, change estimates showed greater percentage rises in smoking and chewing respectively by higher SES groups among men – postgraduates (98%) and richest (49%) compared to those with high schooling only (17%) and poorest (35%). Among women, higher educated showed larger declines - 90% (postgraduates) vs. 12% (illiterates). Younger men (15-24 years) showed increasing tobacco use (Smoking: 123% and Chewing: 112%). Older women (35-49 years) show higher prevalence 3.2% compared to 0.3% (15-24 years) for smoking.

**Conclusions:** Indian tobacco use patterns show significant diversions from the *Cigarette Epidemic Model*– from gender and socioeconomic perspectives. Separate analysis by type is needed to further understand social determinants of tobacco use in India.

**Article Summary**



### Article Focus

- India bears a significant burden of tobacco consumption, with high prevalence of smoking and chewing among men & women.
- Previous studies have established a unique social and spatial gradient in tobacco use. However, no studies have yet reported estimates for changing patterns in tobacco use prevalence or relative risk over time.
- This study estimates socioeconomic patterns and examines the changing gender and socioeconomic dynamics of tobacco use in light of the *Cigarette Epidemic Model*.

### Key Messages

- Among men, higher prevalence of smoking and chewing for less educated, poorer, rural and lower caste. Sharp and rising inequalities by survey year, but percentage change shows increases are greater among higher SES groups – higher education, urban, richer populations, previously unreported.
- Low and declining risks of smoking and chewing among women. Higher rates of chewing compared to smoking. Increase in smoking with urbanization for women. Greater declines over time for higher educated women.
- Significant changing trend by wealth, education and living environment in smoking among men and in chewing among women. Increases in smoking prevalence among younger men (15-24 years) and chewing among younger women (15-24 years).

### Strengths & limitations

- First systematic examination of socioeconomic patterns in tobacco use in India, highlighting SES gradients in use and risks among vulnerable populations.
- Large sample, representative and generalizable surveys providing repeated and comparable estimates over time.
- Limitations: a) cross-sectional data, limiting scope for causal inference, b) lack of data by tobacco type or volume of use, c) data from a reproductive health survey may suffer from social desirability bias.

## INTRODUCTION

Global estimates indicate that one in ten adult deaths can be attributed to tobacco consumption, leading to approximately 5 million global deaths per year[1-4]. Of these, 2.4 million deaths occur in developing countries. India bears a significant portion of this global tobacco burden[3-4]. Consumption of both smoked and smoke-less (chewed and inhaled) forms of tobacco is highly prevalent among men (47%) and women (14%)[5]. However, previous studies have indicated that tobacco use, like other non-communicable disease risk factors, is unequally distributed across different social determinants in India – education, caste and wealth – among both men and women[1,5-7], indicating a distinct ‘economic and spatial distribution’ in tobacco use[6]. No studies have yet systematically examined patterns and changes in the prevalence of tobacco consumption in India by socioeconomic factors over time.

In this study, we aim to provide estimates and inferences on the changing gradient of tobacco consumption in India, analysing prevalence and odds ratio patterns from the National Family Health Surveys[8-9]. We discuss our findings in light of the Cigarette Epidemic Model[10-11] and examine what populations show higher and lower prevalence of tobacco consumption over time.

## METHODS

Data was analysed from two rounds of the Indian National Family Health Survey (NFHS 2 & 3) conducted during 1998-99 and 2005-6. The NFHS is a nationally representative cross-sectional survey that is collected and managed by the Indian Institute of Population Sciences (IIPS) in Mumbai, India. These surveys provide vital sources of information on demographic, health and socioeconomic behaviour of Indian households. Data from men and women in the age group of 15-49 years was used from both survey rounds to ensure comparability. Data is representative of all Indian states (except the small Union Territories), hence covering almost 99 per cent of the country’s population. The surveys were collected using multistage cluster random sampling techniques. Rural and urban

1  
2  
3 areas are sampled separately and a uniform sample design was followed in each state;  
4 states and PSUs are considered as levels. Individual questionnaires for men and women  
5 were used to interview usual residents of the household or visitors who stayed in the  
6 house the night before. Further details on sample design, including sampling framework  
7 and sample implementation, are provided in the basic survey reports by IIPS [8-9].  
8  
9

10 Outcomes of interest include **smoking** (cigarettes, *bidis*<sup>1</sup> and pipes/cigar), **chewing**  
11 **tobacco** (*paan masala*<sup>2</sup>, *gutkha*<sup>3</sup> or other chewed forms of tobacco) and **dual use**  
12 (consuming both smoked and smoke-less forms) of tobacco. NFHS-3 provides details on  
13 the different types of smoked and smokeless tobacco products, but this information was  
14 unavailable in NFHS-2. The main covariates of interest were age, marital status and  
15 education at the individual level, and household wealth, area of residence (urban/rural),  
16 religion and caste/tribe status at the household level (*Variable definitions are provided in*  
17 *Table 1*). Survey-weighted age-standardised prevalence estimates of smoking, chewing  
18 and dual use of tobacco along with percentage change were calculated. Pooled multi-  
19 level models with state, local area and individual as analytical levels were used to  
20 estimate the effect of wealth, education, living environment and caste on the log odds of  
21 smoking and chewing among men and women. Regression models are adjusted for age,  
22 religion and marital status. Survey year was used in the interaction terms to estimate a  
23 time trend in socioeconomic determinants of tobacco. Tests for trend include joint tests  
24 for significance of fixed parameters and significance tests for random parameters. Model  
25 estimates were maximum likelihood-based using the Iterative Generalized Least-Squares  
26 (IGLS) algorithm as implemented within the MLwin software programme (version 2.23).  
27  
28  
29  
30  
31  
32  
33  
34  
35  
36  
37  
38  
39  
40  
41  
42  
43

## 44 RESULTS

45 Data used in this analysis covers 131,464 men and 130,886 women residing in 92,486  
46 households in NFHS-2 and 69,755 men and 124,142 women residing in 109,041  
47 households in NFHS-3, with an overall response rate of 96% for NFHS-2 and 98% for  
48 NFHS-3. Prevalence (%) of smoking, chewing and dual use of tobacco over two survey  
49  
50  
51  
52  
53

---

54  
55 <sup>1</sup> *Bidis* are local inexpensive cigarettes, that are thinner and contain tobacco flakes rolled inside tendu leaves. Bidis are often smoked  
56 by poorer populations.

57 <sup>2</sup> *Paan Masala* is a powdered preparation of betel leaves combined with cured tobacco and/or areca nut, which has stimulating  
58 properties

59 <sup>3</sup> *Gutkha* is a savoury or sweet preparation containing areca nut, tobacco, catechu, paraffin and slaked lime.  
60

1  
2  
3 rounds are presented by the three primary markers of socioeconomic status - education,  
4 wealth and caste (table 1) along with percentage change estimates. Estimates by living  
5 environment, marital status, age and religion are presented in the appendix (Web Table 1).  
6  
7 Among men, the prevalence of tobacco use (smoking, chewing and dual use) is seen to  
8 increase across all socioeconomic groups. For instance, smoking rises from 35.5% to  
9 40.6% in the fifth (poorest) quintile, 30.6% to 36.5% in the fourth quintile, 25.6 to 31.4%  
10 in the middle quintile, 19.3% to 25.8% in the second quintile and 11.9% to 19.9% in the  
11 first (richest) quintile (table 1). Chewed tobacco use increased from 34.4% to 47.1%  
12 among the illiterate populations, 30.2% to 41.9% among those with primary schooling  
13 only, 23.3% to 33.1% among those with high school education, 14.9% to 23.9% among  
14 those with college education and 12.4% to 18.5% among those with postgraduate degree.  
15 Higher prevalence of tobacco use among men in each survey round is seen for  
16 socioeconomically disadvantaged groups – with less educated, lower wealth, living in  
17 rural areas or lower caste showing an inverse SES gradient; however, greater proportional  
18 increases in prevalence over time are seen among higher SES groups. For instance,  
19 higher absolute smoking prevalence in NFHS 3 is seen among men in lower wealth  
20 quintiles compared to those in higher wealth quintiles (41% for fifth (poorest) quintile  
21 and 37% for fourth quintile, compared to 20% in first (richest) quintile and 26% in  
22 second quintile); higher percentage increases in smoking are recorded among first  
23 (richest) quintile (63%) and second quintile (37%) compared to fourth quintile (21%) and  
24 fifth (poorest) quintile (13%). Similar trend is seen for education with a 98% increase in  
25 prevalence among those with postgraduate education and 13% increase in prevalence  
26 among those with no education over the two survey rounds. Sharper inequalities with  
27 higher inter-group differences are seen for smoking compared to chewing. Prevalence of  
28 chewing among men in the richest quintile and with postgraduate education each  
29 increased by 49%, while that for the poorest increased by 35% and for those with no  
30 education increased by 37%.

31  
32 Socioeconomic patterns for tobacco use among women differ distinctly. Overall  
33 prevalence rates of tobacco use among women are significantly lower than men. In 2005-  
34 06, prevalence of smoking and chewing among women with no education was 2.3% and  
35 13.3% respectively, while the same for men was 43.9% and 47.1% respectively (table 1).  
36  
37  
38  
39  
40  
41  
42  
43  
44  
45  
46  
47  
48  
49  
50

1  
2  
3  
4  
5  
6  
7  
8  
9  
10  
11  
12  
13  
14  
15  
16  
17  
18  
19  
20  
21  
22  
23  
24  
25  
26  
27  
28  
29  
30  
31  
32  
33  
34  
35  
36  
37  
38  
39  
40  
41  
42  
43  
44  
45  
46  
47  
48  
49  
50  
51  
52  
53  
54  
55  
56  
57  
58  
59  
60

Women in most SES categories showed a declining trend for tobacco use, and only scheduled caste women and those with college education showed small increases in smoking and chewing. Higher and more consistent declines in prevalence are seen for education, compared to wealth and caste/tribe status. For instance, women with postgraduate education noted a 90% decrease in smoking and a 73% decrease in chewing (table 1). Women in the first (richest) quintile showed a decline of 30% for smoking and 8% for chewing (table 1). Results by area of residence (Web Table 1) show an increase in risks for tobacco use with urbanization among both men and women, except in the prevalence of chewed tobacco among women. Figures 1-2 show the percentage change in smoking and chewing by education and wealth for men and women reflecting findings from table 1.

Tables 2-3 present results from pooled multilevel models showing odds ratios for smoking and chewing by education, wealth, living environment and caste, along with interactions with survey year. Gradients in odds ratios (95% CI) are seen by all four markers of SES among men and women for smoking and chewing with sharper inequalities seen for education and wealth, compared to other markers. Controlling for wealth, caste and living environment and compared to those with postgraduate education, the odds ratio of smoking for men with no education: 3.18 (95% CI: 2.96,3.43), with primary education: 2.73 (95% CI: 2.54,2.94), with high school education: 1.81 (95% CI: 1.69,1.85) and with college education: 1.38 (95% CI: 1.28,1.49). Controlling for education, caste and living environment and compared to the first (richest) quintile, odds ratio for chewing in the second quintile: 1.43 (95% CI: 1.38,1.48), middle quintile 1.75 (95% CI: 1.68,1.82), fourth quintile: 1.92 (95% CI: 1.84,2.01) and fifth (poorest) quintile: 2.1 (95% CI: 1.99,2.2). Interaction terms in the two tables provide effect estimates for change over the two survey rounds. Among men, significant parameters for interaction terms for smoking are seen by wealth, education (except college educated) and living environment (except small city); and for chewing by wealth, higher education and by residence in towns. The joint test for interaction of fixed terms is significant for smoking by wealth (Joint test: 174.31,  $p < 0.001$ ), education (Joint test: 13.31,  $p = 0.009$ ) and living environment (Joint test: 13.44,  $p = 0.003$ ) and for chewing by wealth (Joint Test:

15.63,  $p=0.003$ ), representing robust change over time. Chi-square values for random parameters are significant both at state (Smoking  $\chi^2$ : 12.82,  $p=0.0003$  and Chewing  $\chi^2$ : 12.89,  $p=0.0003$ ) and local area (Smoking  $\chi^2$ : 650.41,  $p<0.0001$  and Chewing  $\chi^2$ : 801.4,  $p<0.0001$ ) level showing variation at both levels.

Among women, controlling for education, caste and living environment and compared to those in the first (richest) quintile, the odds ratio of smoking in second quintile: 1.48 (95% CI:1.28,1.71), middle quintile: 1.9 (95%CI:1.64,2.2), fourth quintile: 2.75 (95% CI: 2.37,3.19) and fifth (poorest) quintile: 3.95 (95% CI:3.39,4.6). Controlling for wealth, caste and living environment and compared to those with postgraduate education, odds ratio of chewing among women with college education: 1.84 (95% CI: 1.55,2.19), high school education: 2.19 (95% CI:1.86,2.57), primary schooling: 2.87 (95% CI:2.44,3.4) and no education: 3.85 (95% CI:3.27,4.53). Significant odds ratios for interaction terms are seen for smoking by wealth (Joint test: 19.128,  $p<0.0001$ ) and for chewing by wealth (Joint Test: 31.96,  $p<0.0001$ ), education (Joint test: 17.42,  $p<0.0001$ ) and living environment (Joint test: 157.008,  $p<0.0001$ ). Chi-square values for random parameters are significant for both state (Smoking  $\chi^2$ : 12.91,  $p=0.0004$  and Chewing  $\chi^2$ : 12.94,  $p=0.011$ ) and local area (Smoking  $\chi^2$ : 264,  $p<0.0001$  and Chewing  $\chi^2$ : 839,  $p<0.0001$ ), showing variation at both levels. Figure 3 presents adjusted probability estimates for smoking and chewing among men and women by wealth and education from multilevel models, which show findings similar to prevalence estimates.

## DISCUSSION

In 1994, Lopez et al.[10] proposed the four-stage *Cigarette Epidemic Model* discussing transitions in smoking prevalence, consumption amount and mortality in developed countries. As per the model in stage I, male smoking prevalence is comparatively low and rising (<20%) and female smoking prevalence does not exceed 5% due to sociocultural factors. In stage II, tobacco prevalence among men starts to rise rapidly and peaks around 50-80% with female smoking increasing at a lagged pace behind men. In stage III, prevalence rates for smoking among men start to fall, with both male and female smoking



1  
2  
3  
4  
5  
6  
7  
8  
9  
10  
11  
12  
13  
14  
15  
16  
17  
18  
19  
20  
21  
22  
23  
24  
25  
26  
27  
28  
29  
30  
31  
32  
33  
34  
35  
36  
37  
38  
39  
40  
41  
42  
43  
44  
45  
46  
47  
48  
49  
50  
51  
52  
53  
54  
55  
56  
57  
58  
59  
60

converging. Increases are seen for smoking rates among younger compared to older populations. In stage IV, prevalence of smoking begins to decline for both men and women. Mortality attributable to smoking rises to about one-third for all men, with much lower mortality rates seen among women. This model was developed based on empirical data from developed countries and has not been tested in developing countries. However, in 2011 Thun et al.[11] proposed modifications to the model potentially relevant for developing countries and were the first to note that smoking patterns by gender in developing countries distinctly differ from patterns noted in developed countries. India shows a high and complex burden of tobacco consumption, as also reported in tobacco surveillance studies[2,12-13]. This paper uses empirical evidence to show that India is currently between stages II and III of the Cigarette Epidemic model on the basis of estimates of smoking for men, but distinctly differs from the model on the patterns seen for women.

Overall, several dissimilarities are noted in the Indian experience from this model. **First**, India's unique tobacco experience comprises a 'double burden' of smoked **and** chewed tobacco consumption. Patterns for smoking and chewing seem to follow trajectories that differ by education, living environment and wealth. Further, within smoking, differences potentially exist by SES in the consumption of cigarettes from *bidis*, which most data are unable to distinguish. The quantity and quality of these products may differentially determine the mortality burden attributable to tobacco use in India[14-16]. Assessment of the disease, mortality and cost burden of the tobacco epidemic needs to account for this complexity[14-15].

**Second**, socioeconomic and sociocultural dynamics play profound roles in impacting tobacco use in India. Differences in tobacco consumption are seen by major SES markers such as wealth, education, living environment and caste. Findings from this analysis indicate a dichotomy between **higher absolute prevalence** by lower caste, wealth and education levels; but **higher relative change in prevalence** over time by higher caste, wealth and education levels. **No previous study has reported this finding for India.** Urbanization seems to be playing an increasing role in impacting tobacco use for men

1  
2  
3 and women. Further analyses by type and amount of tobacco consumed are needed to  
4 systematically understand these patterns.  
5  
6  
7

8  
9 **Third**, social gradients in tobacco use (overall and by type of tobacco) in India distinctly  
10 differ by gender. Despite women's empowerment, large-scale increases in women's  
11 smoking as predicted by the Cigarette Epidemic Model are yet to be seen in India[10-11,  
12 17-18]. Aggregate estimates show that women are far behind men in prevalence rates for  
13 smoking; and smoking and chewing rates among women, barring a few groups, seem to  
14 be declining. The reasons for this could be several. **First**, that Indian sociocultural  
15 realities and lower acceptability of smoking among women leads to delays in age of  
16 initiation of smoking and higher rates among older compared to younger women (Web  
17 Table 1). Women's smoking has been linked to their empowerment, but this may be  
18 confined to urban areas and it is possible that on average, smoking continues to remain a  
19 social taboo among women. Representation of smoking in the media may also explain the  
20 gender patterns in the use of tobacco; smoking has been projected as an expression of  
21 masculinity among men and has moralistic connotations for women[19-21]. **Second**, an  
22 economic perspective explaining the lower smoking rates among women in India may  
23 attribute this statistic to women's unequal participation in the labor market and limited  
24 access to personal disposable income. Higher smoking among women in cities may partly  
25 indicate greater uptake of smoking by employed women. **Third**, given that data for this  
26 analysis comes from a reproductive health survey, it is possible that results for women are  
27 an underestimate. Web table 1 indicates that older (above 35 years of age) women are  
28 more likely use tobacco. However, patterns in this analysis match findings from other  
29 tobacco studies such as the GATS in India (IIPS)[5-6], providing a counter to this  
30 argument.  
31  
32  
33  
34  
35  
36  
37  
38  
39  
40  
41  
42  
43  
44  
45  
46  
47  
48

49 **Finally**, evidence on the socioeconomic gradient in tobacco use in India needs to be  
50 linked to its implications for tobacco-related mortality and morbidity[14-15]. Dikshit et  
51 al.[15] provide the first estimates of cancer mortality in India, attributing a major  
52 component of age-standardized cancer mortality from lung and oral cancers to high rates  
53 of tobacco use in India. Analyses stratifying cancer morbidity and mortality in India by  
54  
55  
56  
57  
58  
59  
60



1  
2  
3  
4  
5  
6  
7  
8  
9  
10  
11  
12  
13  
14  
15  
16  
17  
18  
19  
20  
21  
22  
23  
24  
25  
26  
27  
28  
29  
30  
31  
32  
33  
34  
35  
36  
37  
38  
39  
40  
41  
42  
43  
44  
45  
46  
47  
48  
49  
50  
51  
52  
53  
54  
55  
56  
57  
58  
59  
60

SES have not yet been attempted, and the lack of reliable surveillance data for chronic diseases prevents an exhaustive assessment of the impact of tobacco use on Indian current and future chronic disease burden[22].

This study provides a systematic examination of the socioeconomic patterns in tobacco use in India over time. Data in this analysis comes from the NFHS, which is a large, representative and generalizable survey, providing a comparative picture of tobacco patterns over time. The limitations of this analysis are the following. First, data is cross-sectional, hence limiting scope for causal inference. NFHS does not provide detailed data by type or volume of tobacco. Finally, NFHS is a reproductive health survey where women in the ages of 15-49 years are sampled. Men are sampled in the households of the female sample. This introduces the potential for two downward biases. The first pertains to *social desirability bias* particularly related to underestimation of smoking patterns in women's childbearing years. Second, since the sample of men is conditional on the households from which women were sampled, the pool of men sampled may not be representative. Despite these caveats, NFHS (and in general the demographic and health surveys) has proven to be representative and generalizable, and continues to be used in a number of studies related to tobacco[5-6]. In addition, our findings are consistent with estimates from studies using other surveys assessing the burden of tobacco and its drivers in India[2,23]. Tobacco burden in the 'productive' populations (14-50 years) not only represents the current burden of tobacco but may predict future morbidity.

We present empirical evidence that India is experiencing a unique economic and social transition in tobacco consumption, quite distinct from the experience of developed countries that is likely to manifest in a number of morbidities[2,14-15]. In order to ensure policy effectiveness to prevent and reduce the exposure to tobacco, there is a need to systematically monitor and examine the social inequities in tobacco use over time and channel interventions to the social groups that are most vulnerable to these inequalities.

1  
2  
3  
4  
5  
6  
7  
8  
9  
10  
11  
12  
13  
14  
15  
16  
17  
18  
19  
20  
21  
22  
23  
24  
25  
26  
27  
28  
29  
30  
31  
32  
33  
34  
35  
36  
37  
38  
39  
40  
41  
42  
43  
44  
45  
46  
47  
48  
49  
50  
51  
52  
53  
54  
55  
56  
57  
58  
59  
60

For peer review only

**TABLES, FIGURES AND REFERENCES**

**Table 1: Prevalence (%) of tobacco smoking, chewing and dual use (smoking and chewing) by wealth, education and caste/tribe status among men and women in the National Family Health Surveys 1998-99 and 2005-6**

|                                        | Sample Population        |                          | MEN                     |                               |     |                          |                         |     |                         |                                 |                         | FEMALE                     |        |                         |                          |        |                           |                                 |        |     |
|----------------------------------------|--------------------------|--------------------------|-------------------------|-------------------------------|-----|--------------------------|-------------------------|-----|-------------------------|---------------------------------|-------------------------|----------------------------|--------|-------------------------|--------------------------|--------|---------------------------|---------------------------------|--------|-----|
|                                        |                          |                          | SMOKE                   |                               |     | CHEW                     |                         |     | DUAL                    |                                 |                         | SMOKE                      |        |                         | CHEW                     |        |                           | DUAL                            |        |     |
|                                        |                          |                          | 1998-9                  | 2005-6                        | % Δ | 1998-9                   | 2005-6                  | % Δ | 1998-9                  | 2005-6                          | % Δ                     | 1998-9                     | 2005-6 | % Δ                     | 1998-9                   | 2005-6 | % Δ                       | 1998-9                          | 2005-6 | % Δ |
| <b>Caste/ tribe status<sup>1</sup></b> |                          |                          |                         |                               |     |                          |                         |     |                         |                                 |                         |                            |        |                         |                          |        |                           |                                 |        |     |
| <i>General</i>                         | (M) 50,939<br>(F) 50,526 | (M) 21,850<br>(F) 41,844 | 22.2<br>(21.4,<br>22.9) | 28.8<br>(27.7,<br>29.9)       | 30  | 22.2<br>(21.4,23<br>.02) | 33.2<br>(31.8,<br>34.5) | 50  | 7.4<br>(6.9,7<br>.8)    | 10.8<br>(10.<br>0,11<br>.5)     | 1.0<br>(0.9,<br>1.1)    | 0.8<br>(0.55,<br>1.0)      | -20    | 6.6 (6.1,<br>7.1)       | 7.24<br>(6.6,7.<br>85)   | 10     | 0.24<br>(0.17,<br>0.3)    | 0.2<br>(0.11,0<br>.27)          |        |     |
| <i>SC</i>                              | (M) 21,491<br>(F) 21,045 | (M) 11,953<br>(F) 20,566 | 31.5<br>(30.5,<br>32.5) | 39.3<br>(37.8,<br>40.9)       | 25  | 27.8<br>(26.6,<br>29.1)  | 40.5<br>(38.8,<br>42.1) | 46  | 12.1<br>(11.4,<br>12.8) | 15.8<br>(14.<br>7,16<br>.9)     | 2.3<br>(1.9,2.<br>8)    | 2.4<br>(2.05,2<br>.8)      | 4      | 10.9<br>(10.1,11<br>.8) | 12.1<br>(11.2,1<br>2.9)  | 11     | 0.5<br>(0.4,0.<br>7)      | 0.4<br>(0.3,0.<br>6)            |        |     |
| <i>ST</i>                              | (M) 16,187<br>(F) 16,520 | (M) 8,453<br>(F) 16,518  | 30.6<br>(28.8,<br>32.3) | 36.6<br>(34.1,<br>39.1)       | 20  | 38.6<br>(36.9,<br>40.4)  | 52.6<br>(49.9,<br>55.3) | 36  | 14.5<br>(13.3,<br>15.6) | 18.6<br>(16.<br>7,20<br>.4)     | 3.0<br>(2.5,3.<br>6)    | 2.7<br>(2.04,3<br>.4)      | -10    | 18.5<br>(17.0,20<br>.1) | 25.08<br>(22.8,2<br>7.4) | 36     | 1.0<br>(0.7,1.<br>2)      | 0.9<br>(0.6,1.<br>3)            |        |     |
| <i>OBC</i>                             | (M) 36,381<br>(F) 36,290 | (M) 25,144<br>(F) 29,561 | 24.7<br>(23.9,<br>25.5) | 31.2<br>(30.2,<br>32.2)       | 26  | 25.4<br>(24.5,<br>26.3)  | 36.2<br>(35.0,<br>37.5) | 43  | 9.9<br>(9.4,1<br>0.5)   | 13.1<br>(12.<br>3,13<br>.8)     | 1.5<br>(1.3,1.<br>7)    | 1.4<br>(1.2,1.<br>7)       | -7     | 7.3<br>(6.8,7.7<br>)    | 7.08<br>(6.6,7.<br>6)    | -3     | 0.3<br>(0.26,0<br>.4)     | 0.14<br>(0.09,0<br>.21)         |        |     |
| <i>No caste</i>                        | (M) 6,466<br>(F) 6,505   | (M) 2,355<br>(F) 5,653   | 31.8<br>(29.4,<br>34.3) | 37.9<br>(34.2,<br>41.6)       | 19  | 23.3<br>(20.9,<br>25.6)  | 35.5<br>(31.6,<br>39.3) | 52  | 10.7<br>(9.3,<br>12.1)  | 13.0<br>(10.<br>9,15<br>.2)     | 1.4<br>(0.8,1.<br>9)    | 0.9<br>(0.36,1<br>.48)     | -36    | 10.3<br>(9.1,11.<br>6)  | 12.8<br>(10.8,1<br>4.8)  | 24     | 0.4<br>(0.2,0.<br>6)      | 0.31<br>(0.03,0<br>.59)         |        |     |
| <b>Education Level<sup>2</sup></b>     |                          |                          |                         |                               |     |                          |                         |     |                         |                                 |                         |                            |        |                         |                          |        |                           |                                 |        |     |
| <i>Post graduate</i>                   | (M) 3,432<br>(F) 1,963   | (M) 2,920<br>(F) 3,526   | 7.6<br>(6.5,<br>8.7)    | 15.05<br>(13.0<br>1,17.<br>1) | 98  | 12.4<br>(10.8,14<br>.1)  | 18.5<br>(16.0,<br>21.1) | 49  | 1.7<br>(1.2,2<br>.2)    | 4.04<br>(3.0,<br>5.1)           | 0.2 (-<br>0.2,<br>0.6)  | 0.02 (-<br>0.007,<br>0.05) | -90    | 1.2<br>(0.45,1.<br>9)   | 0.33<br>(0.14,0<br>.5)   | -73    | 0.2 (-<br>0.17,0.<br>5)   | 0.004<br>(-<br>0.002,<br>0.012) |        |     |
| <i>College</i>                         | (M) 11,340<br>(F) 6,586  | (M) 7,811<br>(F) 9,424   | 11.1<br>(10.2,<br>11.9) | 20.7<br>(19.2,<br>22.1)       | 86  | 14.9<br>(13.9,15<br>.8)  | 23.9<br>(22.3,<br>25.6) | 60  | 3.5<br>(3.1,3<br>.9)    | 6.7<br>(5.8,<br>7.6)            | 0.1 (-<br>0.01,0.<br>2) | 0.11<br>(0.03,<br>0.19)    | 10     | 1.3<br>(0.9,1.6<br>)    | 1.8<br>(1.4,2.<br>2)     | 39     | 0.05 (-<br>0.04,0.<br>14) | 0.04 (-<br>0.017,<br>0.1)       |        |     |
| <i>High school</i>                     | (M) 69,996<br>(F) 46,629 | (M) 26,100<br>(F) 34,338 | 21.2<br>(20.7,2<br>1.8) | 24.7<br>(23.8,<br>.25.5)      | 17  | 23.3<br>(22.7,23<br>.9)  | 33.1<br>(32.0,<br>34.1) | 42  | 7.8<br>(7.5,<br>8.2)    | 9.9<br>(9.3,<br>10.6<br>)       | 0.2<br>(0.17,<br>0.3)   | 0.07<br>(0.04,<br>0.1)     | -65    | 4.2 (3.9,<br>4.6)       | 3.4<br>(3.04,3<br>.7)    | -19    | 0.1<br>(0.06,0<br>.13)    | 0.04(0.<br>02,0.0<br>6)         |        |     |
| <i>Primary school</i>                  | (M) 21,730<br>(F) 20,604 | (M) 12,622<br>(F) 19,451 | 32.7<br>(31.7,3<br>3.6) | 35.6<br>(34.3,<br>36.9)       | 1   | 30.2<br>(29.2,<br>31.2)  | 41.9<br>(40.5,<br>43.4) | 39  | 12.1<br>(11.4,<br>12.7) | 14.8<br>(13.<br>8,<br>15.7<br>) | 0.7<br>(0.5,0.<br>8)    | 0.2<br>(0.13,0<br>.3)      | -71    | 9.0<br>(8.4,9.6<br>)    | 7.4<br>(6.8,8.<br>02)    | -18    | 0.18<br>(0.13,0<br>.24)   | 0.07<br>(0.03,0<br>.11)         |        |     |

|                         |                                  |                                 |                          |                         |    |                         |                              |    |                          |                             |                         |                         |     |                          |                          |     |                         |                           |
|-------------------------|----------------------------------|---------------------------------|--------------------------|-------------------------|----|-------------------------|------------------------------|----|--------------------------|-----------------------------|-------------------------|-------------------------|-----|--------------------------|--------------------------|-----|-------------------------|---------------------------|
| <i>Illiterate</i>       | (M) 24,966<br>(F) 55,104         | (M) 20,302<br>(F) 57,403        | 38.9<br>(37.9,,<br>39.9) | 43.9<br>(42.8,<br>45.2) | 13 | 34.4<br>(33.2,35<br>.5) | 47.1<br>(45.7,<br>48.5)      | 37 | (15.9<br>(15.1,<br>16.6) | 18.9<br>(17.<br>9,19<br>.9) | 2.6<br>(2.4,,2.<br>9)   | 2.3<br>(2.02,2<br>.6)   | -12 | 11.9<br>(11.4,<br>12.6)  | 13.3<br>(12.6,<br>13.0)  | 12  | 0.6<br>(0.53,0<br>.72)  | 0.42<br>(0.33,0<br>.51)   |
| <b>Wealth Quintiles</b> |                                  |                                 |                          |                         |    |                         |                              |    |                          |                             |                         |                         |     |                          |                          |     |                         |                           |
| <i>Richest</i>          | (M) 26,291<br>(F) 26,177         | (M) 13,706<br>(F) 24,837        | 11.9<br>(11.2,<br>12.5)  | 19.9<br>(18.8,<br>21.1) | 63 | 13.7<br>(12.8,14<br>.6) | 20.4<br>(19.0,<br>21.8)      | 49 | 3.3<br>(2.97,<br>3.6)    | 5.8<br>(5.1,<br>6.4)        | 0.2<br>(0.1,0.<br>3)    | 0.14<br>(0.08,0<br>.2)  | -30 | 2.2<br>(1.9,2.5<br>)     | 2.02<br>(1.7,2.<br>3)    | -8  | 0.05<br>(0.01,0<br>.07) | 0.042<br>(0.009,<br>0.07) |
| <i>Richer</i>           | (M) 26,293<br>(F) 26,177         | (M) 13,946<br>(F) 24,837        | 19.3<br>(18.5,<br>20.04) | 25.8<br>(24.6,<br>27.1) | 37 | 19.0<br>(18.1,19<br>.9) | 30.2<br>(28.7,<br>31.7)      | 59 | 5.6<br>(5.2,6<br>.02)    | 9.3<br>(8.4,<br>10.2<br>)   | 0.46<br>(0.37,0<br>.54) | 0.37<br>(0.27,0<br>.47) | -20 | 5.4<br>(4.9,5.9<br>)     | 4.9<br>(4.4,5.<br>4)     | -9  | 0.1<br>(0.07,0<br>.18)  | 0.06<br>(0.02,0<br>.09)   |
| <i>Middle</i>           | (M) 26,294<br>(F) 26,174         | (M) 14,075<br>(F) 24,826        | 25.6<br>(24.7,2<br>6.4)  | 31.4<br>(30.1,<br>32.7) | 25 | 22.9<br>(22.0,23<br>.9) | 34.9<br>(33.4,<br>36.3)      | 52 | 7.6<br>(7.2,8<br>.1)     | 11.5<br>(10.<br>6,12<br>.3) | 1.1<br>(0.9,1.<br>3)    | 0.7<br>(0.6,0.<br>9)    | -36 | 7.8<br>(7.2,8.3<br>)     | 6.9<br>(6.4,7.<br>4)     | -11 | 0.23<br>(0.16,0<br>.3)  | 0.07<br>(0.04,0<br>.11)   |
| <i>Poorer</i>           | (M) 26,293<br>(F) 26,179         | (M) 14,007<br>(F) 24,814        | 30.6<br>(29.7,3<br>1.5)  | 36.5<br>(35.2,<br>37.8) | 21 | 28.9<br>(28.0,29<br>.9) | 39.5<br>(38.0<br>3,40.<br>9) | 37 | 11.6<br>(10.9,<br>12.2)  | 14.5<br>(13.<br>6,15<br>.5) | 1.7<br>(1.5,1.<br>9)    | 1.7<br>(1.4,1.<br>9)    | 0   | 10.9,<br>(10.3,11<br>.6) | 10.5<br>(9.8,12<br>.2)   | -4  | 0.4<br>(0.3,0.<br>5)    | 0.24<br>(0.17,0<br>.31)   |
| <i>Poorest</i>          | (M) 26,293<br>(F) 26,179         | (M) 14,021<br>(F) 24,828        | 35.5<br>(34.4,,<br>36.5) | 40.6,<br>39.3,<br>41.9) | 13 | 36.8<br>(35.7,37<br>.9) | 49.7<br>(48.2,<br>51.2)      | 35 | 16.7<br>(15.9,<br>17.5)  | 19.4<br>(18.<br>4,20<br>.5) | 3.5<br>(3.1,3.<br>9)    | 3.2<br>(2.8,3.<br>7)    | -9  | 14.1<br>(13.3,15<br>.0)  | 17.1<br>(16.03,<br>18.1) | 21  | 0.9<br>(0.7,1.<br>0)    | 0.7<br>(0.52,0<br>.86)    |
| <i>Total</i>            | (M)<br>131,464<br>(F)<br>130,886 | (M)<br>69,755<br>(F)<br>124,142 |                          |                         |    |                         |                              |    |                          |                             |                         |                         |     |                          |                          |     |                         |                           |

<sup>1</sup>Scheduled castes and scheduled tribes are identified by the Government of India as socially and economically backward and needing protection from social injustice and exploitation. Other backward class is a diverse collection of intermediate castes that were considered low in the traditional caste hierarchy but are clearly above scheduled castes. General is thus a default residual group that enjoys higher status in the caste hierarchy.

<sup>2</sup>Post graduate: 15 or more years of education; college: 13-15 years of education; high school: 8-12 years of education; secondary: 5-8 years of education; primary: 0-5 years of education; illiterate: 0 years of education

\*Percentage change (%  $\Delta$ ) numbers have been rounded to the nearest integer.

\*All results for prevalence are survey adjusted and age-standardised. Prevalence results are all in percentages.

1  
2  
3  
4  
5  
6  
7  
8  
9  
10  
11  
12  
13  
14  
15  
16  
17  
18  
19  
20  
21  
22  
23  
24  
25  
26  
27  
28  
29  
30  
31  
32  
33  
34  
35  
36  
37  
38  
39  
40  
41  
42  
43  
44  
45  
46  
47  
48  
49

**Table 2: Pooled Regression Models showing Odds Ratios (95% CIs) for Smoking and Chewing among men and interactions for wealth, education, residence and caste over time.**

| Covariates                             | Smoking             |                                  |                                     |                                              |                                 | Chewing             |                                  |                                     |                                              |                                 |
|----------------------------------------|---------------------|----------------------------------|-------------------------------------|----------------------------------------------|---------------------------------|---------------------|----------------------------------|-------------------------------------|----------------------------------------------|---------------------------------|
|                                        | Model 1: Full Model | Model 2: Interaction with Wealth | Model 3: Interaction with Education | Model 4: Interaction with Living Environment | Model 5: Interaction with Caste | Model 1: Full Model | Model 2: Interaction with Wealth | Model 3: Interaction with Education | Model 4: Interaction with Living Environment | Model 5: Interaction with Caste |
| <b>Wealth Quintiles (Richest)</b>      | 1.00                | 1.00                             | 1.00                                | 1.00                                         | 1.00                            | 1.00                | 1.00                             | 1.00                                | 1.00                                         | 1.00                            |
| Richer                                 | 1.37<br>(1.32,1.43) | 1.51<br>(1.44,1.59)              | 1.37<br>(1.31,1.42)                 | 1.36<br>(1.3,1.41)                           | 1.37<br>(1.31,1.42)             | 1.43<br>(1.38,1.48) | 1.33<br>(1.27,1.4)               | 1.42<br>(1.36,1.47)                 | 1.42<br>(1.36,1.47)                          | 1.41<br>(1.36,1.47)             |
| Middle                                 | 1.71<br>(1.64,1.78) | 1.99<br>(1.89,2.1)               | 1.71<br>(1.64,1.78)                 | 1.68<br>(1.61,1.75)                          | 1.7<br>(1.63,1.77)              | 1.75<br>(1.68,1.82) | 1.63<br>(1.55,1.72)              | 1.73<br>(1.66,1.8)                  | 1.72<br>(1.65,1.8)                           | 1.72<br>(1.65,1.79)             |
| Poorer                                 | 2.06<br>(1.97,2.16) | 2.51<br>(2.37,2.65)              | 2.05<br>(1.96,2.14)                 | 2.02<br>(1.93,2.11)                          | 2.04<br>(1.95,2.14)             | 1.92<br>(1.84,2.01) | 1.77<br>(1.67,1.87)              | 1.89<br>(1.8,1.97)                  | 1.86<br>(1.78,1.95)                          | 1.87<br>(1.79,1.96)             |
| Poorest                                | 2.33<br>(2.22,2.46) | 2.88<br>(2.72,3.06)              | 2.31<br>(2.19,2.43)                 | 2.29<br>(2.18,2.41)                          | 2.3<br>(2.19,2.42)              | 2.1<br>(1.99,2.2)   | 1.93<br>(1.82,2.05)              | 2.03<br>(1.92,2.13)                 | 2.03<br>(1.93,2.13)                          | 2.02<br>(1.93,2.12)             |
| <b>Education (Post graduate)</b>       | 1.00                | 1.00                             | 1.00                                | 1.00                                         | 1.00                            | 1.00                | 1.00                             | 1.00                                | 1.00                                         | 1.00                            |
| College                                | 1.38<br>(1.28,1.49) | 1.41<br>(1.31,1.53)              | 1.34<br>(1.19,1.5)                  | 1.4 (1.29,1.51)                              | 1.4<br>(1.3,1.51)               | 1.26<br>(1.17,1.36) | 1.28<br>(1.19,1.39)              | 1.14<br>(1.02,1.27)                 | 1.29<br>(1.19,1.39)                          | 1.29<br>(1.2,1.39)              |
| High School                            | 1.81<br>(1.69,1.95) | 1.91<br>(1.78,2.05)              | 2.16<br>(1.95,2.4)                  | 1.87<br>(1.74,2.01)                          | 1.87<br>(1.74,2.01)             | 1.53<br>(1.43,1.65) | 1.64<br>(1.53,1.76)              | 1.46<br>(1.33,1.61)                 | 1.65<br>(1.54,1.77)                          | 1.66<br>(1.54,1.78)             |
| Primary                                | 2.73<br>(2.54,2.94) | 2.81<br>(2.61,3.04)              | 3.4<br>(3.05,3.78)                  | 2.77<br>(2.57,2.99)                          | 2.77<br>(2.57,2.99)             | 1.98<br>(1.84,2.13) | 2.04<br>(1.9,2.2)                | 1.84<br>(1.66,2.04)                 | 2.05<br>(1.9,2.21)                           | 2.06<br>(1.91,2.21)             |
| No education                           | 3.18<br>(2.96,3.43) | 3.27<br>(3.03,3.53)              | 4.07<br>(3.66,4.53)                 | 3.19<br>(2.96,4.34)                          | 3.18<br>(2.95,3.42)             | 2.09<br>(1.94,2.26) | 2.06<br>(1.91,2.22)              | 1.93<br>(1.74,2.14)                 | 2.07<br>(1.92,2.23)                          | 2.08<br>(1.93,2.24)             |
| <b>Living Environment (Large city)</b> | 1.00                | 1.00                             | 1.00                                | 1.00                                         | 1.00                            | 1.00                | 1.00                             | 1.00                                | 1.00                                         | 1.00                            |
| Small City                             | 0.77<br>(0.72,0.82) | 0.81<br>(0.76,0.87)              | 0.8<br>(0.74,0.85)                  | 0.82 (0.75,0.9)                              | 0.79<br>(0.74,0.84)             | 0.96<br>(0.89,1.02) | 1.02<br>(0.96,1.09)              | 1.02<br>(0.96,1.09)                 | 1.06<br>(0.97,1.16)                          | 1.03<br>(0.97,1.1)              |
| Town                                   | 0.78<br>(0.74,0.82) | 0.83(0.79,0.88)                  | 0.81(0.77,0.85)                     | 0.88<br>(0.82,0.95)                          | 0.81<br>(0.77,0.85)             | 0.92<br>(0.87,0.97) | 1.01<br>(0.95,1.06)              | 1.01<br>(0.95,1.06)                 | 1.06<br>(0.98,1.15)                          | 1.01<br>(0.96,1.07)             |
| Village                                | 0.68<br>(0.65,0.71) | 0.75<br>(0.71,0.78)              | 0.73<br>(0.7,0.77)                  | 0.87<br>(0.82,0.92)                          | 0.73<br>(0.7,0.76)              | 0.76<br>(0.73,0.79) | 0.92<br>(0.88,0.96)              | 0.92<br>(0.88,0.96)                 | 0.93<br>(0.88,0.99)                          | 0.93<br>(0.88,0.97)             |

|                            |                     |                     |                     |                     |                     |                     |                     |                      |                      |                     |
|----------------------------|---------------------|---------------------|---------------------|---------------------|---------------------|---------------------|---------------------|----------------------|----------------------|---------------------|
| <b>Caste/Tribe (Other)</b> | 1.00                | 1.00                | 1.00                | 1.00                | 1.00                | 1.00                | 1.00                | 1.00                 | 1.00                 | 1.00                |
| SC                         | 1.16<br>(1.12,1.2)  | 1.15<br>(1.11,1.19) | 1.15<br>(1.11,1.18) | 1.15<br>(1.11,1.19) | 1.16<br>(1.11,1.21) | 1.12<br>(1.08,1.15) | 1.1<br>(1.06,1.13)  | 1.1<br>(1.06,1.13)   | 1.1<br>(1.06,1.13)   | 1.1<br>(1.06,1.14)  |
| ST                         | 1.14<br>(1.09,1.2)  | 1.13 (1.08, 1.2)    | 1.14<br>(1.08,1.18) | 1.14 (1.09,1.2)     | 1.15<br>(1.09,1.21) | 3.02<br>(2.88,3.15) | 1.1<br>(1.06,1.15)  | 1.1<br>(1.05,1.15)   | 1.1<br>(1.05,1.15)   | 1.17<br>(1.11,1.24) |
| OBC                        | 1.00<br>(0.98,1.04) | 0.99<br>(0.97,1.02) | 0.99<br>(0.96,1.02) | 0.99<br>(0.97,1.02) | 1.03<br>(0.99,1.07) | 1.05<br>(1.02,1.08) | 1.01<br>(0.97,1.03) | 1.002<br>(0.97,1.03) | 1.003<br>(0.97,1.03) | 1.04<br>(0.99,1.07) |
| No Caste or missing        | 1.06<br>(1.01,1.13) | 1.07<br>(1.01,1.13) | 1.07<br>(1.01,1.13) | 1.08<br>(1.02,1.14) | 1.05<br>(0.98,1.13) | 0.97<br>(0.92,1.03) | 1.02<br>(0.96,1.08) | 1.01<br>(0.96,1.08)  | 1.02<br>(0.96,1.08)  | 0.97<br>(0.9,1.04)  |
| <b>Survey Year (Yr)</b>    |                     | 1.74<br>(1.7,1.88)  | 1.67<br>(1.46,1.91) | 1.49 (1.4,1.58)     | 1.24<br>(1.19,1.3)  |                     | 1.47<br>(1.38,1.56) | 1.34<br>(1.17,1.54)  | 1.69<br>(1.58,1.8)   | 1.72<br>(1.65,1.79) |
| Yr *Richer                 |                     | 0.78<br>(0.73,0.84) |                     |                     |                     |                     | 1.15<br>(1.07,1.24) |                      |                      |                     |
| Yr*Middle                  |                     | 0.68<br>(0.63,0.73) |                     |                     |                     |                     | 1.13<br>(1.05,1.22) |                      |                      |                     |
| Yr *Poorer                 |                     | 0.60<br>(0.56,0.65) |                     |                     |                     |                     | 1.15<br>(1.07,1.24) |                      |                      |                     |
| Yr *Poorest                |                     | 0.58<br>(0.53,0.62) |                     |                     |                     |                     | 1.11 (1.03, 1.2)    |                      |                      |                     |
| Yr *College                |                     |                     | 1.13<br>(0.97,1.32) |                     |                     |                     |                     | 1.27<br>(1.1,1.48)   |                      |                     |
| Yr * High School           |                     |                     | 0.78<br>(0.68,0.89) |                     |                     |                     |                     | 1.28<br>(1.11,1.47)  |                      |                     |
| Yr * Primary               |                     |                     | 0.66<br>(0.57,0.77) |                     |                     |                     |                     | 1.02<br>(0.88,,1.18) |                      |                     |
| Yr * No education          |                     |                     | 0.61<br>(0.53,0.70) |                     |                     |                     |                     | 1.01<br>(0.87,1.17)  |                      |                     |
| Yr *Small City             |                     |                     |                     | 0.99<br>(0.87,1.12) |                     |                     |                     |                      | 0.94<br>(0.82,1.06)  |                     |
| Yr * Town                  |                     |                     |                     | 0.89<br>(0.81,0.98) |                     |                     |                     |                      | 0.9<br>(0.82,0.99)   |                     |
| Yr * Village               |                     |                     |                     | 0.73<br>(0.68,0.79) |                     |                     |                     |                      | 0.98<br>(0.91,1.05)  |                     |
| Yr *SC                     |                     |                     |                     |                     | 0.99<br>(0.92,1.05) |                     |                     |                      |                      | 0.99<br>(0.93,1.06) |
| Yr *ST                     |                     |                     |                     |                     | 0.97<br>(0.9,1.05)  |                     |                     |                      |                      | 0.84<br>(0.78,0.91) |
| Yr*OBC                     |                     |                     |                     |                     | 0.92<br>(0.87,0.97) |                     |                     |                      |                      | 0.92<br>(0.87,0.97) |
| Yr*No Caste                |                     |                     |                     |                     | 1.07<br>(0.94,1.21) |                     |                     |                      |                      | 1.15<br>(1.02,1.29) |

1  
2  
3  
4  
5  
6  
7  
8  
9  
10  
11  
12  
13  
14  
15  
16  
17  
18  
19  
20  
21  
22  
23  
24  
25  
26  
27  
28  
29  
30  
31  
32  
33  
34  
35  
36  
37  
38  
39  
40  
41  
42  
43  
44  
45  
46  
47  
48  
49

| <i>Fixed Part of the Model</i>               |  |                  |                 |                 |                 |  |                  |                  |                  |                  |
|----------------------------------------------|--|------------------|-----------------|-----------------|-----------------|--|------------------|------------------|------------------|------------------|
| Joint Chi Test for Interaction (p-value)     |  | 174.31 (p<0.001) | 13.31 (p=0.009) | 13.44 (p=0.003) | 0.318 (p=0.98)  |  | 15.63 (p=0.003)  | 8.52 (p=0.074)   | 2.6 (p=0.46)     | 1.387 (p=0.85)   |
| <i>Random Part of the Model</i>              |  |                  |                 |                 |                 |  |                  |                  |                  |                  |
| Chi square for Level 3: State (p-value)      |  | 12.82 (p=0.003)  | 12.82 (p=0.003) | 12.82 (p=0.003) | 12.82 (p=0.003) |  | 12.89 (p=0.0003) | 12.89 (p=0.0003) | 12.89 (p=0.0003) | 12.89 (p=0.0003) |
| Chi square for Level 2: Local Area (p-value) |  | 650.41 (p<0.001) | 655.7 (p<0.001) | 654.2 (p<0.001) | 660.7 (p<0.001) |  | 801.6 (p<0.001)  | 802.4 (p<0.001)  | 802.4 (p<0.001)  | 801.7 (p<0.001)  |

\*Models are controlled for age (centered at 29 years), marital status and religion

Peer review only

**Table 3: Pooled Regression Models showing Odds Ratios (95% CIs) for Smoking and Chewing among women and interactions for wealth, education, residence and caste over time.**

| Covariates                             | Smoking                |                                        |                                              |                                                       |                                       | Chewing                |                                        |                                              |                                                       |                                       |
|----------------------------------------|------------------------|----------------------------------------|----------------------------------------------|-------------------------------------------------------|---------------------------------------|------------------------|----------------------------------------|----------------------------------------------|-------------------------------------------------------|---------------------------------------|
|                                        | Model 1:<br>Full Model | Model 2:<br>Interaction<br>with Wealth | Model 3:<br>Interaction<br>with<br>Education | Model 4:<br>Interaction with<br>Living<br>Environment | Model 5:<br>Interaction<br>with Caste | Model 1:<br>Full Model | Model 2:<br>Interaction<br>with Wealth | Model 3:<br>Interaction<br>with<br>Education | Model 4:<br>Interaction with<br>Living<br>Environment | Model 5:<br>Interaction<br>with Caste |
| <b>Wealth Quintiles (Richest)</b>      | 1.00                   | 1.00                                   | 1.00                                         | 1.00                                                  | 1.00                                  | 1.00                   | 1.00                                   | 1.00                                         | 1.00                                                  | 1.00                                  |
| Richer                                 | 1.48<br>(1.28,1.71)    | 1.82<br>(1.49,2.22)                    | 1.48<br>(1.28,1.71)                          | 1.48 (1.28,1.71)                                      | 1.49<br>(1.29,1.72)                   | 1.48<br>(1.41,1.56)    | 1.41<br>(1.32,1.51)                    | 1.48<br>(1.4,1.55)                           | 1.51 (1.43,1.59)                                      | 1.48<br>(1.41,1.56)                   |
| Middle                                 | 1.9<br>(1.64,2.19)     | 2.63<br>(2.17,3.19)                    | 1.87<br>(1.62,2.16)                          | 1.88 (1.62,2.18)                                      | 1.9 (1.64,2.19)                       | 1.75<br>(1.66,1.85)    | 1.58 (1.47,1.7)                        | 1.75<br>(1.65,1.84)                          | 1.81 (1.72,1.92)                                      | 1.76<br>(1.66,1.85)                   |
| Poorer                                 | 2.75<br>(2.37,3.19)    | 3.72<br>(3.07,5.52)                    | 2.8<br>(2.41,3.25)                           | 2.81 (2.42,3.26)                                      | 2.85<br>(2.45,3.30)                   | 2.14<br>(2.02,2.27)    | 1.86<br>(1.72,2.002)                   | 2.13<br>(2.01,2.25)                          | 2.2 (2.07,2.32)                                       | 2.14<br>(2.02,2.27)                   |
| Poorest                                | 3.95<br>(3.39,4.6)     | 4.83<br>(3.97,5.88)                    | 4.03<br>(3.46,4.69)                          | 4.05 (3.47,4.72)                                      | 4.08 (3.5,4.75)                       | 2.67<br>(2.5,2.84)     | 2.14<br>(1.99,2.32)                    | 2.65<br>(2.49,2.82)                          | 2.7 (2.54,2.88)                                       | 2.7 (2.5,2.84)                        |
| <b>Education (Post graduate)</b>       | 1.00                   | 1.00                                   | 1.00                                         | 1.00                                                  | 1.00                                  | 1.00                   | 1.00                                   | 1.00                                         | 1.00                                                  | 1.00                                  |
| College                                | 1.59<br>(0.91,2.8)     | 1.61<br>(0.92,2.82)                    | 0.98<br>(0.37,2.58)                          | 1.58 (0.9,2.78)                                       | 1.57 (0.9,2.75)                       | 1.84<br>(1.55,2.19)    | 1.83<br>(1.54,2.17)                    | 1.1<br>(0.85,1.42)                           | 1.82 (1.53,2.17)                                      | 1.84<br>(1.55,2.19)                   |
| High School                            | 1.78<br>(1.06,2.99)    | 1.67<br>(1.01,,2.82)                   | 1.95<br>(0.83,4.56)                          | 1.62 (0.96,2.72)                                      | 1.61 (0.99,2.7)                       | 2.19<br>(1.86,2.57)    | 2.13<br>(1.82,2.51)                    | 1.47<br>(1.17,1.85)                          | 2.15 (1.82,2.54)                                      | 2.21<br>(1.88,2.6)                    |
| Primary                                | 2.78<br>(1.66,4.68)    | 2.62<br>(1.56,4.41)                    | 3.32<br>(1.42,7.76)                          | 2.54 (1.51,4.29)                                      | 2.52 (1.5,4.24)                       | 2.87<br>(2.44,3.4)     | 2.83 (2.4,3.33)                        | 2.03<br>(1.61,2.56)                          | 2.86 (2.42,3.37)                                      | 2.89<br>(2.45,3.41)                   |
| No education                           | 4.78<br>(2.84,8.04)    | 4.91<br>(2.93,8.23)                    | 6.89<br>(2.53,13.73)                         | 4.72 (2.81,7.93)                                      | 4.66<br>(2.77,7.81)                   | 3.85<br>(3.27,4.53)    | 3.75<br>(3.19,4.42)                    | 2.58<br>(2.04,3.24)                          | 3.8 (3.22,4.48)                                       | 3.85<br>(3.27,4.53)                   |
| <b>Living Environment (Large city)</b> | 1.00                   | 1.00                                   | 1.00                                         | 1.00                                                  | 1.00                                  | 1.00                   | 1.00                                   | 1.00                                         | 1.00                                                  | 1.00                                  |
| Small City                             | 0.91<br>(0.75,1.09)    | 0.98 (0.82,<br>1.17)                   | 1.01<br>(0.84,1.21)                          | 0.78 (0.58,1.04)                                      | 1.004<br>(0.84,1.2)                   | 1.23<br>(1.13,1.32)    | 1.25<br>(1.15,1.35)                    | 1.22<br>(1.13,1.32)                          | 0.97 (0.86,1.1)                                       | 1.2<br>(1.11,1.29)                    |
| Town                                   | 1.19<br>(1.03,1.37)    | 1.2 (1.04,1.38)                        | 1.22<br>(1.05,1.4)                           | 1.31 (1.06,1.62)                                      | 1.23 (1.1,1.41)                       | 1.36<br>(1.27,1.45)    | 1.37<br>(1.29,1.47)                    | 1.36<br>(1.27,1.45)                          | 0.95 (0.86,1.04)                                      | 1.34<br>(1.25,1.43)                   |
| Village                                | 1.4<br>(1.24,1.59)     | 1.28<br>(1.13,1.46)                    | 1.31<br>(1.16,1.49)                          | 1.37 (1.14,1.66)                                      | 1.32<br>(1.16,1.49)                   | 1.07<br>(1.01,1.14)    | 1.09<br>(1.02,1.16)                    | 1.08<br>(1.02,1.15)                          | 0.69 (0.64,0.75)                                      | 1.07<br>(1.005,1.13)                  |
| <b>Caste/Tribe</b>                     | 1.00                   | 1.00                                   | 1.00                                         | 1.00                                                  | 1.00                                  | 1.00                   | 1.00                                   | 1.00                                         | 1.00                                                  | 1.00                                  |



1  
2  
3  
4  
5  
6  
7  
8  
9  
10  
11  
12  
13  
14  
15  
16  
17  
18  
19  
20  
21  
22  
23  
24  
25  
26  
27  
28  
29  
30  
31  
32  
33  
34  
35  
36  
37  
38  
39  
40  
41  
42  
43  
44  
45  
46  
47  
48  
49

|                                 |                     |                      |                     |                     |                     |                     |                     |                     |                       |                     |
|---------------------------------|---------------------|----------------------|---------------------|---------------------|---------------------|---------------------|---------------------|---------------------|-----------------------|---------------------|
| (Other)                         |                     |                      |                     |                     |                     |                     |                     |                     |                       |                     |
| SC                              | 1.5<br>(1.39,1.62)  | 1.55<br>(1.43,1.67)  | 1.54<br>(1.43,1.67) | 1.54 (1.43,1.67)    | 1.4 (1.27,1.55)     | 1.28<br>(1.23,1.33) | 1.28<br>(1.23,1.36) | 1.28<br>(1.23,1.33) | 1.29 (1.24,1.34)      | 1.28<br>(1.22,1.35) |
| ST                              | 2.04<br>(1.86,2.24) | 2.11 (1.92,<br>2.3)  | 2.11<br>(1.93,2.31) | 2.11 (1.93,2.31)    | 1.99<br>(1.79,2.23) | 1.53<br>(1.46,1.6)  | 1.53<br>(1.46,1.61) | 1.53<br>(1.46,1.61) | 1.52 (1.45,1.6)       | 1.48<br>(1.39,1.58) |
| OBC                             | 1.11<br>(1.03,1.2)  | 1.17<br>(1.08,1.26)  | 1.16<br>(1.08,1.26) | 1.16 (1.08,1.25)    | 1.13<br>(1.03,1.24) | 1.03<br>(0.99,1.07) | 1.03<br>(0.99,1.07) | 1.03<br>(0.99,1.07) | 1.03 (0.99,1.07)      | 1.06<br>(1.02,1.12) |
| No Caste or missing             | 0.7<br>(0.6,0.81)   | 0.74<br>(0.64,0.86)  | 0.72<br>(0.62,0.85) | 0.73 (0.62,0.85)    | 1.01 (0.85,1.2)     | 1.02<br>(0.95,1.09) | 1.02<br>(0.96,1.09) | 1.02<br>(0.95,1.09) | 1.01 (0.95,1.08)      | 0.92<br>(0.85,1.01) |
| <b>Survey Year (Yr)</b>         |                     | 1.004<br>(0.98,1.03) | 0.89<br>(0.31,2.56) | 0.67 (0.55,0.83)    | 0.57<br>(0.51,0.63) |                     | 0.81<br>(0.75,0.87) | 0.54<br>(0.4,0.74)  | 0.52 (0.47,0.56)      | 1.02<br>(0.97,1.07) |
| Yr*Richer                       |                     | 0.66 (0.5,0.87)      |                     |                     |                     |                     | 1.09<br>(0.99,1.21) |                     |                       |                     |
| Yr*Middle                       |                     | 0.47<br>(0.36,0.61)  |                     |                     |                     |                     | 1.21 (1.1,1.34)     |                     |                       |                     |
| Yr *Poorer                      |                     | 0.56<br>(0.44,0.72)  |                     |                     |                     |                     | 1.3 (1.18,1.43)     |                     |                       |                     |
| Yr *Poorest                     |                     | 0.71<br>(0.56,0.91)  |                     |                     |                     |                     | 1.5 (1.37,1.64)     |                     |                       |                     |
| Yr *College                     |                     |                      | 1.98<br>(0.6,6.52)  |                     |                     |                     |                     | 2.26<br>(1.6,3.21)  |                       |                     |
| Yr * High School                |                     |                      | 0.77<br>(0.26,2.22) |                     |                     |                     |                     | 1.94<br>(1.41,2.67) |                       |                     |
| Yr * Primary                    |                     |                      | 0.61<br>(0.21,1.75) |                     |                     |                     |                     | 1.74<br>(1.27,2.4)  |                       |                     |
| Yr * No education               |                     |                      | 0.7 (0.24,2.0)      |                     |                     |                     |                     | 1.94<br>(1.41,2.66) |                       |                     |
| Yr*Small City                   |                     |                      |                     | 1.44 (0.99,2.07)    |                     |                     |                     |                     | 1.61 (1.38,1.88)      |                     |
| Yr * Town                       |                     |                      |                     | 0.89 (0.68,1.16)    |                     |                     |                     |                     | 1.94 (1.72,2.19)      |                     |
| Yr * Village                    |                     |                      |                     | 0.92 (0.74,1.15)    |                     |                     |                     |                     | 2.26 (2.06,2.48)      |                     |
| Yr *SC                          |                     |                      |                     |                     | 1.29<br>(1.11,1.51) |                     |                     |                     |                       | 0.99<br>(0.93,1.07) |
| Yr *ST                          |                     |                      |                     |                     | 1.16<br>(0.99,1.36) |                     |                     |                     |                       | 1.07<br>(0.98,1.16) |
| Yr*OBC                          |                     |                      |                     |                     | 1.1 (0.96,1.27)     |                     |                     |                     |                       | 0.95<br>(0.89,1.01) |
| Yr*No Caste                     |                     |                      |                     |                     | 0.45<br>(0.32,0.63) |                     |                     |                     |                       | 1.22<br>(1.07,1.38) |
| <b>Fixed Part of the Model</b>  |                     |                      |                     |                     |                     |                     |                     |                     |                       |                     |
| Overall Chi for Interaction (p- |                     | 19.128<br>(p<0.001)  | 0.041<br>(p=0.99)   | 50.195<br>(p<0.001) | 0.992 (p=0.91)      |                     | 31.96<br>(p<0.0001) | 17.42<br>(p=0.001)  | 157.008<br>(p<0.0001) | 2.665<br>(p=0.615)  |

|                                              |  |                  |                 |                 |                 |  |                   |                  |                   |                   |
|----------------------------------------------|--|------------------|-----------------|-----------------|-----------------|--|-------------------|------------------|-------------------|-------------------|
| value)                                       |  |                  |                 |                 |                 |  |                   |                  |                   |                   |
| <b>Random Part of the Model</b>              |  |                  |                 |                 |                 |  |                   |                  |                   |                   |
| Chi square for Level 3: State (p-value)      |  | 12.91 (p=0.011)  | 12.91 (p=0.011) | 12.91 (p=0.004) | 12.91 (p=0.011) |  | 12.94 (p=0.011)   | 12.94 (p=0.011)  | 12.94 (p=0.004)   | 12.94 (p=0.011)   |
| Chi square for Level 2: Local Area (p-value) |  | 260.98 (p<0.001) | 266.3 (p<0.001) | 264.9 (p<0.001) | 263.5 (p<0.001) |  | 844.91 (p<0.0001) | 839.3 (p<0.0001) | 824.92 (p<0.0001) | 837.64 (p<0.0001) |

\*Models are controlled for age (centered at 29 years), marital status and religion

For peer review only

1  
2  
3  
4  
5  
6  
7  
8  
9  
10  
11  
12  
13  
14  
15  
16  
17  
18  
19  
20  
21  
22  
23  
24  
25  
26  
27  
28  
29  
30  
31  
32  
33  
34  
35  
36  
37  
38  
39  
40  
41  
42  
43  
44  
45  
46  
47  
48  
49

Web Table 1: Prevalence (%) of tobacco smoking, chewing and dual use (smoking and chewing) by living environment, age, religion and marital status among men and women in the National Family Health Surveys 1998-99 and 2005-6

|                                      | Sample Population        |                          | MEN                  |                      |         |                      |                      |         | FEMALE               |                      |                      |                      |        |                      |                      |        |                       |                      |        |     |
|--------------------------------------|--------------------------|--------------------------|----------------------|----------------------|---------|----------------------|----------------------|---------|----------------------|----------------------|----------------------|----------------------|--------|----------------------|----------------------|--------|-----------------------|----------------------|--------|-----|
|                                      |                          |                          | SMOKE                |                      |         | CHEW                 |                      |         | DUAL                 |                      |                      | SMOKE                |        |                      | CHEW                 |        |                       | DUAL                 |        |     |
|                                      | 1998-9                   | 2005-6                   | 1998-9               | 2005-6               | % Δ     | 1998-9               | 2005-6               | % Δ     | 1998-9               | 2005-6               | % Δ                  | 1998-9               | 2005-6 | % Δ                  | 1998-9               | 2005-6 | % Δ                   | 1998-9               | 2005-6 | % Δ |
| <b>Area of residence<sup>1</sup></b> |                          |                          |                      |                      |         |                      |                      |         |                      |                      |                      |                      |        |                      |                      |        |                       |                      |        |     |
| <i>Large city</i>                    | (M) 17,640<br>(F) 16,081 | (M) 19,092<br>(F) 26,272 | 17.7<br>(16.6, 18.9) | 27.2<br>(25.7, 28.8) | 54      | 19.1<br>(17.4, 21.1) | 30.3<br>(28.2, 32.5) | 59      | 6.05<br>(5.4, 6.8)   | 10.2<br>(9.2, 11.3)  | 0.3<br>(0.2, 0.4)    | 0.4<br>(0.3, 0.6)    | 33     | 5.8<br>(4.9, 6.9)    | 4.9<br>(4.1, 5.9)    | -16    | 0.09<br>(0.06, 0.14)  | 0.055<br>(0.03, 0.1) |        |     |
| <i>Small city</i>                    | (M) 8,957<br>(F) 8,573   | (M) 4,723<br>(F) 9,318   | 18.3<br>(16.4, 20.2) | 28.8<br>(26.5, 31.2) | 57      | 19.4<br>(17.1, 22.0) | 34.2<br>(31.1, 37.4) | 76      | 5.8<br>(4.95, 6.8)   | 10.9<br>(9.6, 12.5)  | 0.3<br>(0.2, 0.5)    | 0.5<br>(0.35, 0.7)   | 67     | 5.9<br>(4.8, 7.1)    | 6.6<br>(5.5, 8.1)    | 12     | 0.06<br>(0.03, 0.14)  | 0.09<br>(0.04, 0.2)  |        |     |
| <i>Town</i>                          | (M) 18,837<br>(F) 18,803 | (M) 12,078<br>(F) 21,256 | 19.9<br>(18.6, 21.2) | 30.3<br>(28.4, 32.2) | 52      | 20.6<br>(18.7, 22.5) | 31.1<br>(28.6, 33.7) | 51      | 6.3<br>(5.6, 7.1)    | 10.5<br>(9.4, 11.7)  | 0.6<br>(0.5, 0.8)    | 0.6<br>(0.4, 0.8)    | 0      | 6.7<br>(5.8, 7.8)    | 7.2<br>(6.1, 8.4)    | 8      | 0.2<br>(0.15, 0.3)    | 0.1<br>(0.07, 0.2)   |        |     |
| <i>Village</i>                       | (M) 86,030<br>(F) 87,429 | (M) 33,862<br>(F) 67,296 | 28.9<br>(28.2, 29.6) | 35.2<br>(34.2, 36.2) | 22      | 28.2<br>(27.4, 28.9) | 40.9<br>(39.8, 41.9) | 45      | 11.4<br>(10.9, 11.8) | 15.0<br>(14.3, 15.7) | 2.04<br>(1.85, 2.24) | 1.98<br>(1.75, 2.24) | -3     | 9.8<br>(9.3, 10.3)   | 11.3<br>(10.6, 11.9) | 15     | 0.5<br>(0.43, 0.6)    | 0.4<br>(0.3, 0.5)    |        |     |
| <b>Age-groups</b>                    |                          |                          |                      |                      |         |                      |                      |         |                      |                      |                      |                      |        |                      |                      |        |                       |                      |        |     |
| <i>15-24</i>                         | (M) 50,266<br>(F) 52,299 | (M) 25,511<br>(F) 46,688 | 8.6<br>(8.2, 9.1)    | 19.2<br>(18.4, 20.1) | 12<br>3 | 14.3<br>(13.7, 14.9) | 30.3<br>(29.2, 31.4) | 11<br>2 | 3.5<br>(3.3, 3.8)    | 9.45<br>(8.9, 10.1)  | 0.4<br>(0.31, 0.45)  | 0.3<br>(0.21, 0.36)  | -25    | 3.1<br>(2.8, 3.3)    | 4.4<br>(3.99, 4.7)   | 42     | 0.098<br>(0.07, 0.14) | 0.08<br>(0.05, 0.13) |        |     |
| <i>25-34</i>                         | (M) 38,650<br>(F) 40,764 | (M) 20,794<br>(F) 38,441 | 29.1<br>(28.3, 29.9) | 36.3<br>(35.2, 37.4) | 25      | 29.9<br>(29.1, 30.7) | 43.1<br>(41.9, 44.3) | 44      | 11.5<br>(10.9, 12.0) | 16.0<br>(15.2, 16.8) | 1.4<br>(1.26, 1.62)  | 1.3<br>(1.1, 1.56)   | -7     | 9.0<br>(8.5, 9.5)    | 10.1<br>(9.45, 10.7) | 12     | 0.33<br>(0.27, 0.4)   | 0.23<br>(0.2, 0.3)   |        |     |
| <i>35-49</i>                         | (M) 42,548<br>(F) 37,823 | (M) 23,450<br>(F) 39,013 | 43.4<br>(42.5, 44.2) | 44.1<br>(42.9, 45.2) | 1.6     | 35.3<br>(34.4, 36.2) | 40.2<br>(39.0, 41.4) | 14      | 15.7<br>(15.1, 16.3) | 15.2<br>(14.4, 16.0) | 3.4<br>(3.1, 3.8)    | 3.2<br>(2.84, 3.57)  | -6     | 16.5<br>(15.8, 17.3) | 15.7<br>(14.9, 16.4) | -5     | 0.9<br>(0.76, 1.02)   | 0.6<br>(0.5, 0.7)    |        |     |
| <b>Marital Status</b>                |                          |                          |                      |                      |         |                      |                      |         |                      |                      |                      |                      |        |                      |                      |        |                       |                      |        |     |
| <i>Currently married</i>             | (M) 77,233<br>(F) 95,398 | (M) 40,529<br>(F) 87,754 | 36.9<br>(36.2, 37.6) | 40.6<br>(39.7, 41.5) | 10      | 33.7<br>(32.9, 34.4) | 42.9<br>(41.9, 43.9) | 27      | 13.9<br>(13.5, 14.4) | 15.9<br>(15.3, 16.6) | 1.8<br>(1.6, 1.94)   | 1.8<br>(1.6, 2.02)   | 0      | 9.8<br>(9.3, 10.3)   | 10.9<br>(10.4, 11.5) | 11     | 0.43<br>(0.37, 0.5)   | 0.3<br>(0.26, 0.4)   |        |     |

|                                |                                  |                                 |                         |                          |         |                          |                              |         |                         |                             |                       |                         |     |                         |                          |     |                         |                         |
|--------------------------------|----------------------------------|---------------------------------|-------------------------|--------------------------|---------|--------------------------|------------------------------|---------|-------------------------|-----------------------------|-----------------------|-------------------------|-----|-------------------------|--------------------------|-----|-------------------------|-------------------------|
| <i>Single</i>                  | (M) 52,443<br>(F) 29,623         | (M) 28,377<br>(F) 30,606        | 7.6<br>(7.3,<br>8.04)   | 18.9<br>(18.2,<br>19.7)  | 14<br>9 | 12.5<br>(11.9,12<br>.9)  | 27.4<br>(26.4,<br>28.4)      | 11<br>9 | 2.9<br>(2.7,3<br>.2)    | 8.6<br>(8.1,<br>9.2)        | 0.3<br>(0.22,0<br>.4) | 0.09<br>(0.06,0<br>.14) | -70 | 1.9<br>(1.8,2.2<br>)    | 2.8<br>(2.5,3.<br>2)     | 47  | 0.12<br>(0.08,0<br>.18) | 0.03<br>(0.01,0<br>.06) |
| <i>Widowed</i>                 | (M) 1,070<br>(F) 4,038           | (M) 415<br>(F) 3,909            | 48.7<br>(45.1,5<br>2.3) | 50.1<br>(43.9,<br>56.3)  | 2.8     | 41.6<br>(38.0,45<br>.3)  | 59.5<br>(53.2,<br>65.6)      | 43      | 19.5<br>(16.8,<br>22.5) | 23.7<br>(18.<br>7,29<br>.6) | 4.7<br>(3.86,<br>5.6) | 3.5<br>(2.78,4<br>.3)   | -26 | 21.3<br>(19.7,22<br>.9) | 18.5<br>(16.9,2<br>0.2)  | -13 | 1.4<br>(1.05,1<br>.89)  | 0.9<br>(0.6,1.<br>4)    |
| <i>Divorced/<br/>separated</i> | (M) 718<br>(F) 1,827             | (M) 434<br>(F) 1,873            | 41.7<br>(37.2,4<br>6.4) | 46.6<br>(39.9,<br>53.3)  | 12      | 33.4<br>(29.01,<br>38.1) | 55.9<br>(49.0<br>3,62.<br>7) | 67      | 15.7<br>(12.5,<br>19.5) | 25.2<br>(19.<br>7,31<br>.6) | 2.5<br>(1.8,3.<br>6)  | 1.6<br>(1.01,2<br>.6)   | -36 | 18.1<br>(15.9,20<br>.6) | 18.6<br>(16.4,<br>21.01) | 3   | 0.31<br>(0.13,0<br>.75) | 0.6<br>(0.3,1.<br>2)    |
| <b>Religion<sup>2</sup></b>    |                                  |                                 |                         |                          |         |                          |                              |         |                         |                             |                       |                         |     |                         |                          |     |                         |                         |
| <i>Hindu</i>                   | (M) 100,339<br>(F) 99,430        | (M) 51,174<br>(F) 89,888        | 26.1<br>(25.5,2<br>6.7) | 33.01<br>(32.2,<br>33.8) | 27      | 26.6<br>(26.0,<br>27.3)  | 38.2<br>(37.3,<br>39.1)      | 44      | 10.2<br>(9.8,1<br>0.5)  | 13.7<br>(13.<br>2,14<br>.3) | 1.5<br>(1.4,1.<br>7)  | 1.5<br>(1.35,1<br>.7)   | 0   | 8.8<br>(8.3,9.2<br>)    | 9.6<br>(9.1,10<br>.2)    | 9   | 0.37<br>(0.31,0<br>.43) | 0.25<br>(0.2,0.<br>3)   |
| <i>Muslim</i>                  | (M) 16,278<br>(F) 16,215         | (M) 9,145<br>(F) 16,731         | 28.3<br>(26.7,2<br>9.9) | 36.2<br>(34.3,<br>38.2)  | 28      | 23.4<br>(21.7,25<br>.1)  | 37.4<br>(35.0<br>2,39.<br>8) | 60      | 9.5<br>(8.7,1<br>0.5)   | 13.1<br>(11.<br>9,14<br>.5) | 1.9<br>(1.6,2.<br>3)  | 1.73<br>(1.25,2<br>.4)  | -9  | 9.1<br>(8.3,9.9<br>)    | 9.9<br>(8.9,10<br>.9)    | 9   | 0.5<br>(0.37,0<br>.7)   | 0.4<br>(0.3,0.<br>7)    |
| <i>Christian</i>               | (M) 8,055<br>(F) 8,547           | (M) 6,250<br>(F) 10,974         | 28.2<br>(25.9,3<br>0.5) | 33.1<br>(29.9,<br>36.4)  | 17      | 17.5<br>(15.1,<br>20.1)  | 29.1<br>(25.0<br>1,33.<br>5) | 66      | 8.2<br>(6.9,9<br>.6)    | 12.7<br>(10.<br>4,15<br>.5) | 2.4<br>(1.7,3.<br>3)  | 1.3<br>(0.98,1<br>.62)  | -46 | 9.9<br>(8.4,11.<br>6)   | 10.7<br>(9.1,12<br>.5)   | 8   | 0.98<br>(0.72,1<br>.33) | 0.6<br>(0.5,0.<br>7)    |
| <i>Others</i>                  | (M) 6,792<br>(F) 6,694           | (M) 3,186<br>(F) 6,549          | 11.1<br>(9.5,12<br>.8)  | 16.2<br>(14.2,<br>18.4)  | 46      | 19.3<br>(17.1,21<br>.7)  | 26.0<br>(23.1,<br>29.2)      | 35      | 4.4<br>(3.4,5<br>.6)    | 6.5<br>(5.2,<br>8.0)        | 0.6<br>(0.4,<br>0.9)  | 0.4<br>(0.2,0.<br>65)   | -33 | 7.5<br>(5.8,9.6<br>)    | 7.6<br>(6.2,9.<br>4)     | 1   | 0.27<br>(0.13,0<br>.55) | 0.2<br>(0.1,0.<br>6)    |
| <i>Total</i>                   | (M)<br>131,464<br>(F)<br>130,886 | (M)<br>69,755<br>(F)<br>124,142 |                         |                          |         |                          |                              |         |                         |                             |                       |                         |     |                         |                          |     |                         |                         |

<sup>1</sup>Large city: urban population ≥1 million; Small city: 100000-1 million; Town: ≤100000 million

<sup>2</sup>Others include Sikh, Buddhist, Jain, Jewish, Zoroastrian and Others

\*Percentage change (% Δ) numbers have been rounded to the nearest integer. Estimates are not age-standardized

1  
2  
3  
4  
5  
6  
7  
8  
9  
10  
11  
12  
13  
14  
15  
16  
17  
18  
19  
20  
21  
22  
23  
24  
25  
26  
27  
28  
29  
30  
31  
32  
33  
34  
35  
36  
37  
38  
39  
40  
41  
42  
43  
44  
45  
46  
47  
48  
49  
50  
51  
52  
53  
54  
55  
56  
57  
58  
59  
60

Figure 1: Percentage change in smoking among men and women by education level and wealth quintiles

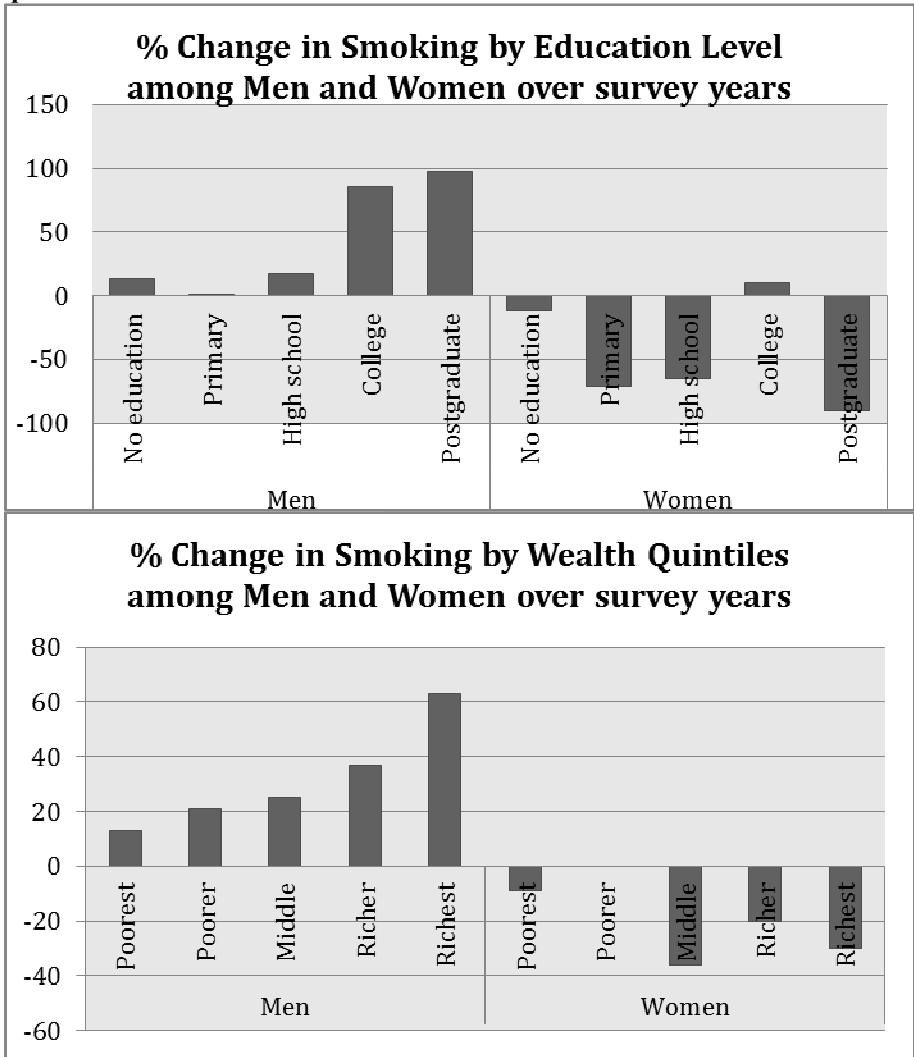

Figure 2: Percentage change in chewing among men and women by education level and wealth quintiles

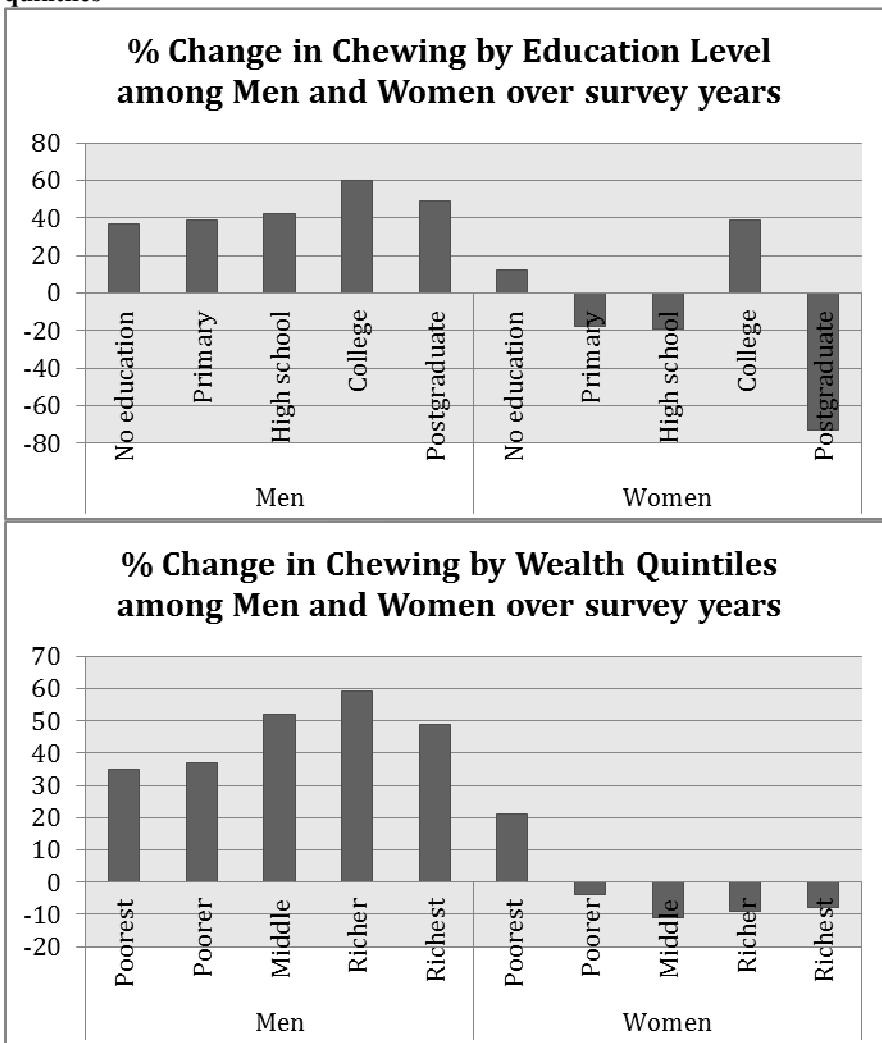

Only

1  
2  
3  
4  
5  
6  
7  
8  
9  
10  
11  
12  
13  
14  
15  
16  
17  
18  
19  
20  
21  
22  
23  
24  
25  
26  
27  
28  
29  
30  
31  
32  
33  
34  
35  
36  
37  
38  
39  
40  
41  
42  
43  
44  
45  
46  
47  
48  
49  
50  
51  
52  
53  
54  
55  
56  
57  
58  
59  
60

1  
2  
3  
4  
5  
6  
7  
8  
9  
10  
11  
12  
13  
14  
15  
16  
17  
18  
19  
20  
21  
22  
23  
24  
25  
26  
27  
28  
29  
30  
31  
32  
33  
34  
35  
36  
37  
38  
39  
40  
41  
42  
43  
44  
45  
46  
47  
48  
49

Figure 3: Probability of smoking and chewing among men and women by education and wealth

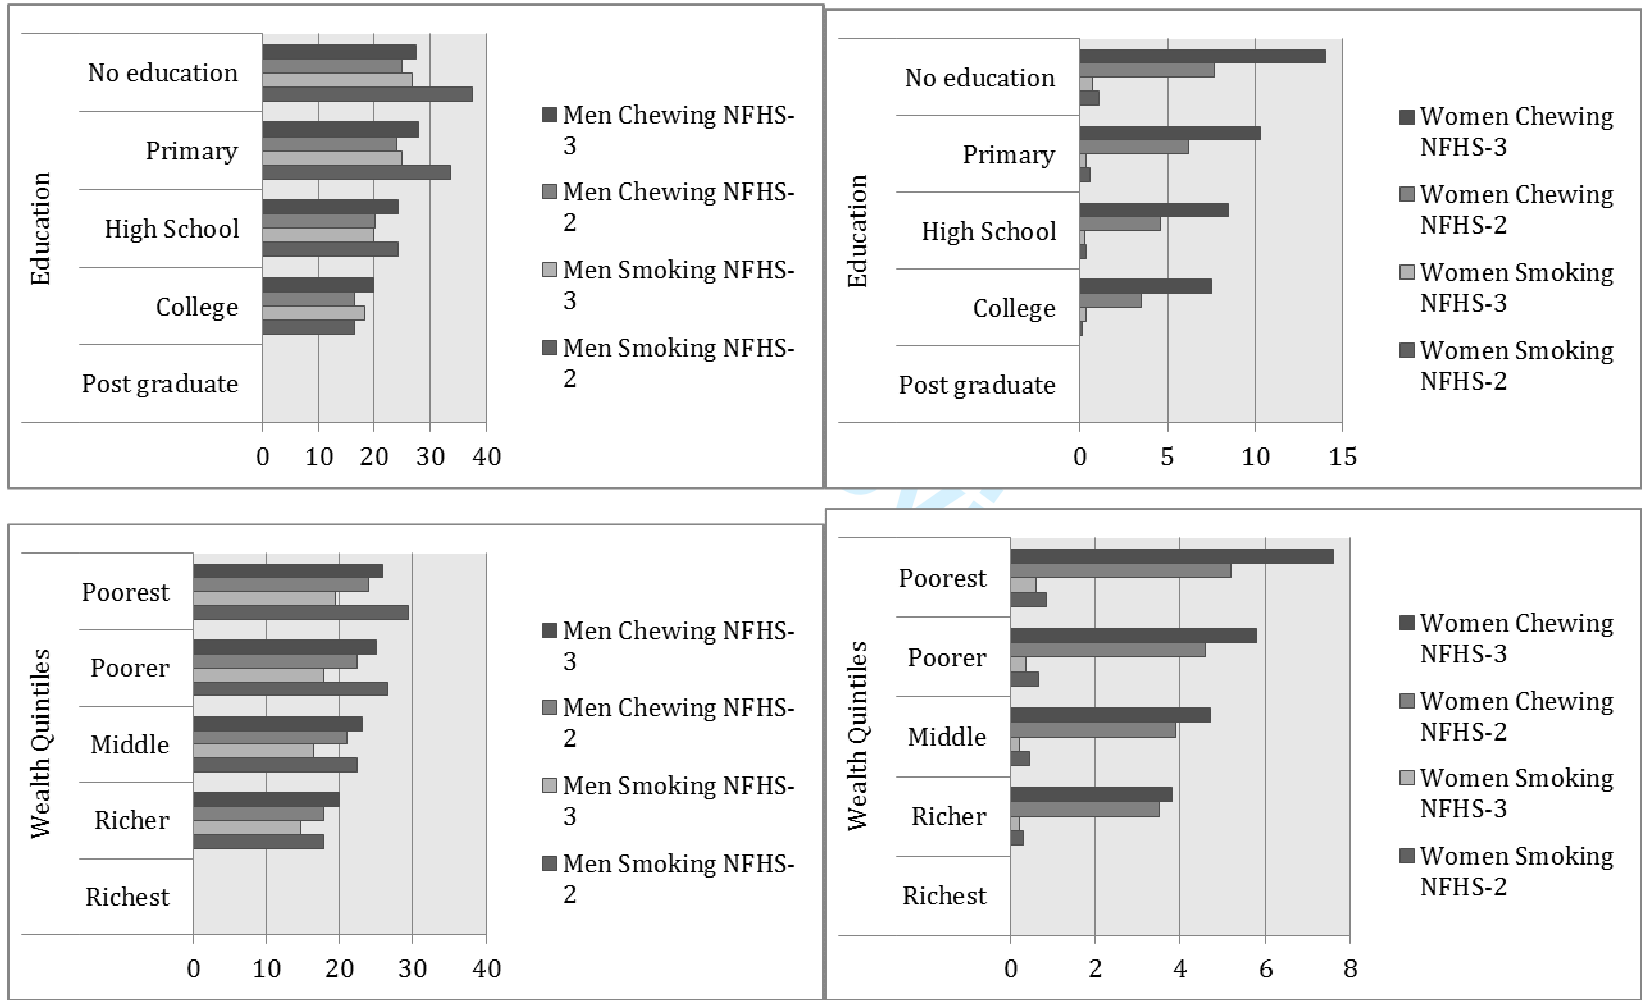

## ACKNOWLEDGEMENTS

We acknowledge the support of Macro International Inc (Washington, DC) for providing access to the surveys.

**Competing Interests:** None

**Financial Disclosures:** None.

**Funding/Support:** There was no specific funding for this study. NB is supported by the Presidential Scholarship at Harvard University. SA is supported by a Wellcome Trust Strategic Award Grant No. Z/041825. CM conducted this work during a Study Abroad Fellowship funded by the Leverhulme Trust. CM is also funded by the Higher Education Funding Council for England and the National Institute for Health Research.



**References Cited:**

1. Reddy KS, Prabhakaran D, Jeemon P, Thankappan KR, Joshi P, Chaturvedi V, Ramakrishnan L & Ahmed F. "Educational status and cardiovascular risk profile in Indians." *PNAS* 104.41 (2007): 16263-16268.
2. WHO (2008). *WHO Report on the Global Tobacco Epidemic, 2008: The MPOWER package*. Geneva, World Health Organization, 2008.
3. Murray CJL, & Lopez, AD. "Global mortality, disability and the contribution of risk factors: Global Burden of Disease Study." *The Lancet* 349 (1997a): 1436-42.
4. Murray CJL, & Lopez AD. "Alternative projections of mortality and disability by cause 1990-2020: Global Burden of Disease Study." *The Lancet* 349 (1997b): 1498-1504.
5. Rani M, Bonu S, Jha P, Nguyen S, Jamjoum L. "Tobacco use in India: prevalence and predictors of smoking and chewing in a national cross sectional household survey." *Tobacco Control* 12.4 (2003): e4.
6. Subramanian SV, Nandy S, Kelly M, Gordon D & Smith GD. "Patterns and distribution of tobacco consumption in India: cross sectional multilevel evidence from the 1998-9 National Family Health Survey." *BMJ* 328.7443 (2004): 801-6.
7. John RM, Rao RK, Rao MG, Moore J, Deshpande RS, Sengupta J, Selvaraj S, Chaloupka FJ, Jha P. *The economics of tobacco and tobacco taxation in India*. Paris: International Union against Tuberculosis and Lung Disease, 2010.
8. IIPS, & ORC Macro. *National Family Health Survey (NFHS-2), 1998-99*. Data. Mumbai, India: IIPS, 2000.
9. IIPS, & ORC Macro. *National Family Health Survey (NFHS-3), 2005-06: India: Vol I*. Data. Mumbai, India: IIPS, 2007.
10. Lopez AD, Collishaw NE, Piha T. "A descriptive model of the cigarette epidemic in developed countries." *Tobacco Control* 3 (1994): 242-247.
11. Thun M, Peto R, Boreham J, Lopez AD. "Stages of the cigarette epidemic on entering its second century." *Tobacco Control* 21 (2011): 96-101.
12. Sinha DN, Palipudi KM, Rolle I, et al. (2011). Tobacco use among youth and adults in member countries of South-East Asia region: review of findings from surveys under the Global Tobacco Surveillance System. *Indian J Public Health*. 2011; 55(3): 169-76
13. GOI. (2010). *Global Adult Tobacco Survey. GATS India 2009-10*. Report. Ministry of Health & Family Welfare, Government of India. Available online.
14. Jha P, Jacob B, Gajalakshmi V, Gupta PC et al. (2008). A nationally representative case-control study of smoking and death in India. *N Engl J Med*. 2008;358:1137-47
15. Dikshit R, Gupta PC, Ramasundarahettige C, et al. (2012). Cancer mortality in India: a nationally representative survey. *The Lancet*, Mar 28. Epub. DOI:10.1016/S0140-6736(12)60358-4
16. Critchley JA, Unal B. (2003). Health effects associated with smokeless tobacco: a systematic review. *Thorax* 2003; 58:435-443
17. WHO (2008). *WHO Report on the Global Tobacco Epidemic, 2008: The MPOWER package*. "Gender, Women and the Tobacco Epidemic. Summary and Overview". Geneva, World Health Organization, 2008.
18. Fernandez E, Garcia M, Schiaffino A, Borrás JM, Nebotm & Segura A. "Smoking initiation and cessation by gender and educational level in Catalonia, Spain." (2002).
19. Viswanath K, Ackerson LK, Sorensen G, et al. (2010). Movies and TV influence tobacco use in India: findings from a national survey. *PLoS One*. 2010;5(6):e11365
20. Stigler M, Dhavan P, Van Dusen D, et al. (2010). Westernization and tobacco use among young people in Delhi, India. *Soc Sci Med*. 2010; 71(5): 891-7
21. Shah PB, Pednekar MS, Gupta PC, et al. (2008). The relationship between tobacco advertisements and smoking status of youth in India. *Asian Pac J Cancer Prev*. 2008;9(4):637-42
22. Ebrahim S, . "Surveillance and Monitoring for Chronic Diseases: A Vital Investment." *The National Medical Journal of India*. Editorial 22.3 (2011): 129-132.
23. Palipudi KM, Gupta PC, Sinha DN, et al. (2012). Social determinants of health and tobacco use in thirteen low and middle income countries: evidence from Global Adult tobacco Survey. *Plos One*. 2012. 7(3):e33466.

1  
2  
3  
4  
5  
6  
7  
8  
9  
10  
11  
12  
13  
14  
15  
16  
17  
18  
19  
20  
21  
22  
23  
24  
25  
26  
27  
28  
29  
30  
31  
32  
33  
34  
35  
36  
37  
38  
39  
40  
41  
42  
43  
44  
45  
46  
47  
48  
49  
50  
51  
52  
53  
54  
55  
56  
57  
58  
59  
60

**Are socioeconomic disparities ~~patterns~~ in tobacco consumption increasing over time in India? A repeated cross-sectional multilevel analysis: Examining trends from NFHS 2 and 3 in light of the Cigarette Epidemic Model**

**Corresponding Author:**

SV Subramanian  
Professor of Population Health and Geography Department of Society, Human Development and Health, Harvard School of Public Health  
7<sup>th</sup> Floor, Kresge Building, 677 Huntington Ave, Boston MA 02115, USA  
Phone: +1 617 432 6299  
Fax: +1 617 432 3123  
Email: [svsubram@hsph.harvard.edu](mailto:svsubram@hsph.harvard.edu)

**Authors:**

Nandita Bhan<sup>1</sup>  
Swati Srivastava<sup>2</sup>  
Sutapa Agrawal<sup>3</sup>  
Malavika Subramanyam<sup>4</sup>  
Christopher Millett<sup>5</sup>  
Sakthivel Selvaraj<sup>2</sup>  
SV Subramanian<sup>1</sup>

<sup>1</sup> Department of Society, Human Development and Health, Harvard School of Public Health, Harvard University, Boston, USA

<sup>2</sup> Public Health Foundation of India (PHFI), New Delhi, India

<sup>3</sup> South Asia Network for Chronic Diseases (SANCD), New Delhi, India

<sup>4</sup> Center for Integrative Approaches to Health Disparities, School of Public Health, University of Michigan, Michigan, USA

<sup>5</sup> School of Public Health, Imperial College London, London, UK

**Word Count: ~~1375~~ 2873 words**

1  
2  
3  
4  
5  
6  
7  
8  
9  
10  
11 **ABSTRACT: (298250 words)**

12 **Objectives:** India bears a significant portion of the global tobacco burden with high  
13 prevalence of tobacco among men (47%) and women (14%). This study examines the  
14 socioeconomic patterning of tobacco use and identifies the changing gender and  
15 socioeconomic dynamics in light of the Cigarette Epidemic Model. Smoking, chewing  
16 and dual use (smoking and chewing) in India show socioeconomic and spatial gradients  
17 among both men and women.

Formatted: Font: Italic

18  
19  
20  
21 **Design:** Population-based cCross-sectional sSurveys, NFHS -2 and 3, India

22 Setting & participants: 131,464 men and 130,886 women (NFHS-2) and 69,755 men and  
23 124,142 women (NFHS -3) in India- ages 15-49 years.

24  
25  
26 **Outcomes & methods:** Outcomes include smoking (cigarettes, bidis and pipes/cigar),  
27 chewing tobacco (paan masala, gutkha or other chewed forms of tobacco) and dual use  
28 examined by education, wealth living environment and caste/tribe status. Survey-  
29 weighted age sStandardized prevalence and percentage change were estimated. Pooled  
30 relative percentage change over time in smoking, chewing tobacco and Dual Use of  
31 tobacco. mMulti-level models estimate the effect of socioeconomic covariates on the log  
32 odds of tobacco used by gender, estimating fixed and random parameters. -with state,  
33 local area and individual as analytical levels were used to estimate probability of smoking  
34 and chewing, and significance of the trend.

Formatted: Font: Italic

Formatted: Font: Italic

Formatted: Font: Italic

35  
36  
37  
38  
39 **Findings:** Among men (2005-6), SES gradients in smoking (Illiterate: 44% vs.  
40 Postgraduates: 15%) and chewing (Illiterate: 47% vs. Postgraduate:19%) were observed.  
41 Similar SES gradients observed by education, living environment and caste. Chewed  
42 tobacco prevalence among women showed inverse SES gradients comparing the illiterate  
43 (7.4%) vs. postgraduate (0.33%), and poorest (17%) vs. richest (2%) quintiles. However,  
44 change estimates showed greater percentage rises in smoking and chewing respectively  
45 by higher SES groups among men – postgraduates (98%) and richest (49%) compared to  
46 those with high schooling only (17%) and poorest (35%). Among women, higher  
47 educated showed larger declines - 90% (postgraduates) vs. 12% (illiterates). Younger men  
48 (15-24 years) showed increasing tobacco use (Smoking: 123% and Chewing:112%).

Older women (35-49 years) show higher prevalence 3.2% compared to 0.3% (15-24 years) for smoking.

a) increases in tobacco consumption among men with sharper inequalities in smoking compared to chewing; higher risks for the less educated, poorer, rural and lower caste populations, b) greater change in risk and percentage increases among high educated, urban, richer groups, previously unreported, c) low and declining smoking risks and unclear patterns in chewing among women, d) significant increases in smoking and chewing prevalence among younger men, and in chewing prevalence among younger women.

**Conclusions:** Indian tobacco use patterns show significant diversions from Our results add qualitatively to the propositions of the *Cigarette Epidemic Model* showing significant diversions in the patterns in India compared to developed countries— from gender and socioeconomic perspectives. Given the twin burden of smoking and chewing and their unique challenges, we recommend Separate analyses by tobacco type is needed to further to understand social determinants of tobacco use the unique drivers of smoking and chewing in India.

## Article Summary

### Article Focus

- India bears a significant burden of tobacco consumption, with high prevalence of smoking and chewing among men & women.
- , and p Previous studies have established a unique social and spatial gradient in tobacco use. However, no studies have yet reported estimates for changing patterns in tobacco use prevalence or relative risk over time.
- consumption.
- No studies have provided estimates and inferences on changing trends in tobacco consumption over time, either through prevalence or relative risks.

Formatted: No bullets or numbering

Formatted: Indent: Left: 0.25", No bullets or numbering

- This study estimates socioeconomic ~~patterns trends~~ and ~~examines~~ the changing ~~gender and socioeconomic~~ dynamics of tobacco ~~use consumption~~ in light of the *Cigarette Epidemic Model*.

### Key Messages

- ~~Among men, higher prevalence of smoking and chewing for less educated, poorer, rural and lower caste. Sharp and rising inequalities by survey year, but percentage change shows increases are greater among higher SES groups – higher education, urban, richer populations, previously unreported.~~
- ~~Low and declining risks of smoking and chewing among women. Higher rates of chewing compared to smoking. Increase in smoking with urbanization for women. Greater declines over time for higher educated women.~~
- ~~Significant changing trend by wealth, education and living environment in smoking among men and in chewing among women. Increases in smoking prevalence among younger men (15-24 years) and chewing among younger women (15-24 years).~~
- ~~Sharper and rising inequalities for smoking compared to chewing among men, versus low and declining risks for women.~~
- ~~Higher risks of smoking and chewing among men for the less educated, poorer, rural and lower caste populations, but greater increases in risks among the high educated, urban, richer groups, previously unreported.~~
- ~~significant increases in smoking and chewing prevalence among younger men, and in chewing prevalence among younger women.~~

### Strengths & limitations

- ~~1. First systematic examination of socioeconomic ~~patterns trends~~ in tobacco ~~use consumption~~ in India, highlighting SES gradients in use and risks among vulnerable populations.~~
  - ~~2. Large sample, representative and generalizable surveys providing repeated and comparable estimates over time, and linking it to a previously developed~~
- ~~1. model to understand tobacco consumption transition.~~

Formatted: No bullets or numbering

2. ~~Estimates for relative risk, age standardised prevalence and percentage change over time, highlighting vulnerable groups.~~
3. Limitations: a) cross-sectional data, limiting scope for causal inference, b) lack of data by tobacco -include inability to differentiate between type of cigarette and estimator the volume of consumption-use, c) data from a reproductive health survey may suffer from social desirability bias.

Formatted: Indent: Left: 0.25", No bullets or numbering

## INTRODUCTION

Global estimates indicate that one in ten adult deaths can be attributed to tobacco consumption, leading to approximately 5 million global deaths per year[1-4]. Of these, 2.4 million deaths occur in developing countries. India bears a significant portion of this global tobacco burden[2-3-4]. Consumption of both smoked and smoke-less (chewed and inhaled) forms of tobacco is highly prevalent among men (47%) and women (14%)[54]. However, previous studies have indicated that tobacco use, like other nNon-communicable dDisease risk factors, is unequally distributed across different social determinants in India – education, caste and wealth – among both men and women[1,4,5-7-6], indicating a distinct “economic and spatial distribution” in tobacco use[65]. No studies have yet systematically examined patternstrends and changes in the prevalence of tobacco consumption in India by socioeconomic factors over time.

In this study, we aim to ~~This research paper~~ provides estimates and inferences on the changing gradient of tobacco consumption in India, analysing prevalence and odds ratio patterns from the National Family Health Surveys[7-8-9]. We discuss our findings in light of the Cigarette Epidemic Model[9-10-11] and examine what populations show higher and lower prevalence of tobacco consumption over time.

## METHODS

Data was analysed from two rounds of the Indian National Family Health Surveys (NFHS 2 & 3) conducted during 1998-9 and 2005-6. The NFHS is a nationally representative cross-sectional survey that is collected and managed by the Indian Institute of Population Sciences (IIPS) in Mumbai, India. (NFHS 2 & 3) These surveys provide vital sources of information on demographic, health and socioeconomic behaviour of Indian households. Data from men and women in the age group of 15-49 years was used from both survey rounds to ensure comparability. Data is representative of all Indian states (except the small Union Territories), hence covering almost was analysed and survey-weighted age-standardized prevalence estimates together with percentage change were estimated. Analysis was restricted to men and women in the age group 15-49 years for comparability. NFHS data covers 99% of the country's India's population. The surveys were collected using multistage cluster random sampling techniques. Rural and urban areas are sampled separately and a uniform sample design was followed in each state; states and PSUs are considered as levels. Individual questionnaires for men and women were used to interview usual residents of the household or visitors who stayed in the house the night before. Further and is representative of all states. Details on sample design, including sampling framework and survey implementation, are provided in the basic survey reports by IIPS[7-8-9].

Outcomes of interest Dependent variables in the analyses included **smoking** (cigarettes, *bidis*<sup>1</sup> and pipes/cigar), **chewing tobacco** (*paan masala*<sup>2</sup>, *gutkha*<sup>3</sup> or other chewed forms of tobacco) and **dual use** (consuming both smoked and smoke-less forms) of tobacco. NFHS-3 provides details on the different types of smoked and smokeless tobacco products, but this information was unavailable in NFHS-2. The main covariates of interest were Independent variables in the analysis include age categories, marital status and education level at the individual level, and household wealth, area of residence (urban/rural), religion and caste/tribe status at the household level (*Variable definitions are provided in Table 1*). Survey-weighted age-standardised prevalence estimates of

<sup>1</sup> *Bidis* are local inexpensive cigarettes that are thinner and contain tobacco flakes rolled inside *tendu* leaves. Bidis are often smoked by poorer populations.

<sup>2</sup> *Paan Masala* is a powdered preparation of betel leaves combined with cured tobacco and/or areca nut, which has stimulating properties.

<sup>3</sup> *Gutkha* is a savoury or sweet preparation containing areca nut, tobacco, catechu, paraffin and slaked lime.

Formatted: Font: 8 pt

Formatted: Font: 8 pt, Italic

Formatted: Font: 8 pt

Formatted: Font: 8 pt, English (U.S.)

Formatted: Font: 8 pt, Italic

Formatted: Font: 8 pt

Formatted: Font: 8 pt, English (U.S.)



1  
2  
3  
4  
5  
6  
7  
8 smoking, chewing and dual use of tobacco along with percentage change were calculated.  
9 Pooled mMulti-level models with state, local area and individual as analytical levels were  
10 used to estimate the effect of wealth, education, living environment and caste on the log  
11 odds ~~and probability~~ of smoking and chewing ~~by education and wealth~~ among men and  
12 women. Regression models are adjusted for age, religion and marital status. Survey year  
13 was used in the interaction terms to estimate a time trend in socioeconomic determinants  
14 of tobacco. Tests for trend including joint tests for significance of fixed parameter~~time~~  
15 trends and significance of random parameters. ~~effects were estimated.~~ Model estimates  
16 were maximum likelihood-based using the Iterative Generalized Least-Squares (IGLS)  
17 algorithm as implemented within the MLwin software programme (version 2.23)~~and~~  
18 controlled for age, marital status and religion.  
19  
20  
21  
22  
23  
24  
25  
26  
27

## 28 RESULTS

29 Data used in this analysis covers 131,464 men and 130,886 women residing in 92,486  
30 households in NFHS-2 and 69,755 men and 124,142 women residing in 109,041  
31 households in NFHS-3, with an overall response rate of 96% for NFHS-2 and 98% for  
32 NFHS-3 (Table 1). Change in pPrevalence ~~(%)~~ of smoking, chewing and dual ~~use~~  
33 of tobacco over two survey rounds are presented by the three primary markers of  
34 socioeconomic status - by education, wealth and caste (-is shown in table 1) along with,  
35 and figures 1-3 show the percentage change estimates. Estimates by living environment,  
36 marital status, age and religion are presented in the appendix (Web Table 1). ~~in and~~  
37 ~~probability of smoking and chewing by wealth and education among men and women.~~  
38 ~~Additional results on the multilevel models and tests of significance for trends are~~  
39 ~~presented in web tables 1-2, while web table 3 presents the prevalence of smoking and~~  
40 ~~chewing by age, residence, religion and marital status.~~  
41  
42  
43  
44  
45  
46  
47

48 Among men, the prevalence of tobacco use (smoking, chewing and dual use) ~~of tobaceo~~  
49 are seen to ~~unanimously~~ increase across all socioeconomic groups. For instance,  
50 smoking rises from 35.5% to 40.6% in the fifth (poorest) quintile, 30.6% to 36.5% in the  
51  
52  
53  
54  
55  
56  
57  
58  
59  
60



1  
2  
3  
4  
5  
6  
7  
8  
9  
10  
11  
12  
13  
14  
15  
16  
17  
18  
19  
20  
21  
22  
23  
24  
25  
26  
27  
28  
29  
30  
31  
32  
33  
34  
35  
36  
37  
38  
39  
40  
41  
42  
43  
44  
45  
46  
47  
48  
49  
50  
51  
52  
53  
54  
55  
56  
57  
58  
59  
60

fourth quintile, 25.6 to 31.4% in the middle quintile, 19.3% to 25.8% in the second quintile and 11.9% to 19.9% in the first (richest) quintile (table 1). Chewed tobacco use increased from 34.4% to 47.1% among the illiterate populations, 30.2% to 41.9% among those with primary schooling only, 23.3% to 33.1% among those with high school education, 14.9% to 23.9% among those with college education and 12.4% to 18.5% among those with postgraduate degree. Higher ~~While the relative~~ prevalence of tobacco use among men in each survey round is seen for ~~is higher among~~ socioeconomically disadvantaged groups – with less educated, lower wealth, living in rural areas or lower caste showing an inverse SES gradient; however, greater ~~higher~~ proportional increases in prevalence over time are ~~is~~ seen among ~~social groups with~~ higher SES groups. For instance, higher absolute smoking prevalence in NFHS 3 is seen among men in lower wealth quintiles compared to those in higher wealth quintiles (41% for fifth (poorest) quintile and 37% for fourth quintile, compared to 20% in first (richest) quintile and 26% in second quintile); higher percentage increases in smoking are recorded among first (E.g. ~~change in smoking prevalence among men in the richest~~ quintile (~~is~~ 63%) and second quintile (37%) compared to the fourth quintile (21%) and fifth (~~while that in the poorest~~) quintile (~~is~~ 13%). Similar trend is seen for education with a 98% increase in prevalence among those with postgraduate education and 13% increase in prevalence among those with no education over the two survey rounds. Sharper inequalities with higher inter-group differences are seen for smoking compared to chewing. Prevalence of chewing among men in the richest quintile and with postgraduate education each increased by 49%, while that for the poorest increased by 35% and for those with no education increased by 37%.

Socioeconomic patterns for tobacco use among women differ distinctly. Overall p; similarly ~~smoking prevalence among those with post graduate level of education increases by 98% and those with no education increases by 13%. Sharper inequalities with greater inter-group differences are seen in smoking compared to chewing. Prevalence of chewing among men in the richest quintile and with post graduate education increased by 49%, while that for the poorest increased by 35% and for the illiterate increased by 37%. Prevalence rates of trends tobacco use among women are~~

1  
2  
3  
4  
5  
6  
7  
8 were less clear with overall rates staying significantly lower than compared to men. In  
9 2005-06, prevalence of smoking and chewing among women with no education was 2.3%  
10 and 13.3% respectively, while the same for men was 43.9% and 47.1% respectively (table  
11 1). Women in most SES categories showed a declining trend for tobacco use, and only  
12 scheduled caste women and those with college education showed small increases in  
13 smoking and chewing. Higher and more consistent declines in prevalence are seen for  
14 education, compared to wealth and caste/tribe status. For instance, women with  
15 postgraduate education noted a 90% decrease in smoking and a 73% decrease in chewing  
16 (table 1). Women in the first (richest) quintile showed a decline of 30% for smoking and  
17 8% for chewing (table 1). Results by area of residence (Web Table 1) show an increase in  
18 risks for tobacco use with urbanization among both men and women, except in the  
19 prevalence of chewed tobacco among women. Figures 1-2 show the percentage change in  
20 smoking and chewing by education and wealth for men and women reflecting findings  
21 from table 1.  
22  
23  
24  
25  
26  
27  
28  
29

30 Tables 2-3 present results from pooled multilevel models showing odds ratios for  
31 smoking and chewing by education, wealth, living environment and caste, along with  
32 interactions with survey year. Gradients in odds ratios (95% CI) are seen by all four  
33 markers of SES among men and women for smoking and chewing with sharper  
34 inequalities seen for education and wealth, compared to other markers. Controlling for  
35 wealth, caste and living environment and compared to those with postgraduate education,  
36 the odds ratio of smoking for men with no education: 3.18 (95% CI: 2.96,3.43), with  
37 primary education: 2.73 (95% CI: 2.54,2.94), with high school education: 1.81 (95% CI:  
38 1.69,1.85) and with college education: 1.38 (95% CI: 1.28,1.49). Controlling for  
39 education, caste and living environment and compared to the first (richest) quintile, odds  
40 ratio for chewing in the second quintile: 1.43 (95% CI: 1.38,1.48), middle quintile 1.75  
41 (95% CI: 1.68,1.82), fourth quintile: 1.92 (95% CI: 1.84,2.01) and fifth (poorest) quintile:  
42 2.1 (95% CI: 1.99,2.2). Interaction terms in the two tables provide effect estimates for  
43 change over the two survey rounds. Among men, significant parameters for interaction  
44 terms for smoking are seen by wealth, education (except college educated) and living  
45 environment (except small city); and for chewing by wealth, higher education and by  
46  
47  
48  
49  
50  
51  
52  
53  
54  
55  
56  
57  
58  
59  
60

1  
2  
3  
4  
5  
6  
7  
8  
9 residence in towns. The joint test for interaction of fixed terms is significant for smoking  
10 by wealth (Joint test: 174.31,  $p < 0.001$ ), education (Joint test: 13.31,  $p = 0.009$ ) and living  
11 environment (Joint test: 13.44,  $p = 0.003$ ) and for chewing by wealth (Joint Test:  
12 15.63,  $p = 0.003$ ), representing robust change over time. Chi-square values for random  
13 parameters are significant both at state (Smoking  $\chi^2$ : 12.82,  $p = 0.0003$  and Chewing  
14  $\chi^2$ : 12.89,  $p = 0.0003$ ) and local area (Smoking  $\chi^2$ : 650.41,  $p < 0.0001$  and Chewing  
15  $\chi^2$ : 801.4,  $p < 0.0001$ ) level showing variation at both levels.  
16  
17  
18

19  
20 Among women, controlling for education, caste and living environment and compared to  
21 those in the first (richest) quintile, the odds ratio of smoking in second quintile: 1.48  
22 (95% CI: 1.28, 1.71), middle quintile: 1.9 (95% CI: 1.64, 2.2), fourth quintile: 2.75 (95%  
23 CI: 2.37, 3.19) and fifth (poorest) quintile: 3.95 (95% CI: 3.39, 4.6). Controlling for  
24 wealth, caste and living environment and compared to those with postgraduate education,  
25 odds ratio of chewing among women with college education: 1.84 (95% CI: 1.55, 2.19),  
26 high school education: 2.19 (95% CI: 1.86, 2.57), primary schooling: 2.87 (95% CI:  
27 2.44, 3.4) and no education: 3.85 (95% CI: 3.27, 4.53). Significant odds ratios for  
28 interaction terms are seen for smoking by wealth (Joint test: 19.128,  $p < 0.0001$ ) and for  
29 chewing by wealth (Joint Test: 31.96,  $p < 0.0001$ ), education (Joint test: 17.42,  $p < 0.0001$ )  
30 and living environment (Joint test: 157.008,  $p < 0.0001$ ). Chi-square values for random  
31 parameters are significant for both state (Smoking  $\chi^2$ : 12.91,  $p = 0.0004$  and Chewing  
32  $\chi^2$ : 12.94,  $p = 0.011$ ) and local area (Smoking  $\chi^2$ : 264,  $p < 0.0001$  and Chewing  $\chi^2$ :  
33 839,  $p < 0.0001$ ), showing variation at both levels. Figure 3 presents adjusted probability  
34 estimates for smoking and chewing among men and women by wealth and education  
35 from multilevel models, which show findings similar to prevalence estimates. ~~women in~~  
36 ~~most social groups showed a declining trend for smoking and only scheduled caste~~  
37 ~~women and those with college education showed small increases in smoking and~~  
38 ~~chewing. All prevalence estimates were age standardized. Adjusted probability estimates~~  
39 ~~for smoking and chewing were calculated from multi-level models (figure 3) and~~  
40 ~~probability trends are seen to resonate with prevalence estimates. Tests for trend over~~  
41 ~~time for smoking among men are significant for wealth, education and residence, while~~  
42 ~~for chewing are significant for wealth only (web table 1). Tests for trend over time for~~  
43  
44  
45  
46  
47  
48  
49  
50  
51  
52  
53  
54  
55  
56  
57  
58  
59  
60

smoking among women are significant for wealth and residence, while for chewing significant trend is seen for wealth, education and residence (web table 2). Random effects estimates are seen to be significant at both local area and state level, with higher variation at local area level.

## DISCUSSION

In 1994, Lopez et al.[109] proposed the *four-stage Cigarette Epidemic Model* that discussed the transitions in of smoking prevalence, consumption amount and mortality in developed countries. As per the model in four stages. In stage I, male smoking prevalence is comparatively low (<15%) and rising (<20%) and female smoking prevalence does not exceed 5% due to sociocultural factors does not exceed 5%. In stage II, tobacco male prevalence among men starts to rise rapidly and peaks around to 50-80% with and female smoking increases at a lagged pace behind men. In stage III, prevalence rates for of smoking among men start to fall, with both male and female smoking converging. Increases are seen for smoking rates among and women stabilizes at 40% and 35% respectively, and younger compared to older populations, are seen to smoke more than older populations. In stage IV, prevalence of smoking begins to gradually declines for among both men and women. M, but the effects of previous stages are seen in high mortality attributable to smoking rises to about one-third for all men, with much lower mortality rates seen among women. This model was developed based on empirical data from developed countries and has not been tested in developing countries. However, in 2011, Thun et al.[110] proposed a modifications to this model potentially relevant for developing countries and were the first to note that smoking patterns by gender in developing countries where smoking patterns among men and women distinctly differ from patterns noted in developed countries. India shows a high and

Formatted: Font: Italic

1  
2  
3  
4  
5  
6  
7  
8 complex burden of tobacco consumption, as also reported in tobacco surveillance  
9 studies[2,12-13]. This paper uses empirical evidence to show that

10 ~~Our results show that~~ India is currently somewhere between stages II and III of the  
11 Cigarette Epidemic model on the basis of estimates of smoking for men, for the smoking  
12 ~~rates seen for men,~~ but distinctly differs from the model on the patterns in the prevalence  
13 ~~rates seen for women.~~

14  
15  
16  
17  
18 We note several distinctions in the Indian scenario from the propositions of this model.  
19 Overall, several dissimilarities are noted in the Indian experience from this model. *First,*  
20 India's unique tobacco experience comprises a 'double burden of ~~the burden of tobacco~~  
21 consumption in India follows two separate trajectories for smoked *and* chewed tobacco  
22 consumption. Patterns for smoking and chewing seem to follow trajectories that differ by  
23 education, living environment and wealth. Further, within smoking, differences  
24 potentially exist by SES in the consumption of cigarettes from *bidis*, which most data are  
25 unable to distinguish. The quantity and quality of these products may differentially  
26 determine the mortality burden attributable to tobacco use in India[14-16]. Assessment of  
27 the disease, mortality and cost burden of the tobacco epidemic needs to account for this  
28 complexity[14-15]. ~~ing and chewing~~

29  
30  
31  
32  
33  
34  
35  
36 ~~, and even within smoking, differences may be seen in the consumption of cigarettes and~~  
37 ~~*bidis* that are combined in most analyses. *Second,* a unique socioeconomic and~~  
38 ~~sociocultural dynamics play profound roles in impacting tobacco use in India.~~  
39 ~~Differences in tobacco consumption are seen by major SES markers such as spatial~~  
40 ~~gradient (not reported in the model) is seen in India by the diverse axes — wealth,~~  
41 ~~education, living environment and caste. Findings from this analysis indicate a dichotomy~~  
42 ~~between ~~— and prevalence results indicates a dichotomy in the understanding of this~~~~  
43 ~~gradient. We find higher **absolute** prevalence ~~by rates among socioeconomically~~  
44 ~~disadvantaged groups (lower caste, wealth and education levels); but **higher relative**~~  
45 ~~change in prevalence over time percentage increases among the socioeconomically~~  
46 ~~advantaged groups (by higher caste, wealth and education levels). *No previous other*~~  
47 ~~study has reported this finding **for India**. Urbanization seems to be playing an increasing~~~~

Formatted: Font: Bold, Italic

Formatted: Font: Bold

Formatted: Font: Bold

Formatted: Font: Bold, Italic

Formatted: Font: Bold, Italic

1  
2  
3  
4  
5  
6  
7  
8 role in impacting tobacco use for men and women. We also recommend that  
9 analyses by type and amount of tobacco consumed are needed to systematically  
10 understand these patterns.

11  
12  
13  
14 be examined systematically to understand the direction of these trends. **Third, social**  
15 gradients in tobacco use (overall and by type of tobacco) in India distinctly differ by  
16 gender. Despite women's empowerment in India, large-scale increases in women's  
17 smoking as predicted by the Cigarette Epidemic Model are yet to be seen in India  
18 [10-11, 17-18], as seen in the developed countries  
19 [11]. Aggregate estimates show that women  
20 are far behind men in prevalence rates for smoking; and smoking and chewing rates  
21 among women, barring a few groups, seem to be declining. Aggregate estimates  
22 show that women are far behind men in prevalence rates for smoking; and smoking and  
23 chewing rates among women, barring a few groups, seem to be declining. The reasons for  
24 this could be several. First, that Indian sociocultural realities and lower acceptability of  
25 smoking among women leads to delays in age of initiation of smoking and higher rates  
26 among older compared to younger women (Web Table 1). Women's smoking has been  
27 linked to their empowerment, but this may be confined to urban areas and it is possible  
28 that on average, smoking continues to remain a social taboo among women.  
29 Representation of smoking in the media may also explain the gender patterns in the use  
30 of tobacco; smoking has been projected as an expression of masculinity among men and  
31 has moralistic connotations for women  
32 [19-21]. Second, an economic perspective  
33 explaining the lower smoking rates among women in India may attribute this statistic to  
34 women's unequal participation in the labor market and limited access to personal  
35 disposable income. Higher smoking among women in cities may partly indicate greater  
36 uptake of smoking by employed women. Third, given that data for this analysis comes  
37 from a reproductive health survey, it is possible that results for women are an  
38 underestimate. Web table 1 indicates that older (above 35 years of age) women are more  
39 likely use tobacco. However, patterns in this analysis match findings from other tobacco  
40 studies such as the GATS in India (IIPS)  
41 [5-6], providing a counter to this argument.  
42  
43  
44  
45  
46  
47  
48  
49  
50  
51  
52  
53  
54  
55  
56  
57  
58  
59  
60

1  
2  
3  
4  
5  
6  
7  
8 *Finally*, evidence on the socioeconomic gradient in tobacco use in India needs to be  
9 linked to its implications for tobacco-related mortality and morbidity[14-15]. Dikshit et  
10 al.[15] provide the first estimates of cancer mortality in India, attributing a major  
11 component of age-standardized cancer mortality from lung and oral cancers to high rates  
12 of tobacco use in India. Analyses stratifying cancer morbidity and mortality in India by  
13 SES have not yet been attempted, and the lack of reliable surveillance data for chronic  
14 diseases prevents an exhaustive assessment of the impact of tobacco use on Indian  
15 current and future chronic disease burden[22].  
16 a missing component in understanding the burden of tobacco in India needs to come from  
17 cause specific or cancer mortality studies[12]. Currently, only ecological analyses of  
18 these are possible due to lack of surveillance data in India[13], and hence a systematic  
19 examination of mortality attributable to tobacco consumption will assist in understanding  
20 where India is vis-a-vis this model.  
21  
22  
23  
24  
25  
26  
27

28  
29 This study ~~provides~~ ~~ais~~ ~~the~~ ~~first~~ systematic examination of ~~the~~ ~~trends~~ ~~in~~ socioeconomic  
30 ~~patterns~~ ~~in~~ ~~distributions~~ ~~of~~ ~~tobacco~~ ~~use~~ ~~in~~ ~~India~~ ~~over~~ ~~time~~ ~~consumption~~ ~~in~~ ~~India~~. Data ~~in~~  
31 ~~this~~ ~~from~~ ~~this~~ analysis comes from the NFHS, which is a large, ~~is~~ representative and  
32 generalizable survey, providing a comparative picture of tobacco patterns over time. ~~T~~  
33 ~~to~~ the Indian population. However, the limitations of this analysis are the following. First,  
34 ~~study~~ ~~include~~ ~~that~~ data is cross-sectional, hence limiting scope for causal inference.  
35 ~~NFHS~~ ~~does~~ ~~not~~ ~~provide~~ ~~detailed~~ ~~data~~ ~~by~~ ~~and~~ ~~categories~~ ~~type~~ ~~or~~ ~~volume~~ of tobacco.  
36 ~~Finally~~, NFHS is a reproductive health survey where women in the ages of 15-49 years  
37 are sampled. Men are sampled in the households of the female sample. This introduces  
38 the potential for two downward biases. The first pertains to *social desirability bias*  
39 particularly related to underestimation of smoking patterns in women's childbearing  
40 years. Second, since the sample of men is conditional on the households from which  
41 women were sampled, the pool of men sampled may not be representative. ~~consumed~~ ~~are~~  
42 ~~not~~ ~~available~~ ~~for~~ NFHS-2. Despite these ~~caveats~~, NFHS (and in general the demographic  
43 and health surveys) has proven to be representative and generalizable and continues to be  
44 used in a number of studies related to tobacco and other health outcomes[5-6]. In  
45 addition, our findings are consistent with estimates from studies using other surveys  
46  
47  
48  
49  
50  
51  
52  
53  
54  
55  
56  
57  
58  
59  
60

1  
2  
3  
4  
5  
6  
7  
8 assessing the burden of tobacco and its drivers in India[2,23]. Tobacco burden in the  
9 'productive' populations (14-50 years) not only represents the current burden of tobacco  
10 but may predict future morbidity.  
11

12  
13  
14 We present empirical evidence we believe that India is experiencing a unique economic  
15 and social transition in tobacco consumption, quite distinct from the experience of  
16 developed countries that is likely to manifest in a number of morbidities[2,14-15]. ~~that is~~  
17 ~~likely to manifest in a number of health inequalities including tobacco consumption.~~ In  
18 order to ensure policy effectiveness to prevent and reduce the exposure to tobacco, over  
19 ~~time,~~ there is a need to systematically monitor and examine the social inequities in  
20 tobacco ~~consumption-use~~ over time and channel interventions to the social groups that are  
21 most vulnerable to these inequalities.  
22  
23  
24  
25  
26  
27  
28  
29  
30  
31  
32  
33  
34  
35  
36  
37  
38  
39  
40  
41  
42  
43  
44  
45  
46  
47  
48  
49  
50  
51  
52  
53  
54



1  
2  
3  
4  
5  
6  
7  
8  
9  
10  
11  
12  
13  
14  
15  
16  
17  
18  
19  
20  
21  
22  
23  
24  
25  
26  
27  
28  
29  
30  
31  
32  
33  
34  
35  
36  
37  
38  
39  
40  
41  
42  
43  
44  
45  
46  
47  
48  
49  
50  
51  
52  
53  
54  
55  
56  
57  
58  
59  
60

For peer review only

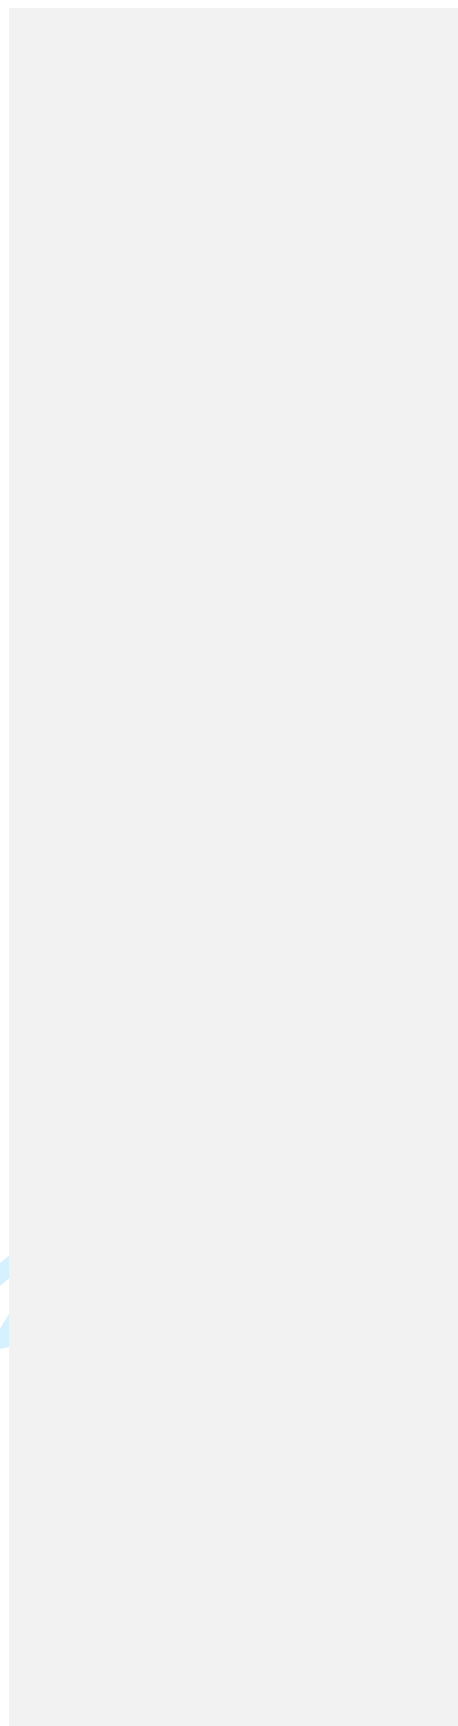

**Table 1: Frequency and prevalence (%) of tobacco smoking, chewing and dual use (smoking and chewing) by wealth, education and caste/tribe status among men and women in the National Family Health Surveys 1998-99 and 2005-6**

|                                       | Sample Population        |                          | MEN                  |                       |     |                       |                      |     | FEMALE               |                      |                    |                      |        |                      |                       |        |                      |                       |        |     |
|---------------------------------------|--------------------------|--------------------------|----------------------|-----------------------|-----|-----------------------|----------------------|-----|----------------------|----------------------|--------------------|----------------------|--------|----------------------|-----------------------|--------|----------------------|-----------------------|--------|-----|
|                                       |                          |                          | SMOKE                |                       |     | CHEW                  |                      |     | DUAL                 |                      |                    | SMOKE                |        |                      | CHEW                  |        |                      | DUAL                  |        |     |
|                                       | 1998-9                   | 2005-6                   | 1998-9               | 2005-6                | % Δ | 1998-9                | 2005-6               | % Δ | 1998-9               | 2005-6               | % Δ                | 1998-9               | 2005-6 | % Δ                  | 1998-9                | 2005-6 | % Δ                  | 1998-9                | 2005-6 | % Δ |
| <b>Caste/tribe status<sup>†</sup></b> |                          |                          |                      |                       |     |                       |                      |     |                      |                      |                    |                      |        |                      |                       |        |                      |                       |        |     |
| General                               | (M) 50,939<br>(F) 50,526 | (M) 21,850<br>(F) 41,844 | 22.2<br>(21.4, 22.9) | 28.8<br>(27.7, 29.9)  | 30  | 22.2<br>(21.4, 23.02) | 33.2<br>(31.8, 34.5) | 50  | 7.4<br>(6.9, 7.8)    | 10.8<br>(10.0, 11.5) | 1.0<br>(0.9, 1.1)  | 0.8<br>(0.55, 1.0)   | -20    | 6.6 (6.1, 7.1)       | 7.24<br>(6.6, 7.85)   | 10     | 0.24<br>(0.17, 0.3)  | 0.2<br>(0.11, 0.27)   |        |     |
| SC                                    | (M) 21,491<br>(F) 21,045 | (M) 11,953<br>(F) 20,566 | 31.5<br>(30.5, 32.5) | 39.3<br>(37.8, 40.9)  | 25  | 27.8<br>(26.6, 29.1)  | 40.5<br>(38.8, 42.1) | 46  | 12.1<br>(11.4, 12.8) | 15.8<br>(14.7, 16.9) | 2.3<br>(1.9, 2.8)  | 2.4<br>(2.05, 2.8)   | 4      | 10.9<br>(10.1, 11.8) | 12.1<br>(11.2, 12.9)  | 11     | 0.5<br>(0.4, 0.7)    | 0.4<br>(0.3, 0.6)     |        |     |
| ST                                    | (M) 16,187<br>(F) 16,520 | (M) 8,453<br>(F) 16,518  | 30.6<br>(28.8, 32.3) | 36.6<br>(34.1, 39.1)  | 20  | 38.6<br>(36.9, 40.4)  | 52.6<br>(49.9, 55.3) | 36  | 14.5<br>(13.3, 15.6) | 18.6<br>(16.7, 20.4) | 3.0<br>(2.5, 3.6)  | 2.7<br>(2.04, 3.4)   | -10    | 18.5<br>(17.0, 20.1) | 25.08<br>(22.8, 27.4) | 36     | 1.0<br>(0.7, 1.2)    | 0.9<br>(0.6, 1.3)     |        |     |
| OBC                                   | (M) 36,381<br>(F) 36,290 | (M) 25,144<br>(F) 29,561 | 24.7<br>(23.9, 25.5) | 31.2<br>(30.2, 32.2)  | 26  | 25.4<br>(24.5, 26.3)  | 36.2<br>(35.0, 37.5) | 43  | 9.9<br>(9.4, 10.5)   | 13.1<br>(12.3, 13.8) | 1.5<br>(1.3, 1.7)  | 1.4<br>(1.2, 1.7)    | -7     | 7.3<br>(6.8, 7.7)    | 7.08<br>(6.6, 7.6)    | -3     | 0.3<br>(0.26, 0.4)   | 0.14<br>(0.09, 0.21)  |        |     |
| No caste                              | (M) 6,466<br>(F) 6,505   | (M) 2,355<br>(F) 5,653   | 31.8<br>(29.4, 34.3) | 37.9<br>(34.2, 41.6)  | 19  | 23.3<br>(20.9, 25.6)  | 35.5<br>(31.6, 39.3) | 52  | 10.7<br>(9.3, 12.1)  | 13.0<br>(10.9, 15.2) | 1.4<br>(0.8, 1.9)  | 0.9<br>(0.36, 1.48)  | -36    | 10.3<br>(9.1, 11.6)  | 12.8<br>(10.8, 14.8)  | 24     | 0.4<br>(0.2, 0.6)    | 0.31<br>(0.03, 0.59)  |        |     |
| <b>Education Level<sup>‡</sup></b>    |                          |                          |                      |                       |     |                       |                      |     |                      |                      |                    |                      |        |                      |                       |        |                      |                       |        |     |
| Post graduate                         | (M) 3,432<br>(F) 1,963   | (M) 2,920<br>(F) 3,526   | 7.6<br>(6.5, 8.7)    | 15.05<br>(13.0, 17.1) | 98  | 12.4<br>(10.8, 14.1)  | 18.5<br>(16.0, 21.1) | 49  | 1.7<br>(1.2, 2.2)    | 4.04<br>(3.0, 5.1)   | 0.2 (-0.2, 0.6)    | 0.02 (-0.007, 0.05)  | -90    | 1.2<br>(0.45, 1.9)   | 0.33<br>(0.14, 0.5)   | -73    | 0.2 (-0.17, 0.5)     | 0.004 (-0.002, 0.012) |        |     |
| College                               | (M) 11,340<br>(F) 6,586  | (M) 7,811<br>(F) 9,424   | 11.1<br>(10.2, 11.9) | 20.7<br>(19.2, 22.1)  | 86  | 14.9<br>(13.9, 15.8)  | 23.9<br>(22.3, 25.6) | 60  | 3.5<br>(3.1, 3.9)    | 6.7<br>(5.8, 7.6)    | 0.1 (-0.01, 0.2)   | 0.11<br>(0.03, 0.19) | 10     | 1.3<br>(0.9, 1.6)    | 1.8<br>(1.4, 2.2)     | 39     | 0.05 (-0.04, 0.14)   | 0.04 (-0.017, 0.1)    |        |     |
| High school                           | (M) 69,996<br>(F) 46,629 | (M) 26,100<br>(F) 34,338 | 21.2<br>(20.7, 21.8) | 24.7<br>(23.8, 25.5)  | 17  | 23.3<br>(22.7, 23.9)  | 33.1<br>(32.0, 34.1) | 42  | 7.8<br>(7.5, 8.2)    | 9.9<br>(9.3, 10.6)   | 0.2<br>(0.17, 0.3) | 0.07<br>(0.04, 0.1)  | -65    | 4.2 (3.9, 4.6)       | 3.4<br>(3.04, 3.7)    | -19    | 0.1<br>(0.06, 0.13)  | 0.04 (0.02, 0.06)     |        |     |
| Primary school                        | (M) 21,730<br>(F) 20,604 | (M) 12,622<br>(F) 19,451 | 32.7<br>(31.7, 33.6) | 35.6<br>(34.3, 36.9)  | 1   | 30.2<br>(29.2, 31.2)  | 41.9<br>(40.5, 43.4) | 39  | 12.1<br>(11.4, 12.7) | 14.8<br>(13.8, 15.7) | 0.7<br>(0.5, 0.8)  | 0.2<br>(0.13, 0.3)   | -71    | 9.0<br>(8.4, 9.6)    | 7.4<br>(6.8, 8.02)    | -18    | 0.18<br>(0.13, 0.24) | 0.07<br>(0.03, 0.11)  |        |     |

Formatted: Left: 1", Right: 1", Top: 1.25", Bottom: 1.25", Width: 11", Height: 8.5"

Formatted: Superscript, Kern at 8 pt

Formatted: Superscript, Kern at 8 pt

1  
2  
3  
4  
5  
6  
7  
8  
9  
10  
11  
12  
13  
14  
15  
16  
17  
18  
19  
20  
21  
22  
23  
24  
25  
26  
27  
28  
29  
30  
31  
32  
33  
34  
35  
36  
37  
38  
39  
40  
41  
42  
43  
44  
45  
46  
47  
48  
49

|                         |                                  |                                 |                          |                         |    |                         |                              |    |                          |                             |                         |                         |     |                          |                          |     |                         |                           |
|-------------------------|----------------------------------|---------------------------------|--------------------------|-------------------------|----|-------------------------|------------------------------|----|--------------------------|-----------------------------|-------------------------|-------------------------|-----|--------------------------|--------------------------|-----|-------------------------|---------------------------|
| <i>Illiterate</i>       | (M) 24,966<br>(F) 55,104         | (M) 20,302<br>(F) 57,403        | 38.9<br>(37.9,,<br>39.9) | 43.9<br>(42.8,<br>45.2) | 13 | 34.4<br>(33.2,35<br>.5) | 47.1<br>(45.7,<br>48.5)      | 37 | (15.9<br>(15.1,<br>16.6) | 18.9<br>(17.<br>9,19<br>.9) | 2.6<br>(2.4,,2.<br>9)   | 2.3<br>(2.02,2<br>.6)   | -12 | 11.9<br>(11.4,<br>12.6)  | 13.3<br>(12.6,<br>13.0)  | 12  | 0.6<br>(0.53,0<br>.72)  | 0.42<br>(0.33,0<br>.51)   |
| <b>Wealth Quintiles</b> |                                  |                                 |                          |                         |    |                         |                              |    |                          |                             |                         |                         |     |                          |                          |     |                         |                           |
| <i>Richest</i>          | (M) 26,291<br>(F) 26,177         | (M) 13,706<br>(F) 24,837        | 11.9<br>(11.2,<br>12.5)  | 19.9<br>(18.8,<br>21.1) | 63 | 13.7<br>(12.8,14<br>.6) | 20.4<br>(19.0,<br>21.8)      | 49 | 3.3<br>(2.97,<br>3.6)    | 5.8<br>(5.1,<br>6.4)        | 0.2<br>(0.1,0.<br>3)    | 0.14<br>(0.08,0<br>.2)  | -30 | 2.2<br>(1.9,2.5<br>)     | 2.02<br>(1.7,2.<br>3)    | -8  | 0.05<br>(0.01,0<br>.07) | 0.042<br>(0.009,<br>0.07) |
| <i>Richer</i>           | (M) 26,293<br>(F) 26,177         | (M) 13,946<br>(F) 24,837        | 19.3<br>(18.5,<br>20.04) | 25.8<br>(24.6,<br>27.1) | 37 | 19.0<br>(18.1,19<br>.9) | 30.2<br>(28.7,<br>31.7)      | 59 | 5.6<br>(5.2,6<br>.02)    | 9.3<br>(8.4,<br>10.2<br>)   | 0.46<br>(0.37,0<br>.54) | 0.37<br>(0.27,0<br>.47) | -20 | 5.4<br>(4.9,5.9<br>)     | 4.9<br>(4.4,5.<br>4)     | -9  | 0.1<br>(0.07,0<br>.18)  | 0.06<br>(0.02,0<br>.09)   |
| <i>Middle</i>           | (M) 26,294<br>(F) 26,174         | (M) 14,075<br>(F) 24,826        | 25.6<br>(24.7,2<br>6.4)  | 31.4<br>(30.1,<br>32.7) | 25 | 22.9<br>(22.0,23<br>.9) | 34.9<br>(33.4,<br>36.3)      | 52 | 7.6<br>(7.2,8<br>.1)     | 11.5<br>(10.<br>6,12<br>.3) | 1.1<br>(0.9,1.<br>3)    | 0.7<br>(0.6,0.<br>9)    | -36 | 7.8<br>(7.2,8.3<br>)     | 6.9<br>(6.4,7.<br>4)     | -11 | 0.23<br>(0.16,0<br>.3)  | 0.07<br>(0.04,0<br>.11)   |
| <i>Poorer</i>           | (M) 26,293<br>(F) 26,179         | (M) 14,007<br>(F) 24,814        | 30.6<br>(29.7,3<br>1.5)  | 36.5<br>(35.2,<br>37.8) | 21 | 28.9<br>(28.0,29<br>.9) | 39.5<br>(38.0<br>3,40.<br>9) | 37 | 11.6<br>(10.9,<br>12.2)  | 14.5<br>(13.<br>6,15<br>.5) | 1.7<br>(1.5,1.<br>9)    | 1.7<br>(1.4,1.<br>9)    | 0   | 10.9,<br>(10.3,11<br>.6) | 10.5<br>(9.8,12<br>.2)   | -4  | 0.4<br>(0.3,0.<br>5)    | 0.24<br>(0.17,0<br>.31)   |
| <i>Poorest</i>          | (M) 26,293<br>(F) 26,179         | (M) 14,021<br>(F) 24,828        | 35.5<br>(34.4,,<br>36.5) | 40.6,<br>39.3,<br>41.9) | 13 | 36.8<br>(35.7,37<br>.9) | 49.7<br>(48.2,<br>51.2)      | 35 | 16.7<br>(15.9,<br>17.5)  | 19.4<br>(18.<br>4,20<br>.5) | 3.5<br>(3.1,3.<br>9)    | 3.2<br>(2.8,3.<br>7)    | -9  | 14.1<br>(13.3,15<br>.0)  | 17.1<br>(16.03,<br>18.1) | 21  | 0.9<br>(0.7,1.<br>0)    | 0.7<br>(0.52,0<br>.86)    |
| <i>Total</i>            | (M)<br>131,464<br>(F)<br>130,886 | (M)<br>69,755<br>(F)<br>124,142 |                          |                         |    |                         |                              |    |                          |                             |                         |                         |     |                          |                          |     |                         |                           |

<sup>1</sup>Large city: urban population ≥1 million; Small city: 100000-1 million; Town: ≤100000 million  
<sup>12</sup>Scheduled castes and scheduled tribes are identified by the Government of India as socially and economically backward and needing protection from social injustice and exploitation. Other backward class is a diverse collection of intermediate castes that were considered low in the traditional caste hierarchy but are clearly above scheduled castes. General is thus a default residual group that enjoys higher status in the caste hierarchy.  
<sup>3</sup>Others include Sikh, Buddhist, Jain, Jewish, Zoroastrian and Others  
<sup>24</sup> Post graduate: 15 or more years of education; college: 13-15 years of education; high school: 8-12 years of education; secondary: 5-8 years of education; primary: 0-5 years of education; illiterate: 0 years of education  
 \*Percentage change (% Δ) numbers have been rounded to the nearest integer.  
 \*All results for prevalence are survey adjusted and age-standardised. Prevalence results are all in percentages.

**Web Tables:**

**Table 24: Pooled Regression Models showing Odds Ratios (95% CIs) for Smoking and Chewing among men and interactions for wealth, education, residence and caste over time.**

| Covariates                             | Smoking             |                                  |                                     |                                              |                                 | Chewing             |                                  |                                     |                                              |                                 |
|----------------------------------------|---------------------|----------------------------------|-------------------------------------|----------------------------------------------|---------------------------------|---------------------|----------------------------------|-------------------------------------|----------------------------------------------|---------------------------------|
|                                        | Model 1: Full Model | Model 2: Interaction with Wealth | Model 3: Interaction with Education | Model 4: Interaction with Living Environment | Model 5: Interaction with Caste | Model 1: Full Model | Model 2: Interaction with Wealth | Model 3: Interaction with Education | Model 4: Interaction with Living Environment | Model 5: Interaction with Caste |
| <b>Wealth Quintiles (Richest)</b>      | 1.00                | 1.00                             | 1.00                                | 1.00                                         | 1.00                            | 1.00                | 1.00                             | 1.00                                | 1.00                                         | 1.00                            |
| Richer                                 | 1.37<br>(1.32,1.43) | 1.51<br>(1.44,1.59)              | 1.37<br>(1.31,1.42)                 | 1.36<br>(1.3,1.41)                           | 1.37<br>(1.31,1.42)             | 1.43<br>(1.38,1.48) | 1.33<br>(1.27,1.4)               | 1.42<br>(1.36,1.47)                 | 1.42<br>(1.36,1.47)                          | 1.41<br>(1.36,1.47)             |
| Middle                                 | 1.71<br>(1.64,1.78) | 1.99<br>(1.89,2.1)               | 1.71<br>(1.64,1.78)                 | 1.68<br>(1.61,1.75)                          | 1.7<br>(1.63,1.77)              | 1.75<br>(1.68,1.82) | 1.63<br>(1.55,1.72)              | 1.73<br>(1.66,1.8)                  | 1.72<br>(1.65,1.8)                           | 1.72<br>(1.65,1.79)             |
| Poorer                                 | 2.06<br>(1.97,2.16) | 2.51<br>(2.37,2.65)              | 2.05<br>(1.96,2.14)                 | 2.02<br>(1.93,2.11)                          | 2.04<br>(1.95,2.14)             | 1.92<br>(1.84,2.01) | 1.77<br>(1.67,1.87)              | 1.89<br>(1.8,1.97)                  | 1.86<br>(1.78,1.95)                          | 1.87<br>(1.79,1.96)             |
| Poorest                                | 2.33<br>(2.22,2.46) | 2.88<br>(2.72,3.06)              | 2.31<br>(2.19,2.43)                 | 2.29<br>(2.18,2.41)                          | 2.3<br>(2.19,2.42)              | 2.1<br>(1.99,2.2)   | 1.93<br>(1.82,2.05)              | 2.03<br>(1.92,2.13)                 | 2.03<br>(1.932.13)                           | 2.02<br>(1.93,2.12)             |
| <b>Education (Post graduate)</b>       | 1.00                | 1.00                             | 1.00                                | 1.00                                         | 1.00                            | 1.00                | 1.00                             | 1.00                                | 1.00                                         | 1.00                            |
| College                                | 1.38<br>(1.28,1.49) | 1.41<br>(1.31,1.53)              | 1.34<br>(1.19,1.5)                  | 1.4 (1.29,1.51)                              | 1.4<br>(1.3,1.51)               | 1.26<br>(1.17,1.36) | 1.28<br>(1.19,1.39)              | 1.14<br>(1.02,1.27)                 | 1.29<br>(1.19,1.39)                          | 1.29<br>(1.2,1.39)              |
| High School                            | 1.81<br>(1.69,1.95) | 1.91<br>(1.78,2.05)              | 2.16<br>(1.95,2.4)                  | 1.87<br>(1.74,2.01)                          | 1.87<br>(1.74,2.01)             | 1.53<br>(1.43,1.65) | 1.64<br>(1.53,1.76)              | 1.46<br>(1.33,1.61)                 | 1.65<br>(1.54,1.77)                          | 1.66<br>(1.54,1.78)             |
| Primary                                | 2.73<br>(2.54,2.94) | 2.81<br>(2.61,3.04)              | 3.4<br>(3.05,3.78)                  | 2.77<br>(2.57,2.99)                          | 2.77<br>(2.57,2.99)             | 1.98<br>(1.84,2.13) | 2.04<br>(1.9,2.2)                | 1.84<br>(1.66,2.04)                 | 2.05<br>(1.9,2.21)                           | 2.06<br>(1.91,2.21)             |
| No education                           | 3.18<br>(2.96,3.43) | 3.27<br>(3.03,3.53)              | 4.07<br>(3.66,4.53)                 | 3.19<br>(2.96,4.34)                          | 3.18<br>(2.95,3.42)             | 2.09<br>(1.94,2.26) | 2.06<br>(1.91,2.22)              | 1.93<br>(1.74,2.14)                 | 2.07<br>(1.92,2.23)                          | 2.08<br>(1.93,2.24)             |
| <b>Living Environment (Large city)</b> | 1.00                | 1.00                             | 1.00                                | 1.00                                         | 1.00                            | 1.00                | 1.00                             | 1.00                                | 1.00                                         | 1.00                            |
| Small City                             | 0.77                | 0.81                             | 0.8                                 | 0.82 (0.75,0.9)                              | 0.79                            | 0.96                | 1.02                             | 1.02                                | 1.06                                         | 1.03                            |

1  
2  
3  
4  
5  
6  
7  
8  
9  
10  
11  
12  
13  
14  
15  
16  
17  
18  
19  
20  
21  
22  
23  
24  
25  
26  
27  
28  
29  
30  
31  
32  
33  
34  
35  
36  
37  
38  
39  
40  
41  
42  
43  
44  
45  
46  
47  
48  
49

|                            |                     |                     |                     |                     |                     |                     |                     |                      |                      |                     |
|----------------------------|---------------------|---------------------|---------------------|---------------------|---------------------|---------------------|---------------------|----------------------|----------------------|---------------------|
|                            | (0.72,0.82)         | (0.76,0.87)         | (0.74,0.85)         |                     | (0.74,0.84)         | (0.89,1.02)         | (0.96,1.09)         | (0.96,1.09)          | (0.97,1.16)          | (0.97,1.1)          |
| Town                       | 0.78<br>(0.74,0.82) | 0.83(0.79,0.88)     | 0.81(0.77,0.85)     | 0.88<br>(0.82,0.95) | 0.81<br>(0.77,0.85) | 0.92<br>(0.87,0.97) | 1.01<br>(0.95,1.06) | 1.01<br>(0.95,1.06)  | 1.06<br>(0.98,1.15)  | 1.01<br>(0.96,1.07) |
| Village                    | 0.68<br>(0.65,0.71) | 0.75<br>(0.71,0.78) | 0.73<br>(0.7,0.77)  | 0.87<br>(0.82,0.92) | 0.73<br>(0.7,0.76)  | 0.76<br>(0.73,0.79) | 0.92<br>(0.88,0.96) | 0.92<br>(0.88,0.96)  | 0.93<br>(0.88,0.99)  | 0.93<br>(0.88,0.97) |
| <b>Caste/Tribe (Other)</b> | 1.00                | 1.00                | 1.00                | 1.00                | 1.00                | 1.00                | 1.00                | 1.00                 | 1.00                 | 1.00                |
| SC                         | 1.16<br>(1.12,1.2)  | 1.15<br>(1.11,1.19) | 1.15<br>(1.11,1.18) | 1.15<br>(1.11,1.19) | 1.16<br>(1.11,1.21) | 1.12<br>(1.08,1.15) | 1.1<br>(1.06,1.13)  | 1.1<br>(1.06,1.13)   | 1.1<br>(1.06,1.13)   | 1.1<br>(1.06,1.14)  |
| ST                         | 1.14<br>(1.09,1.2)  | 1.13 (1.08, 1.2)    | 1.14<br>(1.08,1.18) | 1.14 (1.09,1.2)     | 1.15<br>(1.09,1.21) | 3.02<br>(2.88,3.15) | 1.1<br>(1.06,1.15)  | 1.1<br>(1.05,1.15)   | 1.1<br>(1.05,1.15)   | 1.17<br>(1.11,1.24) |
| OBC                        | 1.00<br>(0.98,1.04) | 0.99<br>(0.97,1.02) | 0.99<br>(0.96,1.02) | 0.99<br>(0.97,1.02) | 1.03<br>(0.99,1.07) | 1.05<br>(1.02,1.08) | 1.01<br>(0.97,1.03) | 1.002<br>(0.97,1.03) | 1.003<br>(0.97,1.03) | 1.04<br>(0.99,1.07) |
| No Caste or missing        | 1.06<br>(1.01,1.13) | 1.07<br>(1.01,1.13) | 1.07<br>(1.01,1.13) | 1.08<br>(1.02,1.14) | 1.05<br>(0.98,1.13) | 0.97<br>(0.92,1.03) | 1.02<br>(0.96,1.08) | 1.01<br>(0.96,1.08)  | 1.02<br>(0.96,1.08)  | 0.97<br>(0.9,1.04)  |
| <b>Survey Year (Yr)</b>    |                     | 1.74<br>(1.7,1.88)  | 1.67<br>(1.46,1.91) | 1.49 (1.4,1.58)     | 1.24<br>(1.19,1.3)  |                     | 1.47<br>(1.38,1.56) | 1.34<br>(1.17,1.54)  | 1.69<br>(1.58,1.8)   | 1.72<br>(1.65,1.79) |
| Yr *Richer                 |                     | 0.78<br>(0.73,0.84) |                     |                     |                     |                     | 1.15<br>(1.07,1.24) |                      |                      |                     |
| Yr*Middle                  |                     | 0.68<br>(0.63,0.73) |                     |                     |                     |                     | 1.13<br>(1.05,1.22) |                      |                      |                     |
| Yr *Poorer                 |                     | 0.60<br>(0.56,0.65) |                     |                     |                     |                     | 1.15<br>(1.07,1.24) |                      |                      |                     |
| Yr *Poorest                |                     | 0.58<br>(0.53,0.62) |                     |                     |                     |                     | 1.11 (1.03, 1.2)    |                      |                      |                     |
| Yr *College                |                     |                     | 1.13<br>(0.97,1.32) |                     |                     |                     |                     | 1.27<br>(1.1,1.48)   |                      |                     |
| Yr * High School           |                     |                     | 0.78<br>(0.68,0.89) |                     |                     |                     |                     | 1.28<br>(1.11,1.47)  |                      |                     |
| Yr * Primary               |                     |                     | 0.66<br>(0.57,0.77) |                     |                     |                     |                     | 1.02<br>(0.88,,1.18) |                      |                     |
| Yr * No education          |                     |                     | 0.61<br>(0.53,0.70) |                     |                     |                     |                     | 1.01<br>(0.87,1.17)  |                      |                     |
| Yr *Small City             |                     |                     |                     | 0.99<br>(0.87,1.12) |                     |                     |                     |                      | 0.94<br>(0.82,1.06)  |                     |
| Yr * Town                  |                     |                     |                     | 0.89<br>(0.81,0.98) |                     |                     |                     |                      | 0.9<br>(0.82,0.99)   |                     |
| Yr * Village               |                     |                     |                     | 0.73<br>(0.68,0.79) |                     |                     |                     |                      | 0.98<br>(0.91,1.05)  |                     |
| Yr *SC                     |                     |                     |                     |                     | 0.99<br>(0.92,1.05) |                     |                     |                      |                      | 0.99<br>(0.93,1.06) |

|                                              |  |                     |                    |                    |                     |  |                     |                     |                     |                     |
|----------------------------------------------|--|---------------------|--------------------|--------------------|---------------------|--|---------------------|---------------------|---------------------|---------------------|
| Yr *ST                                       |  |                     |                    |                    | 0.97<br>(0.9,1.05)  |  |                     |                     |                     | 0.84<br>(0.78,0.91) |
| Yr*OBC                                       |  |                     |                    |                    | 0.92<br>(0.87,0.97) |  |                     |                     |                     | 0.92<br>(0.87,0.97) |
| Yr*No Caste                                  |  |                     |                    |                    | 1.07<br>(0.94,1.21) |  |                     |                     |                     | 1.15<br>(1.02,1.29) |
| <b>Fixed Part of the Model</b>               |  |                     |                    |                    |                     |  |                     |                     |                     |                     |
| Joint Chi Test for Interaction (p-value)     |  | 174.31<br>(p<0.001) | 13.31<br>(p=0.009) | 13.44<br>(p=0.003) | 0.318<br>(p=0.98)   |  | 15.63<br>(p=0.003)  | 8.52<br>(p=0.074)   | 2.6<br>(p=0.46)     | 1.387<br>(p=0.85)   |
| <b>Random Part of the Model</b>              |  |                     |                    |                    |                     |  |                     |                     |                     |                     |
| Chi square for Level 3: State (p-value)      |  | 12.82<br>(p=0.003)  | 12.82<br>(p=0.003) | 12.82<br>(p=0.003) | 12.82<br>(p=0.003)  |  | 12.89<br>(p=0.0003) | 12.89<br>(p=0.0003) | 12.89<br>(p=0.0003) | 12.89<br>(p=0.0003) |
| Chi square for Level 2: Local Area (p-value) |  | 650.41<br>(p<0.001) | 655.7<br>(p<0.001) | 654.2<br>(p<0.001) | 660.7<br>(p<0.001)  |  | 801.6<br>(p<0.001)  | 802.4<br>(p<0.001)  | 802.4<br>(p<0.001)  | 801.7<br>(p<0.001)  |

\*Models are controlled for age (centered at 29 years), marital status and religion

1  
2  
3  
4  
5  
6  
7  
8  
9  
10  
11  
12  
13  
14  
15  
16  
17  
18  
19  
20  
21  
22  
23  
24  
25  
26  
27  
28  
29  
30  
31  
32  
33  
34  
35  
36  
37  
38  
39  
40  
41  
42  
43  
44  
45  
46  
47  
48  
49

**Table 32: Pooled Regression Models showing Odds Ratios (95% CIs) for Smoking and Chewing among women and interactions for wealth, education, residence and caste over time.**

| Covariates                             | Smoking             |                                  |                                     |                                              |                                 | Chewing             |                                  |                                     |                                              |                                 |
|----------------------------------------|---------------------|----------------------------------|-------------------------------------|----------------------------------------------|---------------------------------|---------------------|----------------------------------|-------------------------------------|----------------------------------------------|---------------------------------|
|                                        | Model 1: Full Model | Model 2: Interaction with Wealth | Model 3: Interaction with Education | Model 4: Interaction with Living Environment | Model 5: Interaction with Caste | Model 1: Full Model | Model 2: Interaction with Wealth | Model 3: Interaction with Education | Model 4: Interaction with Living Environment | Model 5: Interaction with Caste |
| <b>Wealth Quintiles (Richest)</b>      | 1.00                | 1.00                             | 1.00                                | 1.00                                         | 1.00                            | 1.00                | 1.00                             | 1.00                                | 1.00                                         | 1.00                            |
| Richer                                 | 1.48 (1.28,1.71)    | 1.82 (1.49,2.22)                 | 1.48 (1.28,1.71)                    | 1.48 (1.28,1.71)                             | 1.49 (1.29,1.72)                | 1.48 (1.41,1.56)    | 1.41 (1.32,1.51)                 | 1.48 (1.4,1.55)                     | 1.51 (1.43,1.59)                             | 1.48 (1.41,1.56)                |
| Middle                                 | 1.9 (1.64,2.19)     | 2.63 (2.17,3.19)                 | 1.87 (1.62,2.16)                    | 1.88 (1.62,2.18)                             | 1.9 (1.64,2.19)                 | 1.75 (1.66,1.85)    | 1.58 (1.47,1.7)                  | 1.75 (1.65,1.84)                    | 1.81 (1.72,1.92)                             | 1.76 (1.66,1.85)                |
| Poorer                                 | 2.75 (2.37,3.19)    | 3.72 (3.07,5.52)                 | 2.8 (2.41,3.25)                     | 2.81 (2.42,3.26)                             | 2.85 (2.45,3.30)                | 2.14 (2.02,2.27)    | 1.86 (1.72,2.002)                | 2.13 (2.01,2.25)                    | 2.2 (2.07,2.32)                              | 2.14 (2.02,2.27)                |
| Poorest                                | 3.95 (3.39,4.6)     | 4.83 (3.97,5.88)                 | 4.03 (3.46,4.69)                    | 4.05 (3.47,4.72)                             | 4.08 (3.5,4.75)                 | 2.67 (2.5,2.84)     | 2.14 (1.99,2.32)                 | 2.65 (2.49,2.82)                    | 2.7 (2.54,2.88)                              | 2.7 (2.5,2.84)                  |
| <b>Education (Post graduate)</b>       | 1.00                | 1.00                             | 1.00                                | 1.00                                         | 1.00                            | 1.00                | 1.00                             | 1.00                                | 1.00                                         | 1.00                            |
| College                                | 1.59 (0.91,2.8)     | 1.61 (0.92,2.82)                 | 0.98 (0.37,2.58)                    | 1.58 (0.9,2.78)                              | 1.57 (0.9,2.75)                 | 1.84 (1.55,2.19)    | 1.83 (1.54,2.17)                 | 1.1 (0.85,1.42)                     | 1.82 (1.53,2.17)                             | 1.84 (1.55,2.19)                |
| High School                            | 1.78 (1.06,2.99)    | 1.67 (1.01,,2.82)                | 1.95 (0.83,4.56)                    | 1.62 (0.96,2.72)                             | 1.61 (0.99,2.7)                 | 2.19 (1.86,2.57)    | 2.13 (1.82,2.51)                 | 1.47 (1.17,1.85)                    | 2.15 (1.82,2.54)                             | 2.21 (1.88,2.6)                 |
| Primary                                | 2.78 (1.66,4.68)    | 2.62 (1.56,4.41)                 | 3.32 (1.42,7.76)                    | 2.54 (1.51,4.29)                             | 2.52 (1.5,4.24)                 | 2.87 (2.44,3.4)     | 2.83 (2.4,3.33)                  | 2.03 (1.61,2.56)                    | 2.86 (2.42,3.37)                             | 2.89 (2.45,3.41)                |
| No education                           | 4.78 (2.84,8.04)    | 4.91 (2.93,8.23)                 | 6.89 (2.53,13.73)                   | 4.72 (2.81,7.93)                             | 4.66 (2.77,7.81)                | 3.85 (3.27,4.53)    | 3.75 (3.19,4.42)                 | 2.58 (2.04,3.24)                    | 3.8 (3.22,4.48)                              | 3.85 (3.27,4.53)                |
| <b>Living Environment (Large city)</b> | 1.00                | 1.00                             | 1.00                                | 1.00                                         | 1.00                            | 1.00                | 1.00                             | 1.00                                | 1.00                                         | 1.00                            |
| Small City                             | 0.91 (0.75,1.09)    | 0.98 (0.82,1.17)                 | 1.01 (0.84,1.21)                    | 0.78 (0.58,1.04)                             | 1.004 (0.84,1.2)                | 1.23 (1.13,1.32)    | 1.25 (1.15,1.35)                 | 1.22 (1.13,1.32)                    | 0.97 (0.86,1.1)                              | 1.2 (1.11,1.29)                 |
| Town                                   | 1.19 (1.03,1.37)    | 1.2 (1.04,1.38)                  | 1.22 (1.05,1.4)                     | 1.31 (1.06,1.62)                             | 1.23 (1.1,1.41)                 | 1.36 (1.27,1.45)    | 1.37 (1.29,1.47)                 | 1.36 (1.27,1.45)                    | 0.95 (0.86,1.04)                             | 1.34 (1.25,1.43)                |

|                            |                     |                      |                     |                  |                     |                     |                     |                     |                  |                      |
|----------------------------|---------------------|----------------------|---------------------|------------------|---------------------|---------------------|---------------------|---------------------|------------------|----------------------|
| Village                    | 1.4<br>(1.24,1.59)  | 1.28<br>(1.13,1.46)  | 1.31<br>(1.16,1.49) | 1.37 (1.14,1.66) | 1.32<br>(1.16,1.49) | 1.07<br>(1.01,1.14) | 1.09<br>(1.02,1.16) | 1.08<br>(1.02,1.15) | 0.69 (0.64,0.75) | 1.07<br>(1.005,1.13) |
| <b>Caste/Tribe (Other)</b> | 1.00                | 1.00                 | 1.00                | 1.00             | 1.00                | 1.00                | 1.00                | 1.00                | 1.00             | 1.00                 |
| SC                         | 1.5<br>(1.39,1.62)  | 1.55<br>(1.43,1.67)  | 1.54<br>(1.43,1.67) | 1.54 (1.43,1.67) | 1.4 (1.27,1.55)     | 1.28<br>(1.23,1.33) | 1.28<br>(1.23,1.36) | 1.28<br>(1.23,1.33) | 1.29 (1.24,1.34) | 1.28<br>(1.22,1.35)  |
| ST                         | 2.04<br>(1.86,2.24) | 2.11 (1.92, 2.3)     | 2.11<br>(1.93,2.31) | 2.11 (1.93,2.31) | 1.99<br>(1.79,2.23) | 1.53<br>(1.46,1.6)  | 1.53<br>(1.46,1.61) | 1.53<br>(1.46,1.61) | 1.52 (1.45,1.6)  | 1.48<br>(1.39,1.58)  |
| OBC                        | 1.11<br>(1.03,1.2)  | 1.17<br>(1.08,1.26)  | 1.16<br>(1.08,1.26) | 1.16 (1.08,1.25) | 1.13<br>(1.03,1.24) | 1.03<br>(0.99,1.07) | 1.03<br>(0.99,1.07) | 1.03<br>(0.99,1.07) | 1.03 (0.99,1.07) | 1.06<br>(1.02,1.12)  |
| No Caste or missing        | 0.7<br>(0.6,0.81)   | 0.74<br>(0.64,0.86)  | 0.72<br>(0.62,0.85) | 0.73 (0.62,0.85) | 1.01 (0.85,1.2)     | 1.02<br>(0.95,1.09) | 1.02<br>(0.96,1.09) | 1.02<br>(0.95,1.09) | 1.01 (0.95,1.08) | 0.92<br>(0.85,1.01)  |
| <b>Survey Year (Yr)</b>    |                     | 1.004<br>(0.98,1.03) | 0.89<br>(0.31,2.56) | 0.67 (0.55,0.83) | 0.57<br>(0.51,0.63) |                     | 0.81<br>(0.75,0.87) | 0.54<br>(0.4,0.74)  | 0.52 (0.47,0.56) | 1.02<br>(0.97,1.07)  |
| Yr*Richer                  |                     | 0.66 (0.5,0.87)      |                     |                  |                     |                     | 1.09<br>(0.99,1.21) |                     |                  |                      |
| Yr*Middle                  |                     | 0.47<br>(0.36,0.61)  |                     |                  |                     |                     | 1.21 (1.1,1.34)     |                     |                  |                      |
| Yr *Poorer                 |                     | 0.56<br>(0.44,0.72)  |                     |                  |                     |                     | 1.3 (1.18,1.43)     |                     |                  |                      |
| Yr *Poorest                |                     | 0.71<br>(0.56,0.91)  |                     |                  |                     |                     | 1.5 (1.37,1.64)     |                     |                  |                      |
| Yr *College                |                     |                      | 1.98<br>(0.6,6.52)  |                  |                     |                     |                     | 2.26<br>(1.6,3.21)  |                  |                      |
| Yr * High School           |                     |                      | 0.77<br>(0.26,2.22) |                  |                     |                     |                     | 1.94<br>(1.41,2.67) |                  |                      |
| Yr * Primary               |                     |                      | 0.61<br>(0.21,1.75) |                  |                     |                     |                     | 1.74<br>(1.27,2.4)  |                  |                      |
| Yr * No education          |                     |                      | 0.7 (0.24,2.0)      |                  |                     |                     |                     | 1.94<br>(1.41,2.66) |                  |                      |
| Yr*Small City              |                     |                      |                     | 1.44 (0.99,2.07) |                     |                     |                     |                     | 1.61 (1.38,1.88) |                      |
| Yr * Town                  |                     |                      |                     | 0.89 (0.68,1.16) |                     |                     |                     |                     | 1.94 (1.72,2.19) |                      |
| Yr * Village               |                     |                      |                     | 0.92 (0.74,1.15) |                     |                     |                     |                     | 2.26 (2.06,2.48) |                      |
| Yr *SC                     |                     |                      |                     |                  | 1.29<br>(1.11,1.51) |                     |                     |                     |                  | 0.99<br>(0.93,1.07)  |
| Yr *ST                     |                     |                      |                     |                  | 1.16<br>(0.99,1.36) |                     |                     |                     |                  | 1.07<br>(0.98,1.16)  |
| Yr*OBC                     |                     |                      |                     |                  | 1.1 (0.96,1.27)     |                     |                     |                     |                  | 0.95<br>(0.89,1.01)  |
| Yr*No Caste                |                     |                      |                     |                  | 0.45                |                     |                     |                     |                  | 1.22                 |



1  
2  
3  
4  
5  
6  
7  
8  
9  
10  
11  
12  
13  
14  
15  
16  
17  
18  
19  
20  
21  
22  
23  
24  
25  
26  
27  
28  
29  
30  
31  
32  
33  
34  
35  
36  
37  
38  
39  
40  
41  
42  
43  
44  
45  
46  
47  
48  
49

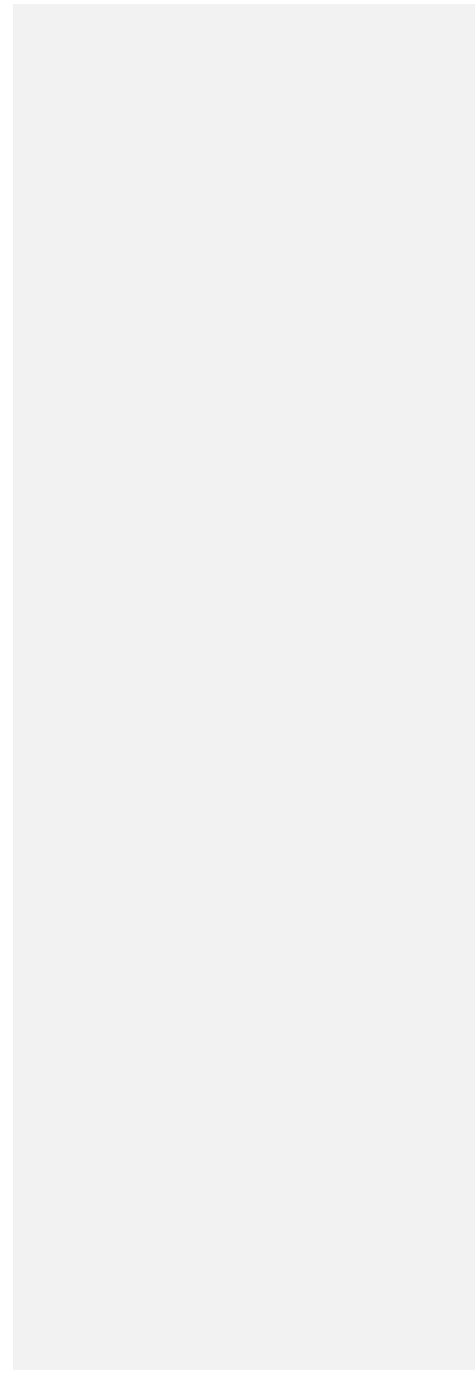

|                                              |  |                  |                 |                  |                 |  |                   |                  |                    |                   |
|----------------------------------------------|--|------------------|-----------------|------------------|-----------------|--|-------------------|------------------|--------------------|-------------------|
|                                              |  |                  |                 |                  | (0.32,0.63)     |  |                   |                  |                    | (1.07,1.38)       |
| <b>Fixed Part of the Model</b>               |  |                  |                 |                  |                 |  |                   |                  |                    |                   |
| Overall Chi for Interaction (p-value)        |  | 19.128 (p<0.001) | 0.041 (p=0.99)  | 50.195 (p<0.001) | 0.992 (p=0.91)  |  | 31.96 (p<0.0001)  | 17.42 (p=0.001)  | 157.008 (p<0.0001) | 2.665 (p=0.615)   |
| <b>Random Part of the Model</b>              |  |                  |                 |                  |                 |  |                   |                  |                    |                   |
| Chi square for Level 3: State (p-value)      |  | 12.91 (p=0.011)  | 12.91 (p=0.011) | 12.91 (p=0.004)  | 12.91 (p=0.011) |  | 12.94 (p=0.011)   | 12.94 (p=0.011)  | 12.94 (p=0.004)    | 12.94 (p=0.011)   |
| Chi square for Level 2: Local Area (p-value) |  | 260.98 (p<0.001) | 266.3 (p<0.001) | 264.9 (p<0.001)  | 263.5 (p<0.001) |  | 844.91 (p<0.0001) | 839.3 (p<0.0001) | 824.92 (p<0.0001)  | 837.64 (p<0.0001) |

\*Models are controlled for age (centered at 29 years), marital status and religion

**Web Table 13: Frequency and prevalence (%) of tobacco smoking, chewing and dual use (smoking and chewing) by living environment, age, religion and marital status among men and women in the National Family Health Surveys 1998-99 and 2005-6**

|                          | Sample Population        |                          | MEN                  |                      |         |                      |                      |         | FEMALE               |                      |                      |                      |        |                      |                      |        |                       |                      |        |
|--------------------------|--------------------------|--------------------------|----------------------|----------------------|---------|----------------------|----------------------|---------|----------------------|----------------------|----------------------|----------------------|--------|----------------------|----------------------|--------|-----------------------|----------------------|--------|
|                          |                          |                          | SMOKE                |                      |         | CHEW                 |                      |         | DUAL                 |                      |                      | SMOKE                |        |                      | CHEW                 |        |                       | DUAL                 |        |
|                          | 1998-9                   | 2005-6                   | 1998-9               | 2005-6               | % Δ     | 1998-9               | 2005-6               | % Δ     | 1998-9               | 2005-6               | % Δ                  | 1998-9               | 2005-6 | % Δ                  | 1998-9               | 2005-6 | % Δ                   | 1998-9               | 2005-6 |
| <b>Area of residence</b> |                          |                          |                      |                      |         |                      |                      |         |                      |                      |                      |                      |        |                      |                      |        |                       |                      |        |
| Large city               | (M) 17,640<br>(F) 16,081 | (M) 19,092<br>(F) 26,272 | 17.7<br>(16.6, 18.9) | 27.2<br>(25.7, 28.8) | 54      | 19.1<br>(17.4, 21.1) | 30.3<br>(28.2, 32.5) | 59      | 6.05<br>(5.4, 6.8)   | 10.2<br>(9.2, 11.3)  | 0.3<br>(0.2, 0.4)    | 0.4<br>(0.3, 0.6)    | 33     | 5.8<br>(4.9, 6.9)    | 4.9<br>(4.1, 5.9)    | -16    | 0.09<br>(0.06, 0.14)  | 0.055<br>(0.03, 0.1) |        |
| Small city               | (M) 8,957<br>(F) 8,573   | (M) 4,723<br>(F) 9,318   | 18.3<br>(16.4, 20.2) | 28.8<br>(26.5, 31.2) | 57      | 19.4<br>(17.1, 22.0) | 34.2<br>(31.1, 37.4) | 76      | 5.8<br>(4.9, 6.8)    | 10.9<br>(9.6, 12.5)  | 0.3<br>(0.2, 0.5)    | 0.5<br>(0.35, 0.7)   | 67     | 5.9<br>(4.8, 7.1)    | 6.6<br>(5.5, 8.1)    | 12     | 0.06<br>(0.03, 0.14)  | 0.09<br>(0.04, 0.2)  |        |
| Town                     | (M) 18,837<br>(F) 18,803 | (M) 12,078<br>(F) 21,256 | 19.9<br>(18.6, 21.2) | 30.3<br>(28.4, 32.2) | 52      | 20.6<br>(18.7, 22.5) | 31.1<br>(28.6, 33.7) | 51      | 6.3<br>(5.6, 7.1)    | 10.5<br>(9.4, 11.7)  | 0.6<br>(0.5, 0.8)    | 0.6<br>(0.4, 0.8)    | 0      | 6.7<br>(5.8, 7.8)    | 7.2<br>(6.1, 8.4)    | 8      | 0.2<br>(0.15, 0.3)    | 0.1<br>(0.07, 0.2)   |        |
| Village                  | (M) 86,030<br>(F) 87,429 | (M) 33,862<br>(F) 67,296 | 28.9<br>(28.2, 29.6) | 35.2<br>(34.2, 36.2) | 22      | 28.2<br>(27.4, 28.9) | 40.9<br>(39.8, 41.9) | 45      | 11.4<br>(10.9, 11.8) | 15.0<br>(14.3, 15.7) | 2.04<br>(1.85, 2.24) | 1.98<br>(1.75, 2.24) | -3     | 9.8<br>(9.3, 10.3)   | 11.3<br>(10.6, 11.9) | 15     | 0.5<br>(0.43, 0.6)    | 0.4<br>(0.3, 0.5)    |        |
| <b>Age-groups</b>        |                          |                          |                      |                      |         |                      |                      |         |                      |                      |                      |                      |        |                      |                      |        |                       |                      |        |
| 15-24                    | (M) 50,266<br>(F) 52,299 | (M) 25,511<br>(F) 46,688 | 8.6<br>(8.2, 9.1)    | 19.2<br>(18.4, 20.1) | 12<br>3 | 14.3<br>(13.7, 14.9) | 30.3<br>(29.2, 31.4) | 11<br>2 | 3.5<br>(3.3, 3.8)    | 9.45<br>(8.9, 10.1)  | 0.4<br>(0.31, 0.45)  | 0.3<br>(0.21, 0.36)  | -25    | 3.1<br>(2.8, 3.3)    | 4.4<br>(3.99, 4.7)   | 42     | 0.098<br>(0.07, 0.14) | 0.08<br>(0.05, 0.13) |        |
| 25-34                    | (M) 38,650<br>(F) 40,764 | (M) 20,794<br>(F) 38,441 | 29.1<br>(28.3, 29.9) | 36.3<br>(35.2, 37.4) | 25      | 29.9<br>(29.1, 30.7) | 43.1<br>(41.9, 44.3) | 44      | 11.5<br>(10.9, 12.0) | 16.0<br>(15.2, 16.8) | 1.4<br>(1.26, 1.62)  | 1.3<br>(1.1, 1.56)   | -7     | 9.0<br>(8.5, 9.5)    | 10.1<br>(9.45, 10.7) | 12     | 0.33<br>(0.27, 0.4)   | 0.23<br>(0.2, 0.3)   |        |
| 35-49                    | (M) 42,548<br>(F) 37,823 | (M) 23,450<br>(F) 39,013 | 43.4<br>(42.5, 44.2) | 44.1<br>(42.9, 45.2) | 1.6     | 35.3<br>(34.4, 36.2) | 40.2<br>(39.0, 41.3) | 14      | 15.7<br>(15.1, 16.3) | 15.2<br>(14.4, 16.0) | 3.4<br>(3.1, 3.8)    | 3.2<br>(2.84, 3.57)  | -6     | 16.5<br>(15.8, 17.3) | 15.7<br>(14.9, 16.4) | -5     | 0.9<br>(0.76, 1.02)   | 0.6<br>(0.5, 0.7)    |        |
| <b>Marital Status</b>    |                          |                          |                      |                      |         |                      |                      |         |                      |                      |                      |                      |        |                      |                      |        |                       |                      |        |

Formatted: Superscript, Kern at 8 pt

|                             |                            |                           |                     |                      |     |                     |                     |     |                     |                     |                   |                     |     |                     |                     |     |                     |                     |
|-----------------------------|----------------------------|---------------------------|---------------------|----------------------|-----|---------------------|---------------------|-----|---------------------|---------------------|-------------------|---------------------|-----|---------------------|---------------------|-----|---------------------|---------------------|
| <i>Currently married</i>    | (M) 77,233<br>(F) 95,398   | (M) 40,529<br>(F) 87,754  | 36.9<br>(36.2,37.6) | 40.6<br>(39.7,41.5)  | 10  | 33.7<br>(32.9,34.4) | 42.9<br>(41.9,43.9) | 27  | 13.9<br>(13.5,14.4) | 15.9<br>(15.3,16.6) | 1.8<br>(1.6,1.94) | 1.8<br>(1.6,2.02)   | 0   | 9.8<br>(9.3,10.3)   | 10.9<br>(10.4,11.5) | 11  | 0.43<br>(0.37,0.5)  | 0.3<br>(0.26,0.4)   |
| <i>Single</i>               | (M) 52,443<br>(F) 29,623   | (M) 28,377<br>(F) 30,606  | 7.6<br>(7.3,8.04)   | 18.9<br>(18.2,19.7)  | 149 | 12.5<br>(11.9,12.9) | 27.4<br>(26.4,28.4) | 119 | 2.9<br>(2.7,3.2)    | 8.6<br>(8.1,9.2)    | 0.3<br>(0.22,0.4) | 0.09<br>(0.06,0.14) | -70 | 1.9<br>(1.8,2.2)    | 2.8<br>(2.5,3.2)    | 47  | 0.12<br>(0.08,0.18) | 0.03<br>(0.01,0.06) |
| <i>Widowed</i>              | (M) 1,070<br>(F) 4,038     | (M) 415<br>(F) 3,909      | 48.7<br>(45.1,52.3) | 50.1<br>(43.9,56.3)  | 2.8 | 41.6<br>(38.0,45.3) | 59.5<br>(53.2,65.6) | 43  | 19.5<br>(16.8,22.5) | 23.7<br>(18.7,29.6) | 4.7<br>(3.86,5.6) | 3.5<br>(2.78,4.3)   | -26 | 21.3<br>(19.7,22.9) | 18.5<br>(16.9,20.2) | -13 | 1.4<br>(1.05,1.89)  | 0.9<br>(0.6,1.4)    |
| <i>Divorced/separated</i>   | (M) 718<br>(F) 1,827       | (M) 434<br>(F) 1,873      | 41.7<br>(37.2,46.4) | 46.6<br>(39.9,53.3)  | 12  | 33.4<br>(29.0,38.1) | 55.9<br>(49.0,62.7) | 67  | 15.7<br>(12.5,19.5) | 25.2<br>(19.7,31.6) | 2.5<br>(1.8,3.6)  | 1.6<br>(1.0,2.6)    | -36 | 18.1<br>(15.9,20.6) | 18.6<br>(16.4,21.0) | 3   | 0.31<br>(0.13,0.75) | 0.6<br>(0.3,1.2)    |
| <b>Religion<sup>2</sup></b> |                            |                           |                     |                      |     |                     |                     |     |                     |                     |                   |                     |     |                     |                     |     |                     |                     |
| <i>Hindu</i>                | (M) 100,339<br>(F) 99,430  | (M) 51,174<br>(F) 89,888  | 26.1<br>(25.5,26.7) | 33.01<br>(32.2,33.8) | 27  | 26.6<br>(26.0,27.3) | 38.2<br>(37.3,39.1) | 44  | 10.2<br>(9.8,10.5)  | 13.7<br>(13.2,14.3) | 1.5<br>(1.4,1.7)  | 1.5<br>(1.35,1.7)   | 0   | 8.8<br>(8.3,9.2)    | 9.6<br>(9.1,10.2)   | 9   | 0.37<br>(0.31,0.43) | 0.25<br>(0.2,0.3)   |
| <i>Muslim</i>               | (M) 16,278<br>(F) 16,215   | (M) 9,145<br>(F) 16,731   | 28.3<br>(26.7,29.9) | 36.2<br>(34.3,38.2)  | 28  | 23.4<br>(21.7,25.1) | 37.4<br>(35.0,39.8) | 60  | 9.5<br>(8.7,10.5)   | 13.1<br>(11.9,14.5) | 1.9<br>(1.6,2.3)  | 1.73<br>(1.25,2.4)  | -9  | 9.1<br>(8.3,9.9)    | 9.9<br>(8.9,10.9)   | 9   | 0.5<br>(0.37,0.7)   | 0.4<br>(0.3,0.7)    |
| <i>Christian</i>            | (M) 8,055<br>(F) 8,547     | (M) 6,250<br>(F) 10,974   | 28.2<br>(25.9,30.5) | 33.1<br>(29.9,36.4)  | 17  | 17.5<br>(15.1,20.1) | 29.1<br>(25.0,33.5) | 66  | 8.2<br>(6.9,9.6)    | 12.7<br>(10.4,15.5) | 2.4<br>(1.7,3.3)  | 1.3<br>(0.98,1.62)  | -46 | 9.9<br>(8.4,11.6)   | 10.7<br>(9.1,12.5)  | 8   | 0.98<br>(0.72,1.33) | 0.6<br>(0.5,0.7)    |
| <i>Others</i>               | (M) 6,792<br>(F) 6,694     | (M) 3,186<br>(F) 6,549    | 11.1<br>(9.5,12.8)  | 16.2<br>(14.2,18.4)  | 46  | 19.3<br>(17.1,21.7) | 26.0<br>(23.1,29.2) | 35  | 4.4<br>(3.4,5.6)    | 6.5<br>(5.2,8.0)    | 0.6<br>(0.4,0.9)  | 0.4<br>(0.2,0.65)   | -33 | 7.5<br>(5.8,9.6)    | 7.6<br>(6.2,9.4)    | 1   | 0.27<br>(0.13,0.55) | 0.2<br>(0.1,0.6)    |
| <i>Total</i>                | (M) 131,464<br>(F) 130,886 | (M) 69,755<br>(F) 124,142 |                     |                      |     |                     |                     |     |                     |                     |                   |                     |     |                     |                     |     |                     |                     |

Formatted: Superscript, Kern at 8 pt

<sup>1</sup>Large city: urban population ≥1 million; Small city: 100000-1 million; Town: ≤100000 million  
<sup>2</sup>Scheduled castes and scheduled tribes are identified by the Government of India as socially and economically backward and needing protection from social injustice and exploitation. Other backward class is a diverse collection of intermediate castes that were considered low in the traditional caste hierarchy but are clearly above scheduled castes. General is thus a default residual group that enjoys higher status in the caste hierarchy.  
<sup>23</sup>Others include Sikh, Buddhist, Jain, Jewish, Zoroastrian and Others  
<sup>4</sup>Post-graduate:15 or more years of education; college: 13-15 years of education; high school: 8-12 years of education; secondary: 5-8 years of education; primary: 0-5 years of education; illiterate: 0 years of education  
 \*Percentage change (% Δ) numbers have been rounded to the nearest integer. Estimates are not age-standardized

1  
2  
3  
4  
5  
6  
7  
8  
9  
10  
11  
12  
13  
14  
15  
16  
17  
18  
19  
20  
21  
22  
23  
24  
25  
26  
27  
28  
29  
30  
31  
32  
33  
34  
35  
36  
37  
38  
39  
40  
41  
42  
43  
44  
45  
46  
47  
48  
49  
50  
51  
52  
53  
54  
55  
56  
57  
58  
59  
60

|

For peer review only

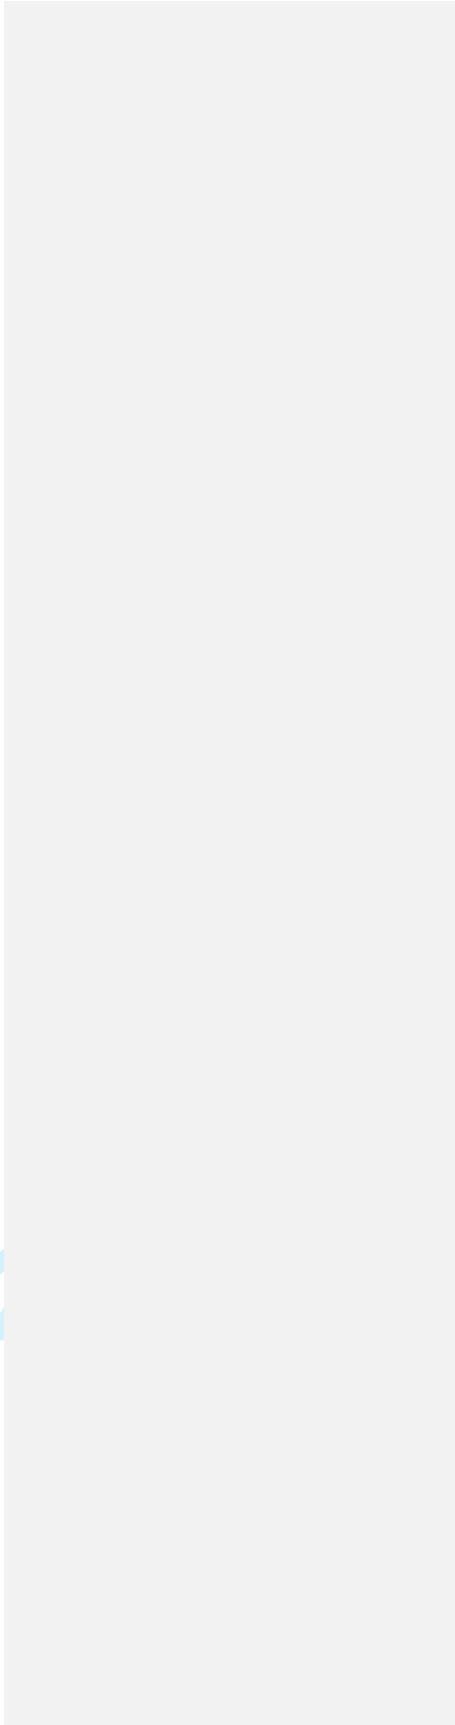

1  
2  
3  
4  
5  
6  
7  
8  
9  
10  
11  
12  
13  
14  
15  
16  
17  
18  
19  
20  
21  
22  
23  
24  
25  
26  
27  
28  
29  
30  
31  
32  
33  
34  
35  
36  
37  
38  
39  
40  
41  
42  
43  
44  
45  
46  
47  
48  
49  
50  
51  
52  
53  
54  
55  
56  
57  
58  
59  
60

Figure 1: Percentage change in smoking among men and women by education level and wealth quintiles

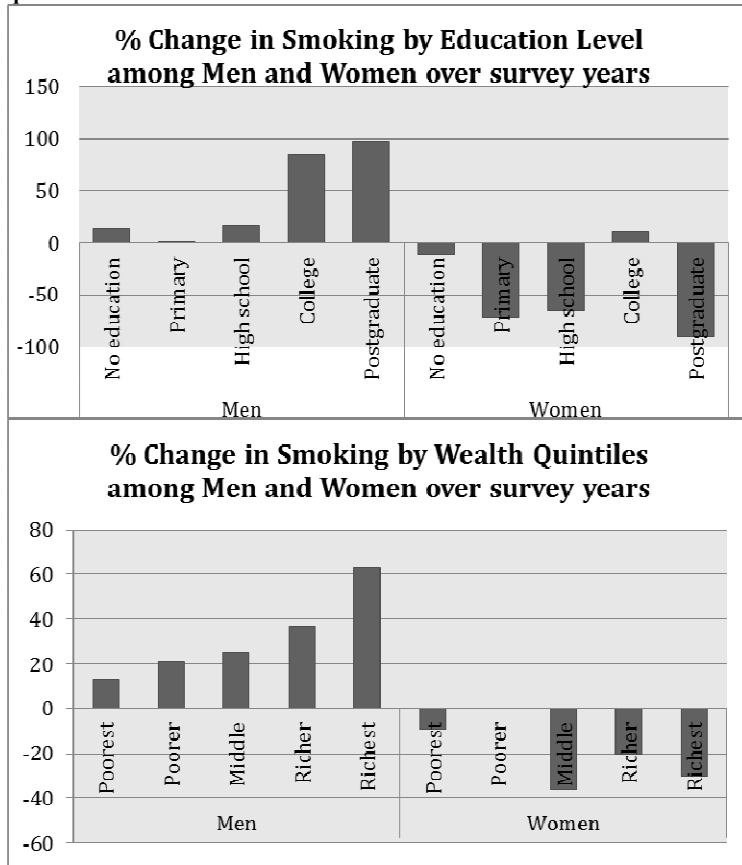

Figure 2: Percentage change in chewing among men and women by education level and wealth quintiles

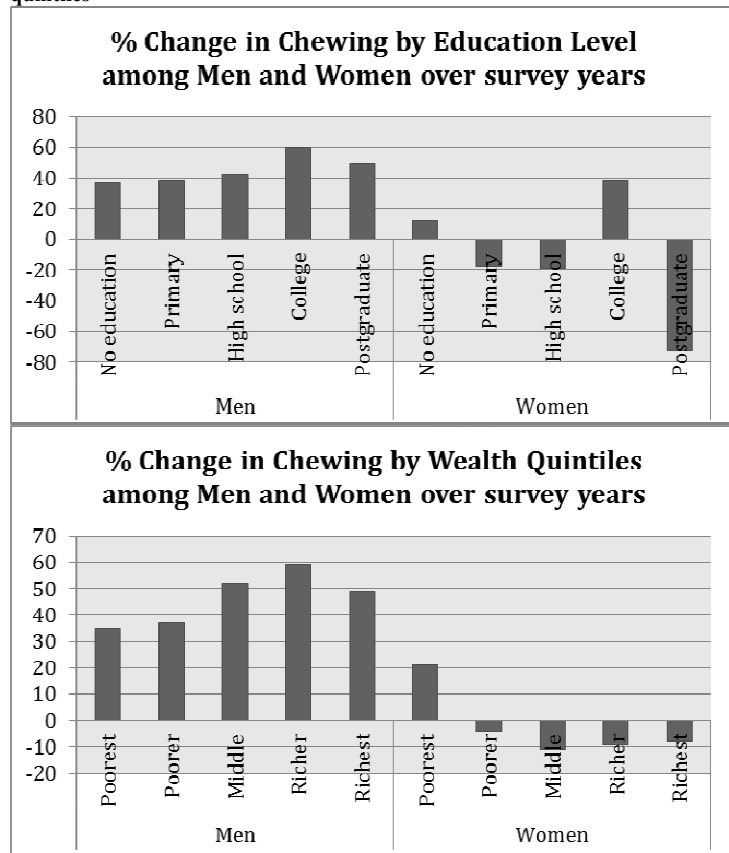

1  
2  
3  
4  
5  
6  
7  
8  
9  
10  
11  
12  
13  
14  
15  
16  
17  
18  
19  
20  
21  
22  
23  
24  
25  
26  
27  
28  
29  
30  
31  
32  
33  
34  
35  
36  
37  
38  
39  
40  
41  
42  
43  
44  
45  
46  
47  
48  
49  
50  
51  
52  
53  
54  
55  
56  
57  
58  
59  
60

For peer review only

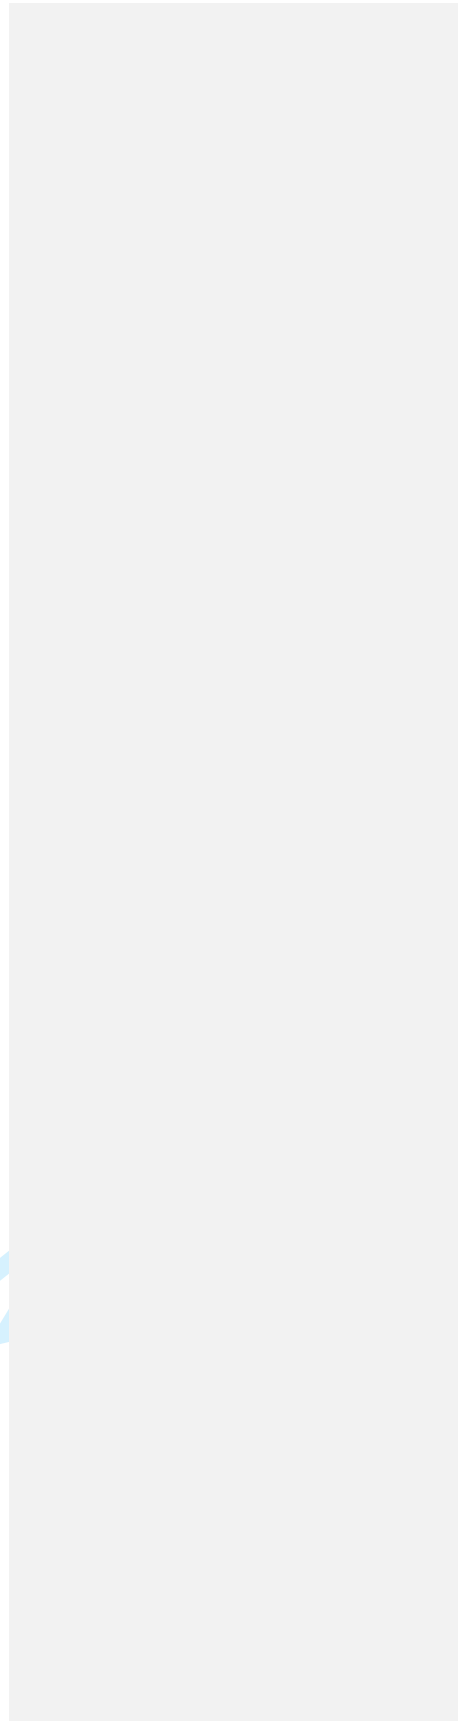

Figure 3: Probability of smoking and chewing among men and women by education and wealth

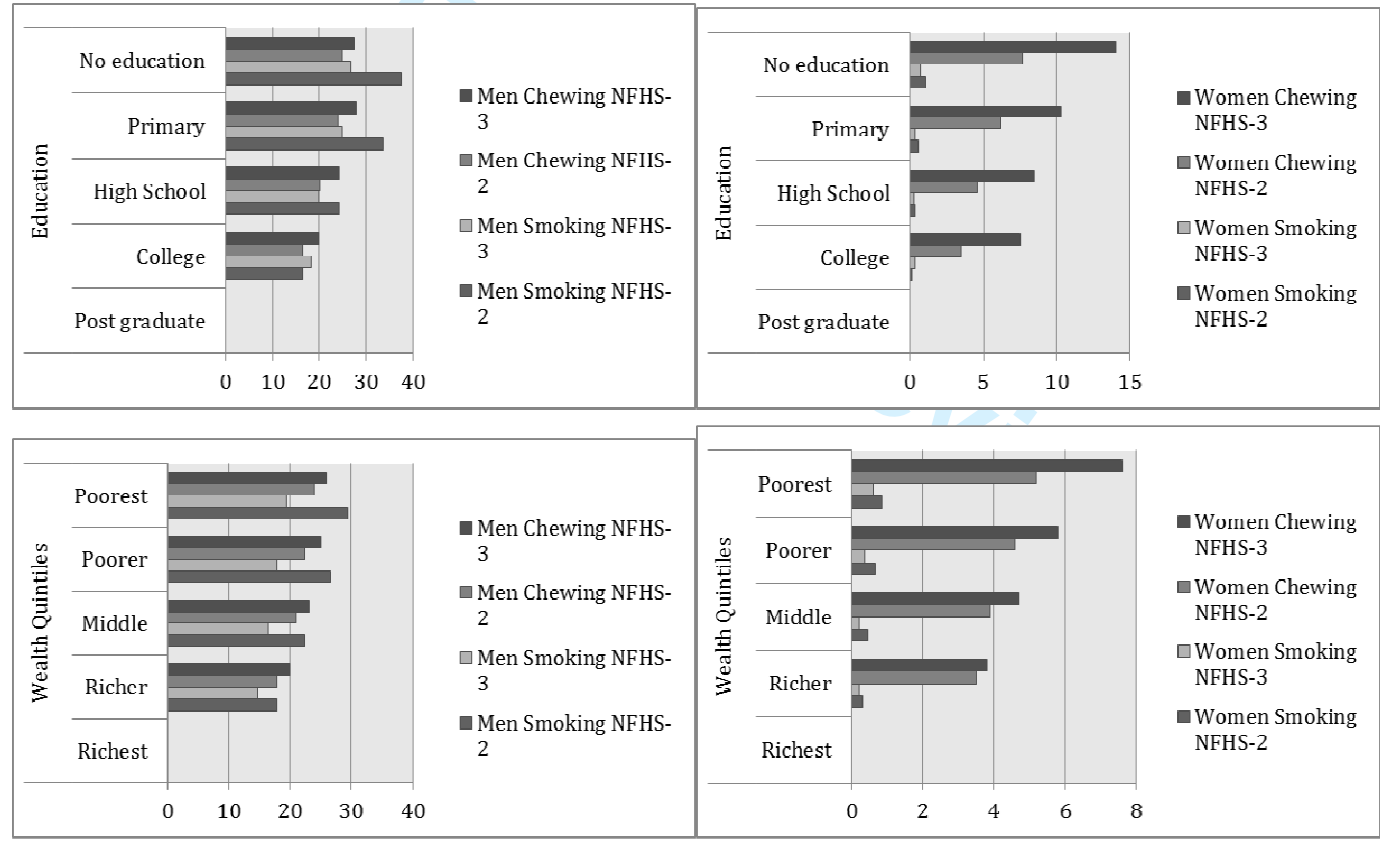



1  
2  
3  
4  
5  
6  
7  
8  
9  
10  
11  
12  
13  
14  
15  
16  
17  
18  
19  
20  
21  
22  
23  
24  
25  
26  
27  
28  
29  
30  
31  
32  
33  
34  
35  
36  
37  
38  
39  
40  
41  
42  
43  
44  
45  
46  
47  
48  
49

For peer review only



32

## ACKNOWLEDGEMENTS

We acknowledge the support of Macro International Inc (Washington, DC) for providing access to the surveys.

**Competing Interests:** None

**Financial Disclosures:** None.

**Funding/Support:** There was no specific funding for this study. ~~None~~-NB is supported by the Presidential Scholarship at Harvard University. SA is supported by a Wellcome Trust Strategic Award Grant No. Z/041825. CM conducted this work during a Study Abroad Fellowship funded by the Leverhulme Trust. CM is also funded by the Higher Education Funding Council for England and the National Institute for Health Research.

**References Cited:**

1. Reddy KS, Prabhakaran D, Jeemon P, Thankappan KR, Joshi P, Chaturvedi V, Ramakrishnan L & Ahmed F. "Educational status and cardiovascular risk profile in Indians." *PNAS* 104.41 (2007): 16263-16268.
- 4-2. *WHO (2008). WHO Report on the Global Tobacco Epidemic, 2008: The MPOWER package. Geneva, World Health Organization, 2008.*
- 2-3. Murray CJL, & Lopez, AD. "Global mortality, disability and the contribution of risk factors: Global Burden of Disease Study." *The Lancet* 349 (1997a): 1436-42.
- 3-4. Murray CJL, & Lopez AD. "Alternative projections of mortality and disability by cause 1990-2020: Global Burden of Disease Study." *The Lancet* 349 (1997b): 1498-1504.
- 4-5. Rani M, Bonu S, Jha P, Nguyen S, Jamjoum L. "Tobacco use in India: prevalence and predictors of smoking and chewing in a national cross sectional household survey." *Tobacco Control* 12.4 (2003): e4.
- 5-6. Subramanian SV, Nandy S, Kelly M, Gordon D & Smith GD. "Patterns and distribution of tobacco consumption in India: cross sectional multilevel evidence from the 1998-9 National Family Health Survey." *BMJ* 328.7443 (2004): 801-6.
- 6-7. John RM, Rao RK, Rao MG, Moore J, Deshpande RS, Sengupta J, Selvaraj S, Chaloupka FJ, Jha P. *The economics of tobacco and tobacco taxation in India*. Paris: International Union against Tuberculosis and Lung Disease, 2010.
- 7-8. IIPS, & ORC Macro. *National Family Health Survey (NFHS-2), 1998-99*. Data. Mumbai, India: IIPS, 2000.
- 8-9. IIPS, & ORC Macro. *National Family Health Survey (NFHS-3), 2005-06: India: Vol I*. Data. Mumbai, India: IIPS, 2007.
- 9-10. Lopez AD, Collishaw NE, Piha T. "A descriptive model of the cigarette epidemic in developed countries." *Tobacco Control* 3 (1994): 242-247.
11. Thun M, Peto R, Boreham J, Lopez AD. "Stages of the cigarette epidemic on entering its second century." *Tobacco Control* 21 (2011): 96-101.
12. Sinha DN, Palipudi KM, Rolle I, et al. (2011). *Tobacco use among youth and adults in member countries of South-East Asia region: review of findings from surveys under the Global Tobacco Surveillance System*. *Indian J Public Health*. 2011; 55(3): 169-76
13. GOI. (2010). *Global Adult Tobacco Survey. GATS India 2009-10. Report*. Ministry of Health & Family Welfare, Government of India. Available online.
14. Jha P, Jacob B, Gajalakshmi V, Gupta PC et al. (2008). *A nationally representative case-control study of smoking and death in India*. *N Engl J Med*. 2008;358:1137-47
15. Dikshit R, Gupta PC, Ramasundarahettige C, et al. (2012). *Cancer mortality in India: a nationally representative survey*. *The Lancet*, Mar 28. Epub. DOI:10.1016/S0140-6736(12)60358-4
16. Critchley JA, Unal B. (2003). *Health effects associated with smokeless tobacco: a systematic review*. *Thorax* 2003; 58: 435-443.
- 40-17. *WHO (2008). WHO Report on the Global Tobacco Epidemic, 2008: The MPOWER package. "Gender, Women and the Tobacco Epidemic. Summary and Overview". Geneva, World Health Organization, 2008.*
18. Fernandez E, Garcia M, Schiaffino A, Borrás JM, Nebotm & Segura A. "Smoking initiation and cessation by gender and educational level in Catalonia, Spain." (2002).
19. Viswanath K, Ackerson LK, Sorensen G, et al. (2010). *Movies and TV influence tobacco use in India: findings from a national survey*. *PLoS One*. 2010;5(6):e11365
20. Stigler M, Dhavan P, Van Dusen D, et al. (2010). *Westernization and tobacco use among young people in Delhi, India*. *Soc Sci Med*. 2010; 71(5): 891-7

**Formatted:** Normal, Don't add space between paragraphs of the same style

**Formatted:** Font: 10 pt, Italic, Check spelling and grammar

**Formatted:** Font: Not Bold

**Formatted:** Normal

**Formatted:** Font: (Default) Times New Roman, 12 pt, English (U.S.)

**Formatted:** Normal, Don't add space between paragraphs of the same style

**Formatted:** Font: 10 pt, Check spelling and grammar

**Formatted:** Font: Not Italic

**Formatted:** Font: Not Italic

**Formatted:** Normal, Don't add space between paragraphs of the same style

**Formatted:** Font: Not Italic

1  
2  
3  
4  
5  
6  
7  
8  
9  
10  
11  
12  
13  
14  
15  
16  
17  
18  
19  
20  
21  
22  
23  
24  
25  
26  
27  
28  
29  
30  
31  
32  
33  
34  
35  
36  
37  
38  
39  
40  
41  
42  
43  
44  
45  
46  
47  
48  
49  
50  
51  
52  
53  
54  
55  
56  
57  
58  
59  
60

21. [Shah PB, Pednekar MS, Gupta PC, et al. \(2008\). The relationship between tobacco advertisements and smoking status of youth in India. Asian Pac J Cancer Prev. 2008;9\(4\):637-42](#)

22. [Ebrahim S, . "Surveillance and Monitoring for Chronic Diseases: A Vital Investment." The National Medical Journal of India. Editorial 22.3 \(2011\): 129-132.](#)

23. [Palipudi KM, Gupta PC, Sinha DN, et al. \(2012\). Social determinants of health and tobacco use in thirteen low and middle income countries: evidence from Global Adult tobacco Survey. Plos One. 2012. 7\(3\):e33466.](#)

44.

42. [Dikshit R, Gupta PC, Ramasundarahettige C, et al. \(2012\). Cancer mortality in India: a nationally representative survey. The Lancet, Mar 28. Epub](#)

43. [Ebrahim S, . "Surveillance and Monitoring for Chronic Diseases: A Vital Investment." The National Medical Journal of India. Editorial 22.3 \(2011\): 129-132.](#)

**Formatted:** Font: (Default) Times New Roman, 12 pt, Check spelling and grammar

**Formatted:** Normal, No bullets or numbering

**Formatted:** Font: 10 pt, Italic, Check spelling and grammar

**Formatted:** Normal, Indent: Left: 0.5", Don't add space between paragraphs of the same style, No bullets or numbering

**Formatted:** No bullets or numbering

**Formatted:** Indent: Left: 0.25", No bullets or numbering

peer review only



**Are socioeconomic disparities in tobacco consumption increasing in India? A repeated cross-sectional multilevel analysis**

|                                 |                                                                                                                                                                                                                                                                                                                                                                                                                                                                                                                                                                                                        |
|---------------------------------|--------------------------------------------------------------------------------------------------------------------------------------------------------------------------------------------------------------------------------------------------------------------------------------------------------------------------------------------------------------------------------------------------------------------------------------------------------------------------------------------------------------------------------------------------------------------------------------------------------|
| Journal:                        | <i>BMJ Open</i>                                                                                                                                                                                                                                                                                                                                                                                                                                                                                                                                                                                        |
| Manuscript ID:                  | bmjopen-2012-001348.R2                                                                                                                                                                                                                                                                                                                                                                                                                                                                                                                                                                                 |
| Article Type:                   | Research                                                                                                                                                                                                                                                                                                                                                                                                                                                                                                                                                                                               |
| Date Submitted by the Author:   | 23-Aug-2012                                                                                                                                                                                                                                                                                                                                                                                                                                                                                                                                                                                            |
| Complete List of Authors:       | Bhan, Nandita; Harvard School of Public Health, Society, Human Development and Health<br>Srivastava, Swati; Public Health Foundation of India,<br>Agrawal, Sutapa; South Asia Network for Chronic Diseases (SANCD),<br>Subramanyam, Malavika; School of Public Health, University of Michigan,<br>Center for Integrative Approaches to Health Disparities<br>Millett, Christopher; Imperial College, Primary Care and Social Medicine<br>Selvaraj, Sakthivel; Public Health Foundation of India,<br>Subramanian, S V; Harvard School of Public Health, Department of<br>Society, Human Development and |
| <b>Primary Subject Heading</b>: | Smoking and tobacco                                                                                                                                                                                                                                                                                                                                                                                                                                                                                                                                                                                    |
| Secondary Subject Heading:      | Global health, Epidemiology, Public health                                                                                                                                                                                                                                                                                                                                                                                                                                                                                                                                                             |
| Keywords:                       | PUBLIC HEALTH, PREVENTIVE MEDICINE, SOCIAL MEDICINE, Epidemiology < THORACIC MEDICINE                                                                                                                                                                                                                                                                                                                                                                                                                                                                                                                  |
|                                 |                                                                                                                                                                                                                                                                                                                                                                                                                                                                                                                                                                                                        |

SCHOLARONE™  
Manuscripts

1  
2  
3  
4  
5  
6  
7  
8  
9  
10  
11  
12  
13

## Are socioeconomic disparities in tobacco consumption increasing in India? A repeated cross-sectional multilevel analysis

14  
15

### Corresponding Author:

16 SV Subramanian

17 Professor of Population Health and Geography Department of Society, Human  
18 Development and Health, Harvard School of Public Health

19 7<sup>th</sup> Floor, Kresge Building, 677 Huntington Ave, Boston MA 02115, USA

20 Phone: +1 617 432 6299

21 Fax: +1 617 432 3123

22 Email: [svsubram@hsph.harvard.edu](mailto:svsubram@hsph.harvard.edu)

23  
24  
25  
26  
27

### Authors:

28 Nandita Bhan<sup>1</sup>

29 Swati Srivastava<sup>2</sup>

30 Sutapa Agrawal<sup>3</sup>

31 Malavika Subramanyam<sup>4</sup>

32 Christopher Millett<sup>5</sup>

33 Sakthivel Selvaraj<sup>2</sup>

34 SV Subramanian<sup>1</sup>

35  
36  
37  
38 <sup>1</sup> Department of Society, Human Development and Health, Harvard School of Public Health, Harvard  
39 University, Boston, USA

40 <sup>2</sup> Public Health Foundation of India (PHFI), New Delhi, India

41 <sup>3</sup> South Asia Network for Chronic Diseases (SANCD), New Delhi, India

42 <sup>4</sup> Center for Integrative Approaches to Health Disparities, School of Public Health, University of Michigan,  
43 Michigan, USA

44 <sup>5</sup> School of Public Health, Imperial College London, London, UK

45  
46  
47  
48  
49  
50  
51  
52  
53  
54  
55  
56  
57  
58  
59  
60

**Word Count: 2871 words**

**ABSTRACT: (291 words)**

**Objectives:** India bears a significant portion of the global tobacco burden with high prevalence of tobacco use. This study examines the socioeconomic patterning of tobacco use and identifies the changing gender and socioeconomic dynamics in light of the *Cigarette Epidemic Model*.

**Design:** Secondary analyses of second and third National Family Health Survey (NFHS) data.

**Setting & participants:** Data were analysed from 201,219 men and 255,028 women over two survey rounds.

**Outcomes & methods:** Outcomes included **smoking** (cigarettes, *bidis* and pipes/cigar), **chewed tobacco** (*paan masala*, *gutkha* and others) and **dual use**, examined by education, wealth, living environment and caste. Standardized prevalence and percentage change were estimated. Pooled multilevel models estimated the effect of socioeconomic covariates on the log odds of tobacco use by gender, along with fixed and random parameters.

**Findings:** Among men (2005-6), gradients in smoking by education (illiterate: 44% vs. postgraduates: 15%) and chewing (illiterate: 47% vs. postgraduate: 19%) were observed. Inverse gradients were also observed by wealth, living environment and caste. Chewed tobacco use by women showed inverse SES gradients comparing the illiterate (7.4%) vs. postgraduate (0.33%), and poorest (17%) vs. richest (2%) quintiles. However, proportional increases in smoking were higher among more educated (postgraduates (98%) vs. high schooling only (17%)) and chewing among richer (richest quintile (49%) vs. poorest quintile (35%)). Among women, higher educated showed larger declines for smoking - 90% (postgraduates) vs. 12% (illiterates). Younger men (15-24 years) showed increasing tobacco use (smoking: 123% and chewing: 112%). Older women (35-49 years) show higher prevalence of smoking (3.2%) compared to younger women (0.3%).

**Conclusions:** Indian tobacco use patterns show significant diversions from the *Cigarette Epidemic Model*— from gender and socioeconomic perspectives. Separate analysis by type is needed to further understand social determinants of tobacco use in India.

## Article Summary

### Article Focus

- India bears a significant burden of tobacco consumption, with high prevalence of smoking and chewing among men & women.
- Previous studies have established a unique social and spatial gradient in tobacco use. However, no studies have yet reported estimates for changing patterns in tobacco use prevalence or relative risk over time.
- This study estimates socioeconomic patterns and examines the changing gender and socioeconomic dynamics of tobacco use in light of the *Cigarette Epidemic Model*.

### Key Messages

- Among men, higher prevalence of smoking and chewing for less educated, poorer, rural and lower caste. Sharp and rising inequalities by survey year, but percentage change shows increases are greater among higher SES groups – higher education, urban, richer populations, previously unreported.
- Low and declining risks of smoking and chewing among women. Higher rates of chewing compared to smoking. Increase in smoking with urbanization for women. Greater declines over time for higher educated women.
- Significant changing trend by wealth, education and living environment in smoking among men and in chewing among women. Increases in smoking prevalence among younger men (15-24 years) and chewing among younger women (15-24 years).

### Strengths & limitations

- First systematic examination of socioeconomic patterns in tobacco use in India, highlighting SES gradients in use and risks among vulnerable populations.
- Large sample, representative and generalizable surveys providing repeated and comparable estimates over time.
- Limitations: a) cross-sectional data, limiting scope for causal inference, b) lack of data by tobacco type or volume of use, c) data from a reproductive health survey may suffer from social desirability bias.



## INTRODUCTION

Global estimates indicate that one in ten adult deaths can be attributed to tobacco consumption, leading to approximately 5 million global deaths per year[1-4]. Of these, 2.4 million deaths occur in developing countries. India bears a significant portion of this global tobacco burden[3-4]. Consumption of both smoked and smoke-less (chewed and inhaled) forms of tobacco is highly prevalent among men (47%) and women (14%)[5]. However, previous studies have indicated that tobacco use, like other non-communicable disease risk factors, is unequally distributed across different social determinants in India – education, caste and wealth – among both men and women[1,5-7], indicating a distinct ‘economic and spatial distribution’ in tobacco use[6]. No studies have yet systematically examined patterns and changes in the prevalence of tobacco consumption in India by socioeconomic factors over time.

In this study, we aim to provide estimates and inferences on the changing gradient of tobacco consumption in India, analysing prevalence and odds ratio patterns from the National Family Health Surveys[8-9]. We discuss our findings in light of the Cigarette Epidemic Model[10-11] and examine what populations show higher and lower prevalence of tobacco consumption over time.

## METHODS

Data were analysed from two rounds of the Indian National Family Health Survey (NFHS 2 and 3) conducted during 1998-99 and 2005-06 respectively. NFHS is a nationally representative cross-sectional survey that is collected and managed by the Indian Institute of Population Sciences (IIPS) in Mumbai, India. These surveys provide vital sources of information on demographic, health and socioeconomic behaviour of Indian households. Data from men and women in the age group of 15-49 years were used from both survey rounds to ensure comparability. Data are representative of all Indian states (except the small Union Territories), hence covering almost 99 per cent of the

country's population. The surveys were collected using multistage cluster random sampling techniques. Rural and urban areas were sampled separately and a uniform sample design was followed in each state; states and PSUs are considered as levels. Individual questionnaires for men and women were used to interview usual residents of the household or visitors who stayed in the house the night before. Further details on sample design, including sampling framework and sample implementation, are provided in the basic survey reports by IIPS [8-9].

Outcomes of interest included **smoking** (cigarettes, *bidis*<sup>1</sup> and pipes/cigar), **chewing tobacco** (*paan masala*<sup>2</sup>, *gutkha*<sup>3</sup> or other chewed forms of tobacco) and **dual use** (consuming both smoked and chewed forms) of tobacco. NFHS-3 provides details on the different types of smoked and chewed tobacco products, but this information was unavailable in NFHS-2. The main covariates of interest were age, marital status and education at the individual level, and household wealth, area of residence (urban/rural), religion and caste/tribe status at the household level (*Variable definitions are provided in Table 1*). Survey-weighted age-standardised prevalence estimates of smoking, chewing and dual use of tobacco along with percentage change were calculated. Pooled multi-level models with state, local area and individual as analytical levels were used to estimate the effect of wealth, education, living environment and caste on the log odds of smoking and chewing among men and women. Regression models were adjusted for age, religion and marital status. Survey year was used in the interaction terms to estimate a time trend in socioeconomic determinants of tobacco. Tests for trend included joint tests for significance of fixed parameters and significance tests for random parameters. Model estimates were maximum likelihood-based using the Iterative Generalized Least-Squares (IGLS) algorithm as implemented within the MLwin software programme (version 2.23).

## RESULTS

Data used in this analysis covered 131,464 men and 130,886 women residing in 92,486 households in NFHS-2 and 69,755 men and 124,142 women residing in 109,041

---

<sup>1</sup> *Bidis* are local inexpensive cigarettes, that are thinner and contain tobacco flakes rolled inside tendu leaves. Bidis are often smoked by poorer populations.

<sup>2</sup> *Paan Masala* is a powdered preparation of betel leaves combined with cured tobacco and/or areca nut, which has stimulating properties

<sup>3</sup> *Gutkha* is a savoury or sweet preparation containing areca nut, tobacco, catechu, paraffin and slaked lime.

1  
2  
3 households in NFHS-3, with an overall response rate of 96% for NFHS-2 and 98% for  
4 NFHS-3. Prevalence (%) of smoking, chewing and dual use of tobacco over two survey  
5 rounds are presented by the three primary markers of socioeconomic status (SES) -  
6 education, wealth and caste (Table 1) along with percentage change estimates. Estimates  
7 by living environment, marital status, age and religion are presented in the appendix  
8 (Web Table 1). Among men, the prevalence of tobacco use (smoking, chewing and dual  
9 use) was seen to increase across all socioeconomic groups. For instance, smoking has  
10 risen from 35.5% to 40.6% in the fifth (poorest) quintile, 30.6% to 36.5% in the fourth  
11 quintile, 25.6 to 31.4% in the middle quintile, 19.3% to 25.8% in the second quintile and  
12 11.9% to 19.9% in the first (richest) quintile (table 1). Chewed tobacco use increased  
13 from 34.4% to 47.1% among the illiterate populations, 30.2% to 41.9% among those with  
14 primary schooling only, 23.3% to 33.1% among those with high school education, 14.9%  
15 to 23.9% among those with college education and 12.4% to 18.5% among those with  
16 postgraduate degree. Higher prevalence of tobacco use among men in each survey round  
17 was seen for socioeconomically disadvantaged groups – with less educated, lower wealth,  
18 rural residence or lower caste showing an inverse SES gradient; however, greater  
19 proportional increases in prevalence over time were seen among higher SES groups. For  
20 instance, higher absolute smoking prevalence in NFHS-3 was seen among men in lower  
21 wealth quintiles compared to those in higher wealth quintiles (41% for fifth (poorest)  
22 quintile and 37% for fourth quintile, compared to 20% in first (richest) quintile and 26%  
23 in second quintile); higher percentage increases in smoking were recorded among first  
24 (richest) quintile (63%) and second quintile (37%) compared to fourth quintile (21%) and  
25 fifth (poorest) quintile (13%). Similar trend was seen for education with a 98% increase  
26 in prevalence among those with postgraduate education and 13% increase in prevalence  
27 among those with no education over the two survey rounds. Sharper inequalities with  
28 higher inter-group differences were seen for smoking compared to chewing. Prevalence  
29 of chewing among men in the richest quintile and with postgraduate education each  
30 increased by 49%, while that for the poorest increased by 35% and for those with no  
31 education increased by 37%.

32 Socioeconomic patterns for tobacco use among women differed distinctly. Overall  
33 prevalence rates of tobacco use among women were significantly lower than men. In  
34  
35  
36  
37  
38  
39  
40  
41  
42  
43  
44  
45  
46  
47  
48  
49  
50  
51  
52  
53  
54  
55  
56  
57  
58  
59  
60

1  
2  
3 2005-06, prevalence of smoking and chewing among women with no education was 2.3%  
4 and 13.3% respectively, while the same for men was 43.9% and 47.1% respectively  
5 (Table 1). Women in most SES categories showed a declining trend for tobacco use, and  
6 only scheduled caste women and those with college education showed small increases in  
7 smoking and chewing. Higher and more consistent declines in prevalence were seen for  
8 education, compared to wealth and caste. For instance, women with postgraduate  
9 education noted a 90% decrease in smoking and a 73% decrease in chewing (Table 1).  
10 Women in the first (richest) quintile showed a decline of 30% for smoking and 8% for  
11 chewing (Table 1). Results by area of residence (Web Table 1) showed an increase in  
12 risks for tobacco use with urbanization among both men and women, except in the  
13 prevalence of chewed tobacco among women. Figures 1-2 show the percentage change in  
14 smoking and chewing by education and wealth for men and women reflecting findings  
15 from table 1.  
16  
17  
18  
19  
20  
21  
22  
23  
24  
25  
26  
27

28 Tables 2-3 present results from pooled multilevel models showing odds ratios for  
29 smoking and chewing by education, wealth, living environment and caste, along with  
30 interactions with survey year. Gradients in odds ratios (95% CI) are seen by all four  
31 markers of SES among men and women for smoking and chewing with sharper  
32 inequalities seen for education and wealth, compared to other markers. Controlling for  
33 wealth, caste and living environment and compared to those with postgraduate education,  
34 the odds ratio of smoking for men with no education: 3.18 (95% CI: 2.96,3.43), with  
35 primary education: 2.73 (95% CI: 2.54,2.94), with high school education: 1.81 (95% CI:  
36 1.69,1.85) and with college education: 1.38 (95% CI: 1.28,1.49). Controlling for  
37 education, caste and living environment and compared to the first (richest) quintile, odds  
38 ratio for chewing in the second quintile: 1.43 (95% CI: 1.38,1.48), middle quintile: 1.75  
39 (95% CI: 1.68,1.82), fourth quintile: 1.92 (95% CI: 1.84,2.01) and fifth (poorest) quintile:  
40 2.1 (95% CI: 1.99,2.2). Interaction terms in the two tables provide effect estimates for  
41 change over the two survey rounds. Among men, significant parameters for interaction  
42 terms for smoking are seen by wealth, education (except college educated) and living  
43 environment (except small city); and for chewing by wealth, higher education and by  
44 residence in towns. The joint test for interaction of fixed terms is significant for smoking  
45  
46  
47  
48  
49  
50  
51  
52  
53  
54  
55  
56  
57  
58  
59  
60

1  
2  
3 by wealth (Joint test: 174.31,  $p < 0.001$ ), education (Joint test: 13.31,  $p = 0.009$ ) and living  
4 environment (Joint test: 13.44,  $p = 0.003$ ) and for chewing by wealth (Joint Test:  
5 15.63,  $p = 0.003$ ), representing robust change over time. Chi-square values for random  
6 parameters are significant both at state (Smoking  $\chi^2$ : 12.82,  $p = 0.0003$  and Chewing  
7  $\chi^2$ : 12.89,  $p = 0.0003$ ) and local area (Smoking  $\chi^2$ : 650.41,  $p < 0.0001$  and Chewing  
8  $\chi^2$ : 801.4,  $p < 0.0001$ ) level showing variation at both levels.  
9

10  
11  
12  
13  
14  
15  
16 Among women, controlling for education, caste and living environment and compared to  
17 those in the first (richest) quintile, the odds ratio of smoking in second quintile: 1.48  
18 (95% CI: 1.28, 1.71), middle quintile: 1.9 (95% CI: 1.64, 2.2), fourth quintile: 2.75 (95% CI:  
19 2.37, 3.19) and fifth (poorest) quintile: 3.95 (95% CI: 3.39, 4.6). Controlling for wealth,  
20 caste and living environment and compared to those with postgraduate education, odds  
21 ratio of chewing among women with college education: 1.84 (95% CI: 1.55, 2.19), high  
22 school education: 2.19 (95% CI: 1.86, 2.57), primary schooling: 2.87 (95% CI: 2.44, 3.4)  
23 and no education: 3.85 (95% CI: 3.27, 4.53). Significant odds ratios for interaction terms  
24 are seen for smoking by wealth (Joint test: 19.128,  $p < 0.0001$ ) and for chewing by wealth  
25 (Joint Test: 31.96,  $p < 0.0001$ ), education (Joint test: 17.42,  $p < 0.0001$ ) and living  
26 environment (Joint test: 157.008,  $p < 0.0001$ ). Chi-square values for random parameters are  
27 significant for both state (Smoking  $\chi^2$ : 12.91,  $p = 0.0004$  and Chewing  $\chi^2$ : 12.94,  
28  $p = 0.011$ ) and local area (Smoking  $\chi^2$ : 264,  $p < 0.0001$  and Chewing  $\chi^2$ : 839,  
29  $p < 0.0001$ ), showing variation at both levels. Figure 3 presents adjusted probability  
30 estimates for smoking and chewing among men and women by wealth and education  
31 from multilevel models, which show findings similar to prevalence estimates.  
32  
33  
34  
35  
36  
37  
38  
39  
40  
41  
42  
43  
44  
45  
46  
47

## 48 DISCUSSION

49 In 1994, Lopez et al.[10] proposed the four-stage *Cigarette Epidemic Model* discussing  
50 transitions in smoking prevalence, consumption amount and mortality in developed  
51 countries. As per the model in stage I, male smoking prevalence is comparatively low and  
52 rising (<20%) and female smoking prevalence does not exceed 5% due to sociocultural  
53 factors. In stage II, tobacco prevalence among men starts to rise rapidly and peaks around  
54  
55  
56  
57  
58  
59  
60

1  
2  
3 50-80% with female smoking increasing at a lagged pace behind men. In stage III,  
4 prevalence rates for smoking among men start to fall, with both male and female smoking  
5 converging. Increases are seen for smoking rates among younger compared to older  
6 populations. In stage IV, prevalence of smoking begins to decline for both men and  
7 women. Mortality attributable to smoking rises to about one-third for all men, with much  
8 lower mortality rates seen among women. This model was developed based on empirical  
9 data from developed countries and has not been tested in developing countries. However,  
10 in 2011 Thun et al.[11] proposed modifications to the model potentially relevant for  
11 developing countries and were the first to note that smoking patterns by gender in  
12 developing countries distinctly differ from patterns noted in developed countries. India  
13 shows a high and complex burden of tobacco consumption, as also reported in tobacco  
14 surveillance studies[2,12-13]. This paper uses empirical evidence to show that India is  
15 currently between stages II and III of the Cigarette Epidemic model on the basis of  
16 estimates of smoking for men, but distinctly differs from the model on the patterns seen  
17 for women.  
18  
19  
20  
21  
22  
23  
24  
25  
26  
27  
28  
29  
30  
31

32 Overall, several dissimilarities are noted in the Indian experience from this model. **First**,  
33 India's unique tobacco experience comprises a 'double burden' of smoked **and** chewed  
34 tobacco consumption. Patterns for smoking and chewing seem to follow trajectories that  
35 differ by education, living environment and wealth. Further, within smoking, differences  
36 potentially exist by SES in the consumption of cigarettes from *bidis*, which most data are  
37 unable to distinguish. The quantity and quality of these products may differentially  
38 determine the mortality burden attributable to tobacco use in India[14-16]. Assessment of  
39 the disease, mortality and cost burden of the tobacco epidemic needs to account for this  
40 complexity[14-15].  
41  
42  
43  
44  
45  
46  
47  
48

49 **Second**, socioeconomic and sociocultural dynamics play profound roles in impacting  
50 tobacco use in India. Differences in tobacco consumption are seen by major SES markers  
51 such as wealth, education, living environment and caste. Findings from this analysis  
52 indicate a dichotomy between **higher absolute prevalence** by lower caste, wealth and  
53 education levels; but **higher relative change in prevalence** over time by higher caste,  
54  
55  
56  
57  
58  
59  
60



1  
2  
3 wealth and education levels. *No previous study has reported this finding for India.*  
4  
5 Urbanization seems to be playing an increasing role in impacting tobacco use for men  
6  
7 and women. Further analyses by type and amount of tobacco consumed are needed to  
8  
9 systematically understand these patterns.

10  
11  
12 **Third**, social gradients in tobacco use (overall and by type of tobacco) in India distinctly  
13  
14 differ by gender. Despite women's empowerment, large-scale increases in women's  
15  
16 smoking as predicted by the Cigarette Epidemic Model are yet to be seen in India[10-11,  
17  
18 17-18]. Aggregate estimates show that women are far behind men in prevalence rates for  
19  
20 smoking; and smoking and chewing rates among women, barring a few groups, seem to  
21  
22 be declining. The reasons for this could be several. **First**, that Indian sociocultural  
23  
24 realities and lower acceptability of smoking among women lead to delays in age of  
25  
26 initiation of smoking and higher rates among older compared to younger women (Web  
27  
28 Table 1). Women's smoking has been linked to their empowerment, but this may be  
29  
30 confined to urban areas and it is possible that on average, smoking continues to remain a  
31  
32 social taboo among women. Representation of smoking in the media may also explain the  
33  
34 gender patterns in the use of tobacco; smoking has been projected as an expression of  
35  
36 masculinity among men and has moralistic connotations for women[19-21]. **Second**, an  
37  
38 economic perspective explaining the lower smoking rates among women in India may  
39  
40 attribute this statistic to women's unequal participation in the labor market and limited  
41  
42 access to personal disposable income. Higher smoking among women in cities may partly  
43  
44 indicate greater uptake of smoking by employed women. **Third**, given that data for this  
45  
46 analysis come from a reproductive health survey, it is possible that results for women are  
47  
48 an underestimate. Web table 1 indicates that older (above 35 years of age) women are  
49  
50 more likely use tobacco. However, patterns in this analysis match findings from other  
51  
52 tobacco studies such as the GATS in India (IIPS)[5-6], providing a counter to this  
53  
54 argument.

55  
56 **Finally**, evidence on the socioeconomic gradient in tobacco use in India needs to be  
57  
58 linked to its implications for tobacco-related mortality and morbidity[14-15]. Dikshit et  
59  
60 al.[15] provide the first estimates of cancer mortality in India, attributing a major

1  
2  
3 component of age-standardized cancer mortality from lung and oral cancers to high rates  
4 of tobacco use in India. Analyses stratifying cancer morbidity and mortality in India by  
5 SES have not yet been attempted, and the lack of reliable surveillance data for chronic  
6 diseases prevent exhaustive assessments of the impact of tobacco use on Indian current  
7 and future chronic disease burden[22].  
8  
9

10  
11  
12  
13  
14 This study provides a systematic examination of the socioeconomic patterns in tobacco  
15 use in India over time. Data in this analysis come from the NFHS, which is a large,  
16 representative and generalizable survey, providing a comparative picture of tobacco  
17 patterns over time. The limitations of this analysis are the following. First, the surveys are  
18 cross-sectional, hence limiting scope for causal inference. NFHS does not provide  
19 detailed data by type or volume of tobacco. Finally, NFHS is a reproductive health survey  
20 where women in the ages of 15-49 years are sampled. Men are sampled in the households  
21 of the female sample. This introduces the potential for two downward biases. The first  
22 pertains to *social desirability bias* particularly related to underestimation of smoking  
23 patterns in women's childbearing years. Second, since the sample of men is conditional  
24 on the households from which women were sampled, the pool of men sampled may not  
25 be representative. Despite these caveats, NFHS (and in general the demographic and  
26 health surveys) has proven to be representative and generalizable, and continues to be  
27 used in a number of studies related to tobacco[5-6]. In addition, our findings are  
28 consistent with estimates from studies using other surveys assessing the burden of  
29 tobacco and its drivers in India[2,23]. Tobacco burden in the 'productive' populations  
30 (14-50 years) not only represents the current burden of tobacco but may predict future  
31 morbidity.  
32  
33  
34  
35  
36  
37  
38  
39  
40  
41  
42  
43  
44  
45  
46  
47

48 We present empirical evidence that India is experiencing a unique economic and social  
49 transition in tobacco consumption, quite distinct from the experience of developed  
50 countries that is likely to manifest in a number of morbidities[2,14-15]. In order to ensure  
51 policy effectiveness to prevent and reduce the exposure to tobacco, there is a need to  
52 systematically monitor and examine the social inequities in tobacco use over time and  
53 channel interventions to the social groups that are most vulnerable to these inequalities.  
54  
55  
56  
57  
58  
59  
60



1  
2  
3  
4  
5  
6  
7  
8  
9  
10  
11  
12  
13  
14  
15  
16  
17  
18  
19  
20  
21  
22  
23  
24  
25  
26  
27  
28  
29  
30  
31  
32  
33  
34  
35  
36  
37  
38  
39  
40  
41  
42  
43  
44  
45  
46  
47  
48  
49  
50  
51  
52  
53  
54  
55  
56  
57  
58  
59  
60

For peer review only

**TABLES, FIGURES AND REFERENCES**

**Table 1: Prevalence (%) of tobacco smoking, chewing and dual use (smoking and chewing) by wealth, education and caste/tribe status among men and women in the National Family Health Surveys 1998-99 and 2005-6**

|                                        | Sample Population        |                          | MEN                     |                               |     |                          |                         |     |                         |                                 |                         | FEMALE                     |        |                         |                          |        |                           |                                 |        |     |
|----------------------------------------|--------------------------|--------------------------|-------------------------|-------------------------------|-----|--------------------------|-------------------------|-----|-------------------------|---------------------------------|-------------------------|----------------------------|--------|-------------------------|--------------------------|--------|---------------------------|---------------------------------|--------|-----|
|                                        |                          |                          | SMOKE                   |                               |     | CHEW                     |                         |     | DUAL                    |                                 |                         | SMOKE                      |        |                         | CHEW                     |        |                           | DUAL                            |        |     |
|                                        |                          |                          | 1998-9                  | 2005-6                        | % Δ | 1998-9                   | 2005-6                  | % Δ | 1998-9                  | 2005-6                          | % Δ                     | 1998-9                     | 2005-6 | % Δ                     | 1998-9                   | 2005-6 | % Δ                       | 1998-9                          | 2005-6 | % Δ |
| <b>Caste/ tribe status<sup>1</sup></b> |                          |                          |                         |                               |     |                          |                         |     |                         |                                 |                         |                            |        |                         |                          |        |                           |                                 |        |     |
| <i>General</i>                         | (M) 50,939<br>(F) 50,526 | (M) 21,850<br>(F) 41,844 | 22.2<br>(21.4,<br>22.9) | 28.8<br>(27.7,<br>29.9)       | 30  | 22.2<br>(21.4,23<br>.02) | 33.2<br>(31.8,<br>34.5) | 50  | 7.4<br>(6.9,7<br>.8)    | 10.8<br>(10.<br>0,11<br>.5)     | 1.0<br>(0.9,<br>1.1)    | 0.8<br>(0.55,<br>1.0)      | -20    | 6.6 (6.1,<br>7.1)       | 7.24<br>(6.6,7.<br>85)   | 10     | 0.24<br>(0.17,<br>0.3)    | 0.2<br>(0.11,0<br>.27)          |        |     |
| <i>SC</i>                              | (M) 21,491<br>(F) 21,045 | (M) 11,953<br>(F) 20,566 | 31.5<br>(30.5,<br>32.5) | 39.3<br>(37.8,<br>40.9)       | 25  | 27.8<br>(26.6,<br>29.1)  | 40.5<br>(38.8,<br>42.1) | 46  | 12.1<br>(11.4,<br>12.8) | 15.8<br>(14.<br>7,16<br>.9)     | 2.3<br>(1.9,2.<br>8)    | 2.4<br>(2.05,2<br>.8)      | 4      | 10.9<br>(10.1,11<br>.8) | 12.1<br>(11.2,1<br>2.9)  | 11     | 0.5<br>(0.4,0.<br>7)      | 0.4<br>(0.3,0.<br>6)            |        |     |
| <i>ST</i>                              | (M) 16,187<br>(F) 16,520 | (M) 8,453<br>(F) 16,518  | 30.6<br>(28.8,<br>32.3) | 36.6<br>(34.1,<br>39.1)       | 20  | 38.6<br>(36.9,<br>40.4)  | 52.6<br>(49.9,<br>55.3) | 36  | 14.5<br>(13.3,<br>15.6) | 18.6<br>(16.<br>7,20<br>.4)     | 3.0<br>(2.5,3.<br>6)    | 2.7<br>(2.04,3<br>.4)      | -10    | 18.5<br>(17.0,20<br>.1) | 25.08<br>(22.8,2<br>7.4) | 36     | 1.0<br>(0.7,1.<br>2)      | 0.9<br>(0.6,1.<br>3)            |        |     |
| <i>OBC</i>                             | (M) 36,381<br>(F) 36,290 | (M) 25,144<br>(F) 29,561 | 24.7<br>(23.9,<br>25.5) | 31.2<br>(30.2,<br>32.2)       | 26  | 25.4<br>(24.5,<br>26.3)  | 36.2<br>(35.0,<br>37.5) | 43  | 9.9<br>(9.4,1<br>0.5)   | 13.1<br>(12.<br>3,13<br>.8)     | 1.5<br>(1.3,1.<br>7)    | 1.4<br>(1.2,1.<br>7)       | -7     | 7.3<br>(6.8,7.7<br>)    | 7.08<br>(6.6,7.<br>6)    | -3     | 0.3<br>(0.26,0<br>.4)     | 0.14<br>(0.09,0<br>.21)         |        |     |
| <i>No caste</i>                        | (M) 6,466<br>(F) 6,505   | (M) 2,355<br>(F) 5,653   | 31.8<br>(29.4,<br>34.3) | 37.9<br>(34.2,<br>41.6)       | 19  | 23.3<br>(20.9,<br>25.6)  | 35.5<br>(31.6,<br>39.3) | 52  | 10.7<br>(9.3,<br>12.1)  | 13.0<br>(10.<br>9,15<br>.2)     | 1.4<br>(0.8,1.<br>9)    | 0.9<br>(0.36,1<br>.48)     | -36    | 10.3<br>(9.1,11.<br>6)  | 12.8<br>(10.8,1<br>4.8)  | 24     | 0.4<br>(0.2,0.<br>6)      | 0.31<br>(0.03,0<br>.59)         |        |     |
| <b>Education Level<sup>2</sup></b>     |                          |                          |                         |                               |     |                          |                         |     |                         |                                 |                         |                            |        |                         |                          |        |                           |                                 |        |     |
| <i>Post graduate</i>                   | (M) 3,432<br>(F) 1,963   | (M) 2,920<br>(F) 3,526   | 7.6<br>(6.5,<br>8.7)    | 15.05<br>(13.0<br>1,17.<br>1) | 98  | 12.4<br>(10.8,14<br>.1)  | 18.5<br>(16.0,<br>21.1) | 49  | 1.7<br>(1.2,2<br>.2)    | 4.04<br>(3.0,<br>5.1)           | 0.2 (-<br>0.2,<br>0.6)  | 0.02 (-<br>0.007,<br>0.05) | -90    | 1.2<br>(0.45,1.<br>9)   | 0.33<br>(0.14,0<br>.5)   | -73    | 0.2 (-<br>0.17,0.<br>5)   | 0.004<br>(-<br>0.002,<br>0.012) |        |     |
| <i>College</i>                         | (M) 11,340<br>(F) 6,586  | (M) 7,811<br>(F) 9,424   | 11.1<br>(10.2,<br>11.9) | 20.7<br>(19.2,<br>22.1)       | 86  | 14.9<br>(13.9,15<br>.8)  | 23.9<br>(22.3,<br>25.6) | 60  | 3.5<br>(3.1,3<br>.9)    | 6.7<br>(5.8,<br>7.6)            | 0.1 (-<br>0.01,0.<br>2) | 0.11<br>(0.03,<br>0.19)    | 10     | 1.3<br>(0.9,1.6<br>)    | 1.8<br>(1.4,2.<br>2)     | 39     | 0.05 (-<br>0.04,0.<br>14) | 0.04 (-<br>0.017,<br>0.1)       |        |     |
| <i>High school</i>                     | (M) 69,996<br>(F) 46,629 | (M) 26,100<br>(F) 34,338 | 21.2<br>(20.7,2<br>1.8) | 24.7<br>(23.8,<br>.25.5)      | 17  | 23.3<br>(22.7,23<br>.9)  | 33.1<br>(32.0,<br>34.1) | 42  | 7.8<br>(7.5,<br>8.2)    | 9.9<br>(9.3,<br>10.6<br>)       | 0.2<br>(0.17,<br>0.3)   | 0.07<br>(0.04,<br>0.1)     | -65    | 4.2 (3.9,<br>4.6)       | 3.4<br>(3.04,3<br>.7)    | -19    | 0.1<br>(0.06,0<br>.13)    | 0.04(0.<br>02,0.0<br>6)         |        |     |
| <i>Primary school</i>                  | (M) 21,730<br>(F) 20,604 | (M) 12,622<br>(F) 19,451 | 32.7<br>(31.7,3<br>3.6) | 35.6<br>(34.3,<br>36.9)       | 1   | 30.2<br>(29.2,<br>31.2)  | 41.9<br>(40.5,<br>43.4) | 39  | 12.1<br>(11.4,<br>12.7) | 14.8<br>(13.<br>8,<br>15.7<br>) | 0.7<br>(0.5,0.<br>8)    | 0.2<br>(0.13,0<br>.3)      | -71    | 9.0<br>(8.4,9.6<br>)    | 7.4<br>(6.8,8.<br>02)    | -18    | 0.18<br>(0.13,0<br>.24)   | 0.07<br>(0.03,0<br>.11)         |        |     |

|                         |                                  |                                 |                          |                         |    |                         |                              |    |                          |                             |                         |                         |     |                          |                          |     |                         |                           |
|-------------------------|----------------------------------|---------------------------------|--------------------------|-------------------------|----|-------------------------|------------------------------|----|--------------------------|-----------------------------|-------------------------|-------------------------|-----|--------------------------|--------------------------|-----|-------------------------|---------------------------|
| <i>Illiterate</i>       | (M) 24,966<br>(F) 55,104         | (M) 20,302<br>(F) 57,403        | 38.9<br>(37.9,,<br>39.9) | 43.9<br>(42.8,<br>45.2) | 13 | 34.4<br>(33.2,35<br>.5) | 47.1<br>(45.7,<br>48.5)      | 37 | (15.9<br>(15.1,<br>16.6) | 18.9<br>(17.<br>9,19<br>.9) | 2.6<br>(2.4,,2.<br>9)   | 2.3<br>(2.02,2<br>.6)   | -12 | 11.9<br>(11.4,<br>12.6)  | 13.3<br>(12.6,<br>13.0)  | 12  | 0.6<br>(0.53,0<br>.72)  | 0.42<br>(0.33,0<br>.51)   |
| <b>Wealth Quintiles</b> |                                  |                                 |                          |                         |    |                         |                              |    |                          |                             |                         |                         |     |                          |                          |     |                         |                           |
| <i>Richest</i>          | (M) 26,291<br>(F) 26,177         | (M) 13,706<br>(F) 24,837        | 11.9<br>(11.2,<br>12.5)  | 19.9<br>(18.8,<br>21.1) | 63 | 13.7<br>(12.8,14<br>.6) | 20.4<br>(19.0,<br>21.8)      | 49 | 3.3<br>(2.97,<br>3.6)    | 5.8<br>(5.1,<br>6.4)        | 0.2<br>(0.1,0.<br>3)    | 0.14<br>(0.08,0<br>.2)  | -30 | 2.2<br>(1.9,2.5<br>)     | 2.02<br>(1.7,2.<br>3)    | -8  | 0.05<br>(0.01,0<br>.07) | 0.042<br>(0.009,<br>0.07) |
| <i>Richer</i>           | (M) 26,293<br>(F) 26,177         | (M) 13,946<br>(F) 24,837        | 19.3<br>(18.5,<br>20.04) | 25.8<br>(24.6,<br>27.1) | 37 | 19.0<br>(18.1,19<br>.9) | 30.2<br>(28.7,<br>31.7)      | 59 | 5.6<br>(5.2,6<br>.02)    | 9.3<br>(8.4,<br>10.2<br>)   | 0.46<br>(0.37,0<br>.54) | 0.37<br>(0.27,0<br>.47) | -20 | 5.4<br>(4.9,5.9<br>)     | 4.9<br>(4.4,5.<br>4)     | -9  | 0.1<br>(0.07,0<br>.18)  | 0.06<br>(0.02,0<br>.09)   |
| <i>Middle</i>           | (M) 26,294<br>(F) 26,174         | (M) 14,075<br>(F) 24,826        | 25.6<br>(24.7,2<br>6.4)  | 31.4<br>(30.1,<br>32.7) | 25 | 22.9<br>(22.0,23<br>.9) | 34.9<br>(33.4,<br>36.3)      | 52 | 7.6<br>(7.2,8<br>.1)     | 11.5<br>(10.<br>6,12<br>.3) | 1.1<br>(0.9,1.<br>3)    | 0.7<br>(0.6,0.<br>9)    | -36 | 7.8<br>(7.2,8.3<br>)     | 6.9<br>(6.4,7.<br>4)     | -11 | 0.23<br>(0.16,0<br>.3)  | 0.07<br>(0.04,0<br>.11)   |
| <i>Poorer</i>           | (M) 26,293<br>(F) 26,179         | (M) 14,007<br>(F) 24,814        | 30.6<br>(29.7,3<br>1.5)  | 36.5<br>(35.2,<br>37.8) | 21 | 28.9<br>(28.0,29<br>.9) | 39.5<br>(38.0<br>3,40.<br>9) | 37 | 11.6<br>(10.9,<br>12.2)  | 14.5<br>(13.<br>6,15<br>.5) | 1.7<br>(1.5,1.<br>9)    | 1.7<br>(1.4,1.<br>9)    | 0   | 10.9,<br>(10.3,11<br>.6) | 10.5<br>(9.8,12<br>.2)   | -4  | 0.4<br>(0.3,0.<br>5)    | 0.24<br>(0.17,0<br>.31)   |
| <i>Poorest</i>          | (M) 26,293<br>(F) 26,179         | (M) 14,021<br>(F) 24,828        | 35.5<br>(34.4,,<br>36.5) | 40.6,<br>39.3,<br>41.9) | 13 | 36.8<br>(35.7,37<br>.9) | 49.7<br>(48.2,<br>51.2)      | 35 | 16.7<br>(15.9,<br>17.5)  | 19.4<br>(18.<br>4,20<br>.5) | 3.5<br>(3.1,3.<br>9)    | 3.2<br>(2.8,3.<br>7)    | -9  | 14.1<br>(13.3,15<br>.0)  | 17.1<br>(16.03,<br>18.1) | 21  | 0.9<br>(0.7,1.<br>0)    | 0.7<br>(0.52,0<br>.86)    |
| <i>Total</i>            | (M)<br>131,464<br>(F)<br>130,886 | (M)<br>69,755<br>(F)<br>124,142 |                          |                         |    |                         |                              |    |                          |                             |                         |                         |     |                          |                          |     |                         |                           |

<sup>1</sup>Scheduled castes and scheduled tribes are identified by the Government of India as socially and economically backward and needing protection from social injustice and exploitation. Other backward class is a diverse collection of intermediate castes that were considered low in the traditional caste hierarchy but are clearly above scheduled castes. General is thus a default residual group that enjoys higher status in the caste hierarchy.

<sup>2</sup> Post graduate: 15 or more years of education; college: 13-15 years of education; high school: 8-12 years of education; secondary: 5-8 years of education; primary: 0-5 years of education; illiterate: 0 years of education

\*Percentage change (% Δ) numbers have been rounded to the nearest integer.

\*All results for prevalence are survey adjusted and age-standardised. Prevalence results are all in percentages.

1  
2  
3  
4  
5  
6  
7  
8  
9  
10  
11  
12  
13  
14  
15  
16  
17  
18  
19  
20  
21  
22  
23  
24  
25  
26  
27  
28  
29  
30  
31  
32  
33  
34  
35  
36  
37  
38  
39  
40  
41  
42  
43  
44  
45  
46  
47  
48  
49

**Table 2: Pooled Regression Models showing Odds Ratios (95% CIs) for Smoking and Chewing among men and interactions for wealth, education, residence and caste over time.**

| Covariates                             | Smoking             |                                  |                                     |                                              |                                 | Chewing             |                                  |                                     |                                              |                                 |
|----------------------------------------|---------------------|----------------------------------|-------------------------------------|----------------------------------------------|---------------------------------|---------------------|----------------------------------|-------------------------------------|----------------------------------------------|---------------------------------|
|                                        | Model 1: Full Model | Model 2: Interaction with Wealth | Model 3: Interaction with Education | Model 4: Interaction with Living Environment | Model 5: Interaction with Caste | Model 1: Full Model | Model 2: Interaction with Wealth | Model 3: Interaction with Education | Model 4: Interaction with Living Environment | Model 5: Interaction with Caste |
| <b>Wealth Quintiles (Richest)</b>      | 1.00                | 1.00                             | 1.00                                | 1.00                                         | 1.00                            | 1.00                | 1.00                             | 1.00                                | 1.00                                         | 1.00                            |
| Richer                                 | 1.37<br>(1.32,1.43) | 1.51<br>(1.44,1.59)              | 1.37<br>(1.31,1.42)                 | 1.36<br>(1.3,1.41)                           | 1.37<br>(1.31,1.42)             | 1.43<br>(1.38,1.48) | 1.33<br>(1.27,1.4)               | 1.42<br>(1.36,1.47)                 | 1.42<br>(1.36,1.47)                          | 1.41<br>(1.36,1.47)             |
| Middle                                 | 1.71<br>(1.64,1.78) | 1.99<br>(1.89,2.1)               | 1.71<br>(1.64,1.78)                 | 1.68<br>(1.61,1.75)                          | 1.7<br>(1.63,1.77)              | 1.75<br>(1.68,1.82) | 1.63<br>(1.55,1.72)              | 1.73<br>(1.66,1.8)                  | 1.72<br>(1.65,1.8)                           | 1.72<br>(1.65,1.79)             |
| Poorer                                 | 2.06<br>(1.97,2.16) | 2.51<br>(2.37,2.65)              | 2.05<br>(1.96,2.14)                 | 2.02<br>(1.93,2.11)                          | 2.04<br>(1.95,2.14)             | 1.92<br>(1.84,2.01) | 1.77<br>(1.67,1.87)              | 1.89<br>(1.8,1.97)                  | 1.86<br>(1.78,1.95)                          | 1.87<br>(1.79,1.96)             |
| Poorest                                | 2.33<br>(2.22,2.46) | 2.88<br>(2.72,3.06)              | 2.31<br>(2.19,2.43)                 | 2.29<br>(2.18,2.41)                          | 2.3<br>(2.19,2.42)              | 2.1<br>(1.99,2.2)   | 1.93<br>(1.82,2.05)              | 2.03<br>(1.92,2.13)                 | 2.03<br>(1.93,2.13)                          | 2.02<br>(1.93,2.12)             |
| <b>Education (Post graduate)</b>       | 1.00                | 1.00                             | 1.00                                | 1.00                                         | 1.00                            | 1.00                | 1.00                             | 1.00                                | 1.00                                         | 1.00                            |
| College                                | 1.38<br>(1.28,1.49) | 1.41<br>(1.31,1.53)              | 1.34<br>(1.19,1.5)                  | 1.4 (1.29,1.51)                              | 1.4<br>(1.3,1.51)               | 1.26<br>(1.17,1.36) | 1.28<br>(1.19,1.39)              | 1.14<br>(1.02,1.27)                 | 1.29<br>(1.19,1.39)                          | 1.29<br>(1.2,1.39)              |
| High School                            | 1.81<br>(1.69,1.95) | 1.91<br>(1.78,2.05)              | 2.16<br>(1.95,2.4)                  | 1.87<br>(1.74,2.01)                          | 1.87<br>(1.74,2.01)             | 1.53<br>(1.43,1.65) | 1.64<br>(1.53,1.76)              | 1.46<br>(1.33,1.61)                 | 1.65<br>(1.54,1.77)                          | 1.66<br>(1.54,1.78)             |
| Primary                                | 2.73<br>(2.54,2.94) | 2.81<br>(2.61,3.04)              | 3.4<br>(3.05,3.78)                  | 2.77<br>(2.57,2.99)                          | 2.77<br>(2.57,2.99)             | 1.98<br>(1.84,2.13) | 2.04<br>(1.9,2.2)                | 1.84<br>(1.66,2.04)                 | 2.05<br>(1.9,2.21)                           | 2.06<br>(1.91,2.21)             |
| No education                           | 3.18<br>(2.96,3.43) | 3.27<br>(3.03,3.53)              | 4.07<br>(3.66,4.53)                 | 3.19<br>(2.96,4.34)                          | 3.18<br>(2.95,3.42)             | 2.09<br>(1.94,2.26) | 2.06<br>(1.91,2.22)              | 1.93<br>(1.74,2.14)                 | 2.07<br>(1.92,2.23)                          | 2.08<br>(1.93,2.24)             |
| <b>Living Environment (Large city)</b> | 1.00                | 1.00                             | 1.00                                | 1.00                                         | 1.00                            | 1.00                | 1.00                             | 1.00                                | 1.00                                         | 1.00                            |
| Small City                             | 0.77<br>(0.72,0.82) | 0.81<br>(0.76,0.87)              | 0.8<br>(0.74,0.85)                  | 0.82 (0.75,0.9)                              | 0.79<br>(0.74,0.84)             | 0.96<br>(0.89,1.02) | 1.02<br>(0.96,1.09)              | 1.02<br>(0.96,1.09)                 | 1.06<br>(0.97,1.16)                          | 1.03<br>(0.97,1.1)              |
| Town                                   | 0.78<br>(0.74,0.82) | 0.83(0.79,0.88)                  | 0.81(0.77,0.85)                     | 0.88<br>(0.82,0.95)                          | 0.81<br>(0.77,0.85)             | 0.92<br>(0.87,0.97) | 1.01<br>(0.95,1.06)              | 1.01<br>(0.95,1.06)                 | 1.06<br>(0.98,1.15)                          | 1.01<br>(0.96,1.07)             |
| Village                                | 0.68<br>(0.65,0.71) | 0.75<br>(0.71,0.78)              | 0.73<br>(0.7,0.77)                  | 0.87<br>(0.82,0.92)                          | 0.73<br>(0.7,0.76)              | 0.76<br>(0.73,0.79) | 0.92<br>(0.88,0.96)              | 0.92<br>(0.88,0.96)                 | 0.93<br>(0.88,0.99)                          | 0.93<br>(0.88,0.97)             |

|                            |                     |                     |                     |                     |                     |                     |                     |                      |                      |                     |
|----------------------------|---------------------|---------------------|---------------------|---------------------|---------------------|---------------------|---------------------|----------------------|----------------------|---------------------|
| <b>Caste/Tribe (Other)</b> | 1.00                | 1.00                | 1.00                | 1.00                | 1.00                | 1.00                | 1.00                | 1.00                 | 1.00                 | 1.00                |
| SC                         | 1.16<br>(1.12,1.2)  | 1.15<br>(1.11,1.19) | 1.15<br>(1.11,1.18) | 1.15<br>(1.11,1.19) | 1.16<br>(1.11,1.21) | 1.12<br>(1.08,1.15) | 1.1<br>(1.06,1.13)  | 1.1<br>(1.06,1.13)   | 1.1<br>(1.06,1.13)   | 1.1<br>(1.06,1.14)  |
| ST                         | 1.14<br>(1.09,1.2)  | 1.13 (1.08, 1.2)    | 1.14<br>(1.08,1.18) | 1.14 (1.09,1.2)     | 1.15<br>(1.09,1.21) | 3.02<br>(2.88,3.15) | 1.1<br>(1.06,1.15)  | 1.1<br>(1.05,1.15)   | 1.1<br>(1.05,1.15)   | 1.17<br>(1.11,1.24) |
| OBC                        | 1.00<br>(0.98,1.04) | 0.99<br>(0.97,1.02) | 0.99<br>(0.96,1.02) | 0.99<br>(0.97,1.02) | 1.03<br>(0.99,1.07) | 1.05<br>(1.02,1.08) | 1.01<br>(0.97,1.03) | 1.002<br>(0.97,1.03) | 1.003<br>(0.97,1.03) | 1.04<br>(0.99,1.07) |
| No Caste or missing        | 1.06<br>(1.01,1.13) | 1.07<br>(1.01,1.13) | 1.07<br>(1.01,1.13) | 1.08<br>(1.02,1.14) | 1.05<br>(0.98,1.13) | 0.97<br>(0.92,1.03) | 1.02<br>(0.96,1.08) | 1.01<br>(0.96,1.08)  | 1.02<br>(0.96,1.08)  | 0.97<br>(0.9,1.04)  |
| <b>Survey Year (Yr)</b>    |                     | 1.74<br>(1.7,1.88)  | 1.67<br>(1.46,1.91) | 1.49 (1.4,1.58)     | 1.24<br>(1.19,1.3)  |                     | 1.47<br>(1.38,1.56) | 1.34<br>(1.17,1.54)  | 1.69<br>(1.58,1.8)   | 1.72<br>(1.65,1.79) |
| Yr *Richer                 |                     | 0.78<br>(0.73,0.84) |                     |                     |                     |                     | 1.15<br>(1.07,1.24) |                      |                      |                     |
| Yr*Middle                  |                     | 0.68<br>(0.63,0.73) |                     |                     |                     |                     | 1.13<br>(1.05,1.22) |                      |                      |                     |
| Yr *Poorer                 |                     | 0.60<br>(0.56,0.65) |                     |                     |                     |                     | 1.15<br>(1.07,1.24) |                      |                      |                     |
| Yr *Poorest                |                     | 0.58<br>(0.53,0.62) |                     |                     |                     |                     | 1.11 (1.03, 1.2)    |                      |                      |                     |
| Yr *College                |                     |                     | 1.13<br>(0.97,1.32) |                     |                     |                     |                     | 1.27<br>(1.1,1.48)   |                      |                     |
| Yr * High School           |                     |                     | 0.78<br>(0.68,0.89) |                     |                     |                     |                     | 1.28<br>(1.11,1.47)  |                      |                     |
| Yr * Primary               |                     |                     | 0.66<br>(0.57,0.77) |                     |                     |                     |                     | 1.02<br>(0.88,,1.18) |                      |                     |
| Yr * No education          |                     |                     | 0.61<br>(0.53,0.70) |                     |                     |                     |                     | 1.01<br>(0.87,1.17)  |                      |                     |
| Yr *Small City             |                     |                     |                     | 0.99<br>(0.87,1.12) |                     |                     |                     |                      | 0.94<br>(0.82,1.06)  |                     |
| Yr * Town                  |                     |                     |                     | 0.89<br>(0.81,0.98) |                     |                     |                     |                      | 0.9<br>(0.82,0.99)   |                     |
| Yr * Village               |                     |                     |                     | 0.73<br>(0.68,0.79) |                     |                     |                     |                      | 0.98<br>(0.91,1.05)  |                     |
| Yr *SC                     |                     |                     |                     |                     | 0.99<br>(0.92,1.05) |                     |                     |                      |                      | 0.99<br>(0.93,1.06) |
| Yr *ST                     |                     |                     |                     |                     | 0.97<br>(0.9,1.05)  |                     |                     |                      |                      | 0.84<br>(0.78,0.91) |
| Yr*OBC                     |                     |                     |                     |                     | 0.92<br>(0.87,0.97) |                     |                     |                      |                      | 0.92<br>(0.87,0.97) |
| Yr*No Caste                |                     |                     |                     |                     | 1.07<br>(0.94,1.21) |                     |                     |                      |                      | 1.15<br>(1.02,1.29) |

1  
2  
3  
4  
5  
6  
7  
8  
9  
10  
11  
12  
13  
14  
15  
16  
17  
18  
19  
20  
21  
22  
23  
24  
25  
26  
27  
28  
29  
30  
31  
32  
33  
34  
35  
36  
37  
38  
39  
40  
41  
42  
43  
44  
45  
46  
47  
48  
49

| <i>Fixed Part of the Model</i>               |  |                  |                 |                 |                 |  |                  |                  |                  |                  |
|----------------------------------------------|--|------------------|-----------------|-----------------|-----------------|--|------------------|------------------|------------------|------------------|
| Joint Chi Test for Interaction (p-value)     |  | 174.31 (p<0.001) | 13.31 (p=0.009) | 13.44 (p=0.003) | 0.318 (p=0.98)  |  | 15.63 (p=0.003)  | 8.52 (p=0.074)   | 2.6 (p=0.46)     | 1.387 (p=0.85)   |
| <i>Random Part of the Model</i>              |  |                  |                 |                 |                 |  |                  |                  |                  |                  |
| Chi square for Level 3: State (p-value)      |  | 12.82 (p=0.003)  | 12.82 (p=0.003) | 12.82 (p=0.003) | 12.82 (p=0.003) |  | 12.89 (p=0.0003) | 12.89 (p=0.0003) | 12.89 (p=0.0003) | 12.89 (p=0.0003) |
| Chi square for Level 2: Local Area (p-value) |  | 650.41 (p<0.001) | 655.7 (p<0.001) | 654.2 (p<0.001) | 660.7 (p<0.001) |  | 801.6 (p<0.001)  | 802.4 (p<0.001)  | 802.4 (p<0.001)  | 801.7 (p<0.001)  |

\*Models are controlled for age (centered at 29 years), marital status and religion

Peer review only

**Table 3: Pooled Regression Models showing Odds Ratios (95% CIs) for Smoking and Chewing among women and interactions for wealth, education, residence and caste over time.**

| Covariates                             | Smoking                |                                        |                                              |                                                       |                                       | Chewing                |                                        |                                              |                                                       |                                       |
|----------------------------------------|------------------------|----------------------------------------|----------------------------------------------|-------------------------------------------------------|---------------------------------------|------------------------|----------------------------------------|----------------------------------------------|-------------------------------------------------------|---------------------------------------|
|                                        | Model 1:<br>Full Model | Model 2:<br>Interaction<br>with Wealth | Model 3:<br>Interaction<br>with<br>Education | Model 4:<br>Interaction with<br>Living<br>Environment | Model 5:<br>Interaction<br>with Caste | Model 1:<br>Full Model | Model 2:<br>Interaction<br>with Wealth | Model 3:<br>Interaction<br>with<br>Education | Model 4:<br>Interaction with<br>Living<br>Environment | Model 5:<br>Interaction<br>with Caste |
| <b>Wealth Quintiles (Richest)</b>      | 1.00                   | 1.00                                   | 1.00                                         | 1.00                                                  | 1.00                                  | 1.00                   | 1.00                                   | 1.00                                         | 1.00                                                  | 1.00                                  |
| Richer                                 | 1.48<br>(1.28,1.71)    | 1.82<br>(1.49,2.22)                    | 1.48<br>(1.28,1.71)                          | 1.48 (1.28,1.71)                                      | 1.49<br>(1.29,1.72)                   | 1.48<br>(1.41,1.56)    | 1.41<br>(1.32,1.51)                    | 1.48<br>(1.4,1.55)                           | 1.51 (1.43,1.59)                                      | 1.48<br>(1.41,1.56)                   |
| Middle                                 | 1.9<br>(1.64,2.19)     | 2.63<br>(2.17,3.19)                    | 1.87<br>(1.62,2.16)                          | 1.88 (1.62,2.18)                                      | 1.9 (1.64,2.19)                       | 1.75<br>(1.66,1.85)    | 1.58 (1.47,1.7)                        | 1.75<br>(1.65,1.84)                          | 1.81 (1.72,1.92)                                      | 1.76<br>(1.66,1.85)                   |
| Poorer                                 | 2.75<br>(2.37,3.19)    | 3.72<br>(3.07,5.52)                    | 2.8<br>(2.41,3.25)                           | 2.81 (2.42,3.26)                                      | 2.85<br>(2.45,3.30)                   | 2.14<br>(2.02,2.27)    | 1.86<br>(1.72,2.002)                   | 2.13<br>(2.01,2.25)                          | 2.2 (2.07,2.32)                                       | 2.14<br>(2.02,2.27)                   |
| Poorest                                | 3.95<br>(3.39,4.6)     | 4.83<br>(3.97,5.88)                    | 4.03<br>(3.46,4.69)                          | 4.05 (3.47,4.72)                                      | 4.08 (3.5,4.75)                       | 2.67<br>(2.5,2.84)     | 2.14<br>(1.99,2.32)                    | 2.65<br>(2.49,2.82)                          | 2.7 (2.54,2.88)                                       | 2.7 (2.5,2.84)                        |
| <b>Education (Post graduate)</b>       | 1.00                   | 1.00                                   | 1.00                                         | 1.00                                                  | 1.00                                  | 1.00                   | 1.00                                   | 1.00                                         | 1.00                                                  | 1.00                                  |
| College                                | 1.59<br>(0.91,2.8)     | 1.61<br>(0.92,2.82)                    | 0.98<br>(0.37,2.58)                          | 1.58 (0.9,2.78)                                       | 1.57 (0.9,2.75)                       | 1.84<br>(1.55,2.19)    | 1.83<br>(1.54,2.17)                    | 1.1<br>(0.85,1.42)                           | 1.82 (1.53,2.17)                                      | 1.84<br>(1.55,2.19)                   |
| High School                            | 1.78<br>(1.06,2.99)    | 1.67<br>(1.01,,2.82)                   | 1.95<br>(0.83,4.56)                          | 1.62 (0.96,2.72)                                      | 1.61 (0.99,2.7)                       | 2.19<br>(1.86,2.57)    | 2.13<br>(1.82,2.51)                    | 1.47<br>(1.17,1.85)                          | 2.15 (1.82,2.54)                                      | 2.21<br>(1.88,2.6)                    |
| Primary                                | 2.78<br>(1.66,4.68)    | 2.62<br>(1.56,4.41)                    | 3.32<br>(1.42,7.76)                          | 2.54 (1.51,4.29)                                      | 2.52 (1.5,4.24)                       | 2.87<br>(2.44,3.4)     | 2.83 (2.4,3.33)                        | 2.03<br>(1.61,2.56)                          | 2.86 (2.42,3.37)                                      | 2.89<br>(2.45,3.41)                   |
| No education                           | 4.78<br>(2.84,8.04)    | 4.91<br>(2.93,8.23)                    | 6.89<br>(2.53,13.73)                         | 4.72 (2.81,7.93)                                      | 4.66<br>(2.77,7.81)                   | 3.85<br>(3.27,4.53)    | 3.75<br>(3.19,4.42)                    | 2.58<br>(2.04,3.24)                          | 3.8 (3.22,4.48)                                       | 3.85<br>(3.27,4.53)                   |
| <b>Living Environment (Large city)</b> | 1.00                   | 1.00                                   | 1.00                                         | 1.00                                                  | 1.00                                  | 1.00                   | 1.00                                   | 1.00                                         | 1.00                                                  | 1.00                                  |
| Small City                             | 0.91<br>(0.75,1.09)    | 0.98 (0.82,<br>1.17)                   | 1.01<br>(0.84,1.21)                          | 0.78 (0.58,1.04)                                      | 1.004<br>(0.84,1.2)                   | 1.23<br>(1.13,1.32)    | 1.25<br>(1.15,1.35)                    | 1.22<br>(1.13,1.32)                          | 0.97 (0.86,1.1)                                       | 1.2<br>(1.11,1.29)                    |
| Town                                   | 1.19<br>(1.03,1.37)    | 1.2 (1.04,1.38)                        | 1.22<br>(1.05,1.4)                           | 1.31 (1.06,1.62)                                      | 1.23 (1.1,1.41)                       | 1.36<br>(1.27,1.45)    | 1.37<br>(1.29,1.47)                    | 1.36<br>(1.27,1.45)                          | 0.95 (0.86,1.04)                                      | 1.34<br>(1.25,1.43)                   |
| Village                                | 1.4<br>(1.24,1.59)     | 1.28<br>(1.13,1.46)                    | 1.31<br>(1.16,1.49)                          | 1.37 (1.14,1.66)                                      | 1.32<br>(1.16,1.49)                   | 1.07<br>(1.01,1.14)    | 1.09<br>(1.02,1.16)                    | 1.08<br>(1.02,1.15)                          | 0.69 (0.64,0.75)                                      | 1.07<br>(1.005,1.13)                  |
| <b>Caste/Tribe</b>                     | 1.00                   | 1.00                                   | 1.00                                         | 1.00                                                  | 1.00                                  | 1.00                   | 1.00                                   | 1.00                                         | 1.00                                                  | 1.00                                  |

1  
2  
3  
4  
5  
6  
7  
8  
9  
10  
11  
12  
13  
14  
15  
16  
17  
18  
19  
20  
21  
22  
23  
24  
25  
26  
27  
28  
29  
30  
31  
32  
33  
34  
35  
36  
37  
38  
39  
40  
41  
42  
43  
44  
45  
46  
47  
48  
49

|                                 |                     |                      |                     |                     |                     |                     |                     |                     |                       |                     |
|---------------------------------|---------------------|----------------------|---------------------|---------------------|---------------------|---------------------|---------------------|---------------------|-----------------------|---------------------|
| (Other)                         |                     |                      |                     |                     |                     |                     |                     |                     |                       |                     |
| SC                              | 1.5<br>(1.39,1.62)  | 1.55<br>(1.43,1.67)  | 1.54<br>(1.43,1.67) | 1.54 (1.43,1.67)    | 1.4 (1.27,1.55)     | 1.28<br>(1.23,1.33) | 1.28<br>(1.23,1.36) | 1.28<br>(1.23,1.33) | 1.29 (1.24,1.34)      | 1.28<br>(1.22,1.35) |
| ST                              | 2.04<br>(1.86,2.24) | 2.11 (1.92,<br>2.3)  | 2.11<br>(1.93,2.31) | 2.11 (1.93,2.31)    | 1.99<br>(1.79,2.23) | 1.53<br>(1.46,1.6)  | 1.53<br>(1.46,1.61) | 1.53<br>(1.46,1.61) | 1.52 (1.45,1.6)       | 1.48<br>(1.39,1.58) |
| OBC                             | 1.11<br>(1.03,1.2)  | 1.17<br>(1.08,1.26)  | 1.16<br>(1.08,1.26) | 1.16 (1.08,1.25)    | 1.13<br>(1.03,1.24) | 1.03<br>(0.99,1.07) | 1.03<br>(0.99,1.07) | 1.03<br>(0.99,1.07) | 1.03 (0.99,1.07)      | 1.06<br>(1.02,1.12) |
| No Caste or missing             | 0.7<br>(0.6,0.81)   | 0.74<br>(0.64,0.86)  | 0.72<br>(0.62,0.85) | 0.73 (0.62,0.85)    | 1.01 (0.85,1.2)     | 1.02<br>(0.95,1.09) | 1.02<br>(0.96,1.09) | 1.02<br>(0.95,1.09) | 1.01 (0.95,1.08)      | 0.92<br>(0.85,1.01) |
| <b>Survey Year (Yr)</b>         |                     | 1.004<br>(0.98,1.03) | 0.89<br>(0.31,2.56) | 0.67 (0.55,0.83)    | 0.57<br>(0.51,0.63) |                     | 0.81<br>(0.75,0.87) | 0.54<br>(0.4,0.74)  | 0.52 (0.47,0.56)      | 1.02<br>(0.97,1.07) |
| Yr*Richer                       |                     | 0.66 (0.5,0.87)      |                     |                     |                     |                     | 1.09<br>(0.99,1.21) |                     |                       |                     |
| Yr*Middle                       |                     | 0.47<br>(0.36,0.61)  |                     |                     |                     |                     | 1.21 (1.1,1.34)     |                     |                       |                     |
| Yr *Poorer                      |                     | 0.56<br>(0.44,0.72)  |                     |                     |                     |                     | 1.3 (1.18,1.43)     |                     |                       |                     |
| Yr *Poorest                     |                     | 0.71<br>(0.56,0.91)  |                     |                     |                     |                     | 1.5 (1.37,1.64)     |                     |                       |                     |
| Yr *College                     |                     |                      | 1.98<br>(0.6,6.52)  |                     |                     |                     |                     | 2.26<br>(1.6,3.21)  |                       |                     |
| Yr * High School                |                     |                      | 0.77<br>(0.26,2.22) |                     |                     |                     |                     | 1.94<br>(1.41,2.67) |                       |                     |
| Yr * Primary                    |                     |                      | 0.61<br>(0.21,1.75) |                     |                     |                     |                     | 1.74<br>(1.27,2.4)  |                       |                     |
| Yr * No education               |                     |                      | 0.7 (0.24,2.0)      |                     |                     |                     |                     | 1.94<br>(1.41,2.66) |                       |                     |
| Yr*Small City                   |                     |                      |                     | 1.44 (0.99,2.07)    |                     |                     |                     |                     | 1.61 (1.38,1.88)      |                     |
| Yr * Town                       |                     |                      |                     | 0.89 (0.68,1.16)    |                     |                     |                     |                     | 1.94 (1.72,2.19)      |                     |
| Yr * Village                    |                     |                      |                     | 0.92 (0.74,1.15)    |                     |                     |                     |                     | 2.26 (2.06,2.48)      |                     |
| Yr *SC                          |                     |                      |                     |                     | 1.29<br>(1.11,1.51) |                     |                     |                     |                       | 0.99<br>(0.93,1.07) |
| Yr *ST                          |                     |                      |                     |                     | 1.16<br>(0.99,1.36) |                     |                     |                     |                       | 1.07<br>(0.98,1.16) |
| Yr*OBC                          |                     |                      |                     |                     | 1.1 (0.96,1.27)     |                     |                     |                     |                       | 0.95<br>(0.89,1.01) |
| Yr*No Caste                     |                     |                      |                     |                     | 0.45<br>(0.32,0.63) |                     |                     |                     |                       | 1.22<br>(1.07,1.38) |
| <b>Fixed Part of the Model</b>  |                     |                      |                     |                     |                     |                     |                     |                     |                       |                     |
| Overall Chi for Interaction (p- |                     | 19.128<br>(p<0.001)  | 0.041<br>(p=0.99)   | 50.195<br>(p<0.001) | 0.992 (p=0.91)      |                     | 31.96<br>(p<0.0001) | 17.42<br>(p=0.001)  | 157.008<br>(p<0.0001) | 2.665<br>(p=0.615)  |



|                                              |  |                  |                 |                 |                 |  |                   |                  |                   |                   |
|----------------------------------------------|--|------------------|-----------------|-----------------|-----------------|--|-------------------|------------------|-------------------|-------------------|
| value)                                       |  |                  |                 |                 |                 |  |                   |                  |                   |                   |
| <b>Random Part of the Model</b>              |  |                  |                 |                 |                 |  |                   |                  |                   |                   |
| Chi square for Level 3: State (p-value)      |  | 12.91 (p=0.011)  | 12.91 (p=0.011) | 12.91 (p=0.004) | 12.91 (p=0.011) |  | 12.94 (p=0.011)   | 12.94 (p=0.011)  | 12.94 (p=0.004)   | 12.94 (p=0.011)   |
| Chi square for Level 2: Local Area (p-value) |  | 260.98 (p<0.001) | 266.3 (p<0.001) | 264.9 (p<0.001) | 263.5 (p<0.001) |  | 844.91 (p<0.0001) | 839.3 (p<0.0001) | 824.92 (p<0.0001) | 837.64 (p<0.0001) |

\*Models are controlled for age (centered at 29 years), marital status and religion

For peer review only

1  
2  
3  
4  
5  
6  
7  
8  
9  
10  
11  
12  
13  
14  
15  
16  
17  
18  
19  
20  
21  
22  
23  
24  
25  
26  
27  
28  
29  
30  
31  
32  
33  
34  
35  
36  
37  
38  
39  
40  
41  
42  
43  
44  
45  
46  
47  
48  
49

1  
2  
3  
4  
5  
6  
7  
8  
9  
10  
11  
12  
13  
14  
15  
16  
17  
18  
19  
20  
21  
22  
23  
24  
25  
26  
27  
28  
29  
30  
31  
32  
33  
34  
35  
36  
37  
38  
39  
40  
41  
42  
43  
44  
45  
46  
47  
48  
49

For peer review only

1  
2  
3  
4  
5  
6  
7  
8  
9  
10  
11  
12  
13  
14  
15  
16  
17  
18  
19  
20  
21  
22  
23  
24  
25  
26  
27  
28  
29  
30  
31  
32  
33  
34  
35  
36  
37  
38  
39  
40  
41  
42  
43  
44  
45  
46  
47  
48  
49  
50  
51  
52  
53  
54  
55  
56  
57  
58  
59  
60

For peer review only

1  
2  
3  
4  
5  
6  
7  
8  
9  
10  
11  
12  
13  
14  
15  
16  
17  
18  
19  
20  
21  
22  
23  
24  
25  
26  
27  
28  
29  
30  
31  
32  
33  
34  
35  
36  
37  
38  
39  
40  
41  
42  
43  
44  
45  
46  
47  
48  
49

For peer review only

## ACKNOWLEDGEMENTS

We acknowledge the support of Macro International Inc (Washington, DC) for providing access to the surveys.

**Competing Interests:** None

**Financial Disclosures:** None.

**Funding/Support:** There was no specific funding for this study. NB is supported by the Presidential Scholarship at Harvard University. SA is supported by a Wellcome Trust Strategic Award Grant No. Z/041825. CM conducted this work during a Study Abroad Fellowship funded by the Leverhulme Trust. CM is also funded by the Higher Education Funding Council for England and the National Institute for Health Research.

**Contributorship Statement:** SVS and NB conceptualized and planned the study. NB led the data analysis, interpretation and writing of the manuscript. SS, MAS, and SA contributed to data analysis and writing of the manuscript. CJM, and SS contributed to the interpretation and writing of the manuscript. SVS contributed to the interpretation and writing of the manuscript, and provided the overall supervision.

**Data Sharing Statement:** Open source dataset.

**References Cited:**

1. Reddy KS, Prabhakaran D, Jeemon P, et al. "Educational status and cardiovascular risk profile in Indians." *PNAS* 104.41 (2007): 16263-16268.
2. WHO (2008). *WHO Report on the Global Tobacco Epidemic, 2008: The MPOWER package*. Geneva, World Health Organization, 2008.
3. Murray CJL, & Lopez, AD. "Global mortality, disability and the contribution of risk factors: Global Burden of Disease Study." *The Lancet* 349 (1997a): 1436-42.
4. Murray CJL, & Lopez AD. "Alternative projections of mortality and disability by cause 1990-2020: Global Burden of Disease Study." *The Lancet* 349 (1997b): 1498-1504.
5. Rani M, Bonu S, Jha P, et al. "Tobacco use in India: prevalence and predictors of smoking and chewing in a national cross sectional household survey." *Tobacco Control* 12.4 (2003): e4.
6. Subramanian SV, Nandy S, Kelly M, et al. "Patterns and distribution of tobacco consumption in India: cross sectional multilevel evidence from the 1998-9 National Family Health Survey." *BMJ* 328.7443 (2004): 801-6.
7. John RM, Rao RK, Rao MG, et al. *The economics of tobacco and tobacco taxation in India*. Paris: International Union against Tuberculosis and Lung Disease, 2010.
8. IIPS, & ORC Macro. *National Family Health Survey (NFHS-2), 1998-99*. Data. Mumbai, India: IIPS, 2000.
9. IIPS, & ORC Macro. *National Family Health Survey (NFHS-3), 2005-06: India: Vol I*. Data. Mumbai, India: IIPS, 2007.
10. Lopez AD, Collishaw NE, Piha T. "A descriptive model of the cigarette epidemic in developed countries." *Tobacco Control* 3 (1994): 242-247.
11. Thun M, Peto R, Boreham J, et al. "Stages of the cigarette epidemic on entering its second century." *Tobacco Control* 21 (2011): 96-101.
12. Sinha DN, Palipudi KM, Rolle I, et al. (2011). Tobacco use among youth and adults in member countries of South-East Asia region: review of findings from surveys under the Global Tobacco Surveillance System. *Indian J Public Health*. 2011; 55(3): 169-76
13. GOI. (2010). *Global Adult Tobacco Survey. GATS India 2009-10*. Report. Ministry of Health & Family Welfare, Government of India. Available online.
14. Jha P, Jacob B, Gajalakshmi V, et al. (2008). A nationally representative case-control study of smoking and death in India. *N Engl J Med*. 2008;358:1137-47
15. Dikshit R, Gupta PC, Ramasundarahettige C, et al. (2012). Cancer mortality in India: a nationally representative survey. *The Lancet*, Mar 28. Epub. DOI:10.1016/S0140-6736(12)60358-4
16. Critchley JA, Unal B. (2003). Health effects associated with smokeless tobacco: a systematic review. *Thorax* 2003; 58:435-443
17. WHO (2008). *WHO Report on the Global Tobacco Epidemic, 2008: The MPOWER package*. "Gender, Women and the Tobacco Epidemic. Summary and Overview". Geneva, World Health Organization, 2008.
18. Fernandez E, Garcia M, Schiaffino A, et al. "Smoking initiation and cessation by gender and educational level in Catalonia, Spain." (2002).
19. Viswanath K, Ackerson LK, Sorensen G, et al. (2010). Movies and TV influence tobacco use in India: findings from a national survey. *PLoS One*. 2010;5(6):e11365
20. Stigler M, Dhavan P, Van Dusen D, et al. (2010). Westernization and tobacco use among young people in Delhi, India. *Soc Sci Med*. 2010; 71(5): 891-7
21. Shah PB, Pednekar MS, Gupta PC, et al. (2008). The relationship between tobacco advertisements and smoking status of youth in India. *Asian Pac J Cancer Prev*. 2008;9(4):637-42
22. Ebrahim S, . "Surveillance and Monitoring for Chronic Diseases: A Vital Investment." *The National Medical Journal of India*. *Editorial* 22.3 (2011): 129-132.
23. Palipudi KM, Gupta PC, Sinha DN, et al. (2012). Social determinants of health and tobacco use in thirteen low and middle income countries: evidence from Global Adult tobacco Survey. *Plos One*. 2012. 7(3):e33466.

1  
2  
3  
4  
5  
6  
7  
8  
9  
10  
11  
12  
13  
14  
15  
16  
17  
18  
19  
20  
21  
22  
23  
24  
25  
26  
27  
28  
29  
30  
31  
32  
33  
34  
35  
36  
37  
38  
39  
40  
41  
42  
43  
44  
45  
46  
47  
48  
49  
50  
51  
52  
53  
54  
55  
56  
57  
58  
59  
60

**Are socioeconomic disparities in tobacco consumption increasing in India? A repeated cross-sectional multilevel analysis**

Formatted: Font: Not Italic

**Corresponding Author:**

SV Subramanian

Professor of Population Health and Geography Department of Society, Human Development and Health, Harvard School of Public Health

7<sup>th</sup> Floor, Kresge Building, 677 Huntington Ave, Boston MA 02115, USA

Phone: +1 617 432 6299

Fax: +1 617 432 3123

Email: [svsubram@hsph.harvard.edu](mailto:svsubram@hsph.harvard.edu)

**Authors:**

Nandita Bhan<sup>1</sup>

Swati Srivastava<sup>2</sup>

Sutapa Agrawal<sup>3</sup>

Malavika Subramanyam<sup>4</sup>

Christopher Millett<sup>5</sup>

Sakthivel Selvaraj<sup>2</sup>

SV Subramanian<sup>1</sup>

<sup>1</sup> Department of Society, Human Development and Health, Harvard School of Public Health, Harvard University, Boston, USA

<sup>2</sup> Public Health Foundation of India (PHFI), New Delhi, India

<sup>3</sup> South Asia Network for Chronic Diseases (SANCD), New Delhi, India

<sup>4</sup> Center for Integrative Approaches to Health Disparities, School of Public Health, University of Michigan, Michigan, USA

<sup>5</sup> School of Public Health, Imperial College London, London, UK

**Word Count: 287~~13~~ words**

1  
2  
3  
4  
5  
6  
7  
8  
9  
10 **ABSTRACT: (291298 words)**

11 **Objectives:** India bears a significant portion of the global tobacco burden with high  
12 prevalence of ~~tobacco tobacco use among men and women~~. This study examines the  
13 socioeconomic patterning of tobacco use and identifies the changing gender and  
14 socioeconomic dynamics in light of the *Cigarette Epidemic Model*.  
15

16 **Design:** ~~Population based cross sectional surveys, Secondary analyses of second and~~  
17 ~~third National Family Health Survey (NFHS) data NFHS 2 and 3, India.~~

18 **Setting & participants:** ~~Data were analysed from 201,219,131,464 men and~~  
19 ~~255,028,130,886 women over survey rounds. (NFHS 2) and 69,755 men and 124,142~~  
20 ~~women (NFHS 3) ages 15-49 years.~~

21 **Outcomes & methods:** Outcomes included ~~d~~ **smoking** (cigarettes, *bidis* and pipes/cigar),  
22 ~~chewing chewed tobacco (paan masala, gutkha or other chewed forms of tobacco and~~  
23 ~~others)~~ and **dual use**, examined by education, wealth, living environment and caste/~~tribe~~.  
24 Standardized prevalence and percentage change were estimated. Pooled multilevel  
25 models estimated ~~d~~ the effect of socioeconomic covariates on the log odds of tobacco use  
26 by gender, ~~estimating along with~~ fixed and random parameters.

27 **Findings:** Among men (2005-6), ~~SES~~ gradients in smoking ~~by education~~ (~~i~~Illiterate: 44%  
28 vs. ~~p~~Postgraduates: 15%) and chewing (~~i~~Illiterate: 47% vs. ~~p~~Postgraduate: 19%) were  
29 observed. ~~Inverse Similar~~ gradients ~~were also~~ observed by ~~education~~ wealth, living  
30 environment and caste. Chewed tobacco ~~prevalence use among by~~ women showed  
31 inverse SES gradients comparing the illiterate (7.4%) vs. postgraduate (0.33%), and  
32 poorest (17%) vs. richest (2%) quintiles. However, ~~proportional increases in smoking~~  
33 ~~were higher among more educated (postgraduates (98%) vs. high schooling only (17%))~~  
34 ~~and chewing among richer (richest quintile (49%) vs. poorest quintile (35%)).~~ ~~change~~  
35 ~~estimates showed greater percentage rises in smoking and chewing respectively by higher~~  
36 ~~SES groups among men—postgraduates (98%) and richest (49%) compared to those with~~  
37 ~~high schooling only (17%) and poorest (35%).~~ Among women, higher educated showed  
38 larger declines ~~for smoking~~ - 90% (postgraduates) vs. 12% (illiterates). Younger men (15-  
39 24 years) showed increasing tobacco use (Smoking: 123% and Chewing: 112%). Older  
40  
41  
42  
43  
44  
45  
46  
47  
48  
49  
50  
51  
52  
53  
54  
55  
56  
57  
58  
59  
60



women (35-49 years) show higher prevalence of smoking (3.2%) compared to younger 0.3% (15-24 years) 0.3% for smoking.

**Conclusions:** Indian tobacco use patterns show significant diversions from the *Cigarette Epidemic Model*– from gender and socioeconomic perspectives. Separate analysis by type is needed to further understand social determinants of tobacco use in India.

### Article Summary

#### Article Focus

- India bears a significant burden of tobacco consumption, with high prevalence of smoking and chewing among men & women.
- Previous studies have established a unique social and spatial gradient in tobacco use. However, no studies have yet reported estimates for changing patterns in tobacco use prevalence or relative risk over time.
- This study estimates socioeconomic patterns and examines the changing gender and socioeconomic dynamics of tobacco use in light of the *Cigarette Epidemic Model*.

#### Key Messages

- Among men, higher prevalence of smoking and chewing for less educated, poorer, rural and lower caste. Sharp and rising inequalities by survey year, but percentage change shows increases are greater among higher SES groups – higher education, urban, richer populations, previously unreported.
- Low and declining risks of smoking and chewing among women. Higher rates of chewing compared to smoking. Increase in smoking with urbanization for women. Greater declines over time for higher educated women.
- Significant changing trend by wealth, education and living environment in smoking among men and in chewing among women. Increases in smoking prevalence among younger men (15-24 years) and chewing among younger women (15-24 years).

#### Strengths & limitations

- First systematic examination of socioeconomic patterns in tobacco use in India, highlighting SES gradients in use and risks among vulnerable populations.
- Large sample, representative and generalizable surveys providing repeated and comparable estimates over time.
- Limitations: a) cross-sectional data, limiting scope for causal inference, b) lack of data by tobacco type or volume of use, c) data from a reproductive health survey may suffer from social desirability bias.

## INTRODUCTION

Global estimates indicate that one in ten adult deaths can be attributed to tobacco consumption, leading to approximately 5 million global deaths per year[1-4]. Of these, 2.4 million deaths occur in developing countries. India bears a significant portion of this global tobacco burden[3-4]. Consumption of both smoked and smoke-less (chewed and inhaled) forms of tobacco is highly prevalent among men (47%) and women (14%)[5]. However, previous studies have indicated that tobacco use, like other non-communicable disease risk factors, is unequally distributed across different social determinants in India – education, caste and wealth – among both men and women[1,5-7], indicating a distinct ‘economic and spatial distribution’ in tobacco use[6]. No studies have yet systematically examined patterns and changes in the prevalence of tobacco consumption in India by socioeconomic factors over time.

In this study, we aim to provide estimates and inferences on the changing gradient of tobacco consumption in India, analysing prevalence and odds ratio patterns from the National Family Health Surveys[8-9]. We discuss our findings in light of the Cigarette Epidemic Model[10-11] and examine what populations show higher and lower prevalence of tobacco consumption over time.

## METHODS

1  
2  
3  
4  
5  
6  
7  
8 Data ~~were~~ analysed from two rounds of the Indian National Family Health Survey  
9 (NFHS 2 ~~and~~ 3) conducted during 1998-99 and 2005-06 ~~respectively~~. ~~The~~ NFHS is a  
10 nationally representative cross-sectional survey that is collected and managed by the  
11 Indian Institute of Population Sciences (IIPS) in Mumbai, India. These surveys provide  
12 vital sources of information on demographic, health and socioeconomic behaviour of  
13 Indian households. Data from men and women in the age group of 15-49 years ~~were~~  
14 used from both survey rounds to ensure comparability. Data ~~are~~ representative of all  
15 Indian states (except the small Union Territories), hence covering almost 99 per cent of  
16 the country's population. The surveys were collected using multistage cluster random  
17 sampling techniques. Rural and urban areas ~~were~~ sampled separately and a uniform  
18 sample design was followed in each state; states and PSUs are considered as levels.  
19 Individual questionnaires for men and women were used to interview usual residents of  
20 the household or visitors who stayed in the house the night before. Further details on  
21 sample design, including sampling framework and sample implementation, are provided  
22 in the basic survey reports by IIPS [8-9].

23  
24 Outcomes of interest included ~~d~~ **smoking** (cigarettes, *bidis*<sup>1</sup> and pipes/cigar), **chewing**  
25 **tobacco** (*paan masala*<sup>2</sup>, *gutkha*<sup>3</sup> or other chewed forms of tobacco) and **dual use**  
26 (consuming both smoked and ~~chewed~~~~smokeless~~ forms) of tobacco. NFHS-3 provides  
27 details on the different types of smoked and ~~chewed~~~~smokeless~~ tobacco products, but this  
28 information was unavailable in NFHS-2. The main covariates of interest were age,  
29 marital status and education at the individual level, and household wealth, area of  
30 residence (urban/rural), religion and caste/tribe status at the household level (*Variable*  
31 *definitions are provided in Table 1*). Survey-weighted age-standardised prevalence  
32 estimates of smoking, chewing and dual use of tobacco along with percentage change  
33 were calculated. Pooled multi-level models with state, local area and individual as  
34 analytical levels were used to estimate the effect of wealth, education, living environment  
35 and caste on the log odds of smoking and chewing among men and women. Regression  
36 models ~~were~~ adjusted for age, religion and marital status. Survey year was used in the  
37  
38  
39  
40  
41  
42  
43  
44  
45  
46  
47  
48  
49

50 <sup>1</sup> *Bidis* are local inexpensive cigarettes, that are thinner and contain tobacco flakes rolled inside tendu leaves. Bidis are often smoked  
51 by poorer populations.

52 <sup>2</sup> *Paan Masala* is a powdered preparation of betel leaves combined with cured tobacco and/or areca nut, which has stimulating  
53 properties

54 <sup>3</sup> *Gutkha* is a savoury or sweet preparation containing areca nut, tobacco, catechu, paraffin and slaked lime.

interaction terms to estimate a time trend in socioeconomic determinants of tobacco.

Tests for trend included joint tests for significance of fixed parameters and significance tests for random parameters. Model estimates were maximum likelihood-based using the Iterative Generalized Least-Squares (IGLS) algorithm as implemented within the MLwin software programme (version 2.23).

## RESULTS

Data used in this analysis covered 131,464 men and 130,886 women residing in 92,486 households in NFHS-2 and 69,755 men and 124,142 women residing in 109,041 households in NFHS-3, with an overall response rate of 96% for NFHS-2 and 98% for NFHS-3. Prevalence (%) of smoking, chewing and dual use of tobacco over two survey rounds are presented by the three primary markers of socioeconomic status (SES) - education, wealth and caste (Table 1) along with percentage change estimates. Estimates by living environment, marital status, age and religion are presented in the appendix (Web Table 1). Among men, the prevalence of tobacco use (smoking, chewing and dual use) was seen to increase across all socioeconomic groups. For instance, smoking has risen from 35.5% to 40.6% in the fifth (poorest) quintile, 30.6% to 36.5% in the fourth quintile, 25.6 to 31.4% in the middle quintile, 19.3% to 25.8% in the second quintile and 11.9% to 19.9% in the first (richest) quintile (table 1). Chewed tobacco use increased from 34.4% to 47.1% among the illiterate populations, 30.2% to 41.9% among those with primary schooling only, 23.3% to 33.1% among those with high school education, 14.9% to 23.9% among those with college education and 12.4% to 18.5% among those with postgraduate degree. Higher prevalence of tobacco use among men in each survey round was seen for socioeconomically disadvantaged groups – with less educated, lower wealth, living in rural residence areas or lower caste showing an inverse SES gradient; however, greater proportional increases in prevalence over time were seen among higher SES groups. For instance, higher absolute smoking prevalence in NFHS-3 was seen among men in lower wealth quintiles compared to those in higher wealth quintiles (41% for fifth (poorest) quintile and 37% for fourth quintile, compared to 20% in first (richest) quintile and 26% in second quintile); higher percentage increases in smoking were recorded among first (richest) quintile (63%) and second quintile (37%)

1  
2  
3  
4  
5  
6  
7  
8 compared to fourth quintile (21%) and fifth (poorest) quintile (13%). Similar trend was  
9 seen for education with a 98% increase in prevalence among those with postgraduate  
10 education and 13% increase in prevalence among those with no education over the two  
11 survey rounds. Sharper inequalities with higher inter-group differences were  
12 seen for smoking compared to chewing. Prevalence of chewing among men in the richest quintile  
13 and with postgraduate education each increased by 49%, while that for the poorest  
14 increased by 35% and for those with no education increased by 37%.

15 Socioeconomic patterns for tobacco use among women differed distinctly. Overall  
16 prevalence rates of tobacco use among women were significantly lower than men. In  
17 2005-06, prevalence of smoking and chewing among women with no education was 2.3%  
18 and 13.3% respectively, while the same for men was 43.9% and 47.1% respectively  
19 (Table 1). Women in most SES categories showed a declining trend for tobacco use, and  
20 only scheduled caste women and those with college education showed small increases in  
21 smoking and chewing. Higher and more consistent declines in prevalence were  
22 seen for education, compared to wealth and caste/tribe status. For instance, women with  
23 postgraduate education noted a 90% decrease in smoking and a 73% decrease in chewing  
24 (table 1). Women in the first (richest) quintile showed a decline of 30% for smoking and  
25 8% for chewing (Table 1). Results by area of residence (Web Table 1) showed  
26 an increase in risks for tobacco use with urbanization among both men and women, except  
27 in the prevalence of chewed tobacco among women. Figures 1-2 show the percentage  
28 change in smoking and chewing by education and wealth for men and women reflecting  
29 findings from table 1.

30 Tables 2-3 present results from pooled multilevel models showing odds ratios for  
31 smoking and chewing by education, wealth, living environment and caste, along with  
32 interactions with survey year. Gradients in odds ratios (95% CI) are seen by all four  
33 markers of SES among men and women for smoking and chewing with sharper  
34 inequalities seen for education and wealth, compared to other markers. Controlling for  
35 wealth, caste and living environment and compared to those with postgraduate education,  
36 the odds ratio of smoking for men with no education: 3.18 (95% CI: 2.96,3.43), with  
37 primary education: 2.73 (95% CI: 2.54,2.94), with high school education: 1.81 (95% CI:  
38  
39  
40  
41  
42  
43  
44  
45  
46  
47  
48  
49  
50  
51  
52  
53  
54  
55  
56  
57  
58  
59  
60

1  
2  
3  
4  
5  
6  
7  
8 1.69,1.85) and with college education: 1.38 (95% CI: 1.28,1.49). Controlling for  
9 education, caste and living environment and compared to the first (richest) quintile, odds  
10 ratio for chewing in the second quintile: 1.43 (95% CI: 1.38,1.48), middle quintile 1.75  
11 (95% CI: 1.68,1.82), fourth quintile: 1.92 (95% CI: 1.84,2.01) and fifth (poorest) quintile:  
12 2.1 (95% CI: 1.99,2.2). Interaction terms in the two tables provide effect estimates for  
13 change over the two survey rounds. Among men, significant parameters for interaction  
14 terms for smoking are seen by wealth, education (except college educated) and living  
15 environment (except small city); and for chewing by wealth, higher education and by  
16 residence in towns. The joint test for interaction of fixed terms is significant for smoking  
17 by wealth (Joint test: 174.31,  $p < 0.001$ ), education (Joint test: 13.31,  $p = 0.009$ ) and living  
18 environment (Joint test: 13.44,  $p = 0.003$ ) and for chewing by wealth (Joint Test:  
19 15.63,  $p = 0.003$ ), representing robust change over time. Chi-square values for random  
20 parameters are significant both at state (Smoking  $\chi^2$ : 12.82,  $p = 0.0003$  and Chewing  
21  $\chi^2$ : 12.89,  $p = 0.0003$ ) and local area (Smoking  $\chi^2$ : 650.41,  $p < 0.0001$  and Chewing  
22  $\chi^2$ : 801.4,  $p < 0.0001$ ) level showing variation at both levels.  
23  
24  
25  
26  
27  
28  
29  
30

31 Among women, controlling for education, caste and living environment and compared to  
32 those in the first (richest) quintile, the odds ratio of smoking in second quintile: 1.48  
33 (95% CI: 1.28,1.71), middle quintile: 1.9 (95% CI: 1.64,2.2), fourth quintile: 2.75 (95% CI:  
34 2.37,3.19) and fifth (poorest) quintile: 3.95 (95% CI: 3.39,4.6). Controlling for wealth,  
35 caste and living environment and compared to those with postgraduate education, odds  
36 ratio of chewing among women with college education: 1.84 (95% CI: 1.55,2.19), high  
37 school education: 2.19 (95% CI: 1.86,2.57), primary schooling: 2.87 (95% CI: 2.44,3.4)  
38 and no education: 3.85 (95% CI: 3.27,4.53). Significant odds ratios for interaction terms  
39 are seen for smoking by wealth (Joint test: 19.128,  $p < 0.0001$ ) and for chewing by wealth  
40 (Joint Test: 31.96,  $p < 0.0001$ ), education (Joint test: 17.42,  $p < 0.0001$ ) and living  
41 environment (Joint test: 157.008,  $p < 0.0001$ ). Chi-square values for random parameters are  
42 significant for both state (Smoking  $\chi^2$ : 12.91,  $p = 0.0004$  and Chewing  $\chi^2$ : 12.94,  
43  $p = 0.011$ ) and local area (Smoking  $\chi^2$ : 264,  $p < 0.0001$  and Chewing  $\chi^2$ : 839,  
44  $p < 0.0001$ ), showing variation at both levels. Figure 3 presents adjusted probability  
45  
46  
47  
48  
49  
50  
51  
52  
53  
54  
55  
56  
57  
58  
59  
60

1  
2  
3  
4  
5  
6  
7  
8  
9  
10  
11  
12  
13  
14  
15  
16  
17  
18  
19  
20  
21  
22  
23  
24  
25  
26  
27  
28  
29  
30  
31  
32  
33  
34  
35  
36  
37  
38  
39  
40  
41  
42  
43  
44  
45  
46  
47  
48  
49  
50  
51  
52  
53  
54  
55  
56  
57  
58  
59  
60

estimates for smoking and chewing among men and women by wealth and education from multilevel models, which show findings similar to prevalence estimates.

## DISCUSSION

In 1994, Lopez et al.[10] proposed the four-stage *Cigarette Epidemic Model* discussing transitions in smoking prevalence, consumption amount and mortality in developed countries. As per the model in stage I, male smoking prevalence is comparatively low and rising (<20%) and female smoking prevalence does not exceed 5% due to sociocultural factors. In stage II, tobacco prevalence among men starts to rise rapidly and peaks around 50-80% with female smoking increasing at a lagged pace behind men. In stage III, prevalence rates for smoking among men start to fall, with both male and female smoking converging. Increases are seen for smoking rates among younger compared to older populations. In stage IV, prevalence of smoking begins to decline for both men and women. Mortality attributable to smoking rises to about one-third for all men, with much lower mortality rates seen among women. This model was developed based on empirical data from developed countries and has not been tested in developing countries. However, in 2011 Thun et al.[11] proposed modifications to the model potentially relevant for developing countries and were the first to note that smoking patterns by gender in developing countries distinctly differ from patterns noted in developed countries. India shows a high and complex burden of tobacco consumption, as also reported in tobacco surveillance studies[2,12-13]. This paper uses empirical evidence to show that India is currently between stages II and III of the Cigarette Epidemic model on the basis of estimates of smoking for men, but distinctly differs from the model on the patterns seen for women.

Overall, several dissimilarities are noted in the Indian experience from this model. **First**, India's unique tobacco experience comprises a 'double burden' of smoked **and** chewed tobacco consumption. Patterns for smoking and chewing seem to follow trajectories that differ by education, living environment and wealth. Further, within smoking, differences potentially exist by SES in the consumption of cigarettes from *bidis*, which most data are

1  
2  
3  
4  
5  
6  
7  
8  
9  
10  
11  
12  
13  
14  
15  
16  
17  
18  
19  
20  
21  
22  
23  
24  
25  
26  
27  
28  
29  
30  
31  
32  
33  
34  
35  
36  
37  
38  
39  
40  
41  
42  
43  
44  
45  
46  
47  
48  
49  
50  
51  
52  
53  
54  
55  
56  
57  
58  
59  
60

unable to distinguish. The quantity and quality of these products may differentially determine the mortality burden attributable to tobacco use in India[14-16]. Assessment of the disease, mortality and cost burden of the tobacco epidemic needs to account for this complexity[14-15].

*Second*, socioeconomic and sociocultural dynamics play profound roles in impacting tobacco use in India. Differences in tobacco consumption are seen by major SES markers such as wealth, education, living environment and caste. Findings from this analysis indicate a dichotomy between **higher absolute prevalence** by lower caste, wealth and education levels; but **higher relative change in prevalence** over time by higher caste, wealth and education levels. *No previous study has reported this finding for India.* Urbanization seems to be playing an increasing role in impacting tobacco use for men and women. Further analyses by type and amount of tobacco consumed are needed to systematically understand these patterns.

*Third*, social gradients in tobacco use (overall and by type of tobacco) in India distinctly differ by gender. Despite women's empowerment, large-scale increases in women's smoking as predicted by the Cigarette Epidemic Model are yet to be seen in India[10-11, 17-18]. Aggregate estimates show that women are far behind men in prevalence rates for smoking; and smoking and chewing rates among women, barring a few groups, seem to be declining. The reasons for this could be several. **First**, that Indian sociocultural realities and lower acceptability of smoking among women leads to delays in age of initiation of smoking and higher rates among older compared to younger women (Web Table 1). Women's smoking has been linked to their empowerment, but this may be confined to urban areas and it is possible that on average, smoking continues to remain a social taboo among women. Representation of smoking in the media may also explain the gender patterns in the use of tobacco; smoking has been projected as an expression of masculinity among men and has moralistic connotations for women[19-21]. **Second**, an economic perspective explaining the lower smoking rates among women in India may attribute this statistic to women's unequal participation in the labor market and limited access to personal disposable income. Higher smoking among women in cities may partly



1  
2  
3  
4  
5  
6  
7  
8 indicate greater uptake of smoking by employed women. **Third**, given that data for this  
9 analysis comes from a reproductive health survey, it is possible that results for women are  
10 an underestimate. Web table 1 indicates that older (above 35 years of age) women are  
11 more likely use tobacco. However, patterns in this analysis match findings from other  
12 tobacco studies such as the GATS in India (IIPS)[5-6], providing a counter to this  
13 argument.  
14  
15  
16

17  
18 *Finally*, evidence on the socioeconomic gradient in tobacco use in India needs to be  
19 linked to its implications for tobacco-related mortality and morbidity[14-15]. Dikshit et  
20 al.[15] provide the first estimates of cancer mortality in India, attributing a major  
21 component of age-standardized cancer mortality from lung and oral cancers to high rates  
22 of tobacco use in India. Analyses stratifying cancer morbidity and mortality in India by  
23 SES have not yet been attempted, and the lack of reliable surveillance data for chronic  
24 diseases prevents ~~an~~ exhaustive assessments of the impact of tobacco use on Indian  
25 current and future chronic disease burden[22].  
26  
27  
28  
29  
30

31 This study provides a systematic examination of the socioeconomic patterns in tobacco  
32 use in India over time. Data in this analysis comes from the NFHS, which is a large,  
33 representative and generalizable survey, providing a comparative picture of tobacco  
34 patterns over time. The limitations of this analysis are the following. First, the  
35 surveys data are cross-sectional, hence limiting scope for causal inference. NFHS does  
36 not provide detailed data by type or volume of tobacco. Finally, NFHS is a reproductive  
37 health survey where women in the ages of 15-49 years are sampled. Men are sampled in  
38 the households of the female sample. This introduces the potential for two downward  
39 biases. The first pertains to *social desirability bias* particularly related to underestimation  
40 of smoking patterns in women's childbearing years. Second, since the sample of men is  
41 conditional on the households from which women were sampled, the pool of men  
42 sampled may not be representative. Despite these caveats, NFHS (and in general the  
43 demographic and health surveys) has proven to be representative and generalizable, and  
44 continues to be used in a number of studies related to tobacco[5-6]. In addition, our  
45 findings are consistent with estimates from studies using other surveys assessing the  
46  
47  
48  
49  
50  
51  
52  
53  
54

1  
2  
3  
4  
5  
6  
7  
8 burden of tobacco and its drivers in India[2,23]. Tobacco burden in the 'productive'  
9 populations (14-50 years) not only represents the current burden of tobacco but may  
10 predict future morbidity.  
11

12  
13  
14 We present empirical evidence that India is experiencing a unique economic and social  
15 transition in tobacco consumption, quite distinct from the experience of developed  
16 countries that is likely to manifest in a number of morbidities[2,14-15]. In order to ensure  
17 policy effectiveness to prevent and reduce the exposure to tobacco, there is a need to  
18 systematically monitor and examine the social inequities in tobacco use over time and  
19 channel interventions to the social groups that are most vulnerable to these inequalities.  
20  
21  
22  
23  
24  
25  
26  
27  
28  
29  
30  
31  
32  
33  
34  
35  
36  
37  
38  
39

#### 40 **TABLES, FIGURES AND REFERENCES**

41  
42  
43  
44  
45  
46  
47  
48  
49  
50  
51  
52  
53  
54  
55  
56  
57  
58  
59  
60

Table 1: Prevalence (%) of tobacco smoking, chewing and dual use (smoking and chewing) by wealth, education and caste/tribe status among men and women in the National Family Health Surveys 1998-99 and 2005-6

|                                        | Sample Population        |                          | MEN                  |                       |     |                       |                      |     | FEMALE               |                      |                    |                      |        |                      |                       |        |                      |                       |        |
|----------------------------------------|--------------------------|--------------------------|----------------------|-----------------------|-----|-----------------------|----------------------|-----|----------------------|----------------------|--------------------|----------------------|--------|----------------------|-----------------------|--------|----------------------|-----------------------|--------|
|                                        |                          |                          | SMOKE                |                       |     | CHEW                  |                      |     | DUAL                 |                      |                    | SMOKE                |        |                      | CHEW                  |        |                      | DUAL                  |        |
|                                        |                          |                          | 1998-9               | 2005-6                | % Δ | 1998-9                | 2005-6               | % Δ | 1998-9               | 2005-6               | % Δ                | 1998-9               | 2005-6 | % Δ                  | 1998-9                | 2005-6 | % Δ                  | 1998-9                | 2005-6 |
| <b>Caste/ tribe status<sup>†</sup></b> |                          |                          |                      |                       |     |                       |                      |     |                      |                      |                    |                      |        |                      |                       |        |                      |                       |        |
| <i>General</i>                         | (M) 50,939<br>(F) 50,526 | (M) 21,850<br>(F) 41,844 | 22.2<br>(21.4, 22.9) | 28.8<br>(27.7, 29.9)  | 30  | 22.2<br>(21.4, 23.02) | 33.2<br>(31.8, 34.5) | 50  | 7.4<br>(6.9, 7.8)    | 10.8<br>(10.0, 11.5) | 1.0<br>(0.9, 1.1)  | 0.8<br>(0.55, 1.0)   | -20    | 6.6 (6.1, 7.1)       | 7.24<br>(6.6, 7.85)   | 10     | 0.24<br>(0.17, 0.3)  | 0.2<br>(0.11, 0.27)   |        |
| <i>SC</i>                              | (M) 21,491<br>(F) 21,045 | (M) 11,953<br>(F) 20,566 | 31.5<br>(30.5, 32.5) | 39.3<br>(37.8, 40.9)  | 25  | 27.8<br>(26.6, 29.1)  | 40.5<br>(38.8, 42.1) | 46  | 12.1<br>(11.4, 12.8) | 15.8<br>(14.7, 16.9) | 2.3<br>(1.9, 2.8)  | 2.4<br>(2.05, 2.8)   | 4      | 10.9<br>(10.1, 11.8) | 12.1<br>(11.2, 12.9)  | 11     | 0.5<br>(0.4, 0.7)    | 0.4<br>(0.3, 0.6)     |        |
| <i>ST</i>                              | (M) 16,187<br>(F) 16,520 | (M) 8,453<br>(F) 16,518  | 30.6<br>(28.8, 32.3) | 36.6<br>(34.1, 39.1)  | 20  | 38.6<br>(36.9, 40.4)  | 52.6<br>(49.9, 55.3) | 36  | 14.5<br>(13.3, 15.6) | 18.6<br>(16.7, 20.4) | 3.0<br>(2.5, 3.6)  | 2.7<br>(2.04, 3.4)   | -10    | 18.5<br>(17.0, 20.1) | 25.08<br>(22.8, 27.4) | 36     | 1.0<br>(0.7, 1.2)    | 0.9<br>(0.6, 1.3)     |        |
| <i>OBC</i>                             | (M) 36,381<br>(F) 36,290 | (M) 25,144<br>(F) 29,561 | 24.7<br>(23.9, 25.5) | 31.2<br>(30.2, 32.2)  | 26  | 25.4<br>(24.5, 26.3)  | 36.2<br>(35.0, 37.5) | 43  | 9.9<br>(9.4, 10.5)   | 13.1<br>(12.3, 13.8) | 1.5<br>(1.3, 1.7)  | 1.4<br>(1.2, 1.7)    | -7     | 7.3<br>(6.8, 7.7)    | 7.08<br>(6.6, 7.6)    | -3     | 0.3<br>(0.26, 0.4)   | 0.14<br>(0.09, 0.21)  |        |
| <i>No caste</i>                        | (M) 6,466<br>(F) 6,505   | (M) 2,355<br>(F) 5,653   | 31.8<br>(29.4, 34.3) | 37.9<br>(34.2, 41.6)  | 19  | 23.3<br>(20.9, 25.6)  | 35.5<br>(31.6, 39.3) | 52  | 10.7<br>(9.3, 12.1)  | 13.0<br>(10.9, 15.2) | 1.4<br>(0.8, 1.9)  | 0.9<br>(0.36, 1.48)  | -36    | 10.3<br>(9.1, 11.6)  | 12.8<br>(10.8, 14.8)  | 24     | 0.4<br>(0.2, 0.6)    | 0.31<br>(0.03, 0.59)  |        |
| <b>Education Level<sup>†</sup></b>     |                          |                          |                      |                       |     |                       |                      |     |                      |                      |                    |                      |        |                      |                       |        |                      |                       |        |
| <i>Post graduate</i>                   | (M) 3,432<br>(F) 1,963   | (M) 2,920<br>(F) 3,526   | 7.6<br>(6.5, 8.7)    | 15.05<br>(13.0, 17.1) | 98  | 12.4<br>(10.8, 14.1)  | 18.5<br>(16.0, 21.1) | 49  | 1.7<br>(1.2, 2.2)    | 4.04<br>(3.0, 5.1)   | 0.2 (-0.2, 0.6)    | 0.02 (-0.007, 0.05)  | -90    | 1.2<br>(0.45, 1.9)   | 0.33<br>(0.14, 0.5)   | -73    | 0.2 (-0.17, 0.5)     | 0.004 (-0.002, 0.012) |        |
| <i>College</i>                         | (M) 11,340<br>(F) 6,586  | (M) 7,811<br>(F) 9,424   | 11.1<br>(10.2, 11.9) | 20.7<br>(19.2, 22.1)  | 86  | 14.9<br>(13.9, 15.8)  | 23.9<br>(22.3, 25.6) | 60  | 3.5<br>(3.1, 3.9)    | 6.7<br>(5.8, 7.6)    | 0.1 (-0.01, 0.2)   | 0.11<br>(0.03, 0.19) | 10     | 1.3<br>(0.9, 1.6)    | 1.8<br>(1.4, 2.2)     | 39     | 0.05 (-0.04, 0.14)   | 0.04 (-0.017, 0.1)    |        |
| <i>High school</i>                     | (M) 69,996<br>(F) 46,629 | (M) 26,100<br>(F) 34,338 | 21.2<br>(20.7, 21.8) | 24.7<br>(23.8, 25.5)  | 17  | 23.3<br>(22.7, 23.9)  | 33.1<br>(32.0, 34.1) | 42  | 7.8<br>(7.5, 8.2)    | 9.9<br>(9.3, 10.6)   | 0.2<br>(0.17, 0.3) | 0.07<br>(0.04, 0.1)  | -65    | 4.2 (3.9, 4.6)       | 3.4<br>(3.04, 3.7)    | -19    | 0.1<br>(0.06, 0.13)  | 0.04 (0.02, 0.06)     |        |
| <i>Primary school</i>                  | (M) 21,730<br>(F) 20,604 | (M) 12,622<br>(F) 19,451 | 32.7<br>(31.7, 33.6) | 35.6<br>(34.3, 36.9)  | 1   | 30.2<br>(29.2, 31.2)  | 41.9<br>(40.5, 43.4) | 39  | 12.1<br>(11.4, 12.7) | 14.8<br>(13.8, 15.7) | 0.7<br>(0.5, 0.8)  | 0.2<br>(0.13, 0.3)   | -71    | 9.0<br>(8.4, 9.6)    | 7.4<br>(6.8, 8.02)    | -18    | 0.18<br>(0.13, 0.24) | 0.07<br>(0.03, 0.11)  |        |

1  
2  
3  
4  
5  
6  
7  
8  
9  
10  
11  
12  
13  
14  
15  
16  
17  
18  
19  
20  
21  
22  
23  
24  
25  
26  
27  
28  
29  
30  
31  
32  
33  
34  
35  
36  
37  
38  
39  
40  
41  
42  
43  
44  
45  
46  
47  
48  
49

|                         |                                  |                                 |                          |                         |    |                         |                              |    |                          |                             |                         |                         |     |                          |                          |     |                         |                           |
|-------------------------|----------------------------------|---------------------------------|--------------------------|-------------------------|----|-------------------------|------------------------------|----|--------------------------|-----------------------------|-------------------------|-------------------------|-----|--------------------------|--------------------------|-----|-------------------------|---------------------------|
| <i>Illiterate</i>       | (M) 24,966<br>(F) 55,104         | (M) 20,302<br>(F) 57,403        | 38.9<br>(37.9,,<br>39.9) | 43.9<br>(42.8,<br>45.2) | 13 | 34.4<br>(33.2,35<br>.5) | 47.1<br>(45.7,<br>48.5)      | 37 | (15.9<br>(15.1,<br>16.6) | 18.9<br>(17.<br>9,19<br>.9) | 2.6<br>(2.4,,2.<br>9)   | 2.3<br>(2.02,2<br>.6)   | -12 | 11.9<br>(11.4,<br>12.6)  | 13.3<br>(12.6,<br>13.0)  | 12  | 0.6<br>(0.53,0<br>.72)  | 0.42<br>(0.33,0<br>.51)   |
| <b>Wealth Quintiles</b> |                                  |                                 |                          |                         |    |                         |                              |    |                          |                             |                         |                         |     |                          |                          |     |                         |                           |
| <i>Richest</i>          | (M) 26,291<br>(F) 26,177         | (M) 13,706<br>(F) 24,837        | 11.9<br>(11.2,<br>12.5)  | 19.9<br>(18.8,<br>21.1) | 63 | 13.7<br>(12.8,14<br>.6) | 20.4<br>(19.0,<br>21.8)      | 49 | 3.3<br>(2.97,<br>3.6)    | 5.8<br>(5.1,<br>6.4)        | 0.2<br>(0.1,0.<br>3)    | 0.14<br>(0.08,0<br>.2)  | -30 | 2.2<br>(1.9,2.5<br>)     | 2.02<br>(1.7,2.<br>3)    | -8  | 0.05<br>(0.01,0<br>.07) | 0.042<br>(0.009,<br>0.07) |
| <i>Richer</i>           | (M) 26,293<br>(F) 26,177         | (M) 13,946<br>(F) 24,837        | 19.3<br>(18.5,<br>20.04) | 25.8<br>(24.6,<br>27.1) | 37 | 19.0<br>(18.1,19<br>.9) | 30.2<br>(28.7,<br>31.7)      | 59 | 5.6<br>(5.2,6<br>.02)    | 9.3<br>(8.4,<br>10.2<br>)   | 0.46<br>(0.37,0<br>.54) | 0.37<br>(0.27,0<br>.47) | -20 | 5.4<br>(4.9,5.9<br>)     | 4.9<br>(4.4,5.<br>4)     | -9  | 0.1<br>(0.07,0<br>.18)  | 0.06<br>(0.02,0<br>.09)   |
| <i>Middle</i>           | (M) 26,294<br>(F) 26,174         | (M) 14,075<br>(F) 24,826        | 25.6<br>(24.7,2<br>6.4)  | 31.4<br>(30.1,<br>32.7) | 25 | 22.9<br>(22.0,23<br>.9) | 34.9<br>(33.4,<br>36.3)      | 52 | 7.6<br>(7.2,8<br>.1)     | 11.5<br>(10.<br>6,12<br>.3) | 1.1<br>(0.9,1.<br>3)    | 0.7<br>(0.6,0.<br>9)    | -36 | 7.8<br>(7.2,8.3<br>)     | 6.9<br>(6.4,7.<br>4)     | -11 | 0.23<br>(0.16,0<br>.3)  | 0.07<br>(0.04,0<br>.11)   |
| <i>Poorer</i>           | (M) 26,293<br>(F) 26,179         | (M) 14,007<br>(F) 24,814        | 30.6<br>(29.7,3<br>1.5)  | 36.5<br>(35.2,<br>37.8) | 21 | 28.9<br>(28.0,29<br>.9) | 39.5<br>(38.0<br>3,40.<br>9) | 37 | 11.6<br>(10.9,<br>12.2)  | 14.5<br>(13.<br>6,15<br>.5) | 1.7<br>(1.5,1.<br>9)    | 1.7<br>(1.4,1.<br>9)    | 0   | 10.9,<br>(10.3,11<br>.6) | 10.5<br>(9.8,12<br>.2)   | -4  | 0.4<br>(0.3,0.<br>5)    | 0.24<br>(0.17,0<br>.31)   |
| <i>Poorest</i>          | (M) 26,293<br>(F) 26,179         | (M) 14,021<br>(F) 24,828        | 35.5<br>(34.4,,<br>36.5) | 40.6,<br>39.3,<br>41.9) | 13 | 36.8<br>(35.7,37<br>.9) | 49.7<br>(48.2,<br>51.2)      | 35 | 16.7<br>(15.9,<br>17.5)  | 19.4<br>(18.<br>4,20<br>.5) | 3.5<br>(3.1,3.<br>7)    | 3.2<br>(2.8,3.<br>7)    | -9  | 14.1<br>(13.3,15<br>.0)  | 17.1<br>(16.03,<br>18.1) | 21  | 0.9<br>(0.7,1.<br>0)    | 0.7<br>(0.52,0<br>.86)    |
| <i>Total</i>            | (M)<br>131,464<br>(F)<br>130,886 | (M)<br>69,755<br>(F)<br>124,142 |                          |                         |    |                         |                              |    |                          |                             |                         |                         |     |                          |                          |     |                         |                           |

<sup>1</sup>Scheduled castes and scheduled tribes are identified by the Government of India as socially and economically backward and needing protection from social injustice and exploitation. Other backward class is a diverse collection of intermediate castes that were considered low in the traditional caste hierarchy but are clearly above scheduled castes. General is thus a default residual group that enjoys higher status in the caste hierarchy.

<sup>2</sup> Post graduate:15 or more years of education; college: 13-15 years of education; high school: 8-12 years of education; secondary: 5-8 years of education; primary: 0-5 years of education; illiterate: 0 years of education

\*Percentage change (% Δ) numbers have been rounded to the nearest integer.

\*All results for prevalence are survey adjusted and age-standardised. Prevalence results are all in percentages.

**Table 2: Pooled Regression Models showing Odds Ratios (95% CIs) for Smoking and Chewing among men and interactions for wealth, education, residence and caste over time.**

| Covariates                             | Smoking             |                                  |                                     |                                              |                                 | Chewing             |                                  |                                     |                                              |                                 |
|----------------------------------------|---------------------|----------------------------------|-------------------------------------|----------------------------------------------|---------------------------------|---------------------|----------------------------------|-------------------------------------|----------------------------------------------|---------------------------------|
|                                        | Model 1: Full Model | Model 2: Interaction with Wealth | Model 3: Interaction with Education | Model 4: Interaction with Living Environment | Model 5: Interaction with Caste | Model 1: Full Model | Model 2: Interaction with Wealth | Model 3: Interaction with Education | Model 4: Interaction with Living Environment | Model 5: Interaction with Caste |
| <b>Wealth Quintiles (Richest)</b>      | 1.00                | 1.00                             | 1.00                                | 1.00                                         | 1.00                            | 1.00                | 1.00                             | 1.00                                | 1.00                                         | 1.00                            |
| Richer                                 | 1.37<br>(1.32,1.43) | 1.51<br>(1.44,1.59)              | 1.37<br>(1.31,1.42)                 | 1.36<br>(1.3,1.41)                           | 1.37<br>(1.31,1.42)             | 1.43<br>(1.38,1.48) | 1.33<br>(1.27,1.4)               | 1.42<br>(1.36,1.47)                 | 1.42<br>(1.36,1.47)                          | 1.41<br>(1.36,1.47)             |
| Middle                                 | 1.71<br>(1.64,1.78) | 1.99<br>(1.89,2.1)               | 1.71<br>(1.64,1.78)                 | 1.68<br>(1.61,1.75)                          | 1.7<br>(1.63,1.77)              | 1.75<br>(1.68,1.82) | 1.63<br>(1.55,1.72)              | 1.73<br>(1.66,1.8)                  | 1.72<br>(1.65,1.8)                           | 1.72<br>(1.65,1.79)             |
| Poorer                                 | 2.06<br>(1.97,2.16) | 2.51<br>(2.37,2.65)              | 2.05<br>(1.96,2.14)                 | 2.02<br>(1.93,2.11)                          | 2.04<br>(1.95,2.14)             | 1.92<br>(1.84,2.01) | 1.77<br>(1.67,1.87)              | 1.89<br>(1.8,1.97)                  | 1.86<br>(1.78,1.95)                          | 1.87<br>(1.79,1.96)             |
| Poorest                                | 2.33<br>(2.22,2.46) | 2.88<br>(2.72,3.06)              | 2.31<br>(2.19,2.43)                 | 2.29<br>(2.18,2.41)                          | 2.3<br>(2.19,2.42)              | 2.1<br>(1.99,2.2)   | 1.93<br>(1.82,2.05)              | 2.03<br>(1.92,2.13)                 | 2.03<br>(1.932.13)                           | 2.02<br>(1.93,2.12)             |
| <b>Education (Post graduate)</b>       | 1.00                | 1.00                             | 1.00                                | 1.00                                         | 1.00                            | 1.00                | 1.00                             | 1.00                                | 1.00                                         | 1.00                            |
| College                                | 1.38<br>(1.28,1.49) | 1.41<br>(1.31,1.53)              | 1.34<br>(1.19,1.5)                  | 1.4 (1.29,1.51)                              | 1.4<br>(1.3,1.51)               | 1.26<br>(1.17,1.36) | 1.28<br>(1.19,1.39)              | 1.14<br>(1.02,1.27)                 | 1.29<br>(1.19,1.39)                          | 1.29<br>(1.2,1.39)              |
| High School                            | 1.81<br>(1.69,1.95) | 1.91<br>(1.78,2.05)              | 2.16<br>(1.95,2.4)                  | 1.87<br>(1.74,2.01)                          | 1.87<br>(1.74,2.01)             | 1.53<br>(1.43,1.65) | 1.64<br>(1.53,1.76)              | 1.46<br>(1.33,1.61)                 | 1.65<br>(1.54,1.77)                          | 1.66<br>(1.54,1.78)             |
| Primary                                | 2.73<br>(2.54,2.94) | 2.81<br>(2.61,3.04)              | 3.4<br>(3.05,3.78)                  | 2.77<br>(2.57,2.99)                          | 2.77<br>(2.57,2.99)             | 1.98<br>(1.84,2.13) | 2.04<br>(1.9,2.2)                | 1.84<br>(1.66,2.04)                 | 2.05<br>(1.9,2.21)                           | 2.06<br>(1.91,2.21)             |
| No education                           | 3.18<br>(2.96,3.43) | 3.27<br>(3.03,3.53)              | 4.07<br>(3.66,4.53)                 | 3.19<br>(2.96,4.34)                          | 3.18<br>(2.95,3.42)             | 2.09<br>(1.94,2.26) | 2.06<br>(1.91,2.22)              | 1.93<br>(1.74,2.14)                 | 2.07<br>(1.92,2.23)                          | 2.08<br>(1.93,2.24)             |
| <b>Living Environment (Large city)</b> | 1.00                | 1.00                             | 1.00                                | 1.00                                         | 1.00                            | 1.00                | 1.00                             | 1.00                                | 1.00                                         | 1.00                            |
| Small City                             | 0.77<br>(0.72,0.82) | 0.81<br>(0.76,0.87)              | 0.8<br>(0.74,0.85)                  | 0.82 (0.75,0.9)                              | 0.79<br>(0.74,0.84)             | 0.96<br>(0.89,1.02) | 1.02<br>(0.96,1.09)              | 1.02<br>(0.96,1.09)                 | 1.06<br>(0.97,1.16)                          | 1.03<br>(0.97,1.1)              |
| Town                                   | 0.78<br>(0.74,0.82) | 0.83(0.79,0.88)                  | 0.81(0.77,0.85)                     | 0.88<br>(0.82,0.95)                          | 0.81<br>(0.77,0.85)             | 0.92<br>(0.87,0.97) | 1.01<br>(0.95,1.06)              | 1.01<br>(0.95,1.06)                 | 1.06<br>(0.98,1.15)                          | 1.01<br>(0.96,1.07)             |
| Village                                | 0.68<br>(0.65,0.71) | 0.75<br>(0.71,0.78)              | 0.73<br>(0.7,0.77)                  | 0.87<br>(0.82,0.92)                          | 0.73<br>(0.7,0.76)              | 0.76<br>(0.73,0.79) | 0.92<br>(0.88,0.96)              | 0.92<br>(0.88,0.96)                 | 0.93<br>(0.88,0.99)                          | 0.93<br>(0.88,0.97)             |

1  
2  
3  
4  
5  
6  
7  
8  
9  
10  
11  
12  
13  
14  
15  
16  
17  
18  
19  
20  
21  
22  
23  
24  
25  
26  
27  
28  
29  
30  
31  
32  
33  
34  
35  
36  
37  
38  
39  
40  
41  
42  
43  
44  
45  
46  
47  
48  
49

|                            |                     |                     |                     |                     |                     |                     |                     |                      |                      |                     |
|----------------------------|---------------------|---------------------|---------------------|---------------------|---------------------|---------------------|---------------------|----------------------|----------------------|---------------------|
| <b>Caste/Tribe (Other)</b> | 1.00                | 1.00                | 1.00                | 1.00                | 1.00                | 1.00                | 1.00                | 1.00                 | 1.00                 | 1.00                |
| SC                         | 1.16<br>(1.12,1.2)  | 1.15<br>(1.11,1.19) | 1.15<br>(1.11,1.18) | 1.15<br>(1.11,1.19) | 1.16<br>(1.11,1.21) | 1.12<br>(1.08,1.15) | 1.1<br>(1.06,1.13)  | 1.1<br>(1.06,1.13)   | 1.1<br>(1.06,1.13)   | 1.1<br>(1.06,1.14)  |
| ST                         | 1.14<br>(1.09,1.2)  | 1.13 (1.08,<br>1.2) | 1.14<br>(1.08,1.18) | 1.14 (1.09,1.2)     | 1.15<br>(1.09,1.21) | 3.02<br>(2.88,3.15) | 1.1<br>(1.06,1.15)  | 1.1<br>(1.05,1.15)   | 1.1<br>(1.05,1.15)   | 1.17<br>(1.11,1.24) |
| OBC                        | 1.00<br>(0.98,1.04) | 0.99<br>(0.97,1.02) | 0.99<br>(0.96,1.02) | 0.99<br>(0.97,1.02) | 1.03<br>(0.99,1.07) | 1.05<br>(1.02,1.08) | 1.01<br>(0.97,1.03) | 1.002<br>(0.97,1.03) | 1.003<br>(0.97,1.03) | 1.04<br>(0.99,1.07) |
| No Caste or missing        | 1.06<br>(1.01,1.13) | 1.07<br>(1.01,1.13) | 1.07<br>(1.01,1.13) | 1.08<br>(1.02,1.14) | 1.05<br>(0.98,1.13) | 0.97<br>(0.92,1.03) | 1.02<br>(0.96,1.08) | 1.01<br>(0.96,1.08)  | 1.02<br>(0.96,1.08)  | 0.97<br>(0.9,1.04)  |
| <b>Survey Year (Yr)</b>    |                     | 1.74<br>(1.7,1.88)  | 1.67<br>(1.46,1.91) | 1.49 (1.4,1.58)     | 1.24<br>(1.19,1.3)  |                     | 1.47<br>(1.38,1.56) | 1.34<br>(1.17,1.54)  | 1.69<br>(1.58,1.8)   | 1.72<br>(1.65,1.79) |
| Yr *Richer                 |                     | 0.78<br>(0.73,0.84) |                     |                     |                     |                     | 1.15<br>(1.07,1.24) |                      |                      |                     |
| Yr*Middle                  |                     | 0.68<br>(0.63,0.73) |                     |                     |                     |                     | 1.13<br>(1.05,1.22) |                      |                      |                     |
| Yr *Poorer                 |                     | 0.60<br>(0.56,0.65) |                     |                     |                     |                     | 1.15<br>(1.07,1.24) |                      |                      |                     |
| Yr *Poorest                |                     | 0.58<br>(0.53,0.62) |                     |                     |                     |                     | 1.11 (1.03,<br>1.2) |                      |                      |                     |
| Yr *College                |                     |                     | 1.13<br>(0.97,1.32) |                     |                     |                     |                     | 1.27<br>(1.1,1.48)   |                      |                     |
| Yr * High School           |                     |                     | 0.78<br>(0.68,0.89) |                     |                     |                     |                     | 1.28<br>(1.11,1.47)  |                      |                     |
| Yr * Primary               |                     |                     | 0.66<br>(0.57,0.77) |                     |                     |                     |                     | 1.02<br>(0.88,,1.18) |                      |                     |
| Yr * No education          |                     |                     | 0.61<br>(0.53,0.70) |                     |                     |                     |                     | 1.01<br>(0.87,1.17)  |                      |                     |
| Yr *Small City             |                     |                     |                     | 0.99<br>(0.87,1.12) |                     |                     |                     |                      | 0.94<br>(0.82,1.06)  |                     |
| Yr * Town                  |                     |                     |                     | 0.89<br>(0.81,0.98) |                     |                     |                     |                      | 0.9<br>(0.82,0.99)   |                     |
| Yr * Village               |                     |                     |                     | 0.73<br>(0.68,0.79) |                     |                     |                     |                      | 0.98<br>(0.91,1.05)  |                     |
| Yr *SC                     |                     |                     |                     |                     | 0.99<br>(0.92,1.05) |                     |                     |                      |                      | 0.99<br>(0.93,1.06) |
| Yr *ST                     |                     |                     |                     |                     | 0.97<br>(0.9,1.05)  |                     |                     |                      |                      | 0.84<br>(0.78,0.91) |
| Yr*OBC                     |                     |                     |                     |                     | 0.92<br>(0.87,0.97) |                     |                     |                      |                      | 0.92<br>(0.87,0.97) |
| Yr*No Caste                |                     |                     |                     |                     | 1.07<br>(0.94,1.21) |                     |                     |                      |                      | 1.15<br>(1.02,1.29) |

1  
2  
3  
4  
5  
6  
7  
8  
9  
10  
11  
12  
13  
14  
15  
16  
17  
18  
19  
20  
21  
22  
23  
24  
25  
26  
27  
28  
29  
30  
31  
32  
33  
34  
35  
36  
37  
38  
39  
40  
41  
42  
43  
44  
45  
46  
47  
48  
49

| <i>Fixed Part of the Model</i>               |  |                  |                 |                 |                 |  |                  |                  |                  |                  |
|----------------------------------------------|--|------------------|-----------------|-----------------|-----------------|--|------------------|------------------|------------------|------------------|
| Joint Chi Test for Interaction (p-value)     |  | 174.31 (p<0.001) | 13.31 (p=0.009) | 13.44 (p=0.003) | 0.318 (p=0.98)  |  | 15.63 (p=0.003)  | 8.52 (p=0.074)   | 2.6 (p=0.46)     | 1.387 (p=0.85)   |
| <i>Random Part of the Model</i>              |  |                  |                 |                 |                 |  |                  |                  |                  |                  |
| Chi square for Level 3: State (p-value)      |  | 12.82 (p=0.003)  | 12.82 (p=0.003) | 12.82 (p=0.003) | 12.82 (p=0.003) |  | 12.89 (p=0.0003) | 12.89 (p=0.0003) | 12.89 (p=0.0003) | 12.89 (p=0.0003) |
| Chi square for Level 2: Local Area (p-value) |  | 650.41 (p<0.001) | 655.7 (p<0.001) | 654.2 (p<0.001) | 660.7 (p<0.001) |  | 801.6 (p<0.001)  | 802.4 (p<0.001)  | 802.4 (p<0.001)  | 801.7 (p<0.001)  |

\*Models are controlled for age (centered at 29 years), marital status and religion

1  
2  
3  
4  
5  
6  
7  
8  
9  
10  
11  
12  
13  
14  
15  
16  
17  
18  
19  
20  
21  
22  
23  
24  
25  
26  
27  
28  
29  
30  
31  
32  
33  
34  
35  
36  
37  
38  
39  
40  
41  
42  
43  
44  
45  
46  
47  
48  
49

**Table 3: Pooled Regression Models showing Odds Ratios (95% CIs) for Smoking and Chewing among women and interactions for wealth, education, residence and caste over time.**

| Covariates                             | Smoking             |                                  |                                     |                                              |                                 | Chewing             |                                  |                                     |                                              |                                 |
|----------------------------------------|---------------------|----------------------------------|-------------------------------------|----------------------------------------------|---------------------------------|---------------------|----------------------------------|-------------------------------------|----------------------------------------------|---------------------------------|
|                                        | Model 1: Full Model | Model 2: Interaction with Wealth | Model 3: Interaction with Education | Model 4: Interaction with Living Environment | Model 5: Interaction with Caste | Model 1: Full Model | Model 2: Interaction with Wealth | Model 3: Interaction with Education | Model 4: Interaction with Living Environment | Model 5: Interaction with Caste |
| <b>Wealth Quintiles (Richest)</b>      | 1.00                | 1.00                             | 1.00                                | 1.00                                         | 1.00                            | 1.00                | 1.00                             | 1.00                                | 1.00                                         | 1.00                            |
| Richer                                 | 1.48 (1.28,1.71)    | 1.82 (1.49,2.22)                 | 1.48 (1.28,1.71)                    | 1.48 (1.28,1.71)                             | 1.49 (1.29,1.72)                | 1.48 (1.41,1.56)    | 1.41 (1.32,1.51)                 | 1.48 (1.4,1.55)                     | 1.51 (1.43,1.59)                             | 1.48 (1.41,1.56)                |
| Middle                                 | 1.9 (1.64,2.19)     | 2.63 (2.17,3.19)                 | 1.87 (1.62,2.16)                    | 1.88 (1.62,2.18)                             | 1.9 (1.64,2.19)                 | 1.75 (1.66,1.85)    | 1.58 (1.47,1.7)                  | 1.75 (1.65,1.84)                    | 1.81 (1.72,1.92)                             | 1.76 (1.66,1.85)                |
| Poorer                                 | 2.75 (2.37,3.19)    | 3.72 (3.07,5.52)                 | 2.8 (2.41,3.25)                     | 2.81 (2.42,3.26)                             | 2.85 (2.45,3.30)                | 2.14 (2.02,2.27)    | 1.86 (1.72,2.002)                | 2.13 (2.01,2.25)                    | 2.2 (2.07,2.32)                              | 2.14 (2.02,2.27)                |
| Poorest                                | 3.95 (3.39,4.6)     | 4.83 (3.97,5.88)                 | 4.03 (3.46,4.69)                    | 4.05 (3.47,4.72)                             | 4.08 (3.5,4.75)                 | 2.67 (2.5,2.84)     | 2.14 (1.99,2.32)                 | 2.65 (2.49,2.82)                    | 2.7 (2.54,2.88)                              | 2.7 (2.5,2.84)                  |
| <b>Education (Post graduate)</b>       | 1.00                | 1.00                             | 1.00                                | 1.00                                         | 1.00                            | 1.00                | 1.00                             | 1.00                                | 1.00                                         | 1.00                            |
| College                                | 1.59 (0.91,2.8)     | 1.61 (0.92,2.82)                 | 0.98 (0.37,2.58)                    | 1.58 (0.9,2.78)                              | 1.57 (0.9,2.75)                 | 1.84 (1.55,2.19)    | 1.83 (1.54,2.17)                 | 1.1 (0.85,1.42)                     | 1.82 (1.53,2.17)                             | 1.84 (1.55,2.19)                |
| High School                            | 1.78 (1.06,2.99)    | 1.67 (1.01,,2.82)                | 1.95 (0.83,4.56)                    | 1.62 (0.96,2.72)                             | 1.61 (0.99,2.7)                 | 2.19 (1.86,2.57)    | 2.13 (1.82,2.51)                 | 1.47 (1.17,1.85)                    | 2.15 (1.82,2.54)                             | 2.21 (1.88,2.6)                 |
| Primary                                | 2.78 (1.66,4.68)    | 2.62 (1.56,4.41)                 | 3.32 (1.42,7.76)                    | 2.54 (1.51,4.29)                             | 2.52 (1.5,4.24)                 | 2.87 (2.44,3.4)     | 2.83 (2.4,3.33)                  | 2.03 (1.61,2.56)                    | 2.86 (2.42,3.37)                             | 2.89 (2.45,3.41)                |
| No education                           | 4.78 (2.84,8.04)    | 4.91 (2.93,8.23)                 | 6.89 (2.53,13.73)                   | 4.72 (2.81,7.93)                             | 4.66 (2.77,7.81)                | 3.85 (3.27,4.53)    | 3.75 (3.19,4.42)                 | 2.58 (2.04,3.24)                    | 3.8 (3.22,4.48)                              | 3.85 (3.27,4.53)                |
| <b>Living Environment (Large city)</b> | 1.00                | 1.00                             | 1.00                                | 1.00                                         | 1.00                            | 1.00                | 1.00                             | 1.00                                | 1.00                                         | 1.00                            |
| Small City                             | 0.91 (0.75,1.09)    | 0.98 (0.82,1.17)                 | 1.01 (0.84,1.21)                    | 0.78 (0.58,1.04)                             | 1.004 (0.84,1.2)                | 1.23 (1.13,1.32)    | 1.25 (1.15,1.35)                 | 1.22 (1.13,1.32)                    | 0.97 (0.86,1.1)                              | 1.2 (1.11,1.29)                 |
| Town                                   | 1.19 (1.03,1.37)    | 1.2 (1.04,1.38)                  | 1.22 (1.05,1.4)                     | 1.31 (1.06,1.62)                             | 1.23 (1.1,1.41)                 | 1.36 (1.27,1.45)    | 1.37 (1.29,1.47)                 | 1.36 (1.27,1.45)                    | 0.95 (0.86,1.04)                             | 1.34 (1.25,1.43)                |
| Village                                | 1.4 (1.24,1.59)     | 1.28 (1.13,1.46)                 | 1.31 (1.16,1.49)                    | 1.37 (1.14,1.66)                             | 1.32 (1.16,1.49)                | 1.07 (1.01,1.14)    | 1.09 (1.02,1.16)                 | 1.08 (1.02,1.15)                    | 0.69 (0.64,0.75)                             | 1.07 (1.005,1.13)               |
| <b>Caste/Tribe</b>                     | 1.00                | 1.00                             | 1.00                                | 1.00                                         | 1.00                            | 1.00                | 1.00                             | 1.00                                | 1.00                                         | 1.00                            |



|                                    |                     |                      |                     |                     |                     |                     |                     |                     |                       |                     |
|------------------------------------|---------------------|----------------------|---------------------|---------------------|---------------------|---------------------|---------------------|---------------------|-----------------------|---------------------|
| (Other)                            |                     |                      |                     |                     |                     |                     |                     |                     |                       |                     |
| SC                                 | 1.5<br>(1.39,1.62)  | 1.55<br>(1.43,1.67)  | 1.54<br>(1.43,1.67) | 1.54 (1.43,1.67)    | 1.4 (1.27,1.55)     | 1.28<br>(1.23,1.33) | 1.28<br>(1.23,1.36) | 1.28<br>(1.23,1.33) | 1.29 (1.24,1.34)      | 1.28<br>(1.22,1.35) |
| ST                                 | 2.04<br>(1.86,2.24) | 2.11 (1.92,<br>2.3)  | 2.11<br>(1.93,2.31) | 2.11 (1.93,2.31)    | 1.99<br>(1.79,2.23) | 1.53<br>(1.46,1.6)  | 1.53<br>(1.46,1.61) | 1.53<br>(1.46,1.61) | 1.52 (1.45,1.6)       | 1.48<br>(1.39,1.58) |
| OBC                                | 1.11<br>(1.03,1.2)  | 1.17<br>(1.08,1.26)  | 1.16<br>(1.08,1.26) | 1.16 (1.08,1.25)    | 1.13<br>(1.03,1.24) | 1.03<br>(0.99,1.07) | 1.03<br>(0.99,1.07) | 1.03<br>(0.99,1.07) | 1.03 (0.99,1.07)      | 1.06<br>(1.02,1.12) |
| No Caste or<br>missing             | 0.7<br>(0.6,0.81)   | 0.74<br>(0.64,0.86)  | 0.72<br>(0.62,0.85) | 0.73 (0.62,0.85)    | 1.01 (0.85,1.2)     | 1.02<br>(0.95,1.09) | 1.02<br>(0.96,1.09) | 1.02<br>(0.95,1.09) | 1.01 (0.95,1.08)      | 0.92<br>(0.85,1.01) |
| <b>Survey Year (Yr)</b>            |                     | 1.004<br>(0.98,1.03) | 0.89<br>(0.31,2.56) | 0.67 (0.55,0.83)    | 0.57<br>(0.51,0.63) |                     | 0.81<br>(0.75,0.87) | 0.54<br>(0.4,0.74)  | 0.52 (0.47,0.56)      | 1.02<br>(0.97,1.07) |
| Yr*Richer                          |                     | 0.66 (0.5,0.87)      |                     |                     |                     |                     | 1.09<br>(0.99,1.21) |                     |                       |                     |
| Yr*Middle                          |                     | 0.47<br>(0.36,0.61)  |                     |                     |                     |                     | 1.21 (1.1,1.34)     |                     |                       |                     |
| Yr *Poorer                         |                     | 0.56<br>(0.44,0.72)  |                     |                     |                     |                     | 1.3 (1.18,1.43)     |                     |                       |                     |
| Yr *Poorest                        |                     | 0.71<br>(0.56,0.91)  |                     |                     |                     |                     | 1.5 (1.37,1.64)     |                     |                       |                     |
| Yr *College                        |                     |                      | 1.98<br>(0.6,6.52)  |                     |                     |                     |                     | 2.26<br>(1.6,3.21)  |                       |                     |
| Yr * High School                   |                     |                      | 0.77<br>(0.26,2.22) |                     |                     |                     |                     | 1.94<br>(1.41,2.67) |                       |                     |
| Yr * Primary                       |                     |                      | 0.61<br>(0.21,1.75) |                     |                     |                     |                     | 1.74<br>(1.27,2.4)  |                       |                     |
| Yr * No<br>education               |                     |                      | 0.7 (0.24,2.0)      |                     |                     |                     |                     | 1.94<br>(1.41,2.66) |                       |                     |
| Yr*Small City                      |                     |                      |                     | 1.44 (0.99,2.07)    |                     |                     |                     |                     | 1.61 (1.38,1.88)      |                     |
| Yr * Town                          |                     |                      |                     | 0.89 (0.68,1.16)    |                     |                     |                     |                     | 1.94 (1.72,2.19)      |                     |
| Yr * Village                       |                     |                      |                     | 0.92 (0.74,1.15)    |                     |                     |                     |                     | 2.26 (2.06,2.48)      |                     |
| Yr *SC                             |                     |                      |                     |                     | 1.29<br>(1.11,1.51) |                     |                     |                     |                       | 0.99<br>(0.93,1.07) |
| Yr *ST                             |                     |                      |                     |                     | 1.16<br>(0.99,1.36) |                     |                     |                     |                       | 1.07<br>(0.98,1.16) |
| Yr*OBC                             |                     |                      |                     |                     | 1.1 (0.96,1.27)     |                     |                     |                     |                       | 0.95<br>(0.89,1.01) |
| Yr*No Caste                        |                     |                      |                     |                     | 0.45<br>(0.32,0.63) |                     |                     |                     |                       | 1.22<br>(1.07,1.38) |
| <b>Fixed Part of the Model</b>     |                     |                      |                     |                     |                     |                     |                     |                     |                       |                     |
| Overall Chi for<br>Interaction (p- |                     | 19.128<br>(p<0.001)  | 0.041<br>(p=0.99)   | 50.195<br>(p<0.001) | 0.992 (p=0.91)      |                     | 31.96<br>(p<0.0001) | 17.42<br>(p=0.001)  | 157.008<br>(p<0.0001) | 2.665<br>(p=0.615)  |

1  
2  
3  
4  
5  
6  
7  
8  
9  
10  
11  
12  
13  
14  
15  
16  
17  
18  
19  
20  
21  
22  
23  
24  
25  
26  
27  
28  
29  
30  
31  
32  
33  
34  
35  
36  
37  
38  
39  
40  
41  
42  
43  
44  
45  
46  
47  
48  
49

|                                              |  |                  |                 |                 |                 |  |                   |                  |                   |                   |
|----------------------------------------------|--|------------------|-----------------|-----------------|-----------------|--|-------------------|------------------|-------------------|-------------------|
| value)                                       |  |                  |                 |                 |                 |  |                   |                  |                   |                   |
| <b>Random Part of the Model</b>              |  |                  |                 |                 |                 |  |                   |                  |                   |                   |
| Chi square for Level 3: State (p-value)      |  | 12.91 (p=0.011)  | 12.91 (p=0.011) | 12.91 (p=0.004) | 12.91 (p=0.011) |  | 12.94 (p=0.011)   | 12.94 (p=0.011)  | 12.94 (p=0.004)   | 12.94 (p=0.011)   |
| Chi square for Level 2: Local Area (p-value) |  | 260.98 (p<0.001) | 266.3 (p<0.001) | 264.9 (p<0.001) | 263.5 (p<0.001) |  | 844.91 (p<0.0001) | 839.3 (p<0.0001) | 824.92 (p<0.0001) | 837.64 (p<0.0001) |

\*Models are controlled for age (centered at 29 years), marital status and religion

peer review only

Web Table 1: Prevalence (%) of tobacco smoking, chewing and dual use (smoking and chewing) by living environment, age, religion and marital status among men and women in the National Family Health Surveys 1998-99 and 2005-6

|                                      | Sample Population        |                          | MEN                  |                      |         |                      |                      |         |                      |                      |                      | FEMALE               |        |                      |                      |        |                       |                      |        |     |
|--------------------------------------|--------------------------|--------------------------|----------------------|----------------------|---------|----------------------|----------------------|---------|----------------------|----------------------|----------------------|----------------------|--------|----------------------|----------------------|--------|-----------------------|----------------------|--------|-----|
|                                      |                          |                          | SMOKE                |                      |         | CHEW                 |                      |         | DUAL                 |                      |                      | SMOKE                |        |                      | CHEW                 |        |                       | DUAL                 |        |     |
|                                      |                          |                          | 1998-9               | 2005-6               | % Δ     | 1998-9               | 2005-6               | % Δ     | 1998-9               | 2005-6               | % Δ                  | 1998-9               | 2005-6 | % Δ                  | 1998-9               | 2005-6 | % Δ                   | 1998-9               | 2005-6 | % Δ |
| <b>Area of residence<sup>1</sup></b> |                          |                          |                      |                      |         |                      |                      |         |                      |                      |                      |                      |        |                      |                      |        |                       |                      |        |     |
| <i>Large city</i>                    | (M) 17,640<br>(F) 16,081 | (M) 19,092<br>(F) 26,272 | 17.7<br>(16.6, 18.9) | 27.2<br>(25.7, 28.8) | 54      | 19.1<br>(17.4, 21.1) | 30.3<br>(28.2, 32.5) | 59      | 6.05<br>(5.4, 6.8)   | 10.2<br>(9.2, 11.3)  | 0.3(0.2, 0.4)        | 0.4<br>(0.3, 0.6)    | 33     | 5.8<br>(4.9, 6.9)    | 4.9<br>(4.1, 5.9)    | -16    | 0.09<br>(0.06, 0.14)  | 0.055<br>(0.03, 0.1) |        |     |
| <i>Small city</i>                    | (M) 8,957<br>(F) 8,573   | (M) 4,723<br>(F) 9,318   | 18.3<br>(16.4, 0.2)  | 28.8<br>(26.5, 31.2) | 57      | 19.4<br>(17.1, 22.0) | 34.2<br>(31.1, 37.4) | 76      | 5.8<br>(4.95, 6.8)   | 10.9<br>(9.6, 12.5)  | 0.3<br>(0.2, 0.5)    | 0.5<br>(0.35, 0.7)   | 67     | 5.9<br>(4.8, 7.1)    | 6.6<br>(5.5, 8.1)    | 12     | 0.06<br>(0.03, 0.14)  | 0.09<br>(0.04, 0.2)  |        |     |
| <i>Town</i>                          | (M) 18,837<br>(F) 18,803 | (M) 12,078<br>(F) 21,256 | 19.9<br>(18.6, 21.2) | 30.3<br>(28.4, 32.2) | 52      | 20.6<br>(18.7, 22.5) | 31.1<br>(28.6, 33.7) | 51      | 6.3<br>(5.6, 7.1)    | 10.5<br>(9.4, 11.7)  | 0.6<br>(0.5, 0.8)    | 0.6<br>(0.4, 0.8)    | 0      | 6.7<br>(5.8, 7.8)    | 7.2<br>(6.1, 8.4)    | 8      | 0.2<br>(0.15, 0.3)    | 0.1<br>(0.07, 0.2)   |        |     |
| <i>Village</i>                       | (M) 86,030<br>(F) 87,429 | (M) 33,862<br>(F) 67,296 | 28.9<br>(28.2, 9.6)  | 35.2<br>(34.2, 36.2) | 22      | 28.2<br>(27.4, 28.9) | 40.9<br>(39.8, 41.9) | 45      | 11.4<br>(10.9, 11.8) | 15.0<br>(14.3, 15.7) | 2.04<br>(1.85, 2.24) | 1.98<br>(1.75, 2.24) | -3     | 9.8<br>(9.3, 10.3)   | 11.3<br>(10.6, 11.9) | 15     | 0.5<br>(0.43, 0.6)    | 0.4<br>(0.3, 0.5)    |        |     |
| <b>Age-groups</b>                    |                          |                          |                      |                      |         |                      |                      |         |                      |                      |                      |                      |        |                      |                      |        |                       |                      |        |     |
| <i>15-24</i>                         | (M) 50,266<br>(F) 52,299 | (M) 25,511<br>(F) 46,688 | 8.6<br>(8.2, 9.1)    | 19.2<br>(18.4, 20.1) | 12<br>3 | 14.3<br>(13.7, 14.9) | 30.3<br>(29.2, 31.4) | 11<br>2 | 3.5<br>(3.3, 3.8)    | 9.45<br>(8.9, 10.1)  | 0.4<br>(0.31, 0.45)  | 0.3<br>(0.21, 0.36)  | -25    | 3.1<br>(2.8, 3.3)    | 4.4<br>(3.9, 4.7)    | 42     | 0.098<br>(0.07, 0.14) | 0.08<br>(0.05, 0.13) |        |     |
| <i>25-34</i>                         | (M) 38,650<br>(F) 40,764 | (M) 20,794<br>(F) 38,441 | 29.1<br>(28.3, 29.9) | 36.3<br>(35.2, 37.4) | 25      | 29.9<br>(29.1, 30.7) | 43.1<br>(41.9, 44.3) | 44      | 11.5<br>(10.9, 12.0) | 16.0<br>(15.2, 16.8) | 1.4<br>(1.26, 1.62)  | 1.3<br>(1.1, 1.56)   | -7     | 9.0<br>(8.5, 9.5)    | 10.1<br>(9.45, 10.7) | 12     | 0.33<br>(0.27, 0.4)   | 0.23<br>(0.2, 0.3)   |        |     |
| <i>35-49</i>                         | (M) 42,548<br>(F) 37,823 | (M) 23,450<br>(F) 39,013 | 43.4<br>(42.5, 44.2) | 44.1<br>(42.9, 45.2) | 1.6     | 35.3<br>(34.4, 36.2) | 40.2<br>(39.0, 41.3) | 14      | 15.7<br>(15.1, 16.3) | 15.2<br>(14.4, 16.0) | 3.4<br>(3.1, 3.8)    | 3.2<br>(2.8, 3.57)   | -6     | 16.5<br>(15.8, 17.3) | 15.7<br>(14.9, 16.4) | -5     | 0.9<br>(0.76, 1.02)   | 0.6<br>(0.5, 0.7)    |        |     |
| <b>Marital Status</b>                |                          |                          |                      |                      |         |                      |                      |         |                      |                      |                      |                      |        |                      |                      |        |                       |                      |        |     |
| <i>Currently married</i>             | (M) 77,233<br>(F) 95,398 | (M) 40,529<br>(F) 87,754 | 36.9<br>(36.2, 37.6) | 40.6<br>(39.7, 41.5) | 10      | 33.7<br>(32.9, 34.4) | 42.9<br>(41.9, 43.9) | 27      | 13.9<br>(13.5, 14.4) | 15.9<br>(15.3, 16.6) | 1.8<br>(1.6, 1.94)   | 1.8<br>(1.6, 2.02)   | 0      | 9.8<br>(9.3, 10.3)   | 10.9<br>(10.4, 11.5) | 11     | 0.43<br>(0.37, 0.5)   | 0.3<br>(0.26, 0.4)   |        |     |

1  
2  
3  
4  
5  
6  
7  
8  
9  
10  
11  
12  
13  
14  
15  
16  
17  
18  
19  
20  
21  
22  
23  
24  
25  
26  
27  
28  
29  
30  
31  
32  
33  
34  
35  
36  
37  
38  
39  
40  
41  
42  
43  
44  
45  
46  
47  
48  
49

|                             |                            |                           |                      |                       |         |                      |                      |         |                      |                      |                    |                      |     |                      |                      |     |                      |                      |
|-----------------------------|----------------------------|---------------------------|----------------------|-----------------------|---------|----------------------|----------------------|---------|----------------------|----------------------|--------------------|----------------------|-----|----------------------|----------------------|-----|----------------------|----------------------|
| <i>Single</i>               | (M) 52,443<br>(F) 29,623   | (M) 28,377<br>(F) 30,606  | 7.6<br>(7.3, 8.04)   | 18.9<br>(18.2, 19.7)  | 14<br>9 | 12.5<br>(11.9, 12.9) | 27.4<br>(26.4, 28.4) | 11<br>9 | 2.9<br>(2.7, 3.2)    | 8.6<br>(8.1, 9.2)    | 0.3<br>(0.22, 0.4) | 0.09<br>(0.06, 0.14) | -70 | 1.9<br>(1.8, 2.2)    | 2.8<br>(2.5, 3.2)    | 47  | 0.12<br>(0.08, 0.18) | 0.03<br>(0.01, 0.06) |
| <i>Widowed</i>              | (M) 1,070<br>(F) 4,038     | (M) 415<br>(F) 3,909      | 48.7<br>(45.1, 52.3) | 50.1<br>(43.9, 56.3)  | 2.8     | 41.6<br>(38.0, 45.3) | 59.5<br>(53.2, 65.6) | 43      | 19.5<br>(16.8, 22.5) | 23.7<br>(18.7, 29.6) | 4.7<br>(3.86, 5.6) | 3.5<br>(2.78, 4.3)   | -26 | 21.3<br>(19.7, 22.9) | 18.5<br>(16.9, 20.2) | -13 | 1.4<br>(1.05, 1.89)  | 0.9<br>(0.6, 1.4)    |
| <i>Divorced/separated</i>   | (M) 718<br>(F) 1,827       | (M) 434<br>(F) 1,873      | 41.7<br>(37.2, 46.4) | 46.6<br>(39.9, 53.3)  | 12      | 33.4<br>(29.0, 38.1) | 55.9<br>(49.0, 62.7) | 67      | 15.7<br>(12.5, 19.5) | 25.2<br>(19.7, 31.6) | 2.5<br>(1.8, 3.6)  | 1.6<br>(1.0, 2.6)    | -36 | 18.1<br>(15.9, 20.6) | 18.6<br>(16.4, 21.0) | 3   | 0.31<br>(0.13, 0.75) | 0.6<br>(0.3, 1.2)    |
| <b>Religion<sup>1</sup></b> |                            |                           |                      |                       |         |                      |                      |         |                      |                      |                    |                      |     |                      |                      |     |                      |                      |
| <i>Hindu</i>                | (M) 100,339<br>(F) 99,430  | (M) 51,174<br>(F) 89,888  | 26.1<br>(25.5, 26.7) | 33.01<br>(32.2, 33.8) | 27      | 26.6<br>(26.0, 27.3) | 38.2<br>(37.3, 39.1) | 44      | 10.2<br>(9.8, 10.5)  | 13.7<br>(13.2, 14.3) | 1.5<br>(1.4, 1.7)  | 1.5<br>(1.35, 1.7)   | 0   | 8.8<br>(8.3, 9.2)    | 9.6<br>(9.1, 10.2)   | 9   | 0.37<br>(0.31, 0.43) | 0.25<br>(0.2, 0.3)   |
| <i>Muslim</i>               | (M) 16,278<br>(F) 16,215   | (M) 9,145<br>(F) 16,731   | 28.3<br>(26.7, 29.9) | 36.2<br>(34.3, 38.2)  | 28      | 23.4<br>(21.7, 25.1) | 37.4<br>(35.0, 39.8) | 60      | 9.5<br>(8.7, 10.5)   | 13.1<br>(11.9, 14.5) | 1.9<br>(1.6, 2.3)  | 1.73<br>(1.25, 2.4)  | -9  | 9.1<br>(8.3, 9.9)    | 9.9<br>(8.9, 10.9)   | 9   | 0.5<br>(0.37, 0.7)   | 0.4<br>(0.3, 0.7)    |
| <i>Christian</i>            | (M) 8,055<br>(F) 8,547     | (M) 6,250<br>(F) 10,974   | 28.2<br>(25.9, 30.5) | 33.1<br>(29.9, 36.4)  | 17      | 17.5<br>(15.1, 20.1) | 29.1<br>(25.0, 33.5) | 66      | 8.2<br>(6.9, 9.6)    | 12.7<br>(10.4, 15.5) | 2.4<br>(1.7, 3.3)  | 1.3<br>(0.98, 1.62)  | -46 | 9.9<br>(8.4, 11.6)   | 10.7<br>(9.1, 12.5)  | 8   | 0.98<br>(0.72, 1.33) | 0.6<br>(0.5, 0.7)    |
| <i>Others</i>               | (M) 6,792<br>(F) 6,694     | (M) 3,186<br>(F) 6,549    | 11.1<br>(9.5, 12.8)  | 16.2<br>(14.2, 18.4)  | 46      | 19.3<br>(17.1, 21.7) | 26.0<br>(23.1, 29.2) | 35      | 4.4<br>(3.4, 5.6)    | 6.5<br>(5.2, 8.0)    | 0.6<br>(0.4, 0.9)  | 0.4<br>(0.2, 0.65)   | -33 | 7.5<br>(5.8, 9.6)    | 7.6<br>(6.2, 9.4)    | 1   | 0.27<br>(0.13, 0.55) | 0.2<br>(0.1, 0.6)    |
| <i>Total</i>                | (M) 131,464<br>(F) 130,886 | (M) 69,755<br>(F) 124,142 |                      |                       |         |                      |                      |         |                      |                      |                    |                      |     |                      |                      |     |                      |                      |

<sup>1</sup>Large city: urban population ≥1 million; Small city: 100000-1 million; Town: ≤100000 million  
<sup>2</sup>Others include Sikh, Buddhist, Jain, Jewish, Zoroastrian and Others  
 \*Percentage change (% Δ) numbers have been rounded to the nearest integer. Estimates are not age-standardized

Figure 1: Percentage change in smoking among men and women by education level and wealth quintiles

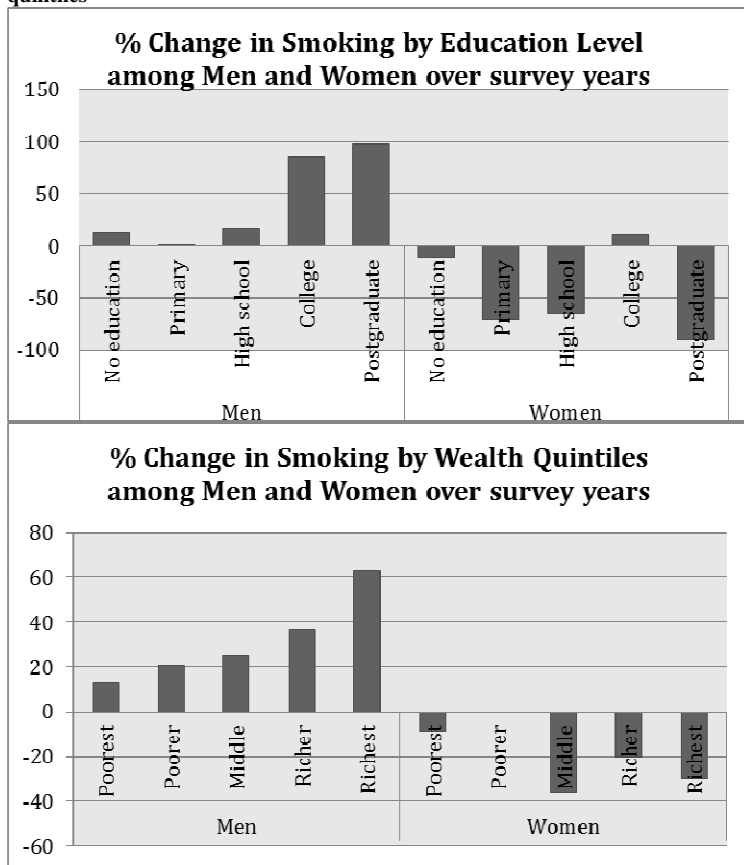

1  
2  
3  
4  
5  
6  
7  
8  
9  
10  
11  
12  
13  
14  
15  
16  
17  
18  
19  
20  
21  
22  
23  
24  
25  
26  
27  
28  
29  
30  
31  
32  
33  
34  
35  
36  
37  
38  
39  
40  
41  
42  
43  
44  
45  
46  
47  
48  
49  
50  
51  
52  
53  
54  
55  
56  
57  
58  
59  
60

Figure 2: Percentage change in chewing among men and women by education level and wealth quintiles

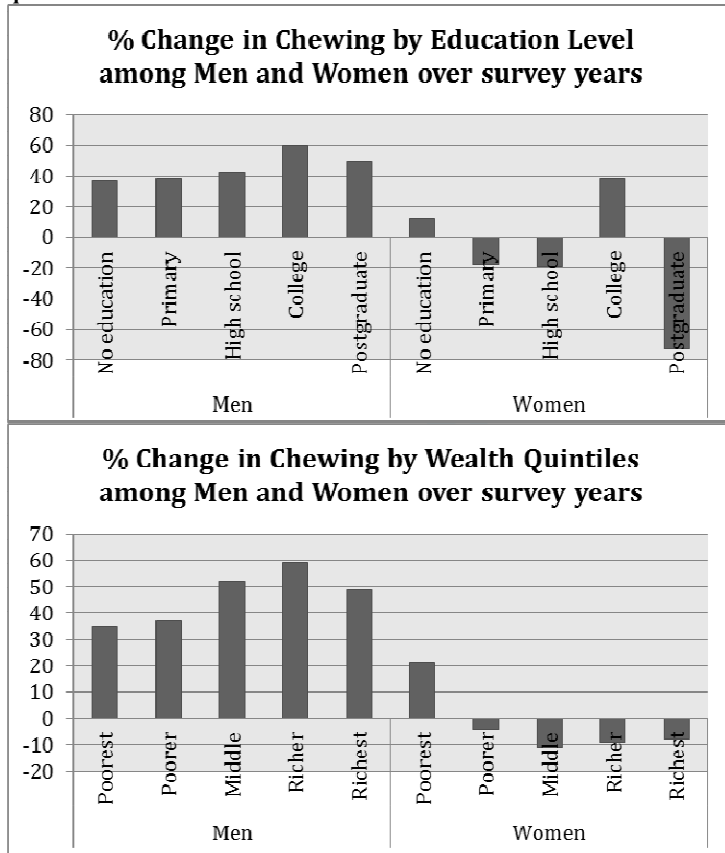

Figure 3: Probability of smoking and chewing among men and women by education and wealth

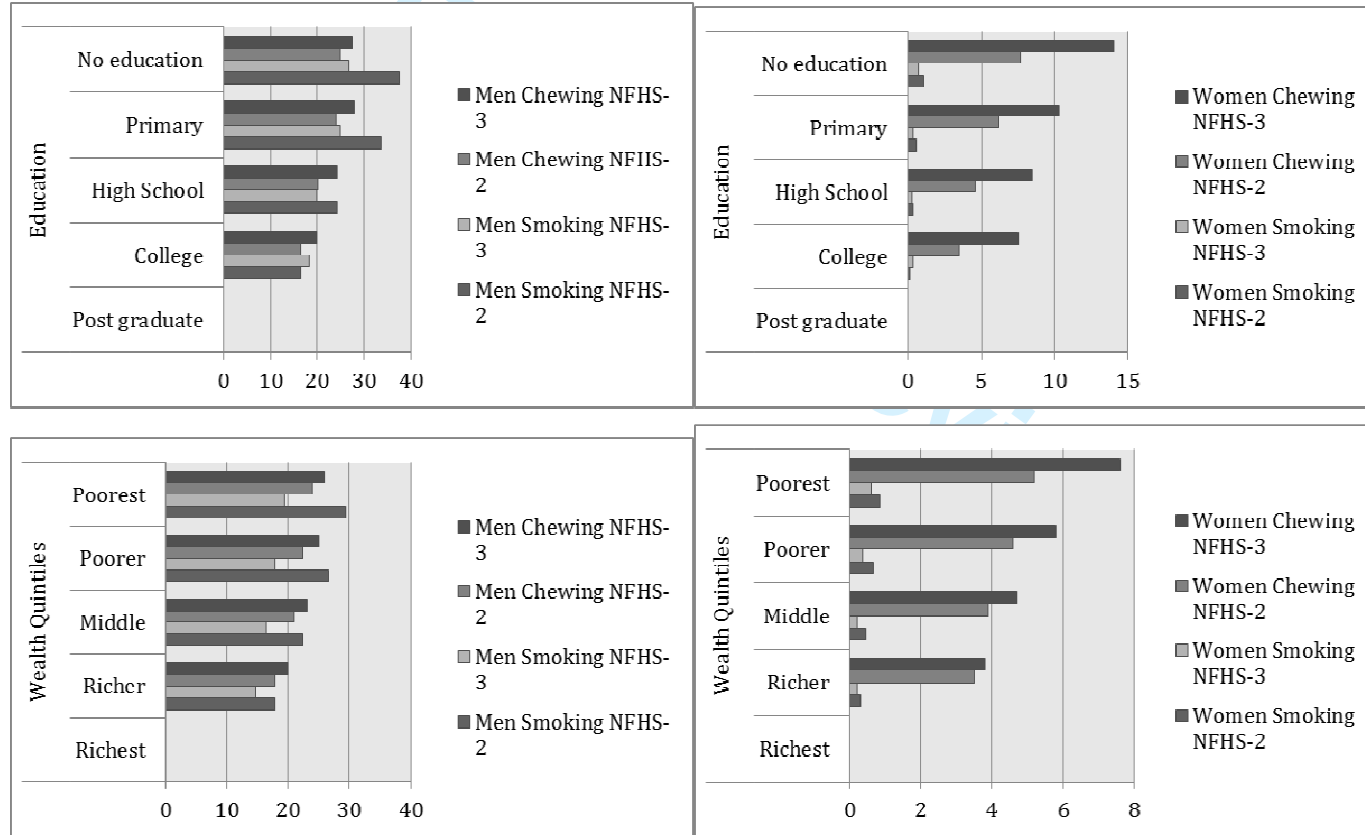

**ACKNOWLEDGEMENTS**

We acknowledge the support of Macro International Inc (Washington, DC) for providing access to the surveys.

**Competing Interests:** None

**Financial Disclosures:** None.

**Funding/Support:** There was no specific funding for this study. NB is supported by the Presidential Scholarship at Harvard University. SA is supported by a Wellcome Trust Strategic Award Grant No. Z/041825. CM conducted this work during a Study Abroad Fellowship funded by the Leverhulme Trust. CM is also funded by the Higher Education Funding Council for England and the National Institute for Health Research.



**References Cited:**

1. Reddy KS, Prabhakaran D, Jeemon P, Thankappan KR, Joshi P, Chaturvedi V, Ramakrishnan L & Ahmed F. "Educational status and cardiovascular risk profile in Indians." *PNAS* 104.41 (2007): 16263-16268.
2. WHO (2008). *WHO Report on the Global Tobacco Epidemic, 2008: The MPOWER package*. Geneva, World Health Organization, 2008.
3. Murray CJL, & Lopez, AD. "Global mortality, disability and the contribution of risk factors: Global Burden of Disease Study." *The Lancet* 349 (1997a): 1436-42.
4. Murray CJL, & Lopez AD. "Alternative projections of mortality and disability by cause 1990-2020: Global Burden of Disease Study." *The Lancet* 349 (1997b): 1498-1504.
5. Rani M, Bonu S, Jha P, Nguyen S, Jamjoum L. "Tobacco use in India: prevalence and predictors of smoking and chewing in a national cross sectional household survey." *Tobacco Control* 12.4 (2003): e4.
6. Subramanian SV, Nandy S, Kelly M, Gordon D & Smith GD. "Patterns and distribution of tobacco consumption in India: cross sectional multilevel evidence from the 1998-9 National Family Health Survey." *BMJ* 328.7443 (2004): 801-6.
7. John RM, Rao RK, Rao MG, Moore J, Deshpande RS, Sengupta J, Selvaraj S, Chaloupka FJ, Jha P. *The economics of tobacco and tobacco taxation in India*. Paris: International Union against Tuberculosis and Lung Disease, 2010.
8. IIPS, & ORC Macro. *National Family Health Survey (NFHS-2), 1998-99*. Data. Mumbai, India: IIPS, 2000.
9. IIPS, & ORC Macro. *National Family Health Survey (NFHS-3), 2005-06: India: Vol I*. Data. Mumbai, India: IIPS, 2007.
10. Lopez AD, Collishaw NE, Piha T. "A descriptive model of the cigarette epidemic in developed countries." *Tobacco Control* 3 (1994): 242-247.
11. Thun M, Peto R, Boreham J, Lopez AD. "Stages of the cigarette epidemic on entering its second century." *Tobacco Control* 21 (2011): 96-101.
12. Sinha DN, Palipudi KM, Rolle I, et al. (2011). Tobacco use among youth and adults in member countries of South-East Asia region: review of findings from surveys under the Global Tobacco Surveillance System. *Indian J Public Health*. 2011; 55(3): 169-76
13. GOI. (2010). *Global Adult Tobacco Survey. GATS India 2009-10*. Report. Ministry of Health & Family Welfare, Government of India. Available online.
14. Jha P, Jacob B, Gajalakshmi V, Gupta PC et al. (2008). A nationally representative case-control study of smoking and death in India. *N Engl J Med*. 2008;358:1137-47
15. Dikshit R, Gupta PC, Ramasundarahettige C, et al. (2012). Cancer mortality in India: a nationally representative survey. *The Lancet*, Mar 28. Epub. DOI:10.1016/S0140-6736(12)60358-4
16. Critchley JA, Unal B. (2003). Health effects associated with smokeless tobacco: a systematic review. *Thorax* 2003; 58:435-443
17. WHO (2008). *WHO Report on the Global Tobacco Epidemic, 2008: The MPOWER package*. "Gender, Women and the Tobacco Epidemic. Summary and Overview". Geneva, World Health Organization, 2008.
18. Fernandez E, Garcia M, Schiaffino A, Borrás JM, Nebotm & Segura A. "Smoking initiation and cessation by gender and educational level in Catalonia, Spain." (2002).
19. Viswanath K, Ackerson LK, Sorensen G, et al. (2010). Movies and TV influence tobacco use in India: findings from a national survey. *PLoS One*. 2010;5(6):e11365
20. Stigler M, Dhavan P, Van Dusen D, et al. (2010). Westernization and tobacco use among young people in Delhi, India. *Soc Sci Med*. 2010; 71(5): 891-7
21. Shah PB, Pednekar MS, Gupta PC, et al. (2008). The relationship between tobacco advertisements and smoking status of youth in India. *Asian Pac J Cancer Prev*. 2008;9(4):637-42
22. Ebrahim S, . "Surveillance and Monitoring for Chronic Diseases: A Vital Investment." *The National Medical Journal of India*. *Editorial* 22.3 (2011): 129-132.
23. Palipudi KM, Gupta PC, Sinha DN, et al. (2012). Social determinants of health and tobacco use in thirteen low and middle income countries: evidence from Global Adult tobacco Survey. *Plos One*. 2012. 7(3):e33466.

Figure 1: Percentage change in smoking among men and women by education level and wealth quintiles

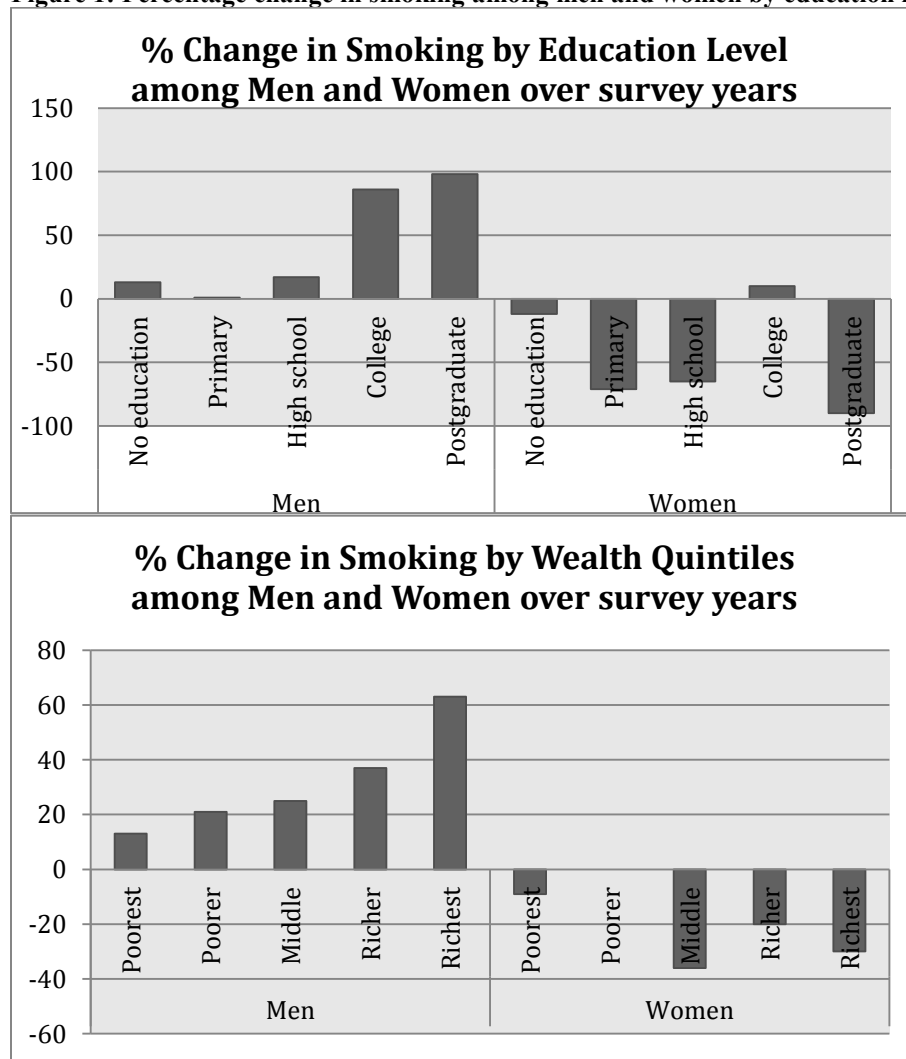

Figure 2: Percentage change in chewing among men and women by education level and wealth quintiles

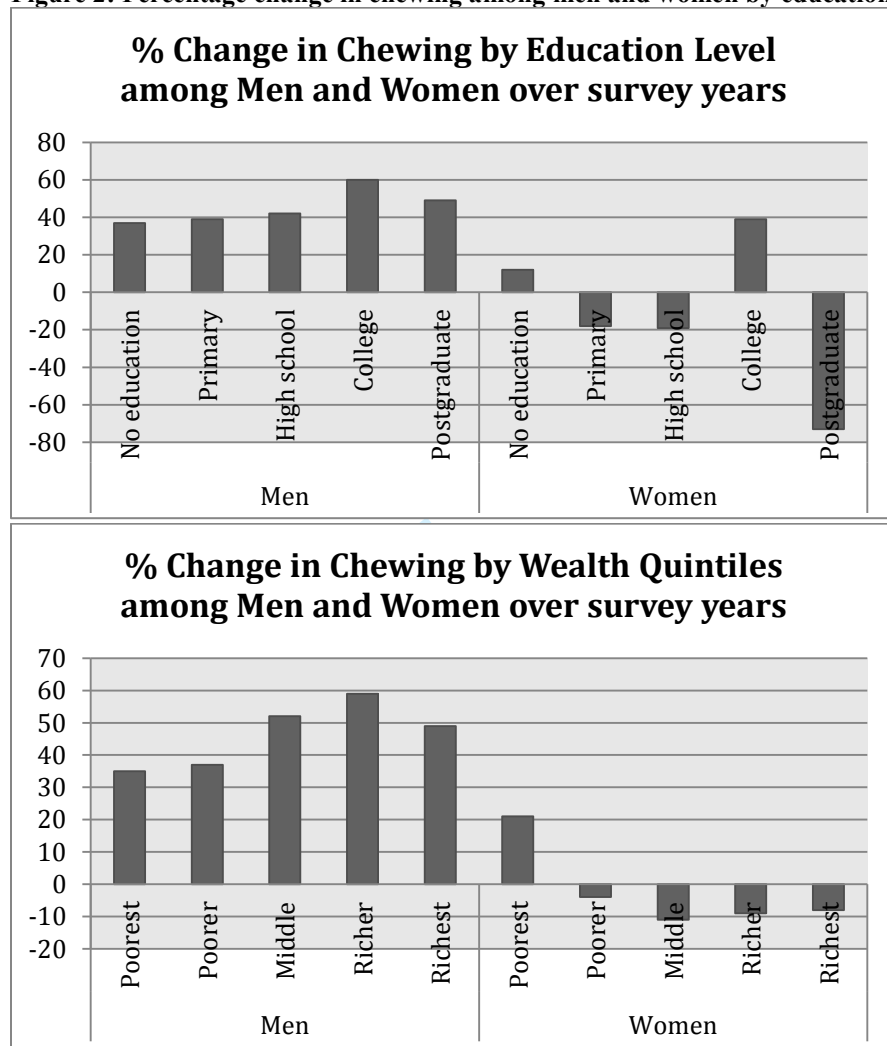

1  
2  
3  
4  
5  
6  
7  
8  
9  
10  
11  
12  
13  
14  
15  
16  
17  
18  
19  
20  
21  
22  
23  
24  
25  
26  
27  
28  
29  
30  
31  
32  
33  
34  
35  
36  
37  
38  
39  
40  
41  
42  
43  
44  
45  
46  
47  
48  
49

Figure 3: Probability of smoking and chewing among men and women by education and wealth

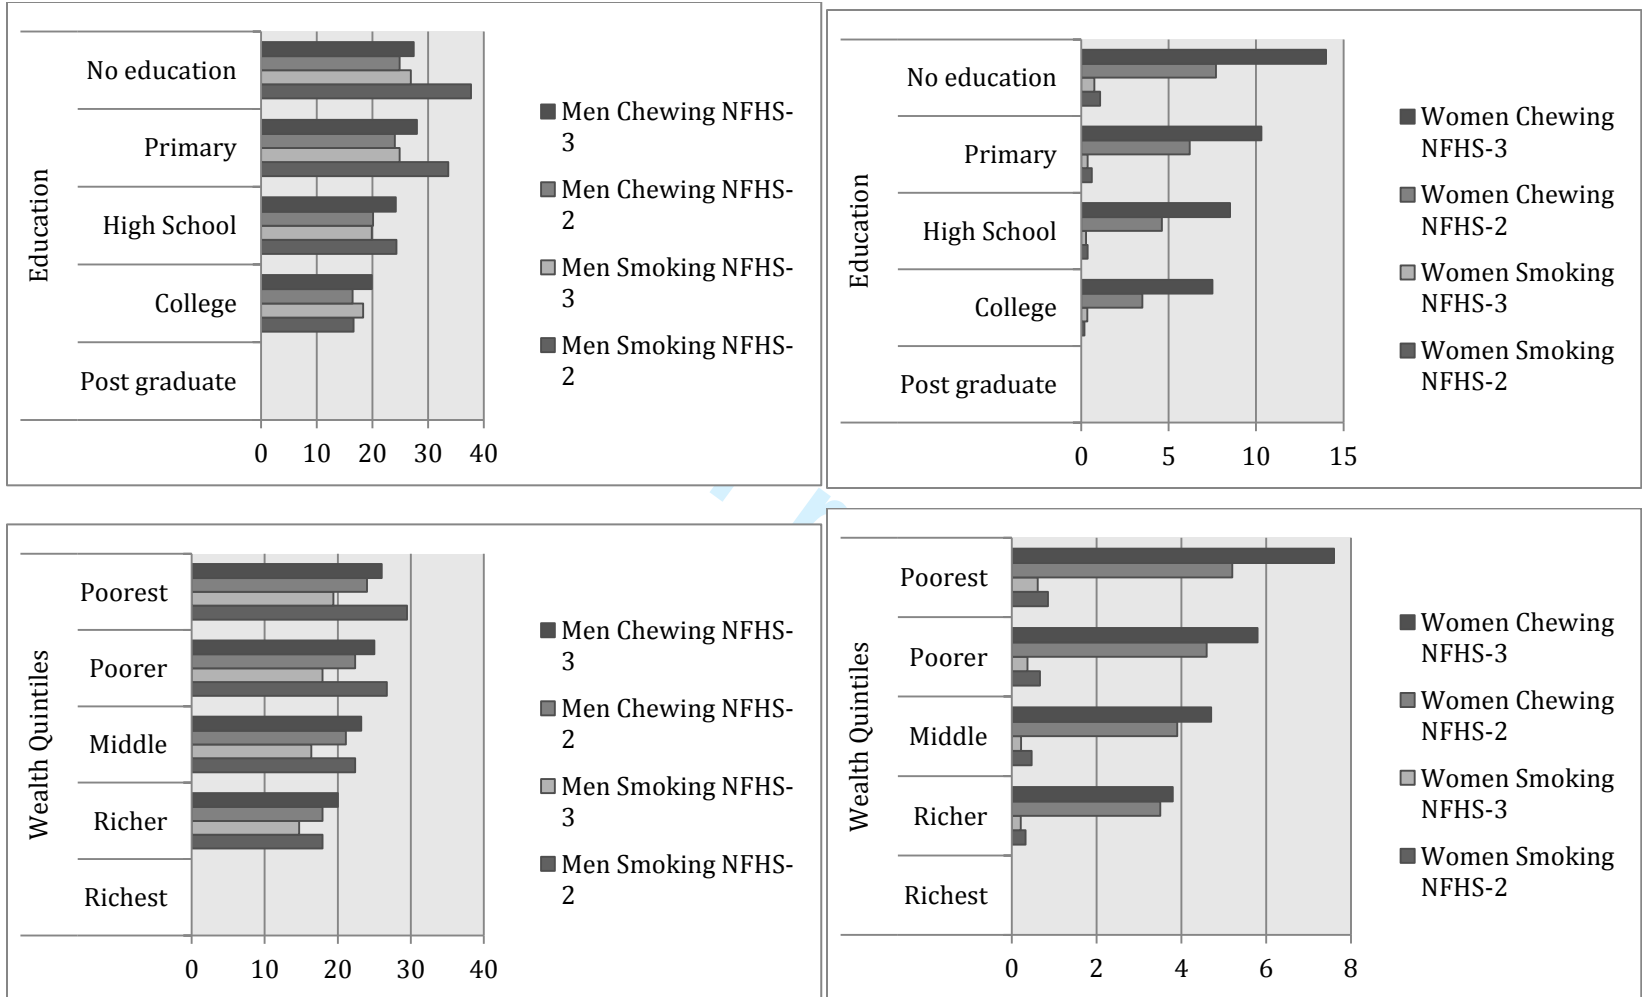

Web Table 1: Prevalence (%) of tobacco smoking, chewing and dual use (smoking and chewing) by living environment, age, religion and marital status among men and women in the National Family Health Surveys 1998-99 and 2005-6

|                                      | Sample Population        |                          | MEN                     |                         |         |                         |                              |         |                         |                              |                         | FEMALE                  |        |                         |                         |        |                          |                         |        |     |
|--------------------------------------|--------------------------|--------------------------|-------------------------|-------------------------|---------|-------------------------|------------------------------|---------|-------------------------|------------------------------|-------------------------|-------------------------|--------|-------------------------|-------------------------|--------|--------------------------|-------------------------|--------|-----|
|                                      |                          |                          | SMOKE                   |                         |         | CHEW                    |                              |         | DUAL                    |                              |                         | SMOKE                   |        |                         | CHEW                    |        |                          | DUAL                    |        |     |
|                                      |                          |                          | 1998-9                  | 2005-6                  | % Δ     | 1998-9                  | 2005-6                       | % Δ     | 1998-9                  | 2005-6                       | % Δ                     | 1998-9                  | 2005-6 | % Δ                     | 1998-9                  | 2005-6 | % Δ                      | 1998-9                  | 2005-6 | % Δ |
| <b>Area of residence<sup>1</sup></b> |                          |                          |                         |                         |         |                         |                              |         |                         |                              |                         |                         |        |                         |                         |        |                          |                         |        |     |
| <i>Large city</i>                    | (M) 17,640<br>(F) 16,081 | (M) 19,092<br>(F) 26,272 | 17.7<br>(16.6,<br>18.9) | 27.2<br>(25.7,<br>28.8) | 54      | 19.1<br>(17.4,21<br>.1) | 30.3<br>(28.2,<br>32.5)      | 59      | 6.05<br>(5.4,6<br>.8)   | 10.2<br>(9.2,<br>11.3)       | 0.3(0.2<br>, 0.4)       | 0.4<br>(0.3,0.<br>6)    | 33     | 5.8<br>(4.9,6.9<br>)    | 4.9<br>(4.1,5.<br>9)    | -16    | 0.09<br>(0.06,0<br>.14)  | 0.055<br>(0.03,0<br>.1) |        |     |
| <i>Small city</i>                    | (M) 8,957<br>(F) 8,573   | (M) 4,723<br>(F) 9,318   | 18.3<br>(16.4,2<br>0.2) | 28.8<br>(26.5,<br>31.2) | 57      | 19.4<br>(17.1,<br>22.0) | 34.2<br>(31.1,<br>37.4)      | 76      | 5.8<br>(4.95,<br>6.8)   | 10.9<br>(9.6,<br>12.5)       | 0.3<br>(0.2,0.<br>5)    | 0.5<br>(0.35,0<br>.7)   | 67     | 5.9<br>(4.8,7.1<br>)    | 6.6<br>(5.5,8.<br>1)    | 12     | 0.06<br>(0.03,0<br>.14)  | 0.09<br>(0.04,0<br>.2)  |        |     |
| <i>Town</i>                          | (M) 18,837<br>(F) 18,803 | (M) 12,078<br>(F) 21,256 | 19.9<br>(18.6,2<br>1.2) | 30.3<br>(28.4,<br>32.2) | 52      | 20.6<br>(18.7,22<br>.5) | 31.1<br>(28.6,<br>33.7)      | 51      | 6.3<br>(5.6,7<br>.1)    | 10.5<br>(9.4,<br>11.7)       | 0.6<br>(0.5,0.<br>8)    | 0.6<br>(0.4,0.<br>8)    | 0      | 6.7<br>(5.8,7.8<br>)    | 7.2<br>(6.1,8.<br>4)    | 8      | 0.2<br>(0.15,0<br>.3)    | 0.1<br>(0.07,0<br>.2)   |        |     |
| <i>Village</i>                       | (M) 86,030<br>(F) 87,429 | (M) 33,862<br>(F) 67,296 | 28.9<br>(28.2,2<br>9.6) | 35.2<br>(34.2,<br>36.2) | 22      | 28.2<br>(27.4,28<br>.9) | 40.9<br>(39.8,<br>41.9)      | 45      | 11.4<br>(10.9,<br>11.8) | 15.0<br>(14.<br>3,15<br>.7)  | 2.04<br>(1.85,2<br>.24) | 1.98<br>(1.75,2<br>.24) | -3     | 9.8<br>(9.3,10.<br>3)   | 11.3<br>(10.6,1<br>1.9) | 15     | 0.5<br>(0.43,0<br>.6)    | 0.4<br>(0.3,0.<br>5)    |        |     |
| <b>Age-groups</b>                    |                          |                          |                         |                         |         |                         |                              |         |                         |                              |                         |                         |        |                         |                         |        |                          |                         |        |     |
| <i>15-24</i>                         | (M) 50,266<br>(F) 52,299 | (M) 25,511<br>(F) 46,688 | 8.6<br>(8.2,<br>9.1)    | 19.2<br>(18.4,<br>20.1) | 12<br>3 | 14.3<br>(13.7,<br>14.9) | 30.3<br>(29.2,<br>31.4)      | 11<br>2 | 3.5<br>(3.3,3<br>.8)    | 9.45<br>(8.9,<br>10.1)       | 0.4<br>(0.31,0<br>.45)  | 0.3<br>(0.21,0<br>.36)  | -25    | 3.1<br>(2.8,3.3<br>)    | 4.4<br>(3.99,4<br>.7)   | 42     | 0.098<br>(0.07,0<br>.14) | 0.08<br>(0.05,0<br>.13) |        |     |
| <i>25-34</i>                         | (M) 38,650<br>(F) 40,764 | (M) 20,794<br>(F) 38,441 | 29.1<br>(28.3,<br>29.9) | 36.3<br>(35.2,<br>37.4) | 25      | 29.9<br>(29.1,<br>30.7) | 43.1<br>(41.9,<br>44.3)      | 44      | 11.5<br>(10.9,<br>12.0) | 16.0<br>(15.<br>2,16<br>.8)  | 1.4<br>(1.26,1<br>.62)  | 1.3<br>(1.1,1.<br>56)   | -7     | 9.0<br>(8.5,9.5<br>)    | 10.1<br>(9.45,1<br>0.7) | 12     | 0.33<br>(0.27,0<br>.4)   | 0.23<br>(0.2,0.<br>3)   |        |     |
| <i>35-49</i>                         | (M) 42,548<br>(F) 37,823 | (M) 23,450<br>(F) 39,013 | 43.4<br>(42.5,<br>44.2) | 44.1<br>(42.9,<br>45.2) | 1.6     | 35.3<br>(34.4,<br>36.2) | 40.2<br>(39.0<br>2,41.<br>3) | 14      | 15.7<br>(15.1,<br>16.3) | 15.2<br>(14.<br>4,16<br>.01) | 3.4<br>(3.1,3.<br>8)    | 3.2<br>(2.84,3<br>.57)  | -6     | 16.5<br>(15.8,17<br>.3) | 15.7<br>(14.9,1<br>6.4) | -5     | 0.9<br>(0.76,1<br>.02)   | 0.6<br>(0.5,0.<br>7)    |        |     |
| <b>Marital Status</b>                |                          |                          |                         |                         |         |                         |                              |         |                         |                              |                         |                         |        |                         |                         |        |                          |                         |        |     |
| <i>Currently married</i>             | (M) 77,233<br>(F) 95,398 | (M) 40,529<br>(F) 87,754 | 36.9<br>(36.2,3<br>7.6) | 40.6<br>(39.7,<br>41.5) | 10      | 33.7<br>(32.9,<br>34.4) | 42.9<br>(41.9,<br>43.9)      | 27      | 13.9<br>(13.5,<br>14.4) | 15.9<br>(15.<br>3,16<br>.6)  | 1.8<br>(1.6,<br>1.94)   | 1.8<br>(1.6,2.<br>02)   | 0      | 9.8<br>(9.3,10.<br>3)   | 10.9<br>(10.4,1<br>1.5) | 11     | 0.43<br>(0.37,0<br>.5)   | 0.3<br>(0.26,0<br>.4)   |        |     |
| <i>Single</i>                        | (M) 52,443<br>(F) 29,623 | (M) 28,377<br>(F) 30,606 | 7.6<br>(7.3,<br>8.04)   | 18.9<br>(18.2,<br>19.7) | 14<br>9 | 12.5<br>(11.9,12<br>.9) | 27.4<br>(26.4,<br>28.4)      | 11<br>9 | 2.9<br>(2.7,3<br>.2)    | 8.6<br>(8.1,<br>9.2)         | 0.3<br>(0.22,0<br>.4)   | 0.09<br>(0.06,0<br>.14) | -70    | 1.9<br>(1.8,2.2<br>)    | 2.8<br>(2.5,3.<br>2)    | 47     | 0.12<br>(0.08,0<br>.18)  | 0.03<br>(0.01,0<br>.06) |        |     |

|                                |                                  |                                 |                         |                          |     |                          |                              |    |                         |                             |                       |                        |     |                         |                          |     |                         |                       |
|--------------------------------|----------------------------------|---------------------------------|-------------------------|--------------------------|-----|--------------------------|------------------------------|----|-------------------------|-----------------------------|-----------------------|------------------------|-----|-------------------------|--------------------------|-----|-------------------------|-----------------------|
| <i>Widowed</i>                 | (M) 1,070<br>(F) 4,038           | (M) 415<br>(F) 3,909            | 48.7<br>(45.1,5<br>2.3) | 50.1<br>(43.9,<br>56.3)  | 2.8 | 41.6<br>(38.0,45<br>.3)  | 59.5<br>(53.2,<br>65.6)      | 43 | 19.5<br>(16.8,<br>22.5) | 23.7<br>(18.<br>7,29<br>.6) | 4.7<br>(3.86,<br>5.6) | 3.5<br>(2.78,4<br>.3)  | -26 | 21.3<br>(19.7,22<br>.9) | 18.5<br>(16.9,2<br>0.2)  | -13 | 1.4<br>(1.05,1<br>.89)  | 0.9<br>(0.6,1.<br>4)  |
| <i>Divorced/<br/>separated</i> | (M) 718<br>(F) 1,827             | (M) 434<br>(F) 1,873            | 41.7<br>(37.2,4<br>6.4) | 46.6<br>(39.9,<br>53.3)  | 12  | 33.4<br>(29.01,<br>38.1) | 55.9<br>(49.0<br>3,62.<br>7) | 67 | 15.7<br>(12.5,<br>19.5) | 25.2<br>(19.<br>7,31<br>.6) | 2.5<br>(1.8,3.<br>6)  | 1.6<br>(1.01,2<br>.6)  | -36 | 18.1<br>(15.9,20<br>.6) | 18.6<br>(16.4,<br>21.01) | 3   | 0.31<br>(0.13,0<br>.75) | 0.6<br>(0.3,1.<br>2)  |
| <b>Religion<sup>2</sup></b>    |                                  |                                 |                         |                          |     |                          |                              |    |                         |                             |                       |                        |     |                         |                          |     |                         |                       |
| <i>Hindu</i>                   | (M)<br>100,339<br>(F) 99,430     | (M) 51,174<br>(F) 89,888        | 26.1<br>(25.5,2<br>6.7) | 33.01<br>(32.2,<br>33.8) | 27  | 26.6<br>(26.0,<br>27.3)  | 38.2<br>(37.3,<br>39.1)      | 44 | 10.2<br>(9.8,1<br>0.5)  | 13.7<br>(13.<br>2,14<br>.3) | 1.5<br>(1.4,1.<br>7)  | 1.5<br>(1.35,1<br>.7)  | 0   | 8.8<br>(8.3,9.2<br>)    | 9.6<br>(9.1,10<br>.2)    | 9   | 0.37<br>(0.31,0<br>.43) | 0.25<br>(0.2,0.<br>3) |
| <i>Muslim</i>                  | (M) 16,278<br>(F) 16,215         | (M) 9,145<br>(F) 16,731         | 28.3<br>(26.7,2<br>9.9) | 36.2<br>(34.3,<br>38.2)  | 28  | 23.4<br>(21.7,25<br>.1)  | 37.4<br>(35.0<br>2,39.<br>8) | 60 | 9.5<br>(8.7,1<br>0.5)   | 13.1<br>(11.<br>9,14<br>.5) | 1.9<br>(1.6,2.<br>3)  | 1.73<br>(1.25,2<br>.4) | -9  | 9.1<br>(8.3,9.9<br>)    | 9.9<br>(8.9,10<br>.9)    | 9   | 0.5<br>(0.37,0<br>.7)   | 0.4<br>(0.3,0.<br>7)  |
| <i>Christian</i>               | (M) 8,055<br>(F) 8,547           | (M) 6,250<br>(F) 10,974         | 28.2<br>(25.9,3<br>0.5) | 33.1<br>(29.9,<br>36.4)  | 17  | 17.5<br>(15.1,<br>20.1)  | 29.1<br>(25.0<br>1,33.<br>5) | 66 | 8.2<br>(6.9,9<br>.6)    | 12.7<br>(10.<br>4,15<br>.5) | 2.4<br>(1.7,3.<br>3)  | 1.3<br>(0.98,1<br>.62) | -46 | 9.9<br>(8.4,11.<br>6)   | 10.7<br>(9.1,12<br>.5)   | 8   | 0.98<br>(0.72,1<br>.33) | 0.6<br>(0.5,0.<br>7)  |
| <i>Others</i>                  | (M) 6,792<br>(F) 6,694           | (M) 3,186<br>(F) 6,549          | 11.1<br>(9.5,12<br>.8)  | 16.2<br>(14.2,<br>18.4)  | 46  | 19.3<br>(17.1,21<br>.7)  | 26.0<br>(23.1,<br>29.2)      | 35 | 4.4<br>(3.4,5<br>.6)    | 6.5<br>(5.2,<br>8.0)        | 0.6<br>(0.4,<br>0.9)  | 0.4<br>(0.2,0.<br>65)  | -33 | 7.5<br>(5.8,9.6<br>)    | 7.6<br>(6.2,9.<br>4)     | 1   | 0.27<br>(0.13,0<br>.55) | 0.2<br>(0.1,0.<br>6)  |
| <i>Total</i>                   | (M)<br>131,464<br>(F)<br>130,886 | (M)<br>69,755<br>(F)<br>124,142 |                         |                          |     |                          |                              |    |                         |                             |                       |                        |     |                         |                          |     |                         |                       |

<sup>1</sup>Large city: urban population ≥1 million; Small city: 100000-1 million; Town: ≤100000 million

<sup>2</sup>Others include Sikh, Buddhist, Jain, Jewish, Zoroastrian and Others

\*Percentage change (% Δ) numbers have been rounded to the nearest integer. Estimates are not age-standardized
